# Supplementary material for: Major impacts of widespread structural variation on sorghum
Source: HighWire-hosted journal article supplement (doi:10.1101/gr.278396.123), 2024-02-01
Supplement: Supplemental_Table_S1.xlsx [file Supplemental_Table_S1.xlsx]

## Sheet: Sheet1
Supplemental Table S1 363 sorghum accessions
Accession ID	Variety Type	Photoperiod Sensitivity	Country of Origin	Race	Accession name	Biological status of accession	Ancestral information (pedigree)	Other mes	Scientific name
PI 144134	Sweet	Photoperiod_Insensitive			Inyangentombi	Other			Sorghum bicolor (L.) Moench subsp. bicolor
PI 145619	Sweet	Photoperiod_Insensitive	South Africa	Caudatum	ISIDOMBA	Other			Sorghum bicolor (L.) Moench subsp. bicolor
PI 145626	Sweet	Photoperiod_Insensitive	South Africa	Kafir-bicolor	Manyoble	Other			Sorghum bicolor (L.) Moench subsp. bicolor
PI 145632	Sweet	Photoperiod_Insensitive	South Africa		TEGEVINI	Other			Sorghum bicolor (L.) Moench subsp. bicolor
PI 145633	Cellulosic	Photoperiod_Insensitive	South Africa		Tugela Ferry	Other			Sorghum bicolor (L.) Moench subsp. bicolor
PI 146890	Sweet	Photoperiod_Insensitive	Zaire, Republic of		SUGAR DRIP	Other			Sorghum bicolor (L.) Moench subsp. bicolor
PI 147224	Sweet	Photoperiod_Insensitive	India		B. 35				Sorghum bicolor (L.) Moench subsp. bicolor
PI 152591	Cellulosic	Photoperiod_Sensitive	Kenya	Caudatum	AKUR GOK				Sorghum bicolor (L.) Moench subsp. bicolor
PI 152651	Sweet	Photoperiod_Insensitive	Sudan		Feterita Geshaish			SAP-59	Sorghum bicolor (L.) Moench subsp. bicolor
PI 152694	Sweet	Photoperiod_Insensitive	Sudan		Kafir Slongi	Other			Sorghum bicolor (L.) Moench subsp. bicolor
PI 152727	Cellulosic	Photoperiod_Sensitive	Kenya		Malwal Tonj				Sorghum bicolor (L.) Moench subsp. bicolor
PI 152728	Cellulosic	Photoperiod_Sensitive	Sudan	Durra	MANALEK	Other			Sorghum bicolor (L.) Moench subsp. bicolor
PI 152733	Sweet	Photoperiod_Sensitive	Sudan	Caudatum	MERISSA (BARI)				Sorghum bicolor (L.) Moench subsp. bicolor
PI 152751	Sweet	Photoperiod_Sensitive	Sudan	Guinea-caudatum	NYTWAL	Other			Sorghum bicolor (L.) Moench subsp. bicolor
PI 152771	Sweet	Photoperiod_Insensitive	Sudan		RAHMETALLA GALLABAT	Other			Sorghum bicolor (L.) Moench subsp. bicolor
PI 152816	Sweet	Photoperiod_Insensitive	Sudan		WAD FUR WHITE	Other			Sorghum bicolor (L.) Moench subsp. bicolor
PI 152828	Cellulosic	Photoperiod_Insensitive	Zaire, Republic of		U.T. 23	Other			Sorghum bicolor (L.) Moench subsp. bicolor
PI 152860	Sweet	Photoperiod_Sensitive	Sudan		MERASI	Other			Sorghum bicolor (L.) Moench subsp. bicolor
PI 152862	Sweet	Photoperiod_Insensitive	Sudan		KULUM BROWN	Other			Sorghum bicolor (L.) Moench subsp. bicolor
PI 152923	Cellulosic	Photoperiod_Insensitive	Sudan		Duro El Jack	Other			Sorghum bicolor (L.) Moench subsp. bicolor
PI 152961	Sweet	Photoperiod_Insensitive	Sudan		MALNAL	Other			Sorghum bicolor (L.) Moench subsp. bicolor
PI 152963	Cellulosic	Photoperiod_Sensitive	Sudan		Thok (B)	Other			Sorghum bicolor (L.) Moench subsp. bicolor
PI 152965	Sweet	Photoperiod_Insensitive	Sudan	Caudatum	TADA	Other			Sorghum bicolor (L.) Moench subsp. bicolor
PI 152966	Sweet	Photoperiod_Insensitive	Sudan		Ayuak	Other			Sorghum bicolor (L.) Moench subsp. bicolor
PI 152967	Sweet	Photoperiod_Insensitive	Sudan		WERAKAN	Other			Sorghum bicolor (L.) Moench subsp. bicolor
PI 152971	Sweet	Photoperiod_Insensitive	Sudan		AWANLEK	Other			Sorghum bicolor (L.) Moench subsp. bicolor
PI 153877	Cellulosic	Photoperiod_Sensitive	Kenya	Guinea	MUEMBE				Sorghum bicolor (L.) Moench subsp. bicolor
PI 154846	Sweet	Photoperiod_Sensitive	Uganda		KABIRI				Sorghum bicolor (L.) Moench subsp. bicolor
PI 154944	Cellulosic	Photoperiod_Insensitive	Uganda		L31 Emiroit	Other			Sorghum bicolor (L.) Moench subsp. bicolor
PI 154987	Sweet	Photoperiod_Sensitive	Swaziland		S. A. 1				Sorghum bicolor (L.) Moench subsp. bicolor
PI 154988	Cellulosic	Photoperiod_Insensitive	Swaziland		S. A. 2				Sorghum bicolor (L.) Moench subsp. bicolor
PI 155149	Sweet	Photoperiod_Sensitive	Yemen		Dhurra No. 7	Other			Sorghum bicolor (L.) Moench subsp. bicolor
PI 155516	Cellulosic	Photoperiod_Sensitive	Zambia		MASAKA	Other			Sorghum bicolor (L.) Moench subsp. bicolor
PI 155760	Cellulosic	Photoperiod_Insensitive	Malawi	Guinea-caudatum	Namuse	Other			Sorghum bicolor (L.) Moench subsp. bicolor
PI 155885	Cellulosic	Photoperiod_Sensitive	Tanzania		MN 1644	Other			Sorghum bicolor (L.) Moench subsp. bicolor
PI 156018	Cellulosic	Photoperiod_Sensitive	Zaire, Republic of	Bicolor	MN 1615	Other			Sorghum bicolor (L.) Moench subsp. bicolor
PI 156178	Cellulosic	Photoperiod_Sensitive	Malawi	Guinea	MN 2014			1159	Sorghum bicolor (L.) Moench subsp. bicolor
PI 156203	Cellulosic	Photoperiod_Sensitive	Malawi	Caudatum-bicolor	MN 2089				Sorghum bicolor (L.) Moench subsp. bicolor
PI 156217	Cellulosic	Photoperiod_Sensitive	Malawi	Caudatum	MN 2109	Other			Sorghum bicolor (L.) Moench subsp. bicolor
PI 156326	Cellulosic	Photoperiod_Sensitive	Zambia	Caudatum	CHIMPAMBA	Other		1353	Sorghum bicolor (L.) Moench subsp. bicolor
PI 156330	Cellulosic	Photoperiod_Sensitive	Zambia	Durra-caudatum	KAPUPU			1355	Sorghum bicolor (L.) Moench subsp. bicolor
PI 156393	Cellulosic	Photoperiod_Sensitive	Tanzania	Caudatum	MN 2277				Sorghum bicolor (L.) Moench subsp. bicolor
PI 156463	Cellulosic	Photoperiod_Sensitive	Tanzania	Caudatum	Dobbs	Other			Sorghum bicolor (L.) Moench subsp. bicolor
PI 156487	Cellulosic	Photoperiod_Sensitive	Tanzania	Guinea	MN 2363				Sorghum bicolor (L.) Moench subsp. bicolor
PI 156871	Cellulosic	Photoperiod_Sensitive	Zaire, Republic of	Caudatum	Rutobo	Other		55	Sorghum bicolor (L.) Moench subsp. bicolor
PI 156890	Sweet	Photoperiod_Insensitive	Zaire, Republic of		Dura Huria	Other		74	Sorghum bicolor (L.) Moench subsp. bicolor
PI 157030	Cellulosic	Photoperiod_Sensitive	Kenya	Caudatum	Andiwo III 57	Other			Sorghum bicolor (L.) Moench subsp. bicolor
PI 157033	Sweet	Photoperiod_Sensitive	Kenya	Caudatum	Ifube No. 18	Other			Sorghum bicolor (L.) Moench subsp. bicolor
PI 157035	Sweet	Photoperiod_Sensitive	Kenya		Nyagwang No. 56	Other			Sorghum bicolor (L.) Moench subsp. bicolor
PI 157804	Cellulosic	Photoperiod_Insensitive	Sudan		Feterita Abu Derega	Other			Sorghum bicolor (L.) Moench subsp. bicolor
PI 167093	Sweet	Photoperiod_Insensitive	Egypt	Durra	IS 81	Other			Sorghum bicolor (L.) Moench subsp. bicolor
PI 170787	Sweet	Photoperiod_Insensitive	Turkey	Caudatum-bicolor	MN 2826	Other			Sorghum bicolor (L.) Moench subsp. bicolor
PI 175919	Sweet	Photoperiod_Insensitive	Turkey	Caudatum-bicolor	IS 12833				Sorghum bicolor (L.) Moench subsp. bicolor
PI 176766	Cellulosic	Photoperiod_Insensitive	Turkey	Bicolor	MN 2873				Sorghum bicolor (L.) Moench subsp. bicolor
PI 179749	Cellulosic	Photoperiod_Insensitive	India	Durra	Juar				Sorghum bicolor (L.) Moench subsp. bicolor
PI 180348	Sweet	Photoperiod_Insensitive	India	Durra	Juar	Other			Sorghum bicolor (L.) Moench subsp. bicolor
PI 181080	Cellulosic	Photoperiod_Insensitive	India		HONEY SORGHUM	Other			Sorghum bicolor (L.) Moench subsp. bicolor
PI 181083	Cellulosic	Photoperiod_Insensitive	India	Durra-bicolor	KAMANDRI	Other			Sorghum bicolor (L.) Moench subsp. bicolor
PI 181899	Cellulosic	Photoperiod_Insensitive	Syria		MN 2938	Other			Sorghum bicolor (L.) Moench subsp. bicolor
PI 185573	Cellulosic		South Africa		38				Sorghum bicolor (L.) Moench subsp. verticilliflorum (Steud.) de Wet ex Wiersema & J. Dahlb.
PI 196049	Sweet	Photoperiod_Sensitive	Ethiopia	Durra	IS 2131	Other			Sorghum bicolor (L.) Moench subsp. bicolor
PI 196583	Sweet	Photoperiod_Insensitive			MN 3080	Other			Sorghum bicolor (L.) Moench subsp. bicolor
PI 196586	Sweet	Photoperiod_Insensitive		Guinea-kafir	MN 3083	Other		No. 4	Sorghum bicolor (L.) Moench subsp. bicolor
PI 196598	Grain	Photoperiod_Insensitive			MN 3095	Other		No. 18	Sorghum bicolor (L.) Moench subsp. bicolor
PI 197542	Cellulosic	Photoperiod_Insensitive	Algeria	Bicolor	SUCRE DROME				Sorghum bicolor (L.) Moench subsp. bicolor
PI 19770	Sweet	Photoperiod_Insensitive	South Africa	Caudatum-bicolor	COLLIER				Sorghum bicolor (L.) Moench subsp. bicolor
PI 213901	Cellulosic		Zimbabwe		A-2791				Sorghum bicolor (L.) Moench subsp. verticilliflorum (Steud.) de Wet ex Wiersema & J. Dahlb.
PI 217691	Cellulosic	Photoperiod_Insensitive	Sudan		NAGAD EL MUR			43	Sorghum bicolor (L.) Moench subsp. bicolor
PI 218112	Sweet	Photoperiod_Insensitive	Pakistan	Durra	IS 2352	Other			Sorghum bicolor (L.) Moench subsp. bicolor
PI 221548	Sweet	Photoperiod_Insensitive	Nigeria	Kafir	AJEBICHINKA	Other			Sorghum bicolor (L.) Moench subsp. bicolor
PI 221651	Cellulosic	Photoperiod_Sensitive	Nigeria	Guinea	UWARETE	Other			Sorghum bicolor (L.) Moench subsp. bicolor
PI 239439	Grain		South Africa		BIRDPROOF				Sorghum bicolor (L.) Moench subsp. bicolor
PI 250583	Sweet	Photoperiod_Insensitive	Egypt	Durra	MN 4125	Other			Sorghum bicolor (L.) Moench subsp. bicolor
PI 251672	Sweet	Photoperiod_Insensitive	Serbia and Montenegro		MN 4135	Other		1035	Sorghum bicolor (L.) Moench subsp. bicolor
PI 253986	Cellulosic	Photoperiod_Insensitive	Syria		MN 4138	Other			Sorghum bicolor (L.) Moench subsp. bicolor
PI 255744	Cellulosic	Photoperiod_Insensitive	Turkey		MN 4466	Other			Sorghum bicolor (L.) Moench subsp. bicolor
PI 257599	Sweet	Photoperiod_Insensitive	Ethiopia	Caudatum	NO. 5 GAMBELA	Other			Sorghum bicolor (L.) Moench subsp. bicolor
PI 257600	Sweet	Photoperiod_Insensitive	Ethiopia	Caudatum	NO. 6 GAMBELA	Other			Sorghum bicolor (L.) Moench subsp. bicolor
PI 266927	Cellulosic	Photoperiod_Sensitive	India		Co. 1	Other			Sorghum bicolor (L.) Moench subsp. bicolor
PI 267573	Cellulosic	Photoperiod_Sensitive	Ethiopia	Durra	IS 2983	Other			Sorghum bicolor (L.) Moench subsp. bicolor
PI 273969	Sweet	Photoperiod_Insensitive	Ethiopia		MN 4578	Other			Sorghum bicolor (L.) Moench subsp. bicolor
PI 276837	Sweet	Photoperiod_Insensitive	Ethiopia	Durra-caudatum	IS 12661	Other		SAP-391	Sorghum bicolor (L.) Moench subsp. bicolor
PI 291246	Sweet	Photoperiod_Insensitive	Jamaica	Durra	IS 2253	Other			Sorghum bicolor (L.) Moench subsp. bicolor
PI 300118	Cellulosic	Photoperiod_Insensitive	South Africa		294				Sorghum bicolor (L.) Moench subsp. verticilliflorum (Steud.) de Wet ex Wiersema & J. Dahlb.
PI 300119	Cellulosic	Photoperiod_Insensitive	South Africa		329				Sorghum bicolor (L.) Moench subsp. verticilliflorum (Steud.) de Wet ex Wiersema & J. Dahlb.
PI 302221			USSR, Union of Soviet Socialist Republics		A-6129				Sorghum bicolor (L.) Moench subsp. drummondii (Steud.) de Wet ex Davidse
PI 302252	Sweet	Photoperiod_Insensitive	China		A-6062				Sorghum bicolor (L.) Moench subsp. bicolor
PI 303658	Sweet	Photoperiod_Insensitive	Sudan		Nerum Boer	Other			Sorghum bicolor (L.) Moench subsp. bicolor
PI 329256	Sweet	Photoperiod_Sensitive	Ethiopia		IS 11014	Other			Sorghum bicolor (L.) Moench subsp. bicolor
PI 329286	Cellulosic	Photoperiod_Sensitive	Ethiopia		IS 11044	Other			Sorghum bicolor (L.) Moench subsp. bicolor
PI 329299	Cellulosic	Photoperiod_Sensitive	Ethiopia		IS 11057	Other			Sorghum bicolor (L.) Moench subsp. bicolor
PI 329300	Cellulosic	Photoperiod_Sensitive	Ethiopia		IS 11058				Sorghum bicolor (L.) Moench subsp. bicolor
PI 329301	Sweet	Photoperiod_Sensitive	Ethiopia		IS 11059				Sorghum bicolor (L.) Moench subsp. bicolor
PI 329310	Sweet	Photoperiod_Sensitive	Ethiopia		IS 11068	Other			Sorghum bicolor (L.) Moench subsp. bicolor
PI 329319	Cellulosic	Photoperiod_Sensitive	Ethiopia		IS 11077	Other			Sorghum bicolor (L.) Moench subsp. bicolor
PI 329326	Cellulosic	Photoperiod_Sensitive	Ethiopia		IS 11083	Other			Sorghum bicolor (L.) Moench subsp. bicolor
PI 329333	Cellulosic	Photoperiod_Sensitive	Ethiopia		IS 11090	Other			Sorghum bicolor (L.) Moench subsp. bicolor
PI 329338	Cellulosic	Photoperiod_Insensitive	Ethiopia		IS 11096	Other			Sorghum bicolor (L.) Moench subsp. bicolor
PI 329351	Cellulosic	Photoperiod_Sensitive	Ethiopia		IS 11108	Other			Sorghum bicolor (L.) Moench subsp. bicolor
PI 329394	Sweet	Photoperiod_Sensitive	Ethiopia		IS 11151	Other			Sorghum bicolor (L.) Moench subsp. bicolor
PI 329403	Sweet	Photoperiod_Sensitive	Ethiopia		IS 11160		Durra type		Sorghum bicolor (L.) Moench subsp. bicolor
PI 329435	Cellulosic	Photoperiod_Insensitive	Ethiopia		Mashila			SAP-87	Sorghum bicolor (L.) Moench subsp. bicolor
PI 329440	Sweet	Photoperiod_Insensitive	Ethiopia		Mashila	Other		SAP-88	Sorghum bicolor (L.) Moench subsp. bicolor
PI 329465	Sweet	Photoperiod_Sensitive	Ethiopia		IS 11222	Other			Sorghum bicolor (L.) Moench subsp. bicolor
PI 329466	Cellulosic	Photoperiod_Insensitive	Ethiopia		IS 11223				Sorghum bicolor (L.) Moench subsp. bicolor
PI 329471	Cellulosic	Photoperiod_Sensitive	Ethiopia		IS 11228	Other			Sorghum bicolor (L.) Moench subsp. bicolor
PI 329478	Cellulosic	Photoperiod_Sensitive	Ethiopia		IS 11234				Sorghum bicolor (L.) Moench subsp. bicolor
PI 329480	Cellulosic	Photoperiod_Sensitive	Ethiopia		IS 11236	Other			Sorghum bicolor (L.) Moench subsp. bicolor
PI 329501	Cellulosic	Photoperiod_Sensitive	Ethiopia		IS 11257				Sorghum bicolor (L.) Moench subsp. bicolor
PI 329506	Cellulosic	Photoperiod_Sensitive	Ethiopia		IS 11260	Other			Sorghum bicolor (L.) Moench subsp. bicolor
PI 329510	Cellulosic	Photoperiod_Sensitive	Ethiopia		IS 11264	Other			Sorghum bicolor (L.) Moench subsp. bicolor
PI 329511	Sweet	Photoperiod_Sensitive	Ethiopia		IS 11265	Other			Sorghum bicolor (L.) Moench subsp. bicolor
PI 329517	Cellulosic	Photoperiod_Sensitive	Ethiopia		IS 11269	Other			Sorghum bicolor (L.) Moench subsp. bicolor
PI 329518	Cellulosic	Photoperiod_Sensitive	Ethiopia		IS 11270	Other			Sorghum bicolor (L.) Moench subsp. bicolor
PI 329519	Cellulosic	Photoperiod_Sensitive	Ethiopia		IS 11271	Other			Sorghum bicolor (L.) Moench subsp. bicolor
PI 329545	Cellulosic	Photoperiod_Sensitive	Ethiopia		IS 11297				Sorghum bicolor (L.) Moench subsp. bicolor
PI 329546	Cellulosic	Photoperiod_Sensitive	Ethiopia		IS 11298				Sorghum bicolor (L.) Moench subsp. bicolor
PI 329550	Cellulosic	Photoperiod_Sensitive	Ethiopia		IS 11301				Sorghum bicolor (L.) Moench subsp. bicolor
PI 329551	Cellulosic	Photoperiod_Sensitive	Ethiopia		IS 11302				Sorghum bicolor (L.) Moench subsp. bicolor
PI 329554	Cellulosic	Photoperiod_Sensitive	Ethiopia		IS 11305				Sorghum bicolor (L.) Moench subsp. bicolor
PI 329569	Cellulosic	Photoperiod_Sensitive	Ethiopia		IS 11320	Other			Sorghum bicolor (L.) Moench subsp. bicolor
PI 329570	Cellulosic	Photoperiod_Sensitive	Ethiopia		IS 11321	Other			Sorghum bicolor (L.) Moench subsp. bicolor
PI 329573	Cellulosic		Ethiopia		IS 11324				Sorghum bicolor (L.) Moench subsp. bicolor
PI 329583	Cellulosic	Photoperiod_Sensitive	Ethiopia		IS 11334				Sorghum bicolor (L.) Moench subsp. bicolor
PI 329584	Cellulosic	Photoperiod_Sensitive	Ethiopia		IS 11335	Other			Sorghum bicolor (L.) Moench subsp. bicolor
PI 329585	Cellulosic	Photoperiod_Sensitive	Ethiopia		IS 11336	Other			Sorghum bicolor (L.) Moench subsp. bicolor
PI 329605	Cellulosic	Photoperiod_Sensitive	Ethiopia		IS 11350	Other			Sorghum bicolor (L.) Moench subsp. bicolor
PI 329614	Cellulosic	Photoperiod_Sensitive	Ethiopia		IS 11359				Sorghum bicolor (L.) Moench subsp. bicolor
PI 329615	Cellulosic	Photoperiod_Sensitive	Ethiopia		IS 11360				Sorghum bicolor (L.) Moench subsp. bicolor
PI 329617	Cellulosic	Photoperiod_Sensitive	Ethiopia		IS 11362				Sorghum bicolor (L.) Moench subsp. bicolor
PI 329644	Cellulosic	Photoperiod_Sensitive	Ethiopia		IS 11389				Sorghum bicolor (L.) Moench subsp. bicolor
PI 329645	Sweet	Photoperiod_Sensitive	Ethiopia		IS 11390				Sorghum bicolor (L.) Moench subsp. bicolor
PI 329646	Cellulosic	Photoperiod_Sensitive	Ethiopia		IS 11391				Sorghum bicolor (L.) Moench subsp. bicolor
PI 329673	Cellulosic	Photoperiod_Sensitive	Ethiopia		IS 11414				Sorghum bicolor (L.) Moench subsp. bicolor
PI 329699	Sweet	Photoperiod_Insensitive	Ethiopia		IS 11435				Sorghum bicolor (L.) Moench subsp. bicolor
PI 329702	Cellulosic	Photoperiod_Sensitive	Ethiopia		IS 11438				Sorghum bicolor (L.) Moench subsp. bicolor
PI 329710	Cellulosic	Photoperiod_Sensitive	Ethiopia		IS 11446				Sorghum bicolor (L.) Moench subsp. bicolor
PI 329711	Cellulosic	Photoperiod_Sensitive	Ethiopia		IS 11447				Sorghum bicolor (L.) Moench subsp. bicolor
PI 329841	Sweet	Photoperiod_Sensitive	Ethiopia		IS 11572				Sorghum bicolor (L.) Moench subsp. bicolor
PI 329843	Cellulosic	Photoperiod_Sensitive	Ethiopia		IS 11574		S. subglabrescens type		Sorghum bicolor (L.) Moench subsp. bicolor
PI 329864	Sweet	Photoperiod_Insensitive	Ethiopia		IS 11593				Sorghum bicolor (L.) Moench subsp. bicolor
PI 329865	Cellulosic	Photoperiod_Sensitive	Ethiopia		IS 11594				Sorghum bicolor (L.) Moench subsp. bicolor
PI 330122	Grain		Ethiopia		IS 11842		Durra type		Sorghum bicolor (L.) Moench subsp. bicolor
PI 330167	Sweet	Photoperiod_Sensitive	Ethiopia		IS 11887				Sorghum bicolor (L.) Moench subsp. bicolor
PI 330168	Cellulosic	Photoperiod_Sensitive	Ethiopia		IS 11888		Durra caudatum type		Sorghum bicolor (L.) Moench subsp. bicolor
PI 330169	Sweet	Photoperiod_Sensitive	Ethiopia		IS 11889				Sorghum bicolor (L.) Moench subsp. bicolor
PI 330181	Sweet	Photoperiod_Sensitive	Ethiopia		IS 11901				Sorghum bicolor (L.) Moench subsp. bicolor
PI 330182	Sweet	Photoperiod_Sensitive	Ethiopia		IS 11902				Sorghum bicolor (L.) Moench subsp. bicolor
PI 330184	Sweet	Photoperiod_Sensitive	Ethiopia		IS 11904		subglobescens type		Sorghum bicolor (L.) Moench subsp. bicolor
PI 330185	Sweet	Photoperiod_Sensitive	Ethiopia		IS 11905				Sorghum bicolor (L.) Moench subsp. bicolor
PI 330195	Sweet	Photoperiod_Sensitive	Ethiopia		IS 11913				Sorghum bicolor (L.) Moench subsp. bicolor
PI 330196	Cellulosic	Photoperiod_Sensitive	Ethiopia		IS 11914				Sorghum bicolor (L.) Moench subsp. bicolor
PI 330199	Sweet	Photoperiod_Insensitive	Ethiopia		IS 11917		Subglobescens type		Sorghum bicolor (L.) Moench subsp. bicolor
PI 330796	Cellulosic	Photoperiod_Sensitive	Ethiopia		IS 12080				Sorghum bicolor (L.) Moench subsp. bicolor
PI 330803	Cellulosic	Photoperiod_Sensitive	Ethiopia		IS 12087				Sorghum bicolor (L.) Moench subsp. bicolor
PI 330833	Cellulosic	Photoperiod_Sensitive	Ethiopia		IS 12117				Sorghum bicolor (L.) Moench subsp. bicolor
PI 330858	Cellulosic	Photoperiod_Sensitive	Ethiopia		IS 12142				Sorghum bicolor (L.) Moench subsp. bicolor
PI 337680	Cellulosic	Photoperiod_Sensitive	Ethiopia		IS 12252				Sorghum bicolor (L.) Moench subsp. bicolor
PI 337689	Cellulosic	Photoperiod_Insensitive	Ethiopia		IS 12261				Sorghum bicolor (L.) Moench subsp. bicolor
PI 365512	Cellulosic	Photoperiod_Insensitive	South Africa	Caudatum	1130	Other			Sorghum bicolor (L.) Moench subsp. verticilliflorum
PI 452542	Sweet	Photoperiod_Sensitive	Ethiopia	Durra	ETS 2029	Other			Sorghum bicolor (L.) Moench subsp. bicolor
PI 452544	Cellulosic	Photoperiod_Sensitive	Ethiopia	Durra	ETS 2030	Other			Sorghum bicolor (L.) Moench subsp. bicolor
PI 452619	Sweet	Photoperiod_Sensitive	Ethiopia	Guinea-durra	ETS 2069	Other			Sorghum bicolor (L.) Moench subsp. bicolor
PI 452692	Cellulosic	Photoperiod_Sensitive	Ethiopia	Durra	ETS 2110	Other			Sorghum bicolor (L.) Moench subsp. bicolor
PI 453106	Sweet	Photoperiod_Sensitive	Ethiopia	Durra	ETS 2306				Sorghum bicolor (L.) Moench subsp. bicolor
PI 453177	Cellulosic	Photoperiod_Sensitive	Ethiopia	Durra-bicolor	ETS 2341				Sorghum bicolor (L.) Moench subsp. bicolor
PI 453696			Ethiopia		ETS 2612				Sorghum bicolor (L.) Moench subsp. bicolor
PI 455217	Cellulosic	Photoperiod_Sensitive	Ethiopia	Durra	ETS 3455	Other			Sorghum bicolor (L.) Moench subsp. bicolor
PI 455280	Cellulosic	Photoperiod_Sensitive	Ethiopia	Durra-bicolor	ETS 3486				Sorghum bicolor (L.) Moench subsp. bicolor
PI 455301	Cellulosic	Photoperiod_Sensitive	Ethiopia	Kafir-durra	ETS 3493	Other			Sorghum bicolor (L.) Moench subsp. bicolor
PI 455307	Cellulosic	Photoperiod_Sensitive	Ethiopia	Durra-bicolor	ETS 3496	Other			Sorghum bicolor (L.) Moench subsp. bicolor
PI 474825			Yemen		IS 28175				Sorghum bicolor (L.) Moench subsp. bicolor
PI 506030	Cellulosic	Photoperiod_Sensitive	Togo	Guinea	Tchinlouol	Traditional cultivar/Landrace		GS82	Sorghum bicolor (L.) Moench subsp. bicolor
PI 511355	Sweet	Photoperiod_Insensitive			SMITH	Advanced/improved cultivar	MN4004/Mer. 61-11		Sorghum bicolor (L.) Moench subsp. bicolor
PI 513898	Cellulosic	Photoperiod_Sensitive	Benin	Guinea	Abokoun Wewe	Traditional cultivar/Landrace		Sg. 3961	Sorghum bicolor (L.) Moench subsp. bicolor
PI 514456	Cellulosic	Photoperiod_Sensitive	Senegal	Guinea	IS 20043	Traditional cultivar/Landrace		Sg. 1873	Sorghum bicolor (L.) Moench subsp. bicolor
PI 521019	Cellulosic	Photoperiod_Sensitive	Kenya	Durra-caudatum	Andiwo	Traditional cultivar/Landrace		097	Sorghum bicolor (L.) Moench subsp. bicolor
PI 521152	Cellulosic	Photoperiod_Sensitive	Kenya	Caudatum	Rachar	Traditional cultivar/Landrace		250	Sorghum bicolor (L.) Moench subsp. bicolor
PI 521280	Cellulosic	Photoperiod_Sensitive	Kenya	Durra-bicolor	Muya	Traditional cultivar/Landrace		403	Sorghum bicolor (L.) Moench subsp. bicolor
PI 521281	Cellulosic	Photoperiod_Sensitive	Kenya	Bicolor	Mwee	Traditional cultivar/Landrace		404	Sorghum bicolor (L.) Moench subsp. bicolor
PI 521290	Sweet	Photoperiod_Sensitive	Kenya	Guinea-bicolor	Bishehe	Traditional cultivar/Landrace		412	Sorghum bicolor (L.) Moench subsp. bicolor
PI 524475	Cellulosic	Photoperiod_Sensitive	Sudan	Caudatum-bicolor	Nvarkan	Traditional cultivar/Landrace		K 47	Sorghum bicolor (L.) Moench subsp. bicolor
PI 525049	Cellulosic	Photoperiod_Sensitive	Malawi	Guinea	MW 628	Traditional cultivar/Landrace			Sorghum bicolor (L.) Moench subsp. bicolor
PI 52606	Grain	Photoperiod_Insensitive	South Africa	Kafir	MN 2680				Sorghum bicolor (L.) Moench subsp. bicolor
PI 526905	Grain	Photoperiod_Insensitive	Zimbabwe	Caudatum	AMM 721	Traditional cultivar/Landrace		AMM 721	Sorghum bicolor (L.) Moench subsp. bicolor
PI 527045	Grain	Photoperiod_Insensitive	Zimbabwe	Caudatum	AMM 1051	Traditional cultivar/Landrace		AMM 1051	Sorghum bicolor (L.) Moench subsp. bicolor
PI 533752			South Africa		54.K.94(Witchweed res.)	Breeding/Research Material	SC 103/3/4-dwarf Martin B line/SC 103/2/SC 103*2/4/SC 103.	SC 103	Sorghum bicolor (L.) Moench subsp. bicolor
PI 533759	Grain		Zimbabwe		Mugbash 56/56	Breeding/Research Material	SC 118/3/4-dwarf Martin B line/SC 118/2/SC 118*2/4/SC 118.	SC 118	Sorghum bicolor (L.) Moench subsp. bicolor
PI 533792	Grain	Photoperiod_Insensitive	Ethiopia		No. 1 Gambela	Breeding/Research Material	SC 108/3/4-dwarf Martin B line/SC 108/2/SC 108*2/4/SC 108.	SC 108	Sorghum bicolor (L.) Moench subsp. bicolor
PI 533863			Chad		740 Oua Berr	Breeding/Research Material	SC 320/3/4-dwarf Martin B line/SC 320/2/SC 320*2/4/SC 320.	SC 320	Sorghum bicolor (L.) Moench subsp. bicolor
PI 533902	Grain	Photoperiod_Insensitive	Ethiopia		MN 604 (preconverted)	Breeding/Research Material	SC 6/3/4-dwarf Martin B line/SC 6/2/SC 6*2/4/SC 6	SC 6	Sorghum bicolor (L.) Moench subsp. bicolor
PI 533964	Grain		Sudan		IS 2586C	Breeding/Research Material	SC 803/3/4-dwarf Martin B line/SC 803/2/SC 803*2/4/SC 803	SAP-331	Sorghum bicolor (L.) Moench subsp. bicolor
PI 533998	Grain	Photoperiod_Insensitive			Brawley	Breeding/Research Material	SC 949/3/4-dwarf Martin B line/SC 949/2/SC 949*2/4/SC 949	SC 949	Sorghum bicolor (L.) Moench subsp. bicolor
PI 534047			Sudan		IS 7013C	Breeding/Research Material		SAP-423	Sorghum bicolor (L.) Moench subsp. bicolor
PI 534120	Grain	Photoperiod_Insensitive	Ethiopia		MN 605 (preconverted)	Breeding/Research Material	SC 7/3/4-dwarf Martin B line/SC 7/2/SC 7*2/4/SC 7.	SC 7	Sorghum bicolor (L.) Moench subsp. bicolor
PI 534157			Ethiopia		IS 12661C	Breeding/Research Material	SC 170/3/4-dwarf Martin B line/SC 170/2/SC 170*2/4/SC 170	SC 170	Sorghum bicolor (L.) Moench subsp. bicolor
PI 534165	Grain	Photoperiod_Insensitive	Sudan		Kalati Consa	Breeding/Research Material	SC 972/3/4-dwarf Martin B line/SC 972/2/SC 972*2/4/SC 972	SC 972	Sorghum bicolor (L.) Moench subsp. bicolor
PI 535783	Sweet	Photoperiod_Insensitive			N98	Breeding/Research Material	AN39/2/4*N4692/Rio/3/Waconia/4/Fremont. Composite of 4 F6 sorghum lines		Sorghum bicolor (L.) Moench subsp. bicolor
PI 535785	Sweet	Photoperiod_Insensitive			N100	Breeding/Research Material	Waconia /Wray, F7 sorghum Selection		Sorghum bicolor (L.) Moench subsp. bicolor
PI 535792	Grain	Photoperiod_Insensitive			N107	Breeding/Research Material	Bloomless Redlan (BRedlan bm1)/Brown midrib Redlan (BRedlan bmr-6). F6 sorghum plants with bloom and green midrib crossed with ARedlan for A- amd B-lines		Sorghum bicolor (L.) Moench subsp. bicolor
PI 535793	Sweet	Photoperiod_Insensitive			N108	Breeding/Research Material	Saccharum-Sorgo		Sorghum bicolor (L.) Moench subsp. bicolor
PI 535794	Grain	Photoperiod_Insensitive			N109	Breeding/Research Material	White Collier/Grain Sorghum Line		Sorghum bicolor (L.) Moench subsp. bicolor
PI 535795	Sweet	Photoperiod_Insensitive			N110	Breeding/Research Material	Red X		Sorghum bicolor (L.) Moench subsp. bicolor
PI 535796	Sweet	Photoperiod_Insensitive			N111	Breeding/Research Material	Selection from Waconia.		Sorghum bicolor (L.) Moench subsp. bicolor
PI 540518	Cellulosic	Photoperiod_Insensitive	Botswana		SEGAOLANE	Advanced/improved cultivar			Sorghum bicolor (L.) Moench subsp. bicolor
PI 542718	Grain	Photoperiod_Insensitive	China		SAN CHI SAN	Breeding/Research Material		SAP-123	Sorghum bicolor (L.) Moench subsp. bicolor
PI 550604	Grain	Photoperiod_Insensitive	USSR, Union of Soviet Socialist Republics	Caudatum	ZERNOGRAPSKOE 100	Breeding/Research Material		VIR 9971	Sorghum bicolor (L.) Moench subsp. bicolor
PI 552851	Sweet	Photoperiod_Sensitive			7035S	Breeding/Research Material	Wisconsin 106 sudangrass/Sweet 372 sudangrass		Sorghum bicolor (L.) Moench subsp. bicolor
PI 561072					A/BTxARG-1	Breeding/Research Material	((MB807*BTx624) Bulk F1)-5-5-1-2-bk-bk-1-bk A1 cytoplasm with 5 backcrosses	SAP-40	Sorghum bicolor (L.) Moench subsp. bicolor
PI 562717	Cellulosic	Photoperiod_Insensitive	US	Bicolor	PERENNIAL SWEET SUDAN	Advanced/improved cultivar			Sorghum bicolor (L.) Moench subsp. bicolor
PI 562732	Sweet	Photoperiod_Sensitive	Mexico	Durra-caudatum	LGV 88-1 (DWARF)	Advanced/improved cultivar			Sorghum bicolor (L.) Moench subsp. bicolor
PI 562781	Cellulosic	Photoperiod_Sensitive	Mali	Guinea	IS 3869	Traditional cultivar/Landrace			Sorghum bicolor (L.) Moench subsp. bicolor
PI 562897	Cellulosic	Photoperiod_Sensitive	Burkina Faso	Guinea	FARAKO-BA	Advanced/improved cultivar			Sorghum bicolor (L.) Moench subsp. bicolor
PI 562970	Cellulosic	Photoperiod_Sensitive	Nigeria	Guinea	FARAFARA	Advanced/improved cultivar			Sorghum bicolor (L.) Moench subsp. bicolor
PI 562971	Cellulosic	Photoperiod_Sensitive	Nigeria	Guinea	FARAFARA	Advanced/improved cultivar			Sorghum bicolor (L.) Moench subsp. bicolor
PI 562981	Cellulosic	Photoperiod_Sensitive	Nigeria	Guinea	EKA OR OKA BABA	Advanced/improved cultivar			Sorghum bicolor (L.) Moench subsp. bicolor
PI 562982	Cellulosic	Photoperiod_Sensitive	Nigeria	Guinea	EKA OR OKA BABA	Advanced/improved cultivar			Sorghum bicolor (L.) Moench subsp. bicolor
PI 562990	Cellulosic	Photoperiod_Sensitive	Nigeria	Guinea	MURBAN GANGAU	Advanced/improved cultivar			Sorghum bicolor (L.) Moench subsp. bicolor
PI 562991	Cellulosic	Photoperiod_Sensitive	Nigeria	Guinea	GIWA	Advanced/improved cultivar			Sorghum bicolor (L.) Moench subsp. bicolor
PI 562994	Cellulosic	Photoperiod_Sensitive	Nigeria	Guinea	HANA MATA BURKA	Advanced/improved cultivar			Sorghum bicolor (L.) Moench subsp. bicolor
PI 562997	Cellulosic	Photoperiod_Sensitive	Nigeria	Guinea-caudatum	EKPAN DZUNGI	Advanced/improved cultivar			Sorghum bicolor (L.) Moench subsp. bicolor
PI 562998	Cellulosic	Photoperiod_Sensitive	Nigeria	Guinea	MASUNGI	Advanced/improved cultivar			Sorghum bicolor (L.) Moench subsp. bicolor
PI 563002	Cellulosic	Photoperiod_Sensitive	Nigeria	Guinea	EKPAN DZURUGI	Advanced/improved cultivar			Sorghum bicolor (L.) Moench subsp. bicolor
PI 563009	Cellulosic	Photoperiod_Sensitive	Nigeria	Guinea-caudatum	IS 7739	Traditional cultivar/Landrace			Sorghum bicolor (L.) Moench subsp. bicolor
PI 563020	Cellulosic	Photoperiod_Sensitive	Nigeria	Guinea	OKA FUNFUN	Advanced/improved cultivar			Sorghum bicolor (L.) Moench subsp. bicolor
PI 563021	Cellulosic	Photoperiod_Sensitive	Nigeria	Guinea	TAPASOHIRA	Advanced/improved cultivar			Sorghum bicolor (L.) Moench subsp. bicolor
PI 563022	Cellulosic	Photoperiod_Sensitive	Nigeria	Guinea	ESSTENE	Advanced/improved cultivar			Sorghum bicolor (L.) Moench subsp. bicolor
PI 563032	Sweet	Photoperiod_Insensitive	Japan	Bicolor	COLLIER 706C	Advanced/improved cultivar			Sorghum bicolor (L.) Moench subsp. bicolor
PI 563196	Cellulosic	Photoperiod_Sensitive	Kenya	Guinea-caudatum	IS 9128	Traditional cultivar/Landrace			Sorghum bicolor (L.) Moench subsp. bicolor
PI 563329	Sweet	Photoperiod_Sensitive	Ethiopia	Durra-caudatum	IS 10005	Traditional cultivar/Landrace			Sorghum bicolor (L.) Moench subsp. bicolor
PI 563332	Cellulosic	Photoperiod_Sensitive	Ethiopia	Durra	IS 10015	Traditional cultivar/Landrace			Sorghum bicolor (L.) Moench subsp. bicolor
PI 563338	Cellulosic	Photoperiod_Sensitive	Burkina Faso	Guinea	IS 10105	Traditional cultivar/Landrace			Sorghum bicolor (L.) Moench subsp. bicolor
PI 563348	Cellulosic	Photoperiod_Sensitive	Burkina Faso	Guinea	IS 10162	Traditional cultivar/Landrace			Sorghum bicolor (L.) Moench subsp. bicolor
PI 563350	Cellulosic	Photoperiod_Sensitive	Burkina Faso	Guinea	IS 10168	Traditional cultivar/Landrace			Sorghum bicolor (L.) Moench subsp. bicolor
PI 563355	Cellulosic	Photoperiod_Sensitive	Burkina Faso	Guinea-caudatum	BOLOUNGOU	Advanced/improved cultivar			Sorghum bicolor (L.) Moench subsp. Bicolor
PI 564163	Grain	Photoperiod_Insensitive	US		Btx623	Advanced/improved cultivar		SAP-32	Sorghum bicolor (L.) Moench subsp. Bicolor
PI 566819	Sweet	Photoperiod_Insensitive			DELLA	Advanced/improved cultivar	ATx622/2*Dale	SAP-52	Sorghum bicolor (L.) Moench subsp. bicolor
PI 568717	Cellulosic	Photoperiod_Sensitive		Durra-caudatum	MRV-106	Traditional cultivar/Landrace			Sorghum bicolor (L.) Moench subsp. bicolor
PI 569097	Cellulosic	Photoperiod_Sensitive	Sudan	Durra	IS 19073	Traditional cultivar/Landrace			Sorghum bicolor (L.) Moench subsp. bicolor
PI 569148	Sweet	Photoperiod_Sensitive	Sudan	Durra-bicolor	IS 19124	Traditional cultivar/Landrace			Sorghum bicolor (L.) Moench subsp. bicolor
PI 569244	Sweet	Photoperiod_Insensitive	Sudan	Durra-caudatum	IS 19221	Traditional cultivar/Landrace			Sorghum bicolor (L.) Moench subsp. bicolor
PI 569264	Cellulosic	Photoperiod_Sensitive	Sudan	Caudatum-bicolor	IS 19242	Traditional cultivar/Landrace			Sorghum bicolor (L.) Moench subsp. bicolor
PI 569416	Cellulosic	Photoperiod_Sensitive		Caudatum	DALA	Traditional cultivar/Landrace			Sorghum bicolor (L.) Moench subsp. bicolor
PI 569418	Cellulosic	Photoperiod_Sensitive		Guinea-caudatum	LOTORI	Traditional cultivar/Landrace			Sorghum bicolor (L.) Moench subsp. bicolor
PI 569419	Cellulosic	Photoperiod_Sensitive		Caudatum	DERI	Traditional cultivar/Landrace			Sorghum bicolor (L.) Moench subsp. bicolor
PI 569420	Cellulosic	Photoperiod_Sensitive		Guinea-caudatum	GASSABI	Traditional cultivar/Landrace			Sorghum bicolor (L.) Moench subsp. bicolor
PI 569422	Cellulosic	Photoperiod_Sensitive		Caudatum	NYARANGO	Traditional cultivar/Landrace			Sorghum bicolor (L.) Moench subsp. bicolor
PI 569423	Cellulosic	Photoperiod_Sensitive		Guinea-caudatum	KYIKA (CHYIKA)	Traditional cultivar/Landrace			Sorghum bicolor (L.) Moench subsp. bicolor
PI 569425	Cellulosic	Photoperiod_Sensitive		Caudatum	AKEE (KEJ)	Traditional cultivar/Landrace			Sorghum bicolor (L.) Moench subsp. bicolor
PI 569427	Cellulosic	Photoperiod_Sensitive		Caudatum	MABORE	Traditional cultivar/Landrace			Sorghum bicolor (L.) Moench subsp. bicolor
PI 569433	Cellulosic	Photoperiod_Sensitive		Caudatum	CHEKOO	Traditional cultivar/Landrace			Sorghum bicolor (L.) Moench subsp. bicolor
PI 569435	Cellulosic	Photoperiod_Sensitive		Guinea-caudatum	KAVANGA	Traditional cultivar/Landrace			Sorghum bicolor (L.) Moench subsp. bicolor
PI 569443	Cellulosic	Photoperiod_Sensitive		Kafir-caudatum	BELL	Traditional cultivar/Landrace			Sorghum bicolor (L.) Moench subsp. bicolor
PI 569445	Cellulosic	Photoperiod_Sensitive		Guinea-caudatum	MORO	Traditional cultivar/Landrace			Sorghum bicolor (L.) Moench subsp. bicolor
PI 569446	Cellulosic	Photoperiod_Sensitive		Guinea-caudatum	DERE	Traditional cultivar/Landrace	Sorghum bicolor (L.) Moench subsp. bicolor		Sorghum bicolor (L.) Moench subsp. bicolor
PI 569447	Cellulosic	Photoperiod_Sensitive		Caudatum	NYARANGO	Traditional cultivar/Landrace			Sorghum bicolor (L.) Moench subsp. bicolor
PI 569453	Cellulosic	Photoperiod_Sensitive		Guinea-caudatum	KELE	Traditional cultivar/Landrace			Sorghum bicolor (L.) Moench subsp. bicolor
PI 569454	Cellulosic	Photoperiod_Sensitive		Guinea-caudatum	DIMERI	Traditional cultivar/Landrace			Sorghum bicolor (L.) Moench subsp. bicolor
PI 569455	Cellulosic	Photoperiod_Sensitive		Guinea-caudatum	LORYERYE	Traditional cultivar/Landrace			Sorghum bicolor (L.) Moench subsp. bicolor
PI 569457	Cellulosic	Photoperiod_Sensitive		Caudatum	MOBIOR	Traditional cultivar/Landrace			Sorghum bicolor (L.) Moench subsp. bicolor
PI 569458	Cellulosic	Photoperiod_Sensitive		Caudatum	NVARKHAN	Traditional cultivar/Landrace			Sorghum bicolor (L.) Moench subsp. bicolor
PI 569459	Cellulosic	Photoperiod_Sensitive		Caudatum	LUWAIAH	Traditional cultivar/Landrace			Sorghum bicolor (L.) Moench subsp. bicolor
PI 569460	Cellulosic	Photoperiod_Sensitive		Caudatum	REKA	Traditional cultivar/Landrace			Sorghum bicolor (L.) Moench subsp. bicolor
PI 569465	Cellulosic	Photoperiod_Sensitive		Caudatum	KECH	Traditional cultivar/Landrace			Sorghum bicolor (L.) Moench subsp. bicolor
PI 569886	Cellulosic	Photoperiod_Sensitive		Guinea-caudatum	IS 22440	Traditional cultivar/Landrace			Sorghum bicolor (L.) Moench subsp. bicolor
PI 570031	Cellulosic	Photoperiod_Sensitive		Guinea-caudatum	IS 22809	Traditional cultivar/Landrace			Sorghum bicolor (L.) Moench subsp. bicolor
PI 570038	Cellulosic	Photoperiod_Sensitive		Kafir-caudatum	IS 22816	Traditional cultivar/Landrace			Sorghum bicolor (L.) Moench subsp. bicolor
PI 570039	Cellulosic	Photoperiod_Sensitive		Guinea-caudatum	IS 22817	Traditional cultivar/Landrace			Sorghum bicolor (L.) Moench subsp. bicolor
PI 570042	Cellulosic	Photoperiod_Sensitive		Guinea-caudatum	IS 22820	Traditional cultivar/Landrace			Sorghum bicolor (L.) Moench subsp. bicolor
PI 570053	Cellulosic	Photoperiod_Sensitive		Caudatum	IS 22831	Traditional cultivar/Landrace			Sorghum bicolor (L.) Moench subsp. bicolor
PI 570071	Cellulosic	Photoperiod_Sensitive		Guinea-caudatum	IS 22849	Traditional cultivar/Landrace			Sorghum bicolor (L.) Moench subsp. bicolor
PI 570073	Cellulosic	Photoperiod_Sensitive		Guinea-caudatum	IS 22851	Traditional cultivar/Landrace			Sorghum bicolor (L.) Moench subsp. bicolor
PI 570074	Cellulosic	Photoperiod_Sensitive		Guinea-caudatum	IS 22852	Traditional cultivar/Landrace			Sorghum bicolor (L.) Moench subsp. bicolor
PI 570075	Cellulosic	Photoperiod_Sensitive		Guinea-caudatum	IS 22853	Traditional cultivar/Landrace			Sorghum bicolor (L.) Moench subsp. bicolor
PI 570076	Cellulosic	Photoperiod_Sensitive		Guinea	IS 22854	Traditional cultivar/Landrace			Sorghum bicolor (L.) Moench subsp. bicolor
PI 570085	Cellulosic	Photoperiod_Sensitive		Guinea-caudatum	IS 22863	Traditional cultivar/Landrace			Sorghum bicolor (L.) Moench subsp. bicolor
PI 570087	Cellulosic	Photoperiod_Sensitive		Guinea-caudatum	IS 22865	Traditional cultivar/Landrace			Sorghum bicolor (L.) Moench subsp. bicolor
PI 570090	Cellulosic	Photoperiod_Sensitive		Guinea-caudatum	IS 22868	Traditional cultivar/Landrace			Sorghum bicolor (L.) Moench subsp. bicolor
PI 570091	Cellulosic	Photoperiod_Sensitive		Guinea-caudatum	IS 22869	Traditional cultivar/Landrace			Sorghum bicolor (L.) Moench subsp. bicolor
PI 570096	Cellulosic	Photoperiod_Sensitive		Guinea-caudatum	IS 22874	Traditional cultivar/Landrace			Sorghum bicolor (L.) Moench subsp. bicolor
PI 570106	Cellulosic	Photoperiod_Sensitive		Guinea-caudatum	IS 22884	Traditional cultivar/Landrace			Sorghum bicolor (L.) Moench subsp. bicolor
PI 570110	Cellulosic	Photoperiod_Sensitive		Guinea-caudatum	IS 22888	Traditional cultivar/Landrace			Sorghum bicolor (L.) Moench subsp. bicolor
PI 570114	Cellulosic	Photoperiod_Sensitive		Guinea	IS 22892	Traditional cultivar/Landrace			Sorghum bicolor (L.) Moench subsp. bicolor
PI 570145	Cellulosic	Photoperiod_Sensitive		Guinea-caudatum	IS 22923	Traditional cultivar/Landrace			Sorghum bicolor (L.) Moench subsp. bicolor
PI 570371	Cellulosic	Photoperiod_Sensitive		Guinea-caudatum	IS 25045	Traditional cultivar/Landrace			Sorghum bicolor (L.) Moench subsp. bicolor
PI 570373	Cellulosic	Photoperiod_Sensitive	Sudan	Guinea-caudatum	ODAKA	Traditional cultivar/Landrace			Sorghum bicolor (L.) Moench subsp. bicolor
PI 570388	Sweet	Photoperiod_Sensitive	Sudan	Guinea	BAHONGER-UKILIR	Traditional cultivar/Landrace			Sorghum bicolor (L.) Moench subsp. bicolor
PI 570393	Cellulosic	Photoperiod_Sensitive	Sudan	Caudatum	IS 26849	Traditional cultivar/Landrace			Sorghum bicolor (L.) Moench subsp. bicolor
PI 570400	Cellulosic	Photoperiod_Sensitive		Guinea-caudatum	LABALWA	Traditional cultivar/Landrace			Sorghum bicolor (L.) Moench subsp. bicolor
PI 570431	Sweet	Photoperiod_Sensitive		Durra	IS 27035	Traditional cultivar/Landrace			Sorghum bicolor (L.) Moench subsp. bicolor
PI 573193	Cellulosic	Photoperiod_Sensitive		Caudatum	A/7	Traditional cultivar/Landrace			Sorghum bicolor (L.) Moench subsp. bicolor
PI 576366			India		Jowar Red Jankinagar	Breeding/Research Material		SC 624	Sorghum bicolor (L.) Moench subsp. bicolor
PI 576399	Sweet	Photoperiod_Insensitive	Sudan		IS 3515C	Breeding/Research Material		SC 323	Sorghum bicolor (L.) Moench subsp. bicolor
PI 576401	Grain	Photoperiod_Insensitive	India		IS 4307C	Breeding/Research Material		SC 1085	Sorghum bicolor (L.) Moench subsp. bicolor
PI 583832	Sweet	Photoperiod_Insensitive			TOP 76-6	Advanced/improved cultivar	Selection from F2 progeny of (Mer. 60-2 x Brandes). Mer. 60-2 parentage (PI 154844 x PI 152967). Brandes parentage (Collier 706-C x PI 154844).		Sorghum bicolor (L.) Moench subsp. bicolor
PI 585406	Cellulosic	Photoperiod_Insensitive	Nigeria	Guinea	IS 24800	Traditional cultivar/Landrace			Sorghum bicolor (L.) Moench subsp. bicolor
PI 585448	Cellulosic	Photoperiod_Sensitive	Ghana	Guinea	IS 25050	Traditional cultivar/Landrace			Sorghum bicolor (L.) Moench subsp. bicolor
PI 585452	Cellulosic	Photoperiod_Sensitive	Ghana	Guinea	IS 25059	Traditional cultivar/Landrace			Sorghum bicolor (L.) Moench subsp. bicolor
PI 585454	Cellulosic	Photoperiod_Sensitive	Ghana	Guinea	IS 25061	Traditional cultivar/Landrace			Sorghum bicolor (L.) Moench subsp. bicolor
PI 585461	Cellulosic	Photoperiod_Sensitive	Ghana	Guinea	IS 25086	Traditional cultivar/Landrace			Sorghum bicolor (L.) Moench subsp. bicolor
PI 585467	Cellulosic	Photoperiod_Sensitive	Ghana	Guinea	IS 25108	Traditional cultivar/Landrace			Sorghum bicolor (L.) Moench subsp. bicolor
PI 585577	Cellulosic	Photoperiod_Sensitive	Burundi	Durra-caudatum	IS 25514	Traditional cultivar/Landrace			Sorghum bicolor (L.) Moench subsp. bicolor
PI 585608	Cellulosic	Photoperiod_Sensitive	Rwanda	Caudatum	IS 25576	Traditional cultivar/Landrace			Sorghum bicolor (L.) Moench subsp. bicolor
PI 585961	Cellulosic	Photoperiod_Sensitive	Togo	Guinea	IS 26386	Traditional cultivar/Landrace			Sorghum bicolor (L.) Moench subsp. bicolor
PI 585966	Cellulosic	Photoperiod_Sensitive	Togo	Guinea	DJOFELA	Traditional cultivar/Landrace			Sorghum bicolor (L.) Moench subsp. bicolor
PI 586435	Sweet	Photoperiod_Insensitive	Hungary	Guinea-kafir	SUGAR DRIP	Traditional cultivar/Landrace			Sorghum bicolor (L.) Moench subsp. bicolor
PI 586499	Sweet	Photoperiod_Insensitive	South Africa	Kafir-caudatum	IS 27900	Traditional cultivar/Landrace			Sorghum bicolor (L.) Moench subsp. bicolor
PI 586541	Sweet	Photoperiod_Insensitive	Australia	Caudatum-bicolor	TRACY	Advanced/improved cultivar			Sorghum bicolor (L.) Moench subsp. bicolor
PI 593916	Grain	Photoperiod_Insensitive			B3SC599-6-9188	Breeding/Research Material	IS17459 (Rio) BC1, F3 selection, and inbred 5+ generations (early maturity selection).		Sorghum bicolor (L.) Moench subsp. bicolor
PI 595699					SC 929	Breeding/Research Material	Photoperiod insensitive conversion of IS 1029 selected from the World Sorghum Collection.	SAP-340	Sorghum bicolor (L.) Moench subsp. bicolor
PI 595741					SC 1063	Breeding/Research Material	Photoperiod insensitive conversion of SC 1063 selected from the World Sorghum Collection.	SC 1063	Sorghum bicolor (L.) Moench subsp. bicolor
PI 606706					Tift 98bmrB1	Breeding/Research Material	Inbred Combine Kafir 60B was pollinated in 1976 with bmr mutant #12 from Purdue University. Selection for good agronomic plant type and 3-dwarf plant height continued for four generations when a uniform bmr 3-dwarf selection (82-5335) was pollinated in 1982 with BTx623. Forty F2 bmr plants were selected and advanced to the F4 generation. Tift 98bmrB1 was selected in the F4 when it was a morpholog…		Sorghum bicolor (L.) Moench subsp. bicolor
PI 619807	Sweet	Photoperiod_Sensitive	Uganda		IS 31047	Traditional cultivar/Landrace			Sorghum bicolor (L.) Moench subsp. bicolor
PI 619838	Cellulosic	Photoperiod_Sensitive	Uganda		IS 31083	Traditional cultivar/Landrace			Sorghum bicolor (L.) Moench subsp. bicolor
PI 620072	Cellulosic	Photoperiod_Sensitive	Uganda		IS 31384	Traditional cultivar/Landrace			Sorghum bicolor (L.) Moench subsp. bicolor
PI 620157	Cellulosic	Photoperiod_Sensitive	Uganda		IS 31475	Traditional cultivar/Landrace			Sorghum bicolor (L.) Moench subsp. bicolor
PI 629059					BTx2928	Breeding/Research Material	(RS4906 x BTx399) x RS4906).	SAP-24	Sorghum bicolor (L.) Moench subsp. bicolor
PI 63715	Sweet	Photoperiod_Insensitive	China	Kafir	SUMAC				Sorghum bicolor (L.) Moench subsp. bicolor
PI 641810	Sweet	Photoperiod_Insensitive			COLMAN (Y)				Sorghum bicolor (L.) Moench subsp. bicolor
PI 641815	Sweet	Photoperiod_Insensitive			EARLY FOLGER				Sorghum bicolor (L.) Moench subsp. bicolor
PI 641817	Sweet	Photoperiod_Insensitive			EARLY SUMAC				Sorghum bicolor (L.) Moench subsp. bicolor
PI 641821	Cellulosic	Photoperiod_Insensitive			HONEY DRIP				Sorghum bicolor (L.) Moench subsp. bicolor
PI 641824	Sweet	Photoperiod_Insensitive			KANSAS ORANGE			SAP-70	Sorghum bicolor (L.) Moench subsp. bicolor
PI 641829	Sweet	Photoperiod_Insensitive			MCLEAN				Sorghum bicolor (L.) Moench subsp. bicolor
PI 641830	Cellulosic	Photoperiod_Insensitive			MINNESOTA AMBER		Selection from Early Amber		Sorghum bicolor (L.) Moench subsp. bicolor
PI 641834	Sweet	Photoperiod_Insensitive			PLANTER				Sorghum bicolor (L.) Moench subsp. bicolor
PI 641835	Sweet	Photoperiod_Insensitive			REX		Selected from natural cross found in Link Hybrid (Sapling) and Amber sorgos		Sorghum bicolor (L.) Moench subsp. bicolor
PI 641850	Sweet	Photoperiod_Insensitive			WHITE AFRICAN				Sorghum bicolor (L.) Moench subsp. bicolor
PI 641860	Sweet	Photoperiod_Insensitive			COLLIER				Sorghum bicolor (L.) Moench subsp. bicolor
PI 641862	Sweet	Photoperiod_Insensitive			COLLIER				Sorghum bicolor (L.) Moench subsp. bicolor
PI 641892	Cellulosic	Photoperiod_Insensitive			SAPLING				Sorghum bicolor (L.) Moench subsp. bicolor
PI 641909	Cellulosic	Photoperiod_Insensitive	Sudan		Red Losinga				Sorghum bicolor (L.) Moench subsp. bicolor
PI 643008	Sweet	Photoperiod_Insensitive			MN 2751				Sorghum bicolor (L.) Moench subsp. bicolor
PI 643016	Sweet	Photoperiod_Sensitive			MN 2761				Sorghum bicolor (L.) Moench subsp. bicolor
PI 646242	Cellulosic	Photoperiod_Sensitive	Uganda		IS 30975				Sorghum bicolor (L.) Moench subsp. bicolor
PI 646251	Cellulosic	Photoperiod_Sensitive	Uganda		IS 31059				Sorghum bicolor (L.) Moench subsp. bicolor
PI 646266	Cellulosic	Photoperiod_Sensitive	Uganda		IS 31113				Sorghum bicolor (L.) Moench subsp. bicolor
PI 651491	Sweet	Photoperiod_Insensitive			BAILEY		Selected from F2 progeny of cross 'Wiley' x 'Tracy'.		Sorghum bicolor (L.) Moench subsp. bicolor
PI 651493	Sweet	Photoperiod_Insensitive			RAMADA		Selected from progeny of cross [Mer. 45-45 x P.I. 152967 (MN 1056)] x [P.I. 152965 (MN 1054) x P.I. 152971 (MN 1060)].		Sorghum bicolor (L.) Moench subsp. bicolor
PI 651495	Sweet	Photoperiod_Insensitive			DALE		Selection from progeny of 4th backcross between Tracy and MN960 with Tracy as recurrent parent.		Sorghum bicolor (L.) Moench subsp. bicolor
PI 651497	Sweet	Photoperiod_Insensitive			Theis	Advanced/improved cultivar	Selected from F2 progeny of the cross between Wiley/C.P. Special and PI 152965 (MN 1054)/Mer. 51-2 (White African)/PI 139466 (Mn 660)		Sorghum bicolor (L.) Moench subsp. bicolor
PI 653411	Sweet				M 81E		Selected from F2 progeny of cross Brawley x (Brawley x Rio).		Sorghum bicolor (L.) Moench subsp. bicolor
PI 653616	Sweet	Photoperiod_Insensitive			WRAY		Derived from F2 progeny of cross of selection from PI 152728 (Mer. 57-1) with Brawley x Rio.	SAP-377	Sorghum bicolor (L.) Moench subsp. bicolor
PI 653617	Sweet	Photoperiod_Insensitive			KELLER		Derived from F2 progeny of cross Mer. 50-1 x Rio.	SAP-73	Sorghum bicolor (L.) Moench subsp. bicolor
PI 655978	Grain	Photoperiod_Insensitive			Tx2737	Breeding/Research Material	Bulk from F4 rows of TAM2554/3/Tx2536//(Tx7000/SA7536-1)F3	SAP-110	Sorghum bicolor (L.) Moench subsp. bicolor
PI 655981	Cellulosic	Photoperiod_Insensitive	Mali		SAP-50			SAP-50	Sorghum bicolor (L.) Moench subsp. bicolor
PI 655986					CAPROCK		Derived from a milo x kafir cross.	SAP-41	Sorghum bicolor (L.) Moench subsp. bicolor
PI 655988					COMBINE KAFIR-60		Derived by crossing a double dwarf kafir selection to Texas Blackhul kafir & backcrossing an F2 selection from that cross to Texas Blackhul followed by selection for dbl dwarf ht, earliness & adapt. to combine harvesting.	SAP-47	Sorghum bicolor (L.) Moench subsp. bicolor
PI 655995					DEER	Advanced/improved cultivar	Derived from cross Rennells No. 11 and Illinois No. 1.	SAP-51	Sorghum bicolor (L.) Moench subsp. bicolor
PI 655996					RTx430		Derived from (Tx2536 crossed with SC0170-6-5-1-E2)-10- 4-4-1-4-X. 2 (in 'E2)' is a subscript. X represents one generation of selfing.	SAP-115	Sorghum bicolor (L.) Moench subsp. bicolor
PI 656015	Sweet	Photoperiod_Insensitive			Ajabsido	Advanced/improved cultivar		SAP-16	Sorghum bicolor (L.) Moench subsp. bicolor
PI 656020					BTx406	Breeding/Research Material		SAP-29	Sorghum bicolor (L.) Moench subsp. bicolor
PI 656023					Segaolane			SAP-354	Sorghum bicolor (L.) Moench subsp. bicolor
PI 656026	Grain	Photoperiod_Insensitive			SOBERANO	Advanced/improved cultivar		SAP-357	Sorghum bicolor (L.) Moench subsp. bicolor
PI 656030					58M	Breeding/Research Material		SAP-4	Sorghum bicolor (L.) Moench subsp. bicolor
PI 656035	Cellulosic	Photoperiod_Insensitive			El Mota	Advanced/improved cultivar		SAP-57	Sorghum bicolor (L.) Moench subsp. bicolor
PI 656044					Kuyuma	Advanced/improved cultivar		SAP-76	Sorghum bicolor (L.) Moench subsp. bicolor
PI 656051					MR732	Advanced/improved cultivar		SAP-85	Sorghum bicolor (L.) Moench subsp. bicolor
PI 656056	Grain				P850029	Breeding/Research Material		SAP-92	Sorghum bicolor (L.) Moench subsp. bicolor
PI 656065	Cellulosic	Photoperiod_Insensitive			Koro Kollo			SAP-388	Sorghum bicolor (L.) Moench subsp. bicolor
PI 673843
PI 92270	Sweet	Photoperiod_Insensitive	China	Mixed	MN 2740			163	Sorghum bicolor (L.) Moench subsp. bicolor
PI 563295	Sweet	Photoperiod_Insensitive	US		RIO	Advanced/improved cultivar			Sorghum bicolor (L.) Moench subsp. bicolor
