# Supplementary material for: Major impacts of widespread structural variation on sorghum
Source: HighWire-hosted journal article supplement (doi:10.1101/gr.278396.123), 2024-02-01
Supplement: Supplemental_Table_S2.xlsx [file Supplemental_Table_S2.xlsx]

## Sheet: Sheet1
Supplemental Table S2 Summary statistics of the 3 assembled sorghum genomes
Sample	Assembled genome size (bp)	N50 (bp)	Completeness (BUSCO)
PI 329545	733135057	70313630	C:94.0%[S:92.1%,D:1.9%],F:0.0%,M:6.0%,n:1614
PI 337680	734335703	70519240	C:94.0%[S:92.1%,D:1.9%],F:0.0%,M:6.0%,n:1614
PI 651495	743111630	71116866	C:94.5%[S:92.6%,D:1.9%],F:0.0%,M:5.5%,n:1614
