# Supplementary material for: Major impacts of widespread structural variation on sorghum
Source: HighWire-hosted journal article supplement (doi:10.1101/gr.278396.123), 2024-02-01
Supplement: Supplemental_Table_S3.xlsx [file Supplemental_Table_S3.xlsx]

## Sheet: Sheet1
Supplemental Table S3 43 representative cellulosic accessions
AccessionID	Type	Photoperiod Sensitivity	PC1	PC2	PC3
PI 330833	Cellulosic	Photoperiod_Sensitive	143.116	-25.6284	-56.5283
PI 329614	Cellulosic	Photoperiod_Sensitive	141.899	-24.3585	-49.8094
PI 329702	Cellulosic	Photoperiod_Sensitive	137.624	-26.3986	-52.1052
PI 330803	Cellulosic	Photoperiod_Sensitive	135.94	-24.217	-55.3552
PI 329573	Cellulosic	Unknown	135.331	-27.2868	-57.2927
PI 329583	Cellulosic	Photoperiod_Sensitive	134.401	-24.8174	-57.0675
PI 329550	Cellulosic	Photoperiod_Sensitive	134.19	-27.8675	-54.9955
PI 329501	Cellulosic	Photoperiod_Sensitive	133.695	-25.4384	-50.1888
PI 329478	Cellulosic	Photoperiod_Sensitive	132.654	-22.4078	-43.9462
PI 329644	Cellulosic	Photoperiod_Sensitive	132.248	-26.3675	-56.1866
PI 329554	Cellulosic	Photoperiod_Sensitive	130.225	-24.2055	-47.6768
PI 329673	Cellulosic	Photoperiod_Sensitive	129.679	-21.5415	-43.9534
PI 329615	Cellulosic	Photoperiod_Sensitive	127.711	-22.0229	-45.4651
PI 329646	Cellulosic	Photoperiod_Sensitive	124.225	-24.3165	-52.4931
PI 329843	Cellulosic	Photoperiod_Sensitive	117.253	-20.4417	-45.5653
PI 329518	Cellulosic	Photoperiod_Sensitive	115.764	-21.7754	-46.917
PI 329546	Cellulosic	Photoperiod_Sensitive	111.989	-19.5181	-35.5495
PI 330858	Cellulosic	Photoperiod_Sensitive	109.668	-17.5979	-35.7237
PI 329545	Cellulosic	Photoperiod_Sensitive	108.809	-17.9988	-36.9627
PI 453177	Cellulosic	Photoperiod_Sensitive	108.372	-5.53241	6.14903
PI 329551	Cellulosic	Photoperiod_Sensitive	106.194	-17.9306	-37.2319
PI 329519	Cellulosic	Photoperiod_Sensitive	105.103	-22.5772	-54.4422
PI 329605	Cellulosic	Photoperiod_Sensitive	100.381	-22.078	-50.7321
PI 329585	Cellulosic	Photoperiod_Sensitive	99.0159	-21.6034	-54.8419
PI 329617	Cellulosic	Photoperiod_Sensitive	98.3144	-14.1279	-32.3237
PI 455280	Cellulosic	Photoperiod_Sensitive	96.7724	-1.43428	7.9703
PI 330196	Cellulosic	Photoperiod_Sensitive	95.2794	-6.57895	-4.28707
PI 329326	Cellulosic	Photoperiod_Sensitive	92.7189	-20.0388	-53.2606
PI 329584	Cellulosic	Photoperiod_Sensitive	90.9779	-22.2163	-54.0496
PI 329319	Cellulosic	Photoperiod_Sensitive	90.2079	-20.5469	-44.5565
PI 337680	Cellulosic	Photoperiod_Sensitive	89.0705	-11.4089	6.74312
PI 329471	Cellulosic	Photoperiod_Sensitive	85.0555	-21.5787	-52.7582
PI 152727	Cellulosic	Photoperiod_Sensitive	82.5013	-2.25299	-36.9609
PI 329351	Cellulosic	Photoperiod_Sensitive	80.8493	-17.0373	-33.5811
PI 329570	Cellulosic	Photoperiod_Sensitive	80.06	-20.7451	-48.9204
PI 455307	Cellulosic	Photoperiod_Sensitive	79.52	1.50972	17.0657
PI 329517	Cellulosic	Photoperiod_Sensitive	79.26	-19.4559	-48.2531
PI 329286	Cellulosic	Photoperiod_Sensitive	75.0478	-20.4179	-40.9551
PI 329480	Cellulosic	Photoperiod_Sensitive	74.0644	-17.9884	-46.7614
PI 329506	Cellulosic	Photoperiod_Sensitive	67.9652	-17.5873	-41.9821
PI 267573	Cellulosic	Photoperiod_Sensitive	62.0149	-13.0939	-23.0284
PI 563332	Cellulosic	Photoperiod_Sensitive	52.9197	32.2911	126.401
PI 563348	Cellulosic	Photoperiod_Sensitive	51.8506	30.9934	122.405
