# Supplementary material for: Major impacts of widespread structural variation on sorghum
Source: HighWire-hosted journal article supplement (doi:10.1101/gr.278396.123), 2024-02-01
Supplement: Supplemental_Table_S4.xlsx [file Supplemental_Table_S4.xlsx]

## Sheet: Sheet1
Supplemental Table S4 33 representative sweet accessions
AccessionID	Type	Photoperiod Sensitivity	PC1	PC2	PC3
PI 641835	Sweet	Photoperiod_Insensitive	-47.6117	-112.74	16.922
PI 175919	Sweet	Photoperiod_Insensitive	-42.1726	-108.212	20.5407
PI 586541	Sweet	Photoperiod_Insensitive	-46.3519	-107.333	18.2458
PI 641815	Sweet	Photoperiod_Insensitive	-39.3904	-106.936	24.0322
PI 641810	Sweet	Photoperiod_Insensitive	-38.6765	-105.51	23.2042
PI 651495	Sweet	Photoperiod_Insensitive	-44.7714	-100.802	15.3239
PI 641860	Sweet	Photoperiod_Insensitive	-45.637	-99.3626	13.5229
PI 641850	Sweet	Photoperiod_Insensitive	-46.4973	-99.2797	10.6427
PI 641817	Sweet	Photoperiod_Insensitive	-41.7969	-95.3624	13.1435
PI 19770	Sweet	Photoperiod_Insensitive	-39.7374	-93.3961	18.4571
PI 152651	Sweet	Photoperiod_Insensitive	-45.9266	-91.3799	10.436
PI 535795	Sweet	Photoperiod_Insensitive	-44.0051	-91.263	10.6768
PI 535796	Sweet	Photoperiod_Insensitive	-44.2271	-90.6174	9.94437
PI 147224	Sweet	Photoperiod_Insensitive	-49.7382	-88.3547	6.29267
PI 63715	Sweet	Photoperiod_Insensitive	-45.5069	-88.3056	9.94356
PI 566819	Sweet	Photoperiod_Insensitive	-42.2686	-88.124	13.1804
PI 196583	Sweet	Photoperiod_Insensitive	-49.5114	-87.4745	2.45487
PI 535793	Sweet	Photoperiod_Insensitive	-35.2347	-86.656	24.9137
PI 641862	Sweet	Photoperiod_Insensitive	-30.5409	-86.6384	27.1199
PI 586435	Sweet	Photoperiod_Insensitive	-37.5036	-84.7196	13.3478
PI 196586	Sweet	Photoperiod_Insensitive	-47.3444	-79.0808	1.3597
PI 170787	Sweet	Photoperiod_Insensitive	-46.7691	-78.787	2.56788
PI 146890	Sweet	Photoperiod_Insensitive	-45.6387	-76.5996	-0.487113
PI 145619	Sweet	Photoperiod_Insensitive	-48.106	-75.2683	1.1321
PI 641824	Sweet	Photoperiod_Insensitive	-39.3701	-73.6159	12.2839
PI 145626	Sweet	Photoperiod_Insensitive	-47.5581	-73.5036	-1.40908
PI 145632	Sweet	Photoperiod_Insensitive	-45.8476	-73.1741	-1.28375
PI 651491	Sweet	Photoperiod_Insensitive	-39.568	-68.7996	10.106
PI 535783	Sweet	Photoperiod_Insensitive	-27.8511	-68.2603	25.6387
PI 641829	Sweet	Photoperiod_Insensitive	-26.078	-67.6402	22.7824
PI 535785	Sweet	Photoperiod_Insensitive	-39.9158	-67.0027	10.6183
PI 641834	Sweet	Photoperiod_Insensitive	-35.9366	-66.4055	12.4353
PI 302252	Sweet	Photoperiod_Insensitive	-18.7717	-57.6003	23.1349
