# Supplementary material for: Major impacts of widespread structural variation on sorghum
Source: HighWire-hosted journal article supplement (doi:10.1101/gr.278396.123), 2024-02-01
Supplement: Supplemental_Table_S5.xlsx [file Supplemental_Table_S5.xlsx]

## Sheet: Sheet1
Supplemental Table S5 1250 highly differentiated SNPs were adjacent to at least one SV
Chromosome	Position	Left_boundary	Right_boundary	FST	Count of SVs contained
Chromosome 1	3194120	3184120	3204120	0.170402	21
Chromosome 1	6769915	6759915	6779915	0.151953	2
Chromosome 1	9430495	9420495	9440495	0.152131	11
Chromosome 1	10777744	10767744	10787744	0.164681	7
Chromosome 1	10780536	10770536	10790536	0.18317	4
Chromosome 1	10781943	10771943	10791943	0.160048	4
Chromosome 1	10783614	10773614	10793614	0.170054	4
Chromosome 1	10854016	10844016	10864016	0.197953	16
Chromosome 1	11471878	11461878	11481878	0.165675	25
Chromosome 1	12815976	12805976	12825976	0.275086	4
Chromosome 1	15792676	15782676	15802676	0.165548	14
Chromosome 1	15792703	15782703	15802703	0.159703	14
Chromosome 1	15792900	15782900	15802900	0.163168	14
Chromosome 1	15792902	15782902	15802902	0.157913	14
Chromosome 1	16522425	16512425	16532425	0.221394	15
Chromosome 1	17811667	17801667	17821667	0.188135	3
Chromosome 1	19459829	19449829	19469829	0.151222	4
Chromosome 1	21105311	21095311	21115311	0.158	1
Chromosome 1	21286392	21276392	21296392	0.172879	1
Chromosome 1	22472459	22462459	22482459	0.1519	15
Chromosome 1	23126086	23116086	23136086	0.16825	2
Chromosome 1	25302008	25292008	25312008	0.155466	1
Chromosome 1	25934653	25924653	25944653	0.158046	6
Chromosome 1	26113170	26103170	26123170	0.168846	5
Chromosome 1	32717331	32707331	32727331	0.161956	1
Chromosome 1	34480172	34470172	34490172	0.155222	2
Chromosome 1	37067621	37057621	37077621	0.184769	1
Chromosome 1	37069741	37059741	37079741	0.16169	1
Chromosome 1	37070606	37060606	37080606	0.181967	2
Chromosome 1	37070987	37060987	37080987	0.155936	2
Chromosome 2	2494747	2484747	2504747	0.192735	11
Chromosome 2	3862161	3852161	3872161	0.177972	19
Chromosome 2	3862616	3852616	3872616	0.153732	20
Chromosome 2	3874365	3864365	3884365	0.181355	21
Chromosome 2	4089848	4079848	4099848	0.170289	3
Chromosome 2	4092698	4082698	4102698	0.169215	2
Chromosome 2	6593309	6583309	6603309	0.203201	8
Chromosome 2	11087912	11077912	11097912	0.152253	21
Chromosome 2	11088451	11078451	11098451	0.150011	21
Chromosome 2	11088503	11078503	11098503	0.176493	21
Chromosome 2	11106875	11096875	11116875	0.164322	20
Chromosome 2	11504599	11494599	11514599	0.151179	4
Chromosome 2	11512140	11502140	11522140	0.163189	4
Chromosome 2	11561714	11551714	11571714	0.157511	7
Chromosome 2	13574733	13564733	13584733	0.178763	4
Chromosome 2	17813632	17803632	17823632	0.235251	3
Chromosome 2	17815820	17805820	17825820	0.215316	3
Chromosome 2	17816499	17806499	17826499	0.163217	3
Chromosome 2	17817475	17807475	17827475	0.191329	3
Chromosome 2	20123485	20113485	20133485	0.155054	10
Chromosome 2	20244499	20234499	20254499	0.15251	5
Chromosome 2	21731974	21721974	21741974	0.152366	4
Chromosome 2	22129479	22119479	22139479	0.155014	19
Chromosome 2	22131791	22121791	22141791	0.219158	20
Chromosome 2	22132870	22122870	22142870	0.175252	20
Chromosome 2	22133651	22123651	22143651	0.160644	20
Chromosome 2	22134811	22124811	22144811	0.207749	20
Chromosome 2	22182950	22172950	22192950	0.180485	2
Chromosome 2	26685155	26675155	26695155	0.155353	1
Chromosome 2	28199926	28189926	28209926	0.158718	7
Chromosome 2	33058387	33048387	33068387	0.198413	5
Chromosome 2	56072025	56062025	56082025	0.161861	2
Chromosome 2	58634587	58624587	58644587	0.151757	2
Chromosome 2	60510660	60500660	60520660	0.169095	13
Chromosome 2	60510703	60500703	60520703	0.184643	13
Chromosome 2	60513168	60503168	60523168	0.160055	12
Chromosome 2	60518243	60508243	60528243	0.172562	16
Chromosome 2	60522812	60512812	60532812	0.156273	29
Chromosome 2	60531404	60521404	60541404	0.178443	21
Chromosome 2	61409409	61399409	61419409	0.154437	14
Chromosome 2	62321992	62311992	62331992	0.23531	18
Chromosome 2	62321994	62311994	62331994	0.213085	18
Chromosome 2	62322020	62312020	62332020	0.157823	18
Chromosome 2	62322473	62312473	62332473	0.153655	18
Chromosome 2	62322763	62312763	62332763	0.165569	18
Chromosome 2	62322853	62312853	62332853	0.317026	18
Chromosome 2	62828442	62818442	62838442	0.167382	10
Chromosome 2	64678928	64668928	64688928	0.150443	17
Chromosome 2	64679053	64669053	64689053	0.178016	17
Chromosome 2	64679181	64669181	64689181	0.16727	17
Chromosome 2	72507771	72497771	72517771	0.150477	23
Chromosome 3	4185680	4175680	4195680	0.203649	6
Chromosome 3	14246966	14236966	14256966	0.156503	6
Chromosome 3	14248681	14238681	14258681	0.155956	6
Chromosome 3	14248936	14238936	14258936	0.18653	6
Chromosome 3	14249360	14239360	14259360	0.195032	6
Chromosome 3	20984867	20974867	20994867	0.167887	9
Chromosome 3	21053076	21043076	21063076	0.159912	3
Chromosome 3	21123908	21113908	21133908	0.153395	2
Chromosome 3	21166315	21156315	21176315	0.151307	1
Chromosome 3	21217544	21207544	21227544	0.153734	2
Chromosome 3	21218435	21208435	21228435	0.153734	2
Chromosome 3	21239789	21229789	21249789	0.155407	10
Chromosome 3	21242372	21232372	21252372	0.155407	7
Chromosome 3	21242801	21232801	21252801	0.155407	7
Chromosome 3	21243615	21233615	21253615	0.155407	7
Chromosome 3	21247542	21237542	21257542	0.155407	1
Chromosome 3	21248708	21238708	21258708	0.160568	1
Chromosome 3	21286114	21276114	21296114	0.154736	1
Chromosome 3	21287365	21277365	21297365	0.171326	1
Chromosome 3	21314716	21304716	21324716	0.175533	1
Chromosome 3	21342948	21332948	21352948	0.162512	1
Chromosome 3	21349695	21339695	21359695	0.178674	3
Chromosome 3	21355595	21345595	21365595	0.1767	3
Chromosome 3	21356092	21346092	21366092	0.172462	3
Chromosome 3	21358181	21348181	21368181	0.172462	3
Chromosome 3	21364784	21354784	21374784	0.160193	6
Chromosome 3	21370171	21360171	21380171	0.164776	4
Chromosome 3	21375871	21365871	21385871	0.181663	6
Chromosome 3	21385309	21375309	21395309	0.151337	3
Chromosome 3	21393335	21383335	21403335	0.16629	2
Chromosome 3	21408025	21398025	21418025	0.188963	2
Chromosome 3	21426913	21416913	21436913	0.16116	7
Chromosome 3	21426992	21416992	21436992	0.166409	7
Chromosome 3	21427159	21417159	21437159	0.175945	7
Chromosome 3	21428344	21418344	21438344	0.190996	7
Chromosome 3	21428943	21418943	21438943	0.189482	7
Chromosome 3	21432167	21422167	21442167	0.153389	11
Chromosome 3	21432439	21422439	21442439	0.162585	13
Chromosome 3	21437645	21427645	21447645	0.160329	13
Chromosome 3	21439917	21429917	21449917	0.196683	11
Chromosome 3	21440749	21430749	21450749	0.158428	11
Chromosome 3	21441111	21431111	21451111	0.198253	11
Chromosome 3	21543083	21533083	21553083	0.167713	1
Chromosome 3	21545280	21535280	21555280	0.201381	1
Chromosome 3	21545285	21535285	21555285	0.19405	1
Chromosome 3	21546410	21536410	21556410	0.171636	1
Chromosome 3	21551928	21541928	21561928	0.186688	2
Chromosome 3	21580112	21570112	21590112	0.163383	1
Chromosome 3	21583309	21573309	21593309	0.200057	1
Chromosome 3	21585159	21575159	21595159	0.156991	1
Chromosome 3	21598431	21588431	21608431	0.170448	1
Chromosome 3	21650716	21640716	21660716	0.159414	7
Chromosome 3	21656537	21646537	21666537	0.20752	6
Chromosome 3	21658014	21648014	21668014	0.211516	6
Chromosome 3	21658727	21648727	21668727	0.155738	6
Chromosome 3	21664002	21654002	21674002	0.155738	6
Chromosome 3	21666928	21656928	21676928	0.157999	2
Chromosome 3	21675493	21665493	21685493	0.211516	1
Chromosome 3	21675846	21665846	21685846	0.173057	1
Chromosome 3	21675887	21665887	21685887	0.16998	1
Chromosome 3	21676885	21666885	21686885	0.159931	1
Chromosome 3	21678202	21668202	21688202	0.193148	1
Chromosome 3	21679310	21669310	21689310	0.214587	1
Chromosome 3	21679408	21669408	21689408	0.160923	1
Chromosome 3	21680064	21670064	21690064	0.190239	1
Chromosome 3	21680666	21670666	21690666	0.210999	1
Chromosome 3	21680928	21670928	21690928	0.208729	1
Chromosome 3	21681399	21671399	21691399	0.201792	1
Chromosome 3	21684521	21674521	21694521	0.161822	1
Chromosome 3	21686052	21676052	21696052	0.161822	1
Chromosome 3	21689588	21679588	21699588	0.169372	1
Chromosome 3	21691348	21681348	21701348	0.222471	1
Chromosome 3	21693769	21683769	21703769	0.222471	1
Chromosome 3	21695676	21685676	21705676	0.151186	1
Chromosome 3	21698886	21688886	21708886	0.222471	1
Chromosome 3	21699654	21689654	21709654	0.169372	2
Chromosome 3	21701829	21691829	21711829	0.216272	2
Chromosome 3	21709586	21699586	21719586	0.172544	1
Chromosome 3	21710155	21700155	21720155	0.172544	1
Chromosome 3	21715019	21705019	21725019	0.219401	1
Chromosome 3	21811961	21801961	21821961	0.15213	1
Chromosome 3	21813054	21803054	21823054	0.154695	1
Chromosome 3	21814850	21804850	21824850	0.16491	1
Chromosome 3	21815375	21805375	21825375	0.182891	1
Chromosome 3	21817957	21807957	21827957	0.159574	1
Chromosome 3	21828759	21818759	21838759	0.15302	1
Chromosome 3	21834592	21824592	21844592	0.167581	2
Chromosome 3	21837407	21827407	21847407	0.173403	2
Chromosome 3	21838281	21828281	21848281	0.168975	2
Chromosome 3	21839872	21829872	21849872	0.160462	2
Chromosome 3	21840117	21830117	21850117	0.153138	2
Chromosome 3	21846117	21836117	21856117	0.163193	5
Chromosome 3	21846488	21836488	21856488	0.171879	5
Chromosome 3	21847912	21837912	21857912	0.171879	5
Chromosome 3	21849561	21839561	21859561	0.171879	4
Chromosome 3	21854335	21844335	21864335	0.163193	3
Chromosome 3	21856669	21846669	21866669	0.153181	3
Chromosome 3	21857352	21847352	21867352	0.164032	3
Chromosome 3	21861952	21851952	21871952	0.170585	4
Chromosome 3	21862182	21852182	21872182	0.173445	4
Chromosome 3	21863076	21853076	21873076	0.198377	4
Chromosome 3	21894290	21884290	21904290	0.177908	2
Chromosome 3	21896603	21886603	21906603	0.177908	2
Chromosome 3	21897044	21887044	21907044	0.159073	2
Chromosome 3	21904556	21894556	21914556	0.162154	1
Chromosome 3	21904767	21894767	21914767	0.198377	1
Chromosome 3	21906792	21896792	21916792	0.165922	1
Chromosome 3	21910609	21900609	21920609	0.180815	2
Chromosome 3	21917014	21907014	21927014	0.163516	1
Chromosome 3	21917959	21907959	21927959	0.163516	1
Chromosome 3	21924510	21914510	21934510	0.163516	1
Chromosome 3	21926442	21916442	21936442	0.180815	1
Chromosome 3	21949420	21939420	21959420	0.160095	2
Chromosome 3	21960129	21950129	21970129	0.150081	2
Chromosome 3	21962478	21952478	21972478	0.201818	2
Chromosome 3	21962917	21952917	21972917	0.212936	2
Chromosome 3	22008116	21998116	22018116	0.150032	1
Chromosome 3	22008515	21998515	22018515	0.15314	1
Chromosome 3	22010942	22000942	22020942	0.150032	1
Chromosome 3	22011341	22001341	22021341	0.188327	1
Chromosome 3	22011827	22001827	22021827	0.188327	1
Chromosome 3	22013165	22003165	22023165	0.153098	1
Chromosome 3	22048640	22038640	22058640	0.150471	1
Chromosome 3	22049393	22039393	22059393	0.158741	1
Chromosome 3	22049728	22039728	22059728	0.175025	1
Chromosome 3	22102401	22092401	22112401	0.166274	2
Chromosome 3	22108252	22098252	22118252	0.222689	2
Chromosome 3	22170575	22160575	22180575	0.155183	1
Chromosome 3	22174991	22164991	22184991	0.154345	1
Chromosome 3	22182762	22172762	22192762	0.156777	1
Chromosome 3	22197914	22187914	22207914	0.197794	1
Chromosome 3	22200692	22190692	22210692	0.1556	2
Chromosome 3	22201835	22191835	22211835	0.175246	2
Chromosome 3	22214894	22204894	22224894	0.151277	2
Chromosome 3	22215644	22205644	22225644	0.218315	2
Chromosome 3	22215793	22205793	22225793	0.151277	2
Chromosome 3	22249368	22239368	22259368	0.230999	3
Chromosome 3	22252388	22242388	22262388	0.15881	3
Chromosome 3	22252718	22242718	22262718	0.15881	3
Chromosome 3	22253202	22243202	22263202	0.187013	3
Chromosome 3	22254945	22244945	22264945	0.180762	14
Chromosome 3	22257299	22247299	22267299	0.180762	14
Chromosome 3	22260167	22250167	22270167	0.15881	14
Chromosome 3	22264091	22254091	22274091	0.166232	15
Chromosome 3	22265300	22255300	22275300	0.219052	15
Chromosome 3	22270892	22260892	22280892	0.214304	12
Chromosome 3	22271371	22261371	22281371	0.185395	12
Chromosome 3	22322494	22312494	22332494	0.194946	1
Chromosome 3	22325672	22315672	22335672	0.225487	1
Chromosome 3	22346582	22336582	22356582	0.19211	3
Chromosome 3	22346861	22336861	22356861	0.190815	3
Chromosome 3	22347141	22337141	22357141	0.190815	3
Chromosome 3	22348359	22338359	22358359	0.215153	3
Chromosome 3	22348425	22338425	22358425	0.177445	3
Chromosome 3	22348958	22338958	22358958	0.18749	3
Chromosome 3	22349425	22339425	22359425	0.18749	3
Chromosome 3	22349617	22339617	22359617	0.18749	3
Chromosome 3	22350194	22340194	22360194	0.18749	3
Chromosome 3	22351040	22341040	22361040	0.18749	3
Chromosome 3	22358091	22348091	22368091	0.180531	1
Chromosome 3	22405609	22395609	22415609	0.150939	1
Chromosome 3	22408049	22398049	22418049	0.180736	1
Chromosome 3	22446569	22436569	22456569	0.190586	1
Chromosome 3	22452319	22442319	22462319	0.185898	2
Chromosome 3	22520516	22510516	22530516	0.154526	6
Chromosome 3	22522256	22512256	22532256	0.181836	6
Chromosome 3	22524163	22514163	22534163	0.15715	6
Chromosome 3	22532345	22522345	22542345	0.152814	5
Chromosome 3	22605923	22595923	22615923	0.159184	2
Chromosome 3	22608579	22598579	22618579	0.159184	1
Chromosome 3	22609004	22599004	22619004	0.159184	1
Chromosome 3	22685364	22675364	22695364	0.152047	1
Chromosome 3	22838726	22828726	22848726	0.152177	2
Chromosome 3	24731587	24721587	24741587	0.19413	1
Chromosome 3	24731685	24721685	24741685	0.185222	1
Chromosome 3	24732292	24722292	24742292	0.163035	1
Chromosome 3	24741447	24731447	24751447	0.156597	2
Chromosome 3	25217632	25207632	25227632	0.151881	3
Chromosome 3	25253487	25243487	25263487	0.155332	4
Chromosome 3	25267392	25257392	25277392	0.153382	1
Chromosome 3	25269084	25259084	25279084	0.182321	1
Chromosome 3	25282092	25272092	25292092	0.183834	6
Chromosome 3	25288741	25278741	25298741	0.189319	5
Chromosome 3	25289936	25279936	25299936	0.159171	5
Chromosome 3	25318270	25308270	25328270	0.170765	1
Chromosome 3	25338586	25328586	25348586	0.178359	1
Chromosome 3	25338684	25328684	25348684	0.176466	1
Chromosome 3	25338737	25328737	25348737	0.172952	1
Chromosome 3	25339445	25329445	25349445	0.168413	1
Chromosome 3	25343087	25333087	25353087	0.205536	1
Chromosome 3	25352106	25342106	25362106	0.186504	2
Chromosome 3	25370502	25360502	25380502	0.156807	2
Chromosome 3	25383103	25373103	25393103	0.159427	4
Chromosome 3	25400122	25390122	25410122	0.154807	4
Chromosome 3	25401368	25391368	25411368	0.156725	4
Chromosome 3	25408417	25398417	25418417	0.200103	2
Chromosome 3	25410059	25400059	25420059	0.157558	2
Chromosome 3	25410502	25400502	25420502	0.186685	2
Chromosome 3	25410774	25400774	25420774	0.20275	2
Chromosome 3	25411259	25401259	25421259	0.205606	2
Chromosome 3	25411373	25401373	25421373	0.19278	2
Chromosome 3	25411375	25401375	25421375	0.206285	2
Chromosome 3	25411410	25401410	25421410	0.16909	2
Chromosome 3	25412470	25402470	25422470	0.191665	2
Chromosome 3	25415763	25405763	25425763	0.150655	5
Chromosome 3	25585874	25575874	25595874	0.178564	1
Chromosome 3	25796695	25786695	25806695	0.167868	2
Chromosome 3	25798542	25788542	25808542	0.156883	2
Chromosome 3	25886871	25876871	25896871	0.183209	4
Chromosome 3	25907871	25897871	25917871	0.184996	1
Chromosome 3	25910839	25900839	25920839	0.167744	1
Chromosome 3	25950745	25940745	25960745	0.154314	1
Chromosome 3	25996486	25986486	26006486	0.156623	7
Chromosome 3	25998394	25988394	26008394	0.152105	10
Chromosome 3	26003663	25993663	26013663	0.154602	10
Chromosome 3	26064885	26054885	26074885	0.154859	1
Chromosome 3	26119604	26109604	26129604	0.150143	2
Chromosome 3	26132368	26122368	26142368	0.177532	12
Chromosome 3	26376146	26366146	26386146	0.150318	1
Chromosome 3	26383635	26373635	26393635	0.165864	1
Chromosome 3	26399018	26389018	26409018	0.16754	1
Chromosome 3	26405650	26395650	26415650	0.164828	1
Chromosome 3	26733358	26723358	26743358	0.170791	1
Chromosome 3	26735008	26725008	26745008	0.160575	1
Chromosome 3	26955900	26945900	26965900	0.16355	1
Chromosome 3	27287114	27277114	27297114	0.15012	5
Chromosome 3	27781532	27771532	27791532	0.180079	4
Chromosome 3	27786119	27776119	27796119	0.179685	4
Chromosome 3	27830131	27820131	27840131	0.153834	2
Chromosome 3	27898753	27888753	27908753	0.160097	1
Chromosome 3	27907827	27897827	27917827	0.156758	3
Chromosome 3	30090423	30080423	30100423	0.156392	3
Chromosome 3	30093416	30083416	30103416	0.155227	3
Chromosome 3	30095639	30085639	30105639	0.180081	3
Chromosome 3	30096010	30086010	30106010	0.150599	3
Chromosome 3	30158382	30148382	30168382	0.157143	6
Chromosome 3	30159291	30149291	30169291	0.164732	6
Chromosome 3	30159608	30149608	30169608	0.166231	6
Chromosome 3	30167520	30157520	30177520	0.175617	6
Chromosome 3	30171553	30161553	30181553	0.152572	5
Chromosome 3	30183362	30173362	30193362	0.158715	5
Chromosome 3	30261607	30251607	30271607	0.198088	1
Chromosome 3	30261648	30251648	30271648	0.155991	1
Chromosome 3	30798971	30788971	30808971	0.163809	17
Chromosome 3	30888059	30878059	30898059	0.153941	5
Chromosome 3	32292082	32282082	32302082	0.170494	1
Chromosome 3	32952617	32942617	32962617	0.160295	4
Chromosome 3	32963814	32953814	32973814	0.150683	5
Chromosome 3	33024044	33014044	33034044	0.175414	2
Chromosome 3	33354660	33344660	33364660	0.182122	7
Chromosome 3	33354713	33344713	33364713	0.157445	7
Chromosome 3	33359286	33349286	33369286	0.174021	8
Chromosome 3	33364522	33354522	33374522	0.184042	8
Chromosome 3	33364624	33354624	33374624	0.150172	8
Chromosome 3	33364645	33354645	33374645	0.179832	8
Chromosome 3	33370151	33360151	33380151	0.154345	8
Chromosome 3	33370308	33360308	33380308	0.152955	8
Chromosome 3	33461416	33451416	33471416	0.153069	2
Chromosome 3	33481763	33471763	33491763	0.153238	4
Chromosome 3	33496259	33486259	33506259	0.15617	1
Chromosome 3	33528031	33518031	33538031	0.16271	3
Chromosome 3	33705890	33695890	33715890	0.159789	2
Chromosome 3	33812867	33802867	33822867	0.166675	6
Chromosome 3	33814573	33804573	33824573	0.157062	8
Chromosome 3	33815243	33805243	33825243	0.166675	8
Chromosome 3	33857622	33847622	33867622	0.174327	4
Chromosome 3	33888285	33878285	33898285	0.151439	1
Chromosome 3	33905076	33895076	33915076	0.156333	3
Chromosome 3	33906108	33896108	33916108	0.150888	3
Chromosome 3	33915726	33905726	33925726	0.171708	3
Chromosome 3	33918867	33908867	33928867	0.156844	2
Chromosome 3	33922875	33912875	33932875	0.176427	2
Chromosome 3	34017168	34007168	34027168	0.154618	3
Chromosome 3	34019588	34009588	34029588	0.151928	4
Chromosome 3	34024351	34014351	34034351	0.155332	4
Chromosome 3	34028587	34018587	34038587	0.238744	4
Chromosome 3	34057776	34047776	34067776	0.17866	1
Chromosome 3	34075972	34065972	34085972	0.157264	2
Chromosome 3	34090649	34080649	34100649	0.161619	2
Chromosome 3	34091094	34081094	34101094	0.159178	2
Chromosome 3	34102392	34092392	34112392	0.16993	7
Chromosome 3	34140931	34130931	34150931	0.165995	9
Chromosome 3	34144278	34134278	34154278	0.151249	7
Chromosome 3	34171682	34161682	34181682	0.185197	10
Chromosome 3	34173111	34163111	34183111	0.198265	10
Chromosome 3	34173309	34163309	34183309	0.154885	10
Chromosome 3	34174673	34164673	34184673	0.162324	10
Chromosome 3	34178585	34168585	34188585	0.162047	7
Chromosome 3	34179619	34169619	34189619	0.168392	7
Chromosome 3	34213464	34203464	34223464	0.156229	5
Chromosome 3	34216686	34206686	34226686	0.172639	5
Chromosome 3	34216854	34206854	34226854	0.153582	5
Chromosome 3	34218761	34208761	34228761	0.172628	5
Chromosome 3	34219624	34209624	34229624	0.165617	5
Chromosome 3	34238683	34228683	34248683	0.185026	2
Chromosome 3	34243622	34233622	34253622	0.160779	2
Chromosome 3	34265647	34255647	34275647	0.151088	1
Chromosome 3	34307331	34297331	34317331	0.163599	3
Chromosome 3	34312231	34302231	34322231	0.156487	7
Chromosome 3	34320139	34310139	34330139	0.151115	4
Chromosome 3	34335995	34325995	34345995	0.172145	3
Chromosome 3	34338199	34328199	34348199	0.150623	3
Chromosome 3	34347932	34337932	34357932	0.150623	3
Chromosome 3	34348625	34338625	34358625	0.165036	3
Chromosome 3	34355329	34345329	34365329	0.17412	1
Chromosome 3	34365631	34355631	34375631	0.150623	3
Chromosome 3	34373657	34363657	34383657	0.176434	2
Chromosome 3	34376091	34366091	34386091	0.151943	2
Chromosome 3	34401374	34391374	34411374	0.161925	3
Chromosome 3	34403943	34393943	34413943	0.163162	3
Chromosome 3	34405756	34395756	34415756	0.15481	3
Chromosome 3	34417284	34407284	34427284	0.178056	4
Chromosome 3	34425439	34415439	34435439	0.172857	7
Chromosome 3	34442857	34432857	34452857	0.152255	4
Chromosome 3	34453295	34443295	34463295	0.178794	8
Chromosome 3	34520776	34510776	34530776	0.163789	2
Chromosome 3	34543755	34533755	34553755	0.167751	3
Chromosome 3	34544268	34534268	34554268	0.174657	3
Chromosome 3	34546180	34536180	34556180	0.162103	3
Chromosome 3	34553063	34543063	34563063	0.176218	4
Chromosome 3	34570028	34560028	34580028	0.187941	5
Chromosome 3	34612592	34602592	34622592	0.202525	2
Chromosome 3	34612652	34602652	34622652	0.163318	2
Chromosome 3	34612853	34602853	34622853	0.151104	2
Chromosome 3	34613187	34603187	34623187	0.155487	2
Chromosome 3	34613216	34603216	34623216	0.15705	2
Chromosome 3	34617734	34607734	34627734	0.152461	2
Chromosome 3	34631185	34621185	34641185	0.195356	1
Chromosome 3	34719056	34709056	34729056	0.157392	3
Chromosome 3	34719932	34709932	34729932	0.163649	3
Chromosome 3	34731724	34721724	34741724	0.163377	3
Chromosome 3	34739228	34729228	34749228	0.15843	4
Chromosome 3	34777611	34767611	34787611	0.180016	4
Chromosome 3	34789857	34779857	34799857	0.179398	6
Chromosome 3	34790654	34780654	34800654	0.178047	7
Chromosome 3	34796790	34786790	34806790	0.184454	6
Chromosome 3	34796905	34786905	34806905	0.158393	6
Chromosome 3	34797812	34787812	34807812	0.154162	6
Chromosome 3	34797917	34787917	34807917	0.17319	6
Chromosome 3	34801385	34791385	34811385	0.15575	6
Chromosome 3	34803850	34793850	34813850	0.189338	3
Chromosome 3	34835916	34825916	34845916	0.212992	1
Chromosome 3	34843660	34833660	34853660	0.15932	2
Chromosome 3	34846386	34836386	34856386	0.161765	2
Chromosome 3	34850783	34840783	34860783	0.1515	2
Chromosome 3	34854141	34844141	34864141	0.17891	2
Chromosome 3	34857276	34847276	34867276	0.156499	2
Chromosome 3	34864755	34854755	34874755	0.153205	2
Chromosome 3	34868679	34858679	34878679	0.155238	2
Chromosome 3	34869163	34859163	34879163	0.160719	2
Chromosome 3	34871008	34861008	34881008	0.16757	2
Chromosome 3	34872890	34862890	34882890	0.169566	2
Chromosome 3	34874446	34864446	34884446	0.192162	2
Chromosome 3	34878125	34868125	34888125	0.171064	2
Chromosome 3	34883134	34873134	34893134	0.154725	1
Chromosome 3	34884410	34874410	34894410	0.15381	1
Chromosome 3	34913946	34903946	34923946	0.163834	6
Chromosome 3	34915845	34905845	34925845	0.166756	6
Chromosome 3	34916017	34906017	34926017	0.15438	6
Chromosome 3	34916761	34906761	34926761	0.155429	6
Chromosome 3	34917051	34907051	34927051	0.174027	6
Chromosome 3	34917297	34907297	34927297	0.158415	6
Chromosome 3	34920868	34910868	34930868	0.15719	6
Chromosome 3	34921588	34911588	34931588	0.165894	6
Chromosome 3	34922572	34912572	34932572	0.153213	6
Chromosome 3	34923318	34913318	34933318	0.210124	6
Chromosome 3	34931824	34921824	34941824	0.171862	5
Chromosome 3	34952761	34942761	34962761	0.165028	2
Chromosome 3	34956774	34946774	34966774	0.172494	2
Chromosome 3	34956947	34946947	34966947	0.176385	2
Chromosome 3	34979770	34969770	34989770	0.155178	1
Chromosome 3	34980659	34970659	34990659	0.170499	1
Chromosome 3	34981175	34971175	34991175	0.179922	1
Chromosome 3	34981608	34971608	34991608	0.157113	1
Chromosome 3	34981714	34971714	34991714	0.156449	1
Chromosome 3	34984487	34974487	34994487	0.163691	1
Chromosome 3	35599161	35589161	35609161	0.150908	4
Chromosome 3	35600718	35590718	35610718	0.187084	4
Chromosome 3	35600953	35590953	35610953	0.154829	4
Chromosome 3	35602535	35592535	35612535	0.154079	5
Chromosome 3	35602855	35592855	35612855	0.17709	5
Chromosome 3	35603387	35593387	35613387	0.161059	5
Chromosome 3	35603661	35593661	35613661	0.167274	5
Chromosome 3	35604532	35594532	35614532	0.19557	5
Chromosome 3	35605367	35595367	35615367	0.156611	5
Chromosome 3	35606084	35596084	35616084	0.154568	4
Chromosome 3	35617429	35607429	35627429	0.162395	3
Chromosome 3	35619316	35609316	35629316	0.166896	2
Chromosome 3	35626550	35616550	35636550	0.165622	1
Chromosome 3	35702824	35692824	35712824	0.183777	1
Chromosome 3	35707488	35697488	35717488	0.156237	2
Chromosome 3	35708920	35698920	35718920	0.162803	2
Chromosome 3	35726887	35716887	35736887	0.152203	1
Chromosome 3	35733122	35723122	35743122	0.150968	2
Chromosome 3	35734852	35724852	35744852	0.208348	3
Chromosome 3	35739963	35729963	35749963	0.160397	2
Chromosome 3	35763608	35753608	35773608	0.172304	1
Chromosome 3	35765279	35755279	35775279	0.152444	1
Chromosome 3	35876677	35866677	35886677	0.160907	5
Chromosome 3	35877855	35867855	35887855	0.154215	5
Chromosome 3	35906837	35896837	35916837	0.156742	1
Chromosome 3	35964579	35954579	35974579	0.159962	1
Chromosome 3	35966111	35956111	35976111	0.16787	2
Chromosome 3	35968751	35958751	35978751	0.155282	2
Chromosome 3	35970864	35960864	35980864	0.16317	2
Chromosome 3	36055386	36045386	36065386	0.166639	1
Chromosome 3	36101169	36091169	36111169	0.166923	1
Chromosome 3	36101185	36091185	36111185	0.160523	1
Chromosome 3	36103305	36093305	36113305	0.173302	1
Chromosome 3	36103348	36093348	36113348	0.191772	1
Chromosome 3	36104177	36094177	36114177	0.182658	1
Chromosome 3	36105068	36095068	36115068	0.183922	1
Chromosome 3	36150290	36140290	36160290	0.158169	2
Chromosome 3	36161731	36151731	36171731	0.163387	1
Chromosome 3	36162496	36152496	36172496	0.153974	1
Chromosome 3	36163163	36153163	36173163	0.156449	1
Chromosome 3	36163597	36153597	36173597	0.155397	1
Chromosome 3	36167580	36157580	36177580	0.161931	1
Chromosome 3	36196014	36186014	36206014	0.150107	1
Chromosome 3	36619588	36609588	36629588	0.151197	8
Chromosome 3	36620582	36610582	36630582	0.17315	8
Chromosome 3	36632683	36622683	36642683	0.186106	4
Chromosome 3	36632993	36622993	36642993	0.169065	4
Chromosome 3	36634883	36624883	36644883	0.151799	4
Chromosome 3	36686966	36676966	36696966	0.207334	10
Chromosome 3	36691220	36681220	36701220	0.152472	11
Chromosome 3	36691462	36681462	36701462	0.155202	11
Chromosome 3	36692110	36682110	36702110	0.190514	11
Chromosome 3	36692721	36682721	36702721	0.154013	11
Chromosome 3	36745573	36735573	36755573	0.153437	6
Chromosome 3	37409890	37399890	37419890	0.155764	9
Chromosome 3	38618729	38608729	38628729	0.179796	1
Chromosome 3	38618872	38608872	38628872	0.153037	1
Chromosome 3	38618932	38608932	38628932	0.179005	1
Chromosome 3	38619369	38609369	38629369	0.169983	1
Chromosome 3	41775695	41765695	41785695	0.154839	3
Chromosome 3	43529797	43519797	43539797	0.190121	1
Chromosome 3	43529949	43519949	43539949	0.163532	1
Chromosome 3	43539925	43529925	43549925	0.162619	2
Chromosome 3	43679230	43669230	43689230	0.158159	3
Chromosome 3	43680446	43670446	43690446	0.168396	3
Chromosome 3	43955593	43945593	43965593	0.150795	1
Chromosome 3	43956123	43946123	43966123	0.165597	1
Chromosome 3	44004636	43994636	44014636	0.187202	3
Chromosome 3	44006509	43996509	44016509	0.157174	3
Chromosome 3	44015489	44005489	44025489	0.165691	2
Chromosome 3	44042476	44032476	44052476	0.150753	3
Chromosome 3	44090737	44080737	44100737	0.186704	2
Chromosome 3	44215633	44205633	44225633	0.157499	2
Chromosome 3	44226804	44216804	44236804	0.186639	2
Chromosome 3	44231168	44221168	44241168	0.183603	1
Chromosome 3	44360722	44350722	44370722	0.154552	4
Chromosome 3	44363030	44353030	44373030	0.167301	3
Chromosome 3	44363463	44353463	44373463	0.152695	3
Chromosome 3	44363780	44353780	44373780	0.163026	3
Chromosome 3	44386912	44376912	44396912	0.190219	4
Chromosome 3	44428502	44418502	44438502	0.161457	1
Chromosome 3	44490095	44480095	44500095	0.175238	1
Chromosome 3	44531985	44521985	44541985	0.150986	1
Chromosome 3	44532644	44522644	44542644	0.174795	1
Chromosome 3	44532909	44522909	44542909	0.159443	1
Chromosome 3	44533235	44523235	44543235	0.150622	1
Chromosome 3	44538736	44528736	44548736	0.172192	2
Chromosome 3	44541387	44531387	44551387	0.164051	2
Chromosome 3	44618811	44608811	44628811	0.151416	3
Chromosome 3	44726846	44716846	44736846	0.15815	1
Chromosome 3	44781953	44771953	44791953	0.182768	1
Chromosome 3	44792874	44782874	44802874	0.168872	1
Chromosome 3	45133565	45123565	45143565	0.160977	1
Chromosome 3	45198777	45188777	45208777	0.159034	4
Chromosome 3	45253090	45243090	45263090	0.161688	1
Chromosome 3	45674904	45664904	45684904	0.154982	5
Chromosome 3	45679746	45669746	45689746	0.170798	5
Chromosome 3	45681085	45671085	45691085	0.179953	5
Chromosome 3	45681697	45671697	45691697	0.195107	5
Chromosome 3	45708432	45698432	45718432	0.151978	6
Chromosome 3	45763553	45753553	45773553	0.150121	1
Chromosome 3	47069564	47059564	47079564	0.159848	2
Chromosome 3	50077174	50067174	50087174	0.185528	4
Chromosome 3	52062999	52052999	52072999	0.15958	6
Chromosome 3	52068193	52058193	52078193	0.181192	1
Chromosome 3	52556335	52546335	52566335	0.15765	16
Chromosome 3	52557913	52547913	52567913	0.163448	16
Chromosome 3	52559921	52549921	52569921	0.164844	16
Chromosome 3	52562184	52552184	52572184	0.150794	16
Chromosome 3	53745701	53735701	53755701	0.150832	6
Chromosome 3	53745725	53735725	53755725	0.156447	6
Chromosome 3	53746281	53736281	53756281	0.156383	6
Chromosome 3	53746532	53736532	53756532	0.202239	6
Chromosome 3	53746707	53736707	53756707	0.173435	6
Chromosome 3	54149839	54139839	54159839	0.154721	7
Chromosome 3	55984638	55974638	55994638	0.16041	3
Chromosome 3	68990976	68980976	69000976	0.167963	5
Chromosome 3	69264136	69254136	69274136	0.154278	1
Chromosome 4	12442401	12432401	12452401	0.153763	12
Chromosome 4	12508671	12498671	12518671	0.155635	1
Chromosome 4	38440625	38430625	38450625	0.158789	3
Chromosome 4	42314718	42304718	42324718	0.158157	7
Chromosome 4	44071032	44061032	44081032	0.19317	10
Chromosome 4	44095782	44085782	44105782	0.151639	4
Chromosome 4	44514187	44504187	44524187	0.174748	1
Chromosome 4	44518312	44508312	44528312	0.156619	1
Chromosome 4	44948898	44938898	44958898	0.150962	2
Chromosome 4	44955244	44945244	44965244	0.177422	4
Chromosome 4	44957718	44947718	44967718	0.190868	4
Chromosome 4	47411438	47401438	47421438	0.16424	1
Chromosome 4	50375750	50365750	50385750	0.162516	5
Chromosome 4	50375798	50365798	50385798	0.240314	5
Chromosome 4	50375948	50365948	50385948	0.191043	5
Chromosome 4	50376191	50366191	50386191	0.182446	5
Chromosome 4	50376254	50366254	50386254	0.215121	5
Chromosome 4	50377251	50367251	50387251	0.162021	5
Chromosome 4	52460673	52450673	52470673	0.159701	15
Chromosome 4	58474173	58464173	58484173	0.15198	8
Chromosome 4	59975190	59965190	59985190	0.224025	7
Chromosome 4	59976639	59966639	59986639	0.192471	7
Chromosome 4	59978092	59968092	59988092	0.216019	6
Chromosome 4	67180944	67170944	67190944	0.162731	6
Chromosome 4	67188358	67178358	67198358	0.162731	5
Chromosome 5	2803503	2793503	2813503	0.150386	2
Chromosome 5	3666898	3656898	3676898	0.157325	1
Chromosome 5	3799308	3789308	3809308	0.181355	16
Chromosome 5	4957788	4947788	4967788	0.159401	18
Chromosome 5	4973773	4963773	4983773	0.172665	30
Chromosome 5	4984688	4974688	4994688	0.171348	17
Chromosome 5	5115208	5105208	5125208	0.153067	6
Chromosome 5	5445233	5435233	5455233	0.153356	33
Chromosome 5	5475064	5465064	5485064	0.189873	13
Chromosome 5	5494582	5484582	5504582	0.187764	3
Chromosome 5	5494920	5484920	5504920	0.198938	3
Chromosome 5	5499959	5489959	5509959	0.174374	3
Chromosome 5	5500584	5490584	5510584	0.192558	2
Chromosome 5	5500978	5490978	5510978	0.192113	2
Chromosome 5	5501025	5491025	5511025	0.223024	2
Chromosome 5	7457579	7447579	7467579	0.150078	8
Chromosome 5	15889661	15879661	15899661	0.168352	1
Chromosome 5	16237667	16227667	16247667	0.167875	18
Chromosome 5	16239815	16229815	16249815	0.158738	17
Chromosome 5	16240402	16230402	16250402	0.219113	17
Chromosome 5	16241838	16231838	16251838	0.152226	16
Chromosome 5	16248881	16238881	16258881	0.182646	3
Chromosome 5	16249411	16239411	16259411	0.168399	3
Chromosome 5	16259273	16249273	16269273	0.159452	3
Chromosome 5	16426011	16416011	16436011	0.162916	12
Chromosome 5	21527497	21517497	21537497	0.167633	2
Chromosome 5	21528371	21518371	21538371	0.167712	2
Chromosome 5	21529635	21519635	21539635	0.178252	2
Chromosome 5	21531785	21521785	21541785	0.158028	2
Chromosome 5	22885192	22875192	22895192	0.152766	1
Chromosome 5	28384271	28374271	28394271	0.151952	1
Chromosome 5	30733091	30723091	30743091	0.167347	2
Chromosome 5	30825096	30815096	30835096	0.157801	2
Chromosome 5	30825483	30815483	30835483	0.173861	2
Chromosome 5	30825860	30815860	30835860	0.151148	2
Chromosome 5	30831479	30821479	30841479	0.184355	2
Chromosome 5	31444413	31434413	31454413	0.158105	2
Chromosome 5	32304613	32294613	32314613	0.170537	1
Chromosome 5	32408389	32398389	32418389	0.156456	1
Chromosome 5	32425000	32415000	32435000	0.151709	1
Chromosome 5	32484843	32474843	32494843	0.196471	1
Chromosome 5	35243531	35233531	35253531	0.16599	1
Chromosome 5	35244129	35234129	35254129	0.178319	1
Chromosome 5	35248856	35238856	35258856	0.172582	1
Chromosome 5	35252597	35242597	35262597	0.170158	2
Chromosome 5	35252787	35242787	35262787	0.161572	2
Chromosome 5	35254450	35244450	35264450	0.155003	2
Chromosome 5	46244545	46234545	46254545	0.16236	3
Chromosome 5	46640642	46630642	46650642	0.15022	4
Chromosome 5	46721146	46711146	46731146	0.165236	1
Chromosome 5	46773878	46763878	46783878	0.180533	2
Chromosome 5	46911902	46901902	46921902	0.168546	6
Chromosome 5	47101607	47091607	47111607	0.153512	1
Chromosome 5	47130760	47120760	47140760	0.150868	3
Chromosome 5	47161506	47151506	47171506	0.185921	1
Chromosome 5	50497641	50487641	50507641	0.150154	13
Chromosome 5	50705770	50695770	50715770	0.172384	6
Chromosome 5	50716053	50706053	50726053	0.172918	27
Chromosome 5	50843659	50833659	50853659	0.153696	6
Chromosome 5	50849808	50839808	50859808	0.158314	4
Chromosome 5	50851164	50841164	50861164	0.154248	4
Chromosome 5	50851446	50841446	50861446	0.162879	4
Chromosome 5	50853208	50843208	50863208	0.157666	4
Chromosome 5	50854583	50844583	50864583	0.162841	4
Chromosome 5	50855134	50845134	50865134	0.168482	4
Chromosome 5	50855607	50845607	50865607	0.152632	4
Chromosome 5	50857707	50847707	50867707	0.15015	5
Chromosome 5	50868309	50858309	50878309	0.158303	6
Chromosome 5	67480599	67470599	67490599	0.174514	45
Chromosome 5	69826765	69816765	69836765	0.154479	30
Chromosome 5	69827339	69817339	69837339	0.166233	30
Chromosome 5	69854201	69844201	69864201	0.164231	21
Chromosome 5	69857910	69847910	69867910	0.17883	20
Chromosome 5	69858326	69848326	69868326	0.163084	20
Chromosome 5	69858461	69848461	69868461	0.158486	21
Chromosome 5	69861164	69851164	69871164	0.16358	28
Chromosome 5	69913032	69903032	69923032	0.170571	3
Chromosome 6	96251	86251	106251	0.155583	6
Chromosome 6	314357	304357	324357	0.172605	10
Chromosome 6	753309	743309	763309	0.194392	1
Chromosome 6	753349	743349	763349	0.187509	1
Chromosome 6	774278	764278	784278	0.174866	11
Chromosome 6	774778	764778	784778	0.188125	12
Chromosome 6	775612	765612	785612	0.19348	12
Chromosome 6	778259	768259	788259	0.165041	12
Chromosome 6	1083507	1073507	1093507	0.201583	9
Chromosome 6	1720708	1710708	1730708	0.155676	6
Chromosome 6	1764583	1754583	1774583	0.172462	19
Chromosome 6	1765740	1755740	1775740	0.151606	19
Chromosome 6	2588184	2578184	2598184	0.155964	12
Chromosome 6	2590502	2580502	2600502	0.19846	13
Chromosome 6	2592344	2582344	2602344	0.158732	14
Chromosome 6	3704419	3694419	3714419	0.150062	6
Chromosome 6	6146490	6136490	6156490	0.169561	3
Chromosome 6	8096329	8086329	8106329	0.193471	6
Chromosome 6	8291716	8281716	8301716	0.237413	4
Chromosome 6	8461532	8451532	8471532	0.189248	4
Chromosome 6	8630864	8620864	8640864	0.155946	1
Chromosome 6	12377108	12367108	12387108	0.188558	1
Chromosome 6	12426510	12416510	12436510	0.174293	15
Chromosome 6	12429048	12419048	12439048	0.156449	16
Chromosome 6	12429854	12419854	12439854	0.161628	16
Chromosome 6	12432109	12422109	12442109	0.161519	16
Chromosome 6	12432176	12422176	12442176	0.170182	16
Chromosome 6	12440907	12430907	12450907	0.154374	18
Chromosome 6	12441986	12431986	12451986	0.162533	18
Chromosome 6	12442035	12432035	12452035	0.164244	17
Chromosome 6	12553190	12543190	12563190	0.172373	7
Chromosome 6	12659676	12649676	12669676	0.198636	5
Chromosome 6	12663000	12653000	12673000	0.157763	5
Chromosome 6	12663346	12653346	12673346	0.165708	5
Chromosome 6	12664112	12654112	12674112	0.165549	3
Chromosome 6	12859187	12849187	12869187	0.167633	8
Chromosome 6	12930966	12920966	12940966	0.169504	3
Chromosome 6	12939785	12929785	12949785	0.18488	7
Chromosome 6	12940758	12930758	12950758	0.190761	7
Chromosome 6	12946000	12936000	12956000	0.153645	7
Chromosome 6	12950549	12940549	12960549	0.219687	9
Chromosome 6	12977245	12967245	12987245	0.163178	10
Chromosome 6	12978000	12968000	12988000	0.178581	10
Chromosome 6	12978011	12968011	12988011	0.19452	10
Chromosome 6	12978754	12968754	12988754	0.177615	10
Chromosome 6	12978957	12968957	12988957	0.188276	10
Chromosome 6	12986611	12976611	12996611	0.165418	8
Chromosome 6	13200287	13190287	13210287	0.168665	5
Chromosome 6	13200380	13190380	13210380	0.150948	5
Chromosome 6	13358855	13348855	13368855	0.165717	8
Chromosome 6	13434063	13424063	13444063	0.163152	6
Chromosome 6	13435312	13425312	13445312	0.18505	5
Chromosome 6	13437627	13427627	13447627	0.199798	5
Chromosome 6	13437942	13427942	13447942	0.176499	5
Chromosome 6	13439866	13429866	13449866	0.175364	5
Chromosome 6	13440691	13430691	13450691	0.151146	4
Chromosome 6	13441925	13431925	13451925	0.150353	4
Chromosome 6	13442169	13432169	13452169	0.152446	4
Chromosome 6	13442308	13432308	13452308	0.165775	4
Chromosome 6	13451215	13441215	13461215	0.160265	1
Chromosome 6	13557695	13547695	13567695	0.204896	3
Chromosome 6	13572142	13562142	13582142	0.183225	2
Chromosome 6	13573151	13563151	13583151	0.210743	2
Chromosome 6	13574268	13564268	13584268	0.163163	2
Chromosome 6	13574617	13564617	13584617	0.164284	2
Chromosome 6	13575075	13565075	13585075	0.172496	2
Chromosome 6	13635107	13625107	13645107	0.168051	7
Chromosome 6	13635805	13625805	13645805	0.184913	7
Chromosome 6	13639164	13629164	13649164	0.177034	5
Chromosome 6	13785371	13775371	13795371	0.187466	10
Chromosome 6	13786979	13776979	13796979	0.171716	10
Chromosome 6	13787787	13777787	13797787	0.172068	10
Chromosome 6	13846139	13836139	13856139	0.270442	6
Chromosome 6	14592559	14582559	14602559	0.156124	2
Chromosome 6	14740840	14730840	14750840	0.174196	2
Chromosome 6	14748513	14738513	14758513	0.169355	3
Chromosome 6	14785552	14775552	14795552	0.207778	1
Chromosome 6	14788547	14778547	14798547	0.210205	1
Chromosome 6	14789385	14779385	14799385	0.19122	1
Chromosome 6	14789492	14779492	14799492	0.335032	1
Chromosome 6	14790181	14780181	14800181	0.203865	1
Chromosome 6	14866049	14856049	14876049	0.192392	2
Chromosome 6	14866167	14856167	14876167	0.236639	2
Chromosome 6	14866462	14856462	14876462	0.199312	2
Chromosome 6	14866736	14856736	14876736	0.221354	2
Chromosome 6	14866755	14856755	14876755	0.186972	2
Chromosome 6	14866797	14856797	14876797	0.169404	2
Chromosome 6	14867063	14857063	14877063	0.21284	2
Chromosome 6	14867219	14857219	14877219	0.159723	2
Chromosome 6	14867321	14857321	14877321	0.185114	2
Chromosome 6	14867886	14857886	14877886	0.169499	2
Chromosome 6	14867934	14857934	14877934	0.157665	2
Chromosome 6	14868519	14858519	14878519	0.195701	2
Chromosome 6	14869027	14859027	14879027	0.225928	2
Chromosome 6	14870791	14860791	14880791	0.152535	2
Chromosome 6	14871004	14861004	14881004	0.22006	2
Chromosome 6	14872000	14862000	14882000	0.164067	2
Chromosome 6	14872529	14862529	14882529	0.174461	2
Chromosome 6	14872839	14862839	14882839	0.174729	2
Chromosome 6	14873023	14863023	14883023	0.219747	2
Chromosome 6	14873215	14863215	14883215	0.16479	2
Chromosome 6	14873347	14863347	14883347	0.192906	2
Chromosome 6	14873456	14863456	14883456	0.253402	2
Chromosome 6	14873766	14863766	14883766	0.166869	1
Chromosome 6	14873777	14863777	14883777	0.206844	1
Chromosome 6	14873793	14863793	14883793	0.179743	1
Chromosome 6	14874117	14864117	14884117	0.180014	1
Chromosome 6	14874467	14864467	14884467	0.171263	1
Chromosome 6	14874591	14864591	14884591	0.179153	1
Chromosome 6	14874884	14864884	14884884	0.221673	1
Chromosome 6	14875087	14865087	14885087	0.175031	1
Chromosome 6	14875172	14865172	14885172	0.198511	1
Chromosome 6	14875252	14865252	14885252	0.162372	1
Chromosome 6	14875682	14865682	14885682	0.163875	1
Chromosome 6	14900748	14890748	14910748	0.15752	1
Chromosome 6	14940339	14930339	14950339	0.186048	1
Chromosome 6	14940381	14930381	14950381	0.260924	1
Chromosome 6	14940554	14930554	14950554	0.2109	2
Chromosome 6	14940995	14930995	14950995	0.177704	3
Chromosome 6	14941227	14931227	14951227	0.180478	3
Chromosome 6	14941570	14931570	14951570	0.199958	3
Chromosome 6	14941954	14931954	14951954	0.185441	3
Chromosome 6	14943463	14933463	14953463	0.203749	3
Chromosome 6	14943474	14933474	14953474	0.209638	3
Chromosome 6	14944319	14934319	14954319	0.165136	3
Chromosome 6	14945184	14935184	14955184	0.204891	3
Chromosome 6	14945712	14935712	14955712	0.173306	3
Chromosome 6	14946233	14936233	14956233	0.191233	3
Chromosome 6	14946415	14936415	14956415	0.195102	3
Chromosome 6	14946439	14936439	14956439	0.178362	3
Chromosome 6	14946772	14936772	14956772	0.20145	3
Chromosome 6	14952634	14942634	14962634	0.170932	5
Chromosome 6	14957751	14947751	14967751	0.150424	4
Chromosome 6	14959633	14949633	14969633	0.211573	5
Chromosome 6	14960457	14950457	14970457	0.195128	4
Chromosome 6	14972049	14962049	14982049	0.179945	2
Chromosome 6	15000480	14990480	15010480	0.219742	1
Chromosome 6	15000596	14990596	15010596	0.184273	1
Chromosome 6	15001632	14991632	15011632	0.219747	1
Chromosome 6	15001900	14991900	15011900	0.156373	1
Chromosome 6	15002001	14992001	15012001	0.204031	1
Chromosome 6	15002142	14992142	15012142	0.156839	1
Chromosome 6	15002581	14992581	15012581	0.218743	3
Chromosome 6	15002841	14992841	15012841	0.214289	3
Chromosome 6	15141955	15131955	15151955	0.153556	1
Chromosome 6	15145260	15135260	15155260	0.167209	1
Chromosome 6	15177909	15167909	15187909	0.200275	3
Chromosome 6	15178133	15168133	15188133	0.239336	3
Chromosome 6	15638212	15628212	15648212	0.182172	1
Chromosome 6	15713307	15703307	15723307	0.211867	4
Chromosome 6	15714271	15704271	15724271	0.174706	3
Chromosome 6	15715259	15705259	15725259	0.197794	4
Chromosome 6	15716836	15706836	15726836	0.189113	4
Chromosome 6	15720864	15710864	15730864	0.156367	3
Chromosome 6	15720899	15710899	15730899	0.164671	3
Chromosome 6	15725537	15715537	15735537	0.172874	4
Chromosome 6	15725581	15715581	15735581	0.167868	4
Chromosome 6	15726727	15716727	15736727	0.186633	4
Chromosome 6	15726897	15716897	15736897	0.157237	4
Chromosome 6	15726925	15716925	15736925	0.155418	4
Chromosome 6	15727020	15717020	15737020	0.19882	4
Chromosome 6	15729770	15719770	15739770	0.153274	3
Chromosome 6	15730424	15720424	15740424	0.240398	3
Chromosome 6	15733133	15723133	15743133	0.225027	4
Chromosome 6	15733562	15723562	15743562	0.157375	4
Chromosome 6	16018985	16008985	16028985	0.187748	2
Chromosome 6	16617359	16607359	16627359	0.150379	1
Chromosome 6	17685408	17675408	17695408	0.158056	1
Chromosome 6	18177481	18167481	18187481	0.243732	1
Chromosome 6	18179206	18169206	18189206	0.231014	1
Chromosome 6	18179369	18169369	18189369	0.179035	1
Chromosome 6	18179618	18169618	18189618	0.251924	1
Chromosome 6	18180161	18170161	18190161	0.178029	1
Chromosome 6	18180362	18170362	18190362	0.203269	1
Chromosome 6	18180371	18170371	18190371	0.170895	1
Chromosome 6	18182348	18172348	18192348	0.192206	1
Chromosome 6	18185400	18175400	18195400	0.151181	1
Chromosome 6	18187887	18177887	18197887	0.20769	1
Chromosome 6	19048003	19038003	19058003	0.231981	2
Chromosome 6	19048389	19038389	19058389	0.216863	2
Chromosome 6	19048518	19038518	19058518	0.273126	2
Chromosome 6	19051546	19041546	19061546	0.194755	2
Chromosome 6	19301517	19291517	19311517	0.189396	4
Chromosome 6	19926172	19916172	19936172	0.174404	3
Chromosome 6	20072251	20062251	20082251	0.186234	6
Chromosome 6	20072926	20062926	20082926	0.16281	6
Chromosome 6	20101863	20091863	20111863	0.222537	4
Chromosome 6	20167978	20157978	20177978	0.159654	2
Chromosome 6	20169063	20159063	20179063	0.152396	2
Chromosome 6	20169938	20159938	20179938	0.152527	2
Chromosome 6	20227793	20217793	20237793	0.203677	7
Chromosome 6	20230588	20220588	20240588	0.158053	6
Chromosome 6	20232406	20222406	20242406	0.160571	8
Chromosome 6	20232495	20222495	20242495	0.250691	8
Chromosome 6	20232688	20222688	20242688	0.164647	8
Chromosome 6	20234252	20224252	20244252	0.164414	8
Chromosome 6	20234314	20224314	20244314	0.220101	8
Chromosome 6	20240669	20230669	20250669	0.155959	5
Chromosome 6	20244341	20234341	20254341	0.229833	5
Chromosome 6	20245711	20235711	20255711	0.155902	4
Chromosome 6	20247956	20237956	20257956	0.153472	4
Chromosome 6	20291923	20281923	20301923	0.157241	4
Chromosome 6	20292134	20282134	20302134	0.270904	4
Chromosome 6	20294132	20284132	20304132	0.187063	3
Chromosome 6	20406175	20396175	20416175	0.15265	1
Chromosome 6	20591897	20581897	20601897	0.182732	2
Chromosome 6	20625769	20615769	20635769	0.159234	3
Chromosome 6	20689750	20679750	20699750	0.195122	8
Chromosome 6	20784038	20774038	20794038	0.18253	1
Chromosome 6	20842199	20832199	20852199	0.175218	3
Chromosome 6	21011590	21001590	21021590	0.206978	4
Chromosome 6	21012314	21002314	21022314	0.18544	4
Chromosome 6	21025122	21015122	21035122	0.190221	2
Chromosome 6	21178905	21168905	21188905	0.15272	3
Chromosome 6	21189153	21179153	21199153	0.185336	5
Chromosome 6	21210072	21200072	21220072	0.16955	1
Chromosome 6	21212882	21202882	21222882	0.169803	1
Chromosome 6	21213602	21203602	21223602	0.168179	1
Chromosome 6	21213804	21203804	21223804	0.173931	1
Chromosome 6	21213851	21203851	21223851	0.205231	1
Chromosome 6	21214996	21204996	21224996	0.164185	1
Chromosome 6	21215313	21205313	21225313	0.194927	1
Chromosome 6	21218486	21208486	21228486	0.195962	1
Chromosome 6	21219123	21209123	21229123	0.157623	1
Chromosome 6	21223278	21213278	21233278	0.188336	1
Chromosome 6	21251830	21241830	21261830	0.187974	2
Chromosome 6	21256294	21246294	21266294	0.155533	2
Chromosome 6	21258243	21248243	21268243	0.172548	2
Chromosome 6	21258452	21248452	21268452	0.151452	2
Chromosome 6	21357686	21347686	21367686	0.157343	5
Chromosome 6	21364809	21354809	21374809	0.232191	4
Chromosome 6	21365470	21355470	21375470	0.170875	4
Chromosome 6	21402782	21392782	21412782	0.182912	1
Chromosome 6	21407056	21397056	21417056	0.17091	2
Chromosome 6	21407655	21397655	21417655	0.236395	2
Chromosome 6	21407851	21397851	21417851	0.158533	2
Chromosome 6	21430741	21420741	21440741	0.172391	6
Chromosome 6	21437513	21427513	21447513	0.150574	3
Chromosome 6	21441340	21431340	21451340	0.186781	3
Chromosome 6	21445835	21435835	21455835	0.308246	3
Chromosome 6	21446248	21436248	21456248	0.194339	3
Chromosome 6	21446684	21436684	21456684	0.196724	3
Chromosome 6	21446969	21436969	21456969	0.203267	3
Chromosome 6	21447285	21437285	21457285	0.16838	2
Chromosome 6	21455037	21445037	21465037	0.28005	1
Chromosome 6	21469727	21459727	21479727	0.170064	3
Chromosome 6	21471698	21461698	21481698	0.249179	3
Chromosome 6	21471868	21461868	21481868	0.184811	3
Chromosome 6	21494064	21484064	21504064	0.186264	1
Chromosome 6	21496441	21486441	21506441	0.208012	1
Chromosome 6	21498555	21488555	21508555	0.220185	1
Chromosome 6	21508757	21498757	21518757	0.234935	2
Chromosome 6	21587047	21577047	21597047	0.156802	1
Chromosome 6	21701499	21691499	21711499	0.174232	4
Chromosome 6	21727377	21717377	21737377	0.187476	1
Chromosome 6	21744461	21734461	21754461	0.206553	2
Chromosome 6	21749958	21739958	21759958	0.160554	2
Chromosome 6	21795812	21785812	21805812	0.205119	3
Chromosome 6	21803346	21793346	21813346	0.162969	3
Chromosome 6	21804447	21794447	21814447	0.17249	3
Chromosome 6	21816983	21806983	21826983	0.177051	1
Chromosome 6	21824205	21814205	21834205	0.17716	1
Chromosome 6	21824295	21814295	21834295	0.163891	1
Chromosome 6	21824679	21814679	21834679	0.183141	1
Chromosome 6	21851008	21841008	21861008	0.157308	4
Chromosome 6	21852298	21842298	21862298	0.164379	4
Chromosome 6	21852856	21842856	21862856	0.201054	4
Chromosome 6	21853979	21843979	21863979	0.16196	4
Chromosome 6	21854657	21844657	21864657	0.203966	4
Chromosome 6	21903274	21893274	21913274	0.172529	2
Chromosome 6	21908800	21898800	21918800	0.151587	4
Chromosome 6	21908964	21898964	21918964	0.150707	4
Chromosome 6	21913862	21903862	21923862	0.190716	2
Chromosome 6	21974923	21964923	21984923	0.230537	3
Chromosome 6	21975859	21965859	21985859	0.161941	3
Chromosome 6	21978589	21968589	21988589	0.155388	3
Chromosome 6	22007937	21997937	22017937	0.179174	2
Chromosome 6	22038645	22028645	22048645	0.158845	1
Chromosome 6	22055686	22045686	22065686	0.168951	1
Chromosome 6	22340810	22330810	22350810	0.230476	1
Chromosome 6	22357800	22347800	22367800	0.156245	2
Chromosome 6	22358937	22348937	22368937	0.179193	3
Chromosome 6	22359039	22349039	22369039	0.200287	3
Chromosome 6	22359314	22349314	22369314	0.161017	4
Chromosome 6	22380567	22370567	22390567	0.153112	1
Chromosome 6	22383981	22373981	22393981	0.150115	1
Chromosome 6	22384183	22374183	22394183	0.15091	1
Chromosome 6	22384689	22374689	22394689	0.223378	1
Chromosome 6	22508205	22498205	22518205	0.153408	1
Chromosome 6	22511322	22501322	22521322	0.172627	1
Chromosome 6	22851176	22841176	22861176	0.163979	1
Chromosome 6	22920725	22910725	22930725	0.168201	2
Chromosome 6	22980225	22970225	22990225	0.196539	1
Chromosome 6	22984126	22974126	22994126	0.157666	1
Chromosome 6	22987554	22977554	22997554	0.162961	1
Chromosome 6	22989897	22979897	22999897	0.167831	1
Chromosome 6	23026814	23016814	23036814	0.167546	3
Chromosome 6	23027295	23017295	23037295	0.172834	3
Chromosome 6	23028840	23018840	23038840	0.16322	3
Chromosome 6	23172578	23162578	23182578	0.188863	2
Chromosome 6	23180738	23170738	23190738	0.162647	3
Chromosome 6	23412444	23402444	23422444	0.160874	2
Chromosome 6	23420283	23410283	23430283	0.153784	2
Chromosome 6	23424398	23414398	23434398	0.150127	1
Chromosome 6	23615647	23605647	23625647	0.158972	4
Chromosome 6	23748034	23738034	23758034	0.172689	5
Chromosome 6	23917116	23907116	23927116	0.173679	1
Chromosome 6	24415011	24405011	24425011	0.158348	2
Chromosome 6	24438220	24428220	24448220	0.167828	1
Chromosome 6	24483647	24473647	24493647	0.165297	1
Chromosome 6	24486929	24476929	24496929	0.177989	2
Chromosome 6	24660339	24650339	24670339	0.162468	5
Chromosome 6	24666759	24656759	24676759	0.16259	10
Chromosome 6	24683505	24673505	24693505	0.173032	6
Chromosome 6	24859011	24849011	24869011	0.158446	7
Chromosome 6	24997253	24987253	25007253	0.163851	2
Chromosome 6	25285819	25275819	25295819	0.174539	6
Chromosome 6	25289841	25279841	25299841	0.212017	8
Chromosome 6	25299565	25289565	25309565	0.151653	7
Chromosome 6	25301201	25291201	25311201	0.211967	8
Chromosome 6	25301519	25291519	25311519	0.26856	8
Chromosome 6	25301585	25291585	25311585	0.189126	8
Chromosome 6	25458986	25448986	25468986	0.172708	1
Chromosome 6	25480045	25470045	25490045	0.175033	4
Chromosome 6	25512819	25502819	25522819	0.222346	4
Chromosome 6	25602418	25592418	25612418	0.17084	2
Chromosome 6	25602737	25592737	25612737	0.173171	2
Chromosome 6	25921299	25911299	25931299	0.158987	1
Chromosome 6	26570248	26560248	26580248	0.232702	4
Chromosome 6	26852491	26842491	26862491	0.185227	1
Chromosome 6	26860356	26850356	26870356	0.191864	1
Chromosome 6	27836572	27826572	27846572	0.155062	7
Chromosome 6	27837578	27827578	27847578	0.208821	7
Chromosome 6	27838058	27828058	27848058	0.183164	7
Chromosome 6	27838506	27828506	27848506	0.189364	7
Chromosome 6	27839799	27829799	27849799	0.221839	7
Chromosome 6	27848108	27838108	27858108	0.181773	9
Chromosome 6	27851118	27841118	27861118	0.1535	9
Chromosome 6	28555251	28545251	28565251	0.159469	13
Chromosome 6	28559874	28549874	28569874	0.166346	13
Chromosome 6	29657115	29647115	29667115	0.154493	8
Chromosome 6	32391287	32381287	32401287	0.159115	5
Chromosome 6	33102896	33092896	33112896	0.171848	1
Chromosome 6	33108350	33098350	33118350	0.162164	1
Chromosome 6	33515613	33505613	33525613	0.159234	4
Chromosome 6	33516810	33506810	33526810	0.165292	4
Chromosome 6	33704457	33694457	33714457	0.154383	3
Chromosome 6	33704953	33694953	33714953	0.187751	3
Chromosome 6	34428229	34418229	34438229	0.155233	6
Chromosome 6	34530917	34520917	34540917	0.173935	2
Chromosome 6	34535274	34525274	34545274	0.154828	3
Chromosome 6	34545289	34535289	34555289	0.166122	3
Chromosome 6	34756263	34746263	34766263	0.151892	2
Chromosome 6	35014771	35004771	35024771	0.199779	5
Chromosome 6	35017120	35007120	35027120	0.15438	5
Chromosome 6	35120515	35110515	35130515	0.202039	3
Chromosome 6	35227823	35217823	35237823	0.159712	1
Chromosome 6	35232074	35222074	35242074	0.159712	1
Chromosome 6	35292854	35282854	35302854	0.156903	1
Chromosome 6	35298751	35288751	35308751	0.175566	1
Chromosome 6	35437718	35427718	35447718	0.157362	1
Chromosome 6	35466572	35456572	35476572	0.244842	2
Chromosome 6	35467119	35457119	35477119	0.202989	2
Chromosome 6	35468453	35458453	35478453	0.150992	2
Chromosome 6	35468510	35458510	35478510	0.161925	2
Chromosome 6	35469446	35459446	35479446	0.176231	4
Chromosome 6	35479676	35469676	35489676	0.239408	3
Chromosome 6	35481282	35471282	35491282	0.191658	3
Chromosome 6	35481443	35471443	35491443	0.169348	3
Chromosome 6	35485389	35475389	35495389	0.221196	3
Chromosome 6	35496163	35486163	35506163	0.213238	1
Chromosome 6	35497200	35487200	35507200	0.218889	1
Chromosome 6	35500576	35490576	35510576	0.224485	1
Chromosome 6	35650173	35640173	35660173	0.190197	3
Chromosome 6	35708534	35698534	35718534	0.15969	1
Chromosome 6	35708638	35698638	35718638	0.166306	1
Chromosome 6	35708854	35698854	35718854	0.157688	1
Chromosome 6	35710482	35700482	35720482	0.178666	1
Chromosome 6	35716629	35706629	35726629	0.186008	1
Chromosome 6	35720269	35710269	35730269	0.176997	3
Chromosome 6	35751178	35741178	35761178	0.161145	1
Chromosome 6	35968057	35958057	35978057	0.185805	3
Chromosome 6	35968523	35958523	35978523	0.247504	3
Chromosome 6	35969389	35959389	35979389	0.189703	3
Chromosome 6	35970000	35960000	35980000	0.186728	3
Chromosome 6	35970893	35960893	35980893	0.17806	3
Chromosome 6	37256627	37246627	37266627	0.150266	4
Chromosome 6	37472230	37462230	37482230	0.152143	1
Chromosome 6	40621255	40611255	40631255	0.193584	11
Chromosome 6	40621840	40611840	40631840	0.227403	13
Chromosome 6	40626546	40616546	40636546	0.150351	20
Chromosome 6	41270025	41260025	41280025	0.167702	16
Chromosome 6	41270056	41260056	41280056	0.185915	16
Chromosome 6	41270517	41260517	41280517	0.185137	16
Chromosome 6	41270998	41260998	41280998	0.216055	16
Chromosome 6	41271063	41261063	41281063	0.195555	16
Chromosome 6	41271120	41261120	41281120	0.156854	16
Chromosome 6	41271209	41261209	41281209	0.153199	16
Chromosome 6	41271268	41261268	41281268	0.164615	16
Chromosome 6	41271480	41261480	41281480	0.161203	16
Chromosome 6	41271521	41261521	41281521	0.15488	16
Chromosome 6	41271558	41261558	41281558	0.267907	16
Chromosome 6	41271582	41261582	41281582	0.184989	16
Chromosome 6	41271601	41261601	41281601	0.178333	16
Chromosome 6	41271964	41261964	41281964	0.189572	16
Chromosome 6	41272061	41262061	41282061	0.150368	16
Chromosome 6	41272335	41262335	41282335	0.187351	16
Chromosome 6	41273396	41263396	41283396	0.177671	16
Chromosome 6	41274099	41264099	41284099	0.195945	16
Chromosome 6	41274228	41264228	41284228	0.154928	16
Chromosome 6	41274289	41264289	41284289	0.170088	16
Chromosome 6	41274328	41264328	41284328	0.181002	16
Chromosome 6	41274381	41264381	41284381	0.222153	16
Chromosome 6	41287591	41277591	41297591	0.321827	19
Chromosome 6	41287607	41277607	41297607	0.173515	19
Chromosome 6	41287612	41277612	41297612	0.23359	19
Chromosome 6	41287733	41277733	41297733	0.165534	19
Chromosome 6	41287765	41277765	41297765	0.168588	19
Chromosome 6	41287776	41277776	41297776	0.158091	19
Chromosome 6	41287894	41277894	41297894	0.1633	19
Chromosome 6	41287899	41277899	41297899	0.1533	19
Chromosome 6	41287902	41277902	41297902	0.18306	19
Chromosome 6	41287927	41277927	41297927	0.151088	19
Chromosome 6	41287949	41277949	41297949	0.188864	19
Chromosome 6	41288017	41278017	41298017	0.179029	19
Chromosome 6	41288094	41278094	41298094	0.248052	19
Chromosome 6	41288248	41278248	41298248	0.160181	19
Chromosome 6	41288397	41278397	41298397	0.159082	19
Chromosome 6	41288398	41278398	41298398	0.182851	19
Chromosome 6	41288577	41278577	41298577	0.163399	19
Chromosome 6	41288588	41278588	41298588	0.155733	19
Chromosome 6	41288589	41278589	41298589	0.167904	19
Chromosome 6	41294620	41284620	41304620	0.153507	21
Chromosome 6	41294798	41284798	41304798	0.164462	21
Chromosome 6	41295731	41285731	41305731	0.293061	21
Chromosome 6	41299469	41289469	41309469	0.203655	9
Chromosome 6	41299843	41289843	41309843	0.164896	2
Chromosome 6	41345247	41335247	41355247	0.168833	13
Chromosome 6	41345328	41335328	41355328	0.212162	13
Chromosome 6	41345355	41335355	41355355	0.263833	13
Chromosome 6	41345356	41335356	41355356	0.355784	13
Chromosome 6	41345803	41335803	41355803	0.220333	13
Chromosome 6	41345823	41335823	41355823	0.15349	13
Chromosome 6	41345882	41335882	41355882	0.150518	13
Chromosome 6	41345915	41335915	41355915	0.20143	13
Chromosome 6	41345917	41335917	41355917	0.199598	13
Chromosome 6	41346069	41336069	41356069	0.151936	13
Chromosome 6	41346086	41336086	41356086	0.153655	13
Chromosome 6	41346388	41336388	41356388	0.219935	13
Chromosome 6	41346424	41336424	41356424	0.192379	13
Chromosome 6	41346671	41336671	41356671	0.314006	13
Chromosome 6	41346924	41336924	41356924	0.179157	13
Chromosome 6	41347313	41337313	41357313	0.162157	13
Chromosome 6	41347414	41337414	41357414	0.237777	13
Chromosome 6	41347533	41337533	41357533	0.160028	13
Chromosome 6	41347615	41337615	41357615	0.191612	13
Chromosome 6	41348180	41338180	41358180	0.180628	13
Chromosome 6	41348190	41338190	41358190	0.197897	13
Chromosome 6	41348401	41338401	41358401	0.153049	13
Chromosome 6	41348453	41338453	41358453	0.301477	13
Chromosome 6	41348626	41338626	41358626	0.215975	13
Chromosome 6	41348938	41338938	41358938	0.172422	14
Chromosome 6	41348994	41338994	41358994	0.204227	14
Chromosome 6	41349328	41339328	41359328	0.169808	17
Chromosome 6	41349400	41339400	41359400	0.232473	19
Chromosome 6	41349826	41339826	41359826	0.186339	19
Chromosome 6	41350116	41340116	41360116	0.248153	19
Chromosome 6	41350124	41340124	41360124	0.196028	19
Chromosome 6	41350272	41340272	41360272	0.183554	19
Chromosome 6	41350475	41340475	41360475	0.168549	19
Chromosome 6	41350690	41340690	41360690	0.30913	19
Chromosome 6	41351065	41341065	41361065	0.154366	19
Chromosome 6	41351267	41341267	41361267	0.15804	19
Chromosome 6	41351307	41341307	41361307	0.213007	19
Chromosome 6	41351466	41341466	41361466	0.277762	19
Chromosome 6	41351627	41341627	41361627	0.212255	19
Chromosome 6	41351798	41341798	41361798	0.251235	19
Chromosome 6	41351812	41341812	41361812	0.178495	19
Chromosome 6	41353664	41343664	41363664	0.198915	19
Chromosome 6	41353944	41343944	41363944	0.174452	19
Chromosome 6	41354597	41344597	41364597	0.205065	19
Chromosome 6	43480017	43470017	43490017	0.171754	6
Chromosome 6	43481786	43471786	43491786	0.161015	5
Chromosome 6	43482453	43472453	43492453	0.164586	5
Chromosome 6	43494647	43484647	43504647	0.192849	17
Chromosome 6	43497220	43487220	43507220	0.159122	21
Chromosome 6	43944948	43934948	43954948	0.153148	12
Chromosome 6	46814036	46804036	46824036	0.175143	21
Chromosome 6	46814406	46804406	46824406	0.154006	23
Chromosome 6	46937269	46927269	46947269	0.156635	6
Chromosome 6	50626366	50616366	50636366	0.16658	5
Chromosome 6	55231419	55221419	55241419	0.157436	10
Chromosome 6	58126533	58116533	58136533	0.159486	19
Chromosome 6	60236038	60226038	60246038	0.152992	14
Chromosome 7	55589933	55579933	55599933	0.156397	6
Chromosome 8	30068349	30058349	30078349	0.153394	1
Chromosome 8	30294410	30284410	30304410	0.158669	1
Chromosome 8	38508975	38498975	38518975	0.156035	13
Chromosome 8	38512922	38502922	38522922	0.160764	13
Chromosome 8	38514312	38504312	38524312	0.155158	13
Chromosome 8	46225642	46215642	46235642	0.163891	1
Chromosome 8	46689424	46679424	46699424	0.154557	11
Chromosome 8	46756263	46746263	46766263	0.172409	3
Chromosome 8	49474961	49464961	49484961	0.16255	1
Chromosome 8	49874970	49864970	49884970	0.15795	23
Chromosome 8	50076647	50066647	50086647	0.19044	2
Chromosome 8	51139243	51129243	51149243	0.152573	11
Chromosome 8	52909838	52899838	52919838	0.250801	2
Chromosome 8	52909869	52899869	52919869	0.181559	2
Chromosome 8	52910326	52900326	52920326	0.206562	2
Chromosome 8	52910479	52900479	52920479	0.171569	2
Chromosome 8	53258927	53248927	53268927	0.153806	22
Chromosome 8	53271677	53261677	53281677	0.221837	15
Chromosome 8	53594181	53584181	53604181	0.157875	15
Chromosome 8	53595979	53585979	53605979	0.160811	15
Chromosome 8	53600778	53590778	53610778	0.159868	17
Chromosome 8	53927139	53917139	53937139	0.185415	12
Chromosome 8	54083314	54073314	54093314	0.150122	5
Chromosome 8	55331444	55321444	55341444	0.153782	16
Chromosome 8	55357336	55347336	55367336	0.15266	2
Chromosome 8	55768010	55758010	55778010	0.179157	13
Chromosome 8	55768085	55758085	55778085	0.227034	13
Chromosome 8	55768280	55758280	55778280	0.167205	13
Chromosome 8	55772549	55762549	55782549	0.157262	9
Chromosome 8	55772855	55762855	55782855	0.16476	9
Chromosome 8	55772948	55762948	55782948	0.186917	9
Chromosome 8	55773027	55763027	55783027	0.194138	9
Chromosome 8	55773541	55763541	55783541	0.16333	9
Chromosome 8	55776763	55766763	55786763	0.180936	9
Chromosome 8	55777422	55767422	55787422	0.157002	9
Chromosome 8	55778532	55768532	55788532	0.191811	9
Chromosome 8	55780786	55770786	55790786	0.197291	7
Chromosome 8	55780796	55770796	55790796	0.179714	7
Chromosome 8	56228594	56218594	56238594	0.170759	16
Chromosome 8	58692764	58682764	58702764	0.150791	9
Chromosome 8	59017769	59007769	59027769	0.159701	21
Chromosome 8	60215252	60205252	60225252	0.151528	14
Chromosome 9	6547674	6537674	6557674	0.190042	37
Chromosome 9	6548174	6538174	6558174	0.170044	37
Chromosome 9	6548485	6538485	6558485	0.19	37
Chromosome 9	6548782	6538782	6558782	0.165081	39
Chromosome 9	6559453	6549453	6569453	0.151433	37
Chromosome 9	9375887	9365887	9385887	0.158916	3
Chromosome 9	41285490	41275490	41295490	0.187758	4
Chromosome 9	43477095	43467095	43487095	0.168517	8
Chromosome 9	43674858	43664858	43684858	0.153444	3
Chromosome 9	47321729	47311729	47331729	0.177848	13
Chromosome 9	47322012	47312012	47332012	0.194159	13
Chromosome 9	47322511	47312511	47332511	0.180941	11
Chromosome 9	48763702	48753702	48773702	0.204059	1
Chromosome 9	54184970	54174970	54194970	0.184941	14
Chromosome 9	54185622	54175622	54195622	0.212573	14
Chromosome 10	29059214	29049214	29069214	0.201521	1
Chromosome 10	33081069	33071069	33091069	0.158442	5
Chromosome 10	33081294	33071294	33091294	0.176866	5
Chromosome 10	33281114	33271114	33291114	0.151903	1
Chromosome 10	34261456	34251456	34271456	0.156331	3
Chromosome 10	39235974	39225974	39245974	0.159095	3
Chromosome 10	39236667	39226667	39246667	0.179102	3
Chromosome 10	39237628	39227628	39247628	0.158286	3
Chromosome 10	39241753	39231753	39251753	0.150975	2
Chromosome 10	44732101	44722101	44742101	0.17796	31
Chromosome 10	44749580	44739580	44759580	0.156685	9
Chromosome 10	48722431	48712431	48732431	0.182268	1
Chromosome 10	50135058	50125058	50145058	0.178318	10
Chromosome 10	54537810	54527810	54547810	0.180138	9
Chromosome 10	54541509	54531509	54551509	0.263203	9
Chromosome 10	54542325	54532325	54552325	0.247881	9
Chromosome 10	54543764	54533764	54553764	0.204978	9
Chromosome 10	54558596	54548596	54568596	0.158953	7
Chromosome 10	61163062	61153062	61173062	0.184518	19
Chromosome 10	61163147	61153147	61173147	0.170752	19
Chromosome 10	61164494	61154494	61174494	0.162963	19
