# Supplementary material for: Major impacts of widespread structural variation on sorghum
Source: HighWire-hosted journal article supplement (doi:10.1101/gr.278396.123), 2024-02-01
Supplement: Supplemental_Table_S6.xlsx [file Supplemental_Table_S6.xlsx]

## Sheet: Sheet1
Supplemental Table S6 SV frequency difference between representative cellulosic and sweet sorghum lines
Chromosome	Windows	p value	Average SV difference
Chromosome 1	2000000-3000000	2.11733e-07	21.0106
Chromosome 1	3000000-4000000	2.12868e-16	37.9965
Chromosome 1	4000000-5000000	8.59326e-16	41.5603
Chromosome 1	6000000-7000000	1.51698e-08	22.4066
Chromosome 1	7000000-8000000	1.09374e-14	33.6068
Chromosome 1	8000000-9000000	8.771e-16	32.9013
Chromosome 1	10000000-11000000	6.76539e-24	58.7125
Chromosome 1	11000000-12000000	1.76731e-21	49.9443
Chromosome 1	12000000-13000000	9.16425e-16	30.5102
Chromosome 1	13000000-14000000	3.26537e-08	23.9958
Chromosome 1	14000000-15000000	6.86379e-07	20.2403
Chromosome 1	15000000-16000000	0.000419387	22.3439
Chromosome 1	17000000-18000000	3.85105e-13	27.8555
Chromosome 1	18000000-19000000	5.06593e-10	30.4172
Chromosome 1	19000000-20000000	5.90018e-16	28.7992
Chromosome 1	20000000-21000000	8.16046e-20	23.5426
Chromosome 1	21000000-22000000	2.17427e-16	32.172
Chromosome 1	22000000-23000000	2.24869e-18	30.0775
Chromosome 1	26000000-27000000	4.65433e-17	30.9535
Chromosome 1	52000000-53000000	2.02897e-10	27.3094
Chromosome 1	54000000-55000000	2.24646e-15	41.8358
Chromosome 1	55000000-56000000	4.08865e-14	20.6779
Chromosome 1	56000000-57000000	1.13482e-15	39.2798
Chromosome 1	57000000-58000000	4.77435e-21	41.1339
Chromosome 1	58000000-59000000	4.0374e-11	27.3087
Chromosome 1	59000000-60000000	6.66238e-15	44.9077
Chromosome 1	60000000-61000000	7.98336e-16	26.0014
Chromosome 1	67000000-68000000	1.65447e-15	27.4658
Chromosome 1	70000000-71000000	1.61992e-16	22.9549
Chromosome 1	75000000-76000000	1.21776e-16	30.654
Chromosome 1	77000000-78000000	3.07199e-21	38.771
Chromosome 1	78000000-79000000	8.50227e-07	21.1938
Chromosome 2	4000000-5000000	2.41919e-11	36.3023
Chromosome 2	5000000-6000000	1.75475e-11	32.9965
Chromosome 2	6000000-7000000	0.000140249	28.4383
Chromosome 2	7000000-8000000	3.77306e-14	59.9471
Chromosome 2	9000000-10000000	9.70918e-05	26.408
Chromosome 2	10000000-11000000	4.49638e-09	30.5405
Chromosome 2	12000000-13000000	2.61759e-07	25.2382
Chromosome 2	13000000-14000000	1.19554e-14	24.2121
Chromosome 2	16000000-17000000	1.87787e-15	25.3989
Chromosome 2	20000000-21000000	5.45275e-12	23.5603
Chromosome 2	56000000-57000000	2.64951e-09	28.7801
Chromosome 2	58000000-59000000	6.24539e-17	34.9732
Chromosome 2	59000000-60000000	2.64659e-09	28.0543
Chromosome 2	60000000-61000000	2.39865e-10	26.4616
Chromosome 2	71000000-72000000	6.46296e-15	29.3362
Chromosome 2	73000000-74000000	5.02389e-07	24.4736
Chromosome 2	75000000-76000000	4.56959e-10	21.3665
Chromosome 2	76000000-77000000	6.86528e-13	30.5194
Chromosome 2	76742459-77742459	5.65847e-21	21.9746
Chromosome 3	2000000-3000000	1.26382e-13	32.0585
Chromosome 3	4000000-5000000	3.4062e-09	23.864
Chromosome 3	8000000-9000000	0.00374158	20.3221
Chromosome 3	14000000-15000000	4.07489e-14	22.7047
Chromosome 3	16000000-17000000	8.51209e-15	24.7703
Chromosome 3	20000000-21000000	5.23354e-14	21.8168
Chromosome 3	48000000-49000000	1.68203e-17	21.1339
Chromosome 3	49000000-50000000	3.25676e-16	21.3495
Chromosome 3	51000000-52000000	4.11225e-14	30.3805
Chromosome 3	52000000-53000000	3.46529e-19	41.0973
Chromosome 3	54000000-55000000	1.59313e-13	26.9894
Chromosome 3	55000000-56000000	8.60457e-14	29.6794
Chromosome 3	56000000-57000000	4.27837e-10	27.0669
Chromosome 3	57000000-58000000	4.8713e-10	36.6913
Chromosome 3	58000000-59000000	3.74477e-10	28.3023
Chromosome 3	59000000-60000000	2.24587e-13	37.234
Chromosome 3	62000000-63000000	7.74389e-08	22.7294
Chromosome 3	63000000-64000000	2.73931e-15	29.0493
Chromosome 3	65000000-66000000	1.5038e-15	26.0994
Chromosome 3	66000000-67000000	3.01301e-18	30.0698
Chromosome 3	67000000-68000000	9.94937e-17	32.4376
Chromosome 3	68000000-69000000	6.9988e-23	51.871
Chromosome 3	69000000-70000000	9.84833e-18	28.7604
Chromosome 3	70000000-71000000	2.67574e-19	54.6047
Chromosome 3	71000000-72000000	3.13374e-14	36.8534
Chromosome 3	72000000-73000000	1.93947e-17	36.2227
Chromosome 3	73000000-74000000	6.68961e-21	48.1882
Chromosome 4	0-1000000	4.13104e-29	68.2283
Chromosome 4	1000000-2000000	2.00731e-23	47.6032
Chromosome 4	3000000-4000000	6.72324e-22	50.969
Chromosome 4	4000000-5000000	1.59086e-05	22.74
Chromosome 4	5000000-6000000	6.04355e-11	35.4743
Chromosome 4	6000000-7000000	8.67841e-06	22.0965
Chromosome 4	7000000-8000000	1.93797e-09	36.1445
Chromosome 4	8000000-9000000	1.65876e-13	41.6843
Chromosome 4	9000000-10000000	1.21116e-16	41.6737
Chromosome 4	10000000-11000000	6.39083e-23	44.0543
Chromosome 4	11000000-12000000	7.97377e-12	23.8576
Chromosome 4	12000000-13000000	3.09736e-17	33.5356
Chromosome 4	13000000-14000000	2.18572e-05	21.303
Chromosome 4	49000000-50000000	1.12757e-27	26.9105
Chromosome 4	50000000-51000000	2.43623e-09	28.0007
Chromosome 4	51000000-52000000	5.95978e-15	37.5941
Chromosome 4	52000000-53000000	8.50516e-09	30.7068
Chromosome 4	53000000-54000000	0.00402677	20.2946
Chromosome 4	55000000-56000000	1.9259e-05	21.697
Chromosome 4	66000000-67000000	1.0627e-07	22.346
Chromosome 5	3000000-4000000	0.00103691	20.2622
Chromosome 5	5000000-6000000	0.00664054	23.0648
Chromosome 5	6000000-7000000	2.10973e-05	21.506
Chromosome 5	59000000-60000000	7.0494e-09	21.74
Chromosome 5	60000000-61000000	3.60021e-12	26.8428
Chromosome 5	61000000-62000000	2.71435e-10	44.883
Chromosome 5	62000000-63000000	6.53101e-06	25.828
Chromosome 5	65000000-66000000	7.57518e-05	24.117
Chromosome 5	67000000-68000000	1.30532e-09	42.1628
Chromosome 5	68000000-69000000	6.13931e-09	26.3502
Chromosome 5	70000000-71000000	0.00048444	24.988
Chromosome 5	70854669-71854669	1.88311e-07	21.5934
Chromosome 6	0-1000000	4.07314e-17	47.7541
Chromosome 6	1000000-2000000	8.74742e-10	43.1853
Chromosome 6	3000000-4000000	5.08737e-06	24.6927
Chromosome 6	6000000-7000000	1.82166e-14	35.1832
Chromosome 6	32000000-33000000	7.916e-07	23.7407
Chromosome 6	40000000-41000000	1.35738e-06	21.6068
Chromosome 6	41000000-42000000	1.63688e-16	37.9401
Chromosome 6	42000000-43000000	1.42238e-17	43.6575
Chromosome 6	43000000-44000000	5.54423e-13	32.2297
Chromosome 6	45000000-46000000	4.64623e-12	31.3742
Chromosome 6	47000000-48000000	3.6137e-17	51.7984
Chromosome 6	48000000-49000000	3.20651e-06	26.7456
Chromosome 6	54000000-55000000	2.37133e-06	20.7604
Chromosome 6	56000000-57000000	1.37728e-05	20.1649
Chromosome 6	60000000-61000000	2.36474e-05	22.6371
Chromosome 7	1000000-2000000	4.59738e-08	24.0303
Chromosome 7	5000000-6000000	1.05683e-05	26.2128
Chromosome 7	8000000-9000000	2.09788e-08	26.0113
Chromosome 7	9000000-10000000	1.62745e-05	21.5039
Chromosome 7	10000000-11000000	3.65511e-13	22.5743
Chromosome 7	12000000-13000000	6.28131e-07	29.9782
Chromosome 7	13000000-14000000	1.98762e-06	22.4123
Chromosome 7	54000000-55000000	2.23992e-15	35.9732
Chromosome 7	55000000-56000000	3.74396e-18	25.9126
Chromosome 7	56000000-57000000	6.01184e-14	32.9331
Chromosome 7	57000000-58000000	3.07872e-20	45.5941
Chromosome 7	59000000-60000000	3.95809e-19	55.9725
Chromosome 7	60000000-61000000	5.37944e-12	27.5278
Chromosome 7	61000000-62000000	7.57444e-14	43.2967
Chromosome 7	63000000-64000000	1.72539e-15	34.2643
Chromosome 7	64000000-65000000	5.53526e-15	42.8957
Chromosome 8	0-1000000	7.40697e-11	37.4412
Chromosome 8	1000000-2000000	6.24091e-05	32.2417
Chromosome 8	2000000-3000000	1.47376e-12	61.8527
Chromosome 8	3000000-4000000	0.000185147	31.8739
Chromosome 8	4000000-5000000	3.13128e-05	28.2671
Chromosome 8	5000000-6000000	1.51091e-09	39.4877
Chromosome 8	6000000-7000000	3.22719e-24	71.1121
Chromosome 8	7000000-8000000	2.15102e-19	36.4926
Chromosome 8	8000000-9000000	1.40119e-14	24.3157
Chromosome 8	9000000-10000000	5.29841e-19	42.0965
Chromosome 8	10000000-11000000	1.51161e-17	38.124
Chromosome 8	15000000-16000000	6.44909e-15	21.1593
Chromosome 8	44000000-45000000	3.74951e-21	25.0402
Chromosome 8	45000000-46000000	4.58152e-17	25.9774
Chromosome 8	46000000-47000000	1.2103e-15	22.5511
Chromosome 8	47000000-48000000	4.36457e-17	37.4285
Chromosome 8	48000000-49000000	3.95245e-16	24.3453
Chromosome 8	49000000-50000000	1.17998e-24	62.8224
Chromosome 8	50000000-51000000	1.00821e-22	41.9091
Chromosome 8	51000000-52000000	3.97352e-12	30.2643
Chromosome 8	52000000-53000000	7.16399e-12	31.2903
Chromosome 8	53000000-54000000	6.47619e-20	51.0296
Chromosome 8	54000000-55000000	0.00108838	21.2431
Chromosome 8	55000000-56000000	7.8057e-07	23.8492
Chromosome 8	56000000-57000000	0.000399881	28.1734
Chromosome 8	57000000-58000000	0.00172441	22.0486
Chromosome 8	58000000-59000000	8.87223e-09	28.8612
Chromosome 8	60000000-61000000	3.14606e-05	26.4419
Chromosome 8	61686529-62686529	5.2423e-15	34.1966
Chromosome 9	2000000-3000000	6.37127e-12	39.8985
Chromosome 9	4000000-5000000	2.96525e-05	29.8337
Chromosome 9	6000000-7000000	0.000116621	21.5955
Chromosome 9	7000000-8000000	2.77216e-08	24.7907
Chromosome 9	44000000-45000000	9.95928e-09	22.1198
Chromosome 9	45000000-46000000	2.62116e-11	25.7689
Chromosome 9	50000000-51000000	1.72296e-05	21.4066
Chromosome 10	0-1000000	3.87602e-05	28.2319
Chromosome 10	1000000-2000000	0.00581189	21.8006
Chromosome 10	2000000-3000000	1.15952e-10	35.1628
Chromosome 10	3000000-4000000	0.000180626	25.5694
Chromosome 10	4000000-5000000	5.03347e-06	24.0832
Chromosome 10	50000000-51000000	9.10854e-13	32.9577
Chromosome 10	53000000-54000000	8.54485e-06	20.9584
Chromosome 10	55000000-56000000	2.29622e-08	30.6575
Chromosome 10	60000000-61000000	3.00356e-20	44.3735
