# Supplementary material for: Major impacts of widespread structural variation on sorghum
Source: HighWire-hosted journal article supplement (doi:10.1101/gr.278396.123), 2024-02-01
Supplement: Supplemental_Table_S7.xlsx [file Supplemental_Table_S7.xlsx]

## Sheet: Sheet1
Supplemental Table S7 Phenotypes used in analysis
Traits	Description	trait type	Sorghum Type related Traits	photoperiod sensitivity related Traits
2014_ADF	Acid detergent fiber content in 2014	quantitative	Yes	No
2014_Days_to_harvest	Days to harvest in 2014	quantitative	No	Yes
2014_Dry_Weight	Dry weight of biomass in 2014	quantitative	Yes	No
2014_Lignin	Lignin content in 2014	quantitative	Yes	No
2014_NDF	Neutral detergent fiber in 2014	quantitative	Yes	No
2014_NFC	Non-fibrous carbohydrates content in 2014	quantitative	Yes	No
2014_WSC	Water-soluble carbohydrates content in 2014	quantitative	Yes	No
2015_ADF	Acid detergent fiber content in 2015	quantitative	Yes	No
2015_Days_to_harvest	Days to harvest in 2015	quantitative	No	Yes
2015_Dry_Weight	Dry weight of biomass in 2015	quantitative	Yes	No
2015_Lignin	Lignin content in 2015	quantitative	Yes	No
2015_NDF	Neutral detergent fiber in 2015	quantitative	Yes	No
2015_NFC	Non-fibrous carbohydrates content in 2015	quantitative	Yes	No
2015_WSC	Water-soluble carbohydrates content in 2015	quantitative	Yes	No
ADF	Average acid detergent fiber content of 2014 and 2015	quantitative	Yes	No
Anthesis_date	Date of anthesis	quantitative	No	Yes
Brix_maturity	Brix content in maturity stage	quantitative	Yes	No
Brix_milk	Brix content in milk stage	quantitative	Yes	No
Days_to_harvest	Average days to harvest of 2014 and 2015	quantitative	No	Yes
Dry_tons_per_acre	Dry tons per acre	quantitative	Yes	No
Dry_Weight	Dry weight of biomass	quantitative	Yes	No
Lignin	Lingnin content	quantitative	Yes	No
NDF	Average Neutral detergent fiber content of 2014 and 2015	quantitative	Yes	No
NFC	Average non-fibrous carbohydrates content of 2014 and 2015	quantitative	Yes	No
Pericarp_pigmentation	Pericarp pigmentation	binary	No	No
Photoperiod_sensitivity	Photoperiod sensitivity	quantitative	No	Yes
Sorghum_type	Sorghum type: sweet, grain and cellulosic	quantitative	Yes	No
Stalk_height	Stalk height	quantitative	No	Yes
Total_fresh_weight	Total fresh weight	quantitative	Yes	No
WSC	Average water-soluble carbohydrates content of 2014 and 2015	quantitative	Yes	No
