# Supplementary material for: Major impacts of widespread structural variation on sorghum
Source: HighWire-hosted journal article supplement (doi:10.1101/gr.278396.123), 2024-02-01
Supplement: Supplemental_Table_S8.xlsx [file Supplemental_Table_S8.xlsx]

## Sheet: Sheet1
Supplemental Table S8 Summary of insertions in putative transposon hotspots in the five genomes
Rio	Chromosome 1:	None detected
	Chromosome 4:	None detected
RTx430	Chromosome 1:
	BTx623_Chromosome	RTx430_Chromosome	BTx623_Start	BTx623_End	Size	SV Type	RTx430_Start	RTx430_End
	BTx623_Chromosome 1	RTx430_Chromosome 1	68367788	68368773	985	deletion	65846844	65884679
	BTx623_Chromosome 1	RTx430_Chromosome 1	68367788	68368773	37835	insertion	65846844	65884679	# a 985 bp fragment (Chromosome 1: 68367788-68368773) in BTx623 is aligned with a 37.8 kb fragment (Chromosome 1: 65846844-65884679) in RTx430 in whole genome alignment.
	Chromosome 4:	None detected
PI 329545	Chromosome 1:
	BTx623_Chromosome	PI329545_Chromosome	BTx623_Start	BTx623_End	Size	SV Type	PI329545__Start	PI329545__End
	BTx623_Chromosome 1	PI329545_Chromosome 1	68367788	68375845	8057	deletion	83853348	83873124
	BTx623_Chromosome 1	PI329545_Chromosome 1	68367788	68375845	19776	insertion	83853348	83873124	# a 8.1 kb fragment (Chromosome 1: 68367788-68375845) in BTx623 is aligned with a 19.8 kb fragment (Chromosome 1: 83853348-83873124) in PI 329545 in whole genome alignment.
	Chromosome 4:	None detected
PI 337680	Chromosome 1:
	BTx623_Chromosome	PI337680_Chromosome	BTx623_Start	BTx623_End	Size	SV Type	PI337680_Start	PI337680_End
	BTx623_Chromosome 1	PI337680_Chromosome 1	68367788	68375845	8057	deletion	77638445	77658222
	BTx623_Chromosome 1	PI337680_Chromosome 1	68367788	68375845	19777	insertion	77638445	77658222	# a 8.1 kp fragment (Chromosome 1: 68367788-68375845) in BTx623 is aligned with a 19.8 kb fragment (Chromosome 1: 77638445-77658222) in PI 337680 in whole genome alignment.
	Chromosome 4:
	BTx623_Chromosome	PI337680_Chromosome	BTx623_Start	BTx623_End	Size	SV Type	PI337680_Start	PI337680_End
	BTx623_Chromosome 4	PI337680_Chromosome 4	67956204	67956209	8292	insertion	69793534	69801826	# a 5 bp fragment (Chromosome 4: 67956204-67956209) in BTx623 is aligned with a 8.3 kb fragment (Chromosome 4: 69793534-69801826) in PI 337680 in whole genome alignment.
PI 651495	Chromosome 1:
	BTx623_Chromosome	PI651495_Chromosome	BTx623_Start	BTx623_End	Size	SV Type	PI651495_Start	PI651495_End
	BTx623_Chromosome 1	PI651495_Chromosome 1	68365490	68371153	5663	deletion	82215738	82232300
	BTx623_Chromosome 1	PI651495_Chromosome 1	68365490	68371153	16562	insertion	82215738	82232300	# a 5.7 kb fragment (Chromosome 1: 68365490-68371153) in BTx623 is aligned with a 16.6 kb fragment (Chromosome 1: 82215738-82232300) in PI 651495 in whole genome alignment.
	Chromosome 4:	None detected
