# Supplementary material for: Major impacts of widespread structural variation on sorghum
Source: HighWire-hosted journal article supplement (doi:10.1101/gr.278396.123), 2024-02-01
Supplement: Supplemental_Table_S9.xlsx [file Supplemental_Table_S9.xlsx]

## Sheet: Sheet1
Supplemental Table S9 Repeats annotation of the detected insertions in the putative transposon hotspots
RTx430	Chromosome 1 (a 985 bp fragment (Chromosome 1: 68367788-68368773) in BTx623 is aligned with a 37.8 kb fragment (Chromosome 1: 65846844-65884679) in RTx430 in whole genome alignment.)	Repeats Annotation in BTx623
		BTx623_Chromosome	Annotation tool	Method	Start	End	Repeat family	Mached repeat element start	Matched repeat element end
		BTx623_Chromosome 1	RepeatMasker	similarity	68367567	68368047	ID=975245.306996;Name=EnSpm-N1_SB;Target=EnSpm-N1_SB	542	1066
		BTx623_Chromosome 1	RepeatMasker	similarity	68368048	68368258	ID=975245.306997;Name=EnSpm-15_SBi;Target=EnSpm-15_SBi	5045	5262
		Repeats Annotation in RTx430
		RTx430_Chromosome	Annotation tool	Method	Start	End	Repeat family	Mached repeat element start	Matched repeat element end
		RTx430_Chromosome 1	RepeatMasker	similarity	65846623	65846845	ID=1661712.33035;Name=EnSpm-N1_SB;Target=EnSpm-N1_SB	542	763
		RTx430_Chromosome 1	RepeatMasker	similarity	65846826	65846995	ID=1661712.33036;Name=EnSpm-N1_SB;Target=EnSpm-N1_SB	918	1066
		RTx430_Chromosome 1	RepeatMasker	similarity	65846996	65847209	ID=1661712.33037;Name=EnSpm-23_SBi;Target=EnSpm-23_SBi	4293	4510
		RTx430_Chromosome 1	RepeatMasker	similarity	65847198	65847295	ID=1661712.33038;Name=EnSpm-23_SBi;Target=EnSpm-23_SBi	4000	4097
		RTx430_Chromosome 1	RepeatMasker	similarity	65847726	65849420	ID=1661712.33039;Name=Helitron-2_SBi;Target=Helitron-2_SBi	4814	6513
		RTx430_Chromosome 1	RepeatMasker	similarity	65849414	65853775	ID=1661712.33040;Name=Helitron-2_SBi;Target=Helitron-2_SBi	1	4397
		RTx430_Chromosome 1	RepeatMasker	similarity	65855355	65856265	ID=1661712.33041;Name=GYPSOR1_LTR;Target=GYPSOR1_LTR	1	941
		RTx430_Chromosome 1	RepeatMasker	similarity	65856270	65857577	ID=1661712.33042;Name=GYPSOR1_I-int;Target=GYPSOR1_I-int	1	1375
		RTx430_Chromosome 1	RepeatMasker	similarity	65857578	65858754	ID=1661712.33043;Name=Gypsy-123_SBi-LTR;Target=Gypsy-123_SBi-LTR	279	1448
		RTx430_Chromosome 1	RepeatMasker	similarity	65858755	65865247	ID=1661712.33044;Name=GYPSOR1_I-int;Target=GYPSOR1_I-int	1376	8203
		RTx430_Chromosome 1	RepeatMasker	similarity	65865143	65865606	ID=1661712.33045;Name=waba_134O12-1hdnm;Target=waba_134O12-1hdnm	5401	5884
		RTx430_Chromosome 1	RepeatMasker	similarity	65865414	65866481	ID=1661712.33046;Name=GYPSOR1_LTR;Target=GYPSOR1_LTR	252	2390
		RTx430_Chromosome 1	RepeatMasker	similarity	65866482	65867657	ID=1661712.33047;Name=Gypsy-123_SBi-LTR;Target=Gypsy-123_SBi-LTR	279	1448
		RTx430_Chromosome 1	RepeatMasker	similarity	65867658	65867937	ID=1661712.33048;Name=GYPSOR1_LTR;Target=GYPSOR1_LTR	2391	2955
		RTx430_Chromosome 1	RepeatMasker	similarity	65870219	65870320	ID=1661712.15449;Name=Zm_AC148394.3_1L;Target=Zm_AC148394.3_1L	11388	11481
		RTx430_Chromosome 1	RepeatMasker	similarity	65870469	65871222	ID=1661712.15450;Name=LTR-1_SBi;Target=LTR-1_SBi	1	765
		RTx430_Chromosome 1	RepeatMasker	similarity	65872185	65872265	ID=1661712.15451;Name=Gypsy-19_SB-LTR;Target=Gypsy-19_SB-LTR	1040	1122
		RTx430_Chromosome 1	RepeatMasker	similarity	65872232	65874495	ID=1661712.15452;Name=Gypsy-16_SB-LTR;Target=Gypsy-16_SB-LTR	1050	3279
		RTx430_Chromosome 1	RepeatMasker	similarity	65874403	65874495	ID=1661712.15453;Name=gyma_438D03-1;Target=gyma_438D03-1	4136	4211
		RTx430_Chromosome 1	RepeatMasker	similarity	65874496	65881048	ID=1661712.15454;Name=Gypsy-16_SB-I;Target=Gypsy-16_SB-I	1	9526
		RTx430_Chromosome 1	RepeatMasker	similarity	65882011	65882091	ID=1661712.15455;Name=Gypsy-19_SB-LTR;Target=Gypsy-19_SB-LTR	1040	1122
		RTx430_Chromosome 1	RepeatMasker	similarity	65882058	65884339	ID=1661712.15456;Name=Gypsy-16_SB-LTR;Target=Gypsy-16_SB-LTR	1050	4010
PI 329545	Chromosome 1 ( a 8.1 kb fragment (Chromosome 1: 68367788-68375845) in BTx623 is aligned with a 19.8 kb fragment (Chromosome 1: 83853348-83873124) in PI 329545 in whole genome alignment.)	Repeats Annotation in BTx623
		BTx623_Chromosome	Annotation tool	Method	Start	End	Repeat family	Mached repeat element start	Matched repeat element end
		BTx623_Chromosome 1	RepeatMasker	similarity	68367567	68368047	ID=975245.306996;Name=EnSpm-N1_SB;Target=EnSpm-N1_SB	542	1066
		BTx623_Chromosome 1	RepeatMasker	similarity	68368048	68368258	ID=975245.306997;Name=EnSpm-15_SBi;Target=EnSpm-15_SBi	5045	5262
		BTx623_Chromosome 1	RepeatMasker	similarity	68368785	68368928	ID=975245.306998;Name=STOWAWAY12_SB;Target=STOWAWAY12_SB	109	257
		BTx623_Chromosome 1	RepeatMasker	similarity	68368983	68369127	ID=975245.306999;Name=STOWAWAY12B_SB;Target=STOWAWAY12B_SB	94	239
		BTx623_Chromosome 1	RepeatMasker	similarity	68369128	68369219	ID=975245.307000;Name=STOWAWAY12_SB;Target=STOWAWAY12_SB	6	102
		BTx623_Chromosome 1	RepeatMasker	similarity	68370572	68370791	ID=975245.307001;Name=hAT-N13_SBi;Target=hAT-N13_SBi	391	612
		BTx623_Chromosome 1	RepeatMasker	similarity	68371092	68371270	ID=975245.307002;Name=HARB-N8_SBi;Target=HARB-N8_SBi	1	206
		BTx623_Chromosome 1	RepeatMasker	similarity	68374504	68374540	ID=975245.307003;Name=(CAATTCT)n;Target=(CAATTCT)n	1	36
		BTx623_Chromosome 1	RepeatMasker	similarity	68374882	68374982	ID=975245.307004;Name=MuDR-N7_SBi;Target=MuDR-N7_SBi	146	247
		Repeats Annotation in PI 329545
		PI329545_Chromosome	Annotation tool	Method	Start	End	Repeat family	Mached repeat element start	Matched repeat element end
		PI329545_Chromosome 1	RepeatMasker	dispersed_repeat	83853331	83853438	ID=54886;Target=Motif:EnSpm6_SB	10533	10647
		PI329545_Chromosome 1	RepeatMasker	dispersed_repeat	83853439	83853497	ID=54887;Target=Motif:EnSpm-N1_SB	919	1066
		PI329545_Chromosome 1	RepeatMasker	dispersed_repeat	83853512	83853699	ID=54883;Target=Motif:EnSpm-23_SBi	4305	4495
		PI329545_Chromosome 1	RepeatMasker	dispersed_repeat	83853700	83853797	ID=54883;Target=Motif:EnSpm-23_SBi	4002	4099
		PI329545_Chromosome 1	RepeatMasker	dispersed_repeat	83854228	83860698	ID=54888;Target=Motif:Helitron-2_SBi	1	6513
		PI329545_Chromosome 1	RepeatMasker	dispersed_repeat	83865180	83865323	ID=54889;Target=Motif:STOWAWAY12_SB	109	257
		PI329545_Chromosome 1	RepeatMasker	dispersed_repeat	83865329	83865520	ID=54890;Target=Motif:STOWAWAY12B_SB	1	257
		PI329545_Chromosome 1	RepeatMasker	dispersed_repeat	83865521	83865614	ID=54889;Target=Motif:STOWAWAY12_SB	6	104
		PI329545_Chromosome 1	RepeatMasker	dispersed_repeat	83866659	83866841	ID=54891;Target=Motif:hAT-N13_SBi	1	205
		PI329545_Chromosome 1	RepeatMasker	dispersed_repeat	83866961	83867180	ID=54892;Target=Motif:hAT-N13_SBi	391	612
		PI329545_Chromosome 1	RepeatMasker	dispersed_repeat	83867475	83867700	ID=54893;Target=Motif:EnSpm-43_SBi	7475	7700
		PI329545_Chromosome 1	RepeatMasker	dispersed_repeat	83869606	83869955	ID=54894;Target=Motif:CLOUD-1_SB	1	362
		PI329545_Chromosome 1	RepeatMasker	dispersed_repeat	83869807	83870016	ID=54895;Target=Motif:hAT-N14_SBi	322	529
		PI329545_Chromosome 1	RepeatMasker	dispersed_repeat	83869885	83870022	ID=54896;Target=Motif:Gypsy-140_SBi-LTR	152	285
		PI329545_Chromosome 1	RepeatMasker	dispersed_repeat	83870228	83870365	ID=54897;Target=Motif:Gypsy-140_SBi-LTR	152	285
		PI329545_Chromosome 1	RepeatMasker	dispersed_repeat	83870295	83870643	ID=54898;Target=Motif:CLOUD-1_SB	1	362
		PI329545_Chromosome 1	RepeatMasker	dispersed_repeat	83871954	83871990	ID=54899;Target=Motif:(CAATTCT)n	1	36
		PI329545_Chromosome 1	RepeatMasker	dispersed_repeat	83872010	83872232	ID=54900;Target=Motif:Gypsy-62_SB-LTR	571	801
		PI329545_Chromosome 1	RepeatMasker	dispersed_repeat	83872323	83872428	ID=54901;Target=Motif:MuDR-N7_SBi	141	247
		PI329545_Chromosome 1	RepeatMasker	dispersed_repeat	83872834	83872988	ID=54902;Target=Motif:STOWAWAY12_SB	100	257
PI 337680	Chromosome 1 (a 8.1 kp fragment (Chromosome 1: 68367788-68375845) in BTx623 is aligned with a 19.8 kb fragment (Chromosome 1: 77638445-77658222) in PI 337680 in whole genome alignment.)	Repeats Annotation in BTx623
		BTx623_Chromosome	Annotation tool	Method	Start	End	Repeat family	Mached repeat element start	Matched repeat element end
		BTx623_Chromosome 1	RepeatMasker	similarity	68367567	68368047	ID=975245.306996;Name=EnSpm-N1_SB;Target=EnSpm-N1_SB	542	1066
		BTx623_Chromosome 1	RepeatMasker	similarity	68368048	68368258	ID=975245.306997;Name=EnSpm-15_SBi;Target=EnSpm-15_SBi	5045	5262
		BTx623_Chromosome 1	RepeatMasker	similarity	68368785	68368928	ID=975245.306998;Name=STOWAWAY12_SB;Target=STOWAWAY12_SB	109	257
		BTx623_Chromosome 1	RepeatMasker	similarity	68368983	68369127	ID=975245.306999;Name=STOWAWAY12B_SB;Target=STOWAWAY12B_SB	94	239
		BTx623_Chromosome 1	RepeatMasker	similarity	68369128	68369219	ID=975245.307000;Name=STOWAWAY12_SB;Target=STOWAWAY12_SB	6	102
		BTx623_Chromosome 1	RepeatMasker	similarity	68370572	68370791	ID=975245.307001;Name=hAT-N13_SBi;Target=hAT-N13_SBi	391	612
		BTx623_Chromosome 1	RepeatMasker	similarity	68371092	68371270	ID=975245.307002;Name=HARB-N8_SBi;Target=HARB-N8_SBi	1	206
		BTx623_Chromosome 1	RepeatMasker	similarity	68374504	68374540	ID=975245.307003;Name=(CAATTCT)n;Target=(CAATTCT)n	1	36
		BTx623_Chromosome 1	RepeatMasker	similarity	68374882	68374982	ID=975245.307004;Name=MuDR-N7_SBi;Target=MuDR-N7_SBi	146	247
		Repeats Annotation in PI 337680
		PI337680_Chromosome	Annotation tool	Method	Start	End	Repeat family	Mached repeat element start	Matched repeat element end
		PI337680_Chromosome 1	RepeatMasker	dispersed_repeat	77638428	77638535	ID=52875;Target=Motif:EnSpm6_SB	10533	10647
		PI337680_Chromosome 1	RepeatMasker	dispersed_repeat	77638536	77638594	ID=52876;Target=Motif:EnSpm-N1_SB	919	1066
		PI337680_Chromosome 1	RepeatMasker	dispersed_repeat	77638609	77638796	ID=52872;Target=Motif:EnSpm-23_SBi	4305	4495
		PI337680_Chromosome 1	RepeatMasker	dispersed_repeat	77638797	77638894	ID=52872;Target=Motif:EnSpm-23_SBi	4002	4099
		PI337680_Chromosome 1	RepeatMasker	dispersed_repeat	77639325	77645795	ID=52877;Target=Motif:Helitron-2_SBi	1	6513
		PI337680_Chromosome 1	RepeatMasker	dispersed_repeat	77650277	77650420	ID=52878;Target=Motif:STOWAWAY12_SB	109	257
		PI337680_Chromosome 1	RepeatMasker	dispersed_repeat	77650426	77650617	ID=52879;Target=Motif:STOWAWAY12B_SB	1	257
		PI337680_Chromosome 1	RepeatMasker	dispersed_repeat	77650618	77650711	ID=52878;Target=Motif:STOWAWAY12_SB	6	104
		PI337680_Chromosome 1	RepeatMasker	dispersed_repeat	77651756	77651938	ID=52880;Target=Motif:hAT-N13_SBi	1	205
		PI337680_Chromosome 1	RepeatMasker	dispersed_repeat	77652058	77652277	ID=52881;Target=Motif:hAT-N13_SBi	391	612
		PI337680_Chromosome 1	RepeatMasker	dispersed_repeat	77652572	77652797	ID=52882;Target=Motif:EnSpm-43_SBi	7475	7700
		PI337680_Chromosome 1	RepeatMasker	dispersed_repeat	77654704	77655053	ID=52883;Target=Motif:CLOUD-1_SB	1	362
		PI337680_Chromosome 1	RepeatMasker	dispersed_repeat	77654905	77655114	ID=52884;Target=Motif:hAT-N14_SBi	322	529
		PI337680_Chromosome 1	RepeatMasker	dispersed_repeat	77654983	77655120	ID=52885;Target=Motif:Gypsy-140_SBi-LTR	152	285
		PI337680_Chromosome 1	RepeatMasker	dispersed_repeat	77655326	77655463	ID=52886;Target=Motif:Gypsy-140_SBi-LTR	152	285
		PI337680_Chromosome 1	RepeatMasker	dispersed_repeat	77655393	77655741	ID=52887;Target=Motif:CLOUD-1_SB	1	362
		PI337680_Chromosome 1	RepeatMasker	dispersed_repeat	77657052	77657088	ID=52888;Target=Motif:(CAATTCT)n	1	36
		PI337680_Chromosome 1	RepeatMasker	dispersed_repeat	77657108	77657330	ID=52889;Target=Motif:Gypsy-62_SB-LTR	571	801
		PI337680_Chromosome 1	RepeatMasker	dispersed_repeat	77657421	77657526	ID=52890;Target=Motif:MuDR-N7_SBi	141	247
		PI337680_Chromosome 1	RepeatMasker	dispersed_repeat	77657932	77658086	ID=52891;Target=Motif:STOWAWAY12_SB	100	257
	Chromosome 4 (a 5 bp fragment (Chromosome 4: 67956204-67956209) in BTx623 is aligned with a 8.3 kb fragment (Chromosome 4: 69793534-69801826) in PI 337680 in whole genome alignment.)	Repeats Annotation in PI 337680
		PI337680_Chromosome	Annotation tool	Method	Start	End	Repeat family	Mached repeat element start	Matched repeat element end
		PI337680_Chromosome 4	RepeatMasker	dispersed_repeat	69792007	69793534	ID=224069;Target=Motif:Helitron-2_SBi	1	1564
		PI337680_Chromosome 4	RepeatMasker	dispersed_repeat	69793535	69793966	ID=224070;Target=Motif:Gypsy-130_SBi-LTR	1	412
		PI337680_Chromosome 4	RepeatMasker	dispersed_repeat	69794013	69794043	ID=224071;Target=Motif:(CT)n	1	32
		PI337680_Chromosome 4	RepeatMasker	dispersed_repeat	69794223	69796042	ID=224072;Target=Motif:Gypsy-130_SBi-LTR	579	2683
		PI337680_Chromosome 4	RepeatMasker	dispersed_repeat	69796017	69798151	ID=224073;Target=Motif:Gypsy-130_SBi-I	1	1519
		PI337680_Chromosome 4	RepeatMasker	dispersed_repeat	69798139	69798216	ID=224073;Target=Motif:Gypsy-130_SBi-I	1623	1702
		PI337680_Chromosome 4	RepeatMasker	dispersed_repeat	69798218	69799337	ID=224073;Target=Motif:Gypsy-130_SBi-I	1656	2754
		PI337680_Chromosome 4	RepeatMasker	dispersed_repeat	69799320	69799750	ID=224073;Target=Motif:Gypsy-N129_SBi-LTR	1	412
		PI337680_Chromosome 4	RepeatMasker	dispersed_repeat	69799797	69799827	ID=224074;Target=Motif:(CT)n	1	32
		PI337680_Chromosome 4	RepeatMasker	dispersed_repeat	69800007	69801826	ID=224070;Target=Motif:Gypsy-130_SBi-LTR	579	2683
PI 651495	Chromosome 1 (a 5.7 kb fragment (Chromosome 1: 68365490-68371153) in BTx623 is aligned with a 16.6 kb fragment (Chromosome 1: 82215738-82232300) in PI 651495 in whole genome alignment.)	Repeats Annotation in BTx623
		BTx623_Chromosome	Annotation tool	Method	Start	End	Repeat family	Mached repeat element start	Matched repeat element end
		BTx623_Chromosome 1	RepeatMasker	similarity	68366823	68366853	ID=975245.306994;Name=(GAGCCC)n;Target=(GAGCCC)n	1	31
		BTx623_Chromosome 1	RepeatMasker	similarity	68367377	68367571	ID=975245.306995;Name=EnSpm-N1_SB;Target=EnSpm-N1_SB	1	278
		BTx623_Chromosome 1	RepeatMasker	similarity	68367567	68368047	ID=975245.306996;Name=EnSpm-N1_SB;Target=EnSpm-N1_SB	542	1066
		BTx623_Chromosome 1	RepeatMasker	similarity	68368048	68368258	ID=975245.306997;Name=EnSpm-15_SBi;Target=EnSpm-15_SBi	5045	5262
		BTx623_Chromosome 1	RepeatMasker	similarity	68368785	68368928	ID=975245.306998;Name=STOWAWAY12_SB;Target=STOWAWAY12_SB	109	257
		BTx623_Chromosome 1	RepeatMasker	similarity	68368983	68369127	ID=975245.306999;Name=STOWAWAY12B_SB;Target=STOWAWAY12B_SB	94	239
		BTx623_Chromosome 1	RepeatMasker	similarity	68369128	68369219	ID=975245.307000;Name=STOWAWAY12_SB;Target=STOWAWAY12_SB	6	102
		BTx623_Chromosome 1	RepeatMasker	similarity	68370572	68370791	ID=975245.307001;Name=hAT-N13_SBi;Target=hAT-N13_SBi	391	612
		BTx623_Chromosome 1	RepeatMasker	similarity	68371092	68371270	ID=975245.307002;Name=HARB-N8_SBi;Target=HARB-N8_SBi	1	206
		Repeats Annotation in PI 651495
		PI651495_Chromosome	Annotation tool	Method	Start	End	Repeat family	Mached repeat element start	Matched repeat element end
		PI651495_Chromosome 1	RepeatMasker	dispersed_repeat	82215675	82215827	ID=54292;Target="Motif:(TA)n"	1	154
		PI651495_Chromosome 1	RepeatMasker	dispersed_repeat	82217160	82217190	ID=54293;Target="Motif:(GAGCCC)n"	1	31
		PI651495_Chromosome 1	RepeatMasker	dispersed_repeat	82217561	82217713	ID=54294;Target="Motif:EnSpm-23_SBi"	4503	4666
		PI651495_Chromosome 1	RepeatMasker	dispersed_repeat	82217714	82217907	ID=54295;Target="Motif:EnSpm-N1_SB"	1	278
		PI651495_Chromosome 1	RepeatMasker	dispersed_repeat	82217903	82218125	ID=54296;Target="Motif:EnSpm-N1_SB"	542	763
		PI651495_Chromosome 1	RepeatMasker	dispersed_repeat	82218106	82218273	ID=54297;Target="Motif:EnSpm-N1_SB"	918	1066
		PI651495_Chromosome 1	RepeatMasker	dispersed_repeat	82218288	82218475	ID=54294;Target="Motif:EnSpm-23_SBi"	4305	4495
		PI651495_Chromosome 1	RepeatMasker	dispersed_repeat	82218476	82218573	ID=54294;Target="Motif:EnSpm-23_SBi"	4002	4099
		PI651495_Chromosome 1	RepeatMasker	dispersed_repeat	82219018	82225433	ID=54298;Target="Motif:Helitron-2_SBi"	1	6455
		PI651495_Chromosome 1	RepeatMasker	dispersed_repeat	82229916	82230059	ID=54299;Target="Motif:STOWAWAY12_SB"	109	257
		PI651495_Chromosome 1	RepeatMasker	dispersed_repeat	82230065	82230256	ID=54300;Target="Motif:STOWAWAY12B_SB"	1	257
		PI651495_Chromosome 1	RepeatMasker	dispersed_repeat	82230257	82230350	ID=54299;Target="Motif:STOWAWAY12_SB"	6	104
		PI651495_Chromosome 1	RepeatMasker	dispersed_repeat	82231395	82231577	ID=54301;Target="Motif:hAT-N13_SBi"	1	205
		PI651495_Chromosome 1	RepeatMasker	dispersed_repeat	82231697	82231911	ID=54302;Target="Motif:hAT-N13_SBi"	391	612
		PI651495_Chromosome 1	RepeatMasker	dispersed_repeat	82232206	82232431	ID=54303;Target="Motif:EnSpm-43_SBi"	7475	7700
