# Supplementary material for: Major impacts of widespread structural variation on sorghum
Source: HighWire-hosted journal article supplement (doi:10.1101/gr.278396.123), 2024-02-01
Supplement: Supplemental_Table_S10.xlsx [file Supplemental_Table_S10.xlsx]

## Sheet: Sheet1
Supplemental Table S10 Number of significant signals detected in GWAS based on SNP, SV and SNP+SV datasets
Traits	Number of significant SVs detected in SV-based GWAS	Number of significant SNPs detected in SNP-based GWAS	Number of significant variations detected in GWAS based on SNP+SV	Number of significant SVs detected in GWAS based on SNP+SV	Number of significant SNPs detected in GWAS based on SNP+SV	Percentage of detected SVs in GWAS based on SNP+SV were also detected in SV-based GWAS	Percentage of detected SNPs in GWAS based on SNP+SV were also detected in SNP-based GWAS
2014_ADF	3	0	2	2	0	100	NA
2014_Days_to_harvest	18	18	19	2	17	50	100
2014_Dry_Weight	7	1	13	13	0	7.69231	NA
2014_Lignin	4	0	0	0	0	NA	NA
2014_NDF	9	0	4	4	0	25	NA
2014_NFC	9	0	1	1	0	100	NA
2014_WSC	2	0	1	1	0	100	NA
2015_ADF	6	0	0	0	0	NA	NA
2015_Days_to_harvest	17	3	8	6	2	16.6667	100
2015_Dry_Weight	4	0	0	0	0	NA	NA
2015_Lignin	5	0	0	0	0	NA	NA
2015_NDF	7	1	9	9	0	11.1111	NA
2015_NFC	6	0	8	8	0	25	NA
2015_WSC	5	1	11	11	0	18.1818	NA
ADF	6	1	4	4	0	0	NA
Anthesis_date	4	0	0	0	0	NA	NA
Brix_maturity	7	0	1	1	0	0	NA
Brix_milk	0	0	0	0	0	NA	NA
Days_to_harvest	11	8	12	6	6	50	100
Dry_tons_per_acre	7	4	25	21	4	9.52381	100
Dry_Weight	6	1	10	9	1	11.1111	100
Lignin	5	0	0	0	0	NA	NA
NDF	8	1	16	15	1	20	100
NFC	7	2	16	14	2	21.4286	100
Photoperiod_sensitivity	18	2	2	1	1	100	100
Sorghum_type	9	0	1	1	0	0	NA
Stalk_height	6	2	8	6	2	16.6667	100
Total_fresh_weight	7	3	95	90	5	2.22222	60
WSC	9	2	11	9	2	33.3333	100
Total	212	50	277	234	43
NA: not detected
