# Supplementary material for: Major impacts of widespread structural variation on sorghum
Source: HighWire-hosted journal article supplement (doi:10.1101/gr.278396.123), 2024-02-01
Supplement: Supplemental_Table_S11.xlsx [file Supplemental_Table_S11.xlsx]

## Sheet: Sheet1
Supplemental Table S11 GWAS for 23 sorghum type related triats and 6 photoperiod related traits based on SNP, SV and SNP+SV datasets
Traits	Variations	Chromosome	Start Position	END coordinate Chromosome	End Position	Variantion Type	P.value	FDR_Adjusted_P.values	Effect	Detection Database	locusTag	Gene_Start	Gene_Stop	Synonyms	Description
Total_fresh_weight	sv_564_Chr01_681193	Chromosome 1	681193	Chromosome 1	681509	DEL	3.51688e-11	1.08855e-05	2.16889	SNP+SV	Sobic.001G006600	661532	669834	-	probable WRKY transcription factor 35
											Sobic.001G006700	684665	690615	-	inactive poly [ADP-ribose] polymerase RCD1
Total_fresh_weight	sv_593_Chr01_722404	Chromosome 1	722404	Chromosome 1	722455	DEL	3.51688e-11	1.08855e-05	2.16889	SNP+SV	Sobic.001G007200	717984	723547	-	heat stress transcription factor A-1
Total_fresh_weight	sv_594_Chr01_729061	Chromosome 1	729061	Chromosome 1	729116	DEL	3.51688e-11	1.08855e-05	2.16889	SNP+SV	Sobic.001G007200	717984	723547	-	heat stress transcription factor A-1
Total_fresh_weight	sv_655_Chr01_830932	Chromosome 1	830932	Chromosome 1	831421	DEL	3.51688e-11	1.08855e-05	2.16889	SNP+SV	Sobic.001G008900	829021	830644	-	classical arabinogalactan protein 2
Total_fresh_weight	sv_668_Chr01_833296	Chromosome 1	833296	Chromosome 1	833482	DEL	3.51688e-11	1.08855e-05	2.16889	SNP+SV	Sobic.001G008900	829021	830644	-	classical arabinogalactan protein 2
Total_fresh_weight	sv_3016_Chr01_2893299	Chromosome 1	2893299	Chromosome 1	2894746	DEL	3.30894e-09	0.00035063	1.65605	SNP+SV	Sobic.001G038500	2882557	2884958	-	amino acid transporter ANT1
											Sobic.001G038700	2898759	2900504	-	CASP-like protein 4B3
											Sobic.001G038800	2900104	2910005	-	SCAR-like protein 1
2014_Dry_Weight	sv_4504_Chr01_4270912	Chromosome 1	4270912	Chromosome 9|Chromosome 7|Chromosome 4|Chromosome 5	2517557|64778069|57765312|10389015	TRA	1.67519e-09	0.000197531	0.122036	SV	Sobic.001G056700	4275459	4279430	-	light-inducible protein CPRF2
											Sobic.004G227900	57748597	57753429	-	expansin-B16
											Sobic.007G219500	64760094	64761344	-	nuclear transcription factor Y subunit C-6
											Sobic.009G028200	2525898	2531942	-	probable 2-oxoglutarate-dependent dioxygenase At3g111800
2014_WSC	sv_10426_Chr01_10361661	Chromosome 1	10361661	Chromosome 2	63897214	TRA	6.34891e-09	0.00187159	7.97242	SV	Sobic.001G131900	10367083	10371771	-	polygalacturonate 4-alpha-galacturonosyltransferase
2015_NDF	sv_13284_Chr01_12694893	Chromosome 1	12694893	Chromosome 1	12694961	DEL	1.44889e-10	4.27117e-05	3.85694	SV
2015_Lignin	sv_15203_Chr01_14364969	Chromosome 1	14364969	Chromosome 1	14365092	DEL	3.00115e-09	0.000884707	-0.276365	SV
2015_ADF	sv_15220_Chr01_14378881	Chromosome 1	14378881	Chromosome 1	14382524	DEL	3.67175e-09	0.000570242	-1.70481	SV
2014_Lignin	sv_16610_Chr01_15429365	Chromosome 1	15429365	Chromosome 1	15429505	INV	8.37815e-25	4.93958e-19	2.96452	SV
Lignin	sv_16610_Chr01_15429365	Chromosome 1	15429365	Chromosome 1	15429505	INV	7.29669e-08	0.00891268	0.809551	SV
Photoperiod_sensitivity	sv_18820_Chr01_17560174	Chromosome 1	17560174	Chromosome 1	17560374	DEL	4.37615e-16	3.68584e-11	-0.56409	SV	Sobic.001G195500	17557206	17558816	-	cytochrome P450 89A2
											Sobic.001G195550	17562318	17564994	-	protein FAR-RED ELONGATED HYPOCOTYL 3
Dry_tons_per_acre	sv_20561_Chr01_19034654	Chromosome 1	19034654	Chromosome 1	19035542	DEL	4.77676e-09	0.00163796	4.45716	SNP+SV	Sobic.001G207800	19036746	19040290	-	WAT1-related protein At3g02690, chloroplastic
Total_fresh_weight	sv_20561_Chr01_19034654	Chromosome 1	19034654	Chromosome 1	19035542	DEL	1.76729e-09	0.000241221	0.777272	SNP+SV
Total_fresh_weight	sv_20716_Chr01_19153404	Chromosome 1	19153404	Chromosome 1	19153555	DEL	2.06082e-09	0.000241221	4.54376	SNP+SV
Dry_tons_per_acre	sv_21009_Chr01_19419943	Chromosome 1	19419943	Chromosome 1	19420025	DEL	1.42166e-09	0.000759524	5.47242	SNP+SV
Dry_Weight	sv_21009_Chr01_19419943	Chromosome 1	19419943	Chromosome 1	19420025	DEL	6.29744e-09	0.00487132	0.126725	SNP+SV
2015_NDF	snp_1_20022821	Chromosome 1	20022821	Chromosome 1	20022822	SNP	5.70866e-09	0.040793	-9.86962	SNP
2015_WSC	snp_1_20022821	Chromosome 1	20022821	Chromosome 1	20022822	SNP	6.51729e-09	0.0465714	11.4269	SNP
ADF	snp_1_20022821	Chromosome 1	20022821	Chromosome 1	20022822	SNP	4.9363e-09	0.0352739	-6.94062	SNP
NDF	snp_1_20022821	Chromosome 1	20022821	Chromosome 1	20022822	SNP	9.0555e-11	0.00064709	-10.36	SNP
NFC	snp_1_20022821	Chromosome 1	20022821	Chromosome 1	20022822	SNP	3.52345e-10	0.0025178	11.4531	SNP
WSC	snp_1_20022821	Chromosome 1	20022821	Chromosome 1	20022822	SNP	1.12033e-09	0.0080057	11.2163	SNP
2015_ADF	sv_24157_Chr01_23107392	Chromosome 1	23107392	Chromosome 1	23114526	DEL	3.86881e-09	0.000570242	-6.65451	SV
2014_NFC	sv_26313_Chr01_26120101	Chromosome 1	26120101	Chromosome 1	26123308	INV	3.29126e-08	0.00215606	-12.0721	SV
NDF	sv_27906_Chr01_29437459	Chromosome 1	29437459	Chromosome 5	55275949	TRA	6.94536e-08	0.00562024	-7.14018	SV
Brix_maturity	sv_29808_Chr01_37261509	Chromosome 1	37261509	Chromosome 1	37261569	DEL	1.34212e-11	2.63761e-06	1.161	SV
Photoperiod_sensitivity	sv_31470_Chr01_49690109	Chromosome 1	49690109	Chromosome 6	60020885	TRA	1.49287e-08	0.000488979	-0.128058	SV	Sobic.006G266600	60010836	60014819	-	transcription factor SRM1
											Sobic.006G266800	60029522	60030937	-	protein ASPARTIC PROTEASE IN GUARD CELL 2
2015_Days_to_harvest	sv_33002_Chr01_52516060	Chromosome 1	52516060	Chromosome 1	52526322	DEL	4.86595e-15	8.32896e-10	-9.21947	SV
2015_NFC	sv_39813_Chr01_59549616	Chromosome 1	59549616	Chromosome 5	66649284	TRA	8.61538e-09	0.00126986	-9.01676	SV
2015_WSC	sv_39813_Chr01_59549616	Chromosome 1	59549616	Chromosome 5	66649284	TRA	9.03803e-09	0.00133216	-9.26634	SV
Photoperiod_sensitivity	sv_40857_Chr01_60493085	Chromosome 1	60493085	Chromosome 10	49102834	TRA	3.62683e-17	4.27661e-12	-1.03514	SV	Sobic.001G316800	60505053	60512997	-	NAC domain-containing protein 105
Total_fresh_weight	sv_42749_Chr01_61978023	Chromosome 1	61978023	Chromosome 1	61978152	INV	6.65045e-08	0.00675909	0.440235	SV
Total_fresh_weight	sv_42945_Chr01_62132063	Chromosome 1	62132063	Chromosome 9	46326084	TRA	1.36e-09	0.000214697	2.692	SNP+SV	Sobic.001G332900	62138561	62141402	-	putative receptor protein kinase ZmPK1
											Sobic.009G118300	46337787	46343799	-	protein BONZAI 3
2014_Days_to_harvest	sv_46347_Chr01_64872249	Chromosome 1	64872249	Chromosome 4|Chromosome 9	3917398|48963236	TRA	2.26834e-11	1.33736e-06	-7.33796	SV	Sobic.001G358900	64882026	64883966	-	transcription repressor MYB4
Stalk_height	sv_46347_Chr01_64872249	Chromosome 1	64872249	Chromosome 4|Chromosome 9	3917398|48963236	TRA	1.20898e-09	0.000356393	-51.166	SV	Sobic.004G048300	3909550	3911285	-	opioid growth factor receptor
											Sobic.009G134600	48955739	48958993	GID1	gibberellin receptor GID1-like
Photoperiod_sensitivity	sv_46900_Chr01_65403492	Chromosome 1	65403492	Chromosome 1	65407192|65407122	INV|DEL	1.9616e-10	9.63764e-06	0.13681	SV
2014_NDF	sv_48445_Chr01_66911085	Chromosome 1	66911085	Chromosome 1	66911151	DEL	3.32247e-09	0.00642517	10.6665	SNP+SV	Sobic.001G381300	66930715	66931988	-	probable WRKY transcription factor 70
NDF	sv_48445_Chr01_66911085	Chromosome 1	66911085	Chromosome 1	66911151	DEL	5.61502e-10	0.000620492	9.42201	SNP+SV
NFC	sv_48445_Chr01_66911085	Chromosome 1	66911085	Chromosome 1	66911151	DEL	1.44378e-09	0.000819504	-10.503	SNP+SV
2014_NDF	sv_48488_Chr01_66995221	Chromosome 1	66995221	Chromosome 4	54084790	TRA	3.32247e-09	0.00642517	21.333	SNP+SV	Sobic.001G381800	66982308	66986112	-	protein ENHANCED DISEASE RESISTANCE 4
NDF	sv_48488_Chr01_66995221	Chromosome 1	66995221	Chromosome 4	54084790	TRA	5.61502e-10	0.000620492	18.844	SNP+SV	Sobic.001G382400	67013756	67018873	-	receptor-like protein kinase FERONIA
NFC	sv_48488_Chr01_66995221	Chromosome 1	66995221	Chromosome 4	54084790	TRA	1.44378e-09	0.000819504	-21.006	SNP+SV	Sobic.004G188800	54072995	54077390	-	sugar transport protein 5
											Sobic.004G189100	54101320	54103770	-	putative ETHYLENE INSENSITIVE 3-like 4 protein
2014_Dry_Weight	sv_52057_Chr01_70464071	Chromosome 1	70464071	Chromosome 2|Chromosome 3	56922365|71782548	TRA	5.35708e-11	0.000182612	0.193393	SNP+SV	Sobic.001G424500	70465458	70470749	-	probable mannose-1-phosphate guanylyltransferase 1
											Sobic.002G185000	56915523	56916080	-	zinc finger AN1 domain-containing stress-associated protein 17
											Sobic.003G410300	71777501	71782156	-	protein TIFY 9
											Sobic.003G410600	71794614	71798726	-	probable glucuronosyltransferase Os01g0926400
Photoperiod_sensitivity	sv_56244_Chr01_74857077	Chromosome 1	74857077	Chromosome 1	74870270	DEL	2.27984e-11	1.4935e-06	-0.177613	SV	Sobic.001G476500	74879932	74882039	-	transcription factor bHLH96
2014_Dry_Weight	sv_58563_Chr01_77195875	Chromosome 1	77195875	Chromosome 5	1626196	TRA	2.42818e-08	0.00238601	0.0782241	SV	Sobic.005G018050	1605716	1610412	-	zinc finger CCCH domain-containing protein 53
											Sobic.005G018400	1641247	1645146	-	putative disease resistance RPP13-like protein 2
Dry_tons_per_acre	sv_65562_Chr02_2169472	Chromosome 2	2169472	Chromosome 5	61872710	TRA	6.74095e-10	0.000579377	6.70179	SNP+SV
Photoperiod_sensitivity	sv_66597_Chr02_2781881	Chromosome 2	2781881	Chromosome 2	2786425	DEL	3.04309e-18	5.98046e-13	-0.269591	SV	Sobic.002G029900	2765046	2777986	-	myb-like protein L
											Sobic.002G030400	2792830	2795852	-	protein FAR-RED IMPAIRED RESPONSE 1
2015_Days_to_harvest	sv_70761_Chr02_5574315	Chromosome 2	5574315	Chromosome 2	5574605	DEL	3.88774e-13	3.27447e-08	-10.0346	SV
Brix_maturity	sv_77434_Chr02_9797148	Chromosome 2	9797148	Chromosome 5	17087480	TRA	2.62997e-10	3.87644e-05	5.03354	SV	Sobic.002G094600	9808888	9815473	-	probable cellulose synthase A catalytic subunit 6 [UDP-forming]
Days_to_harvest	sv_81534_Chr02_12606511	Chromosome 2	12606511	Chromosome 8	23543423	TRA	9.36065e-09	0.000613205	-11.7833	SV
Dry_tons_per_acre	sv_86119_Chr02_19149333	Chromosome 2	19149333	Chromosome 2	19154863	DEL	2.13479e-09	0.00103209	8.00999	SNP+SV
2014_Dry_Weight	sv_86273_Chr02_19548563	Chromosome 2	19548563	Chromosome 2	19549775	DEL	4.9045e-09	0.00342166	0.161938	SNP+SV	Sobic.002G133400	19518406	19534071	-	serine/threonine-protein kinase CTR1
Dry_tons_per_acre	sv_86273_Chr02_19548563	Chromosome 2	19548563	Chromosome 2	19549775	DEL	3.85794e-10	0.000426324	5.47409	SNP+SV
2014_Days_to_harvest	sv_86538_Chr02_20092673	Chromosome 2	20092673	Chromosome 2	20098003	DEL	7.66665e-16	7.5335e-11	5.313	SV
Dry_tons_per_acre	sv_86538_Chr02_20092673	Chromosome 2	20092673	Chromosome 2	20098003	DEL	2.22342e-11	6.55442e-06	2.51546	SV
Total_fresh_weight	sv_86689_Chr02_20355832	Chromosome 2	20355832	Chromosome 2	20355904	DEL	4.64387e-11	1.08855e-05	3.77634	SNP+SV
Total_fresh_weight	sv_87944_Chr02_23300991	Chromosome 2	23300991	Chromosome 1	48231871	TRA	9.71833e-10	0.000163424	3.07227	SNP+SV
Total_fresh_weight	sv_91391_Chr02_38649162	Chromosome 2	38649162	Chromosome 7	6420937	TRA	4.3232e-09	0.000367491	3.70975	SNP+SV	Sobic.007G061100	6413341	6427344	-	transcription factor TGA6
Sorghum_type	sv_94443_Chr02_50356981	Chromosome 2	50356981	Chromosome 8	59435004	TRA	5.37335e-08	0.00467276	-0.259664	SV	Sobic.008G161000	59435965	59439528	-	serine/threonine-protein kinase HT1-like
Anthesis_data	sv_94557_Chr02_50648242	Chromosome 2	50648242	Chromosome 2	50664159	DEL	5.39044e-08	0.00975595	12.9876	SV
Dry_tons_per_acre	snp_2_52025500	Chromosome 2	52025500	Chromosome 2	52025501	SNP	1.05131e-09	0.00416657	4.51731	SNP	Sobic.002G166500	52009662	52015758	-	probable protein phosphatase 2C 67
											Sobic.002G166600	52017577	52019474	-	cyclin-P3-1
											Sobic.002G166700	52027921	52029876	-	cyclin-P3-1
2014_Dry_Weight	snp_2_52025534	Chromosome 2	52025534	Chromosome 2	52025535	SNP	5.80658e-09	0.021234	0.13174	SNP	Sobic.002G166500	52009662	52015758	-	probable protein phosphatase 2C 67
											Sobic.002G166600	52017577	52019474	-	cyclin-P3-1
											Sobic.002G166700	52027921	52029876	-	cyclin-P3-1
Dry_Weight	snp_2_53199008	Chromosome 2	53199008	Chromosome 2	53199009	SNP	4.21375e-09	0.0301107	0.103146	SNP	Sobic.002G168800	53189952	53202997	-	carotenoid 9,10(9',10')-cleavage dioxygenase
Total_fresh_weight	snp_2_53199008	Chromosome 2	53199008	Chromosome 2	53199009	SNP	3.38669e-10	0.00242007	0.767514	SNP
2015_Days_to_harvest	sv_96022_Chr02_53732530	Chromosome 2	53732530	Chromosome 1	52182098	TRA	4.00785e-20	2.36294e-14	-45.3322	SV
Total_fresh_weight	sv_97720_Chr02_55789925	Chromosome 2	55789925	Chromosome 2	55791223	DUP	3.10561e-09	0.000348161	1.18389	SNP+SV	Sobic.002G177700	55784665	55788899	-	histone acetyltransferase type B catalytic subunit
2014_Dry_Weight	sv_105074_Chr02_60998503	Chromosome 2	60998503	Chromosome 2	60998557	DEL	5.30805e-09	0.00342166	0.158916	SNP+SV	Sobic.002G218100	61013236	61016938	-	thermospermine synthase ACAULIS5
Dry_tons_per_acre	sv_105074_Chr02_60998503	Chromosome 2	60998503	Chromosome 2	60998557	DEL	1.28394e-10	0.000198635	5.5899	SNP+SV	Sobic.002G218200	61015998	61017688	-	serine/threonine-protein kinase HT1
Total_fresh_weight	sv_106977_Chr02_62489628	Chromosome 2	62489628	Chromosome 2	62490319	DEL	4.3232e-09	0.000367491	1.85487	SNP+SV	Sobic.002G233800	62486832	62489116	-	homeobox-leucine zipper protein HOX4
											Sobic.002G234200	62507590	62513205	-	peroxidase 17
Total_fresh_weight	sv_106978_Chr02_62491211	Chromosome 2	62491211	Chromosome 2	62491886	DEL	4.3232e-09	0.000367491	1.85487	SNP+SV	Sobic.002G233800	62486832	62489116	-	homeobox-leucine zipper protein HOX4
											Sobic.002G234200	62507590	62513205	-	peroxidase 17
Total_fresh_weight	sv_106982_Chr02_62493354	Chromosome 2	62493354	Chromosome 2	62493743	DEL	4.3232e-09	0.000367491	1.85487	SNP+SV	Sobic.002G233800	62486832	62489116	-	homeobox-leucine zipper protein HOX4
											Sobic.002G234200	62507590	62513205	-	peroxidase 17
2015_ADF	sv_116478_Chr02_69674191	Chromosome 2	69674191	Chromosome 2	69682143	INV	3.35308e-10	0.00019769	15.7191	SV	Sobic.002G326900	69678532	69681631	-	AUGMIN subunit 1
2014_Days_to_harvest	sv_117162_Chr02_70097406	Chromosome 2	70097406	Chromosome 2	70097464	DEL	2.51407e-08	0.000926401	-4.52579	SV	Sobic.002G332400	70107597	70110326	-	pentatricopeptide repeat-containing protein At3g46870
Lignin	sv_117992_Chr02_70672585	Chromosome 2	70672585	Chromosome 2	70672644	DEL	4.8259e-13	2.84525e-07	0.294556	SV
Total_fresh_weight	sv_120226_Chr02_72768079	Chromosome 2	72768079	Chromosome 1	71628720	TRA	2.06082e-09	0.000241221	4.54376	SNP+SV	Sobic.002G367900	72761165	72763439	-	aspartyl protease family protein 2
											Sobic.001G438100	71631156	71634003	-	3-ketoacyl-CoA synthase 1
Photoperiod_sensitivity	sv_124155_Chr02_75778453	Chromosome 2	75778453	Chromosome 2	75780403	DEL	1.26763e-09	4.98246e-05	-0.115408	SV	Sobic.002G409000	75773614	75775575	-	GDSL esterase/lipase At2g23540
Lignin	sv_128923_Chr03_1918671	Chromosome 3	1918671	Chromosome 7	61640410	TRA	4.96796e-09	0.000976334	-0.474463	SV	Sobic.007G183200	61641934	61646818	-	transcription factor bHLH14
Dry_tons_per_acre	sv_128977_Chr03_1941778	Chromosome 3	1941778	Chromosome 3	1942880	DEL	4.06848e-08	0.00399782	-2.75859	SV	Sobic.003G022600	1935757	1938722	-	cationic amino acid transporter 5
											Sobic.003G022700	1958561	1961449	-	gibberellin 2-beta-dioxygenase 1
Total_fresh_weight	sv_129411_Chr03_2183905	Chromosome 3	2183905	Chromosome 9	49503602	TRA	2.06082e-09	0.000241221	4.54376	SNP+SV	Sobic.003G026000	2201553	2202447	-	proline-rich receptor-like protein kinase PERK9
											Sobic.009G138000	49498788	49503540	-	putative disease resistance protein RGA3
2014_Dry_Weight	sv_129788_Chr03_2488923	Chromosome 3	2488923	Chromosome 9	343770|343766	TRA	2.43258e-09	0.00268814	0.24353	SNP+SV
Stalk_height	sv_130671_Chr03_3084734	Chromosome 3	3084734	Chromosome 3	3084784	DEL	6.08023e-09	0.00119493	-30.3849	SV	Sobic.003G033500	3066533	3067815	dof27	dof zinc finger protein DOF3.4
Total_fresh_weight	sv_133151_Chr03_4737368	Chromosome 3	4737368	Chromosome 7	6231794	TRA	3.51688e-11	1.08855e-05	4.33778	SNP+SV	Sobic.003G052700	4756775	4761141	vt2	tryptophan aminotransferase-related protein 2
											Sobic.007G059600	6233483	6239958	-	LRR receptor kinase BAK1
Total_fresh_weight	sv_134840_Chr03_5700906	Chromosome 3	5700906	Chromosome 10	995525	TRA	5.8247e-10	0.000112641	2.80075	SNP+SV	Sobic.010G011200	976735	981903	-	ruBisCO large subunit-binding protein subunit beta, chloroplastic
Total_fresh_weight	sv_134990_Chr03_5773135	Chromosome 3	5773135	Chromosome 3	5773184	DEL	3.51688e-11	1.08855e-05	2.16889	SNP+SV	Sobic.003G068000	5756262	5757593	-	lysine-rich arabinogalactan protein 19
Total_fresh_weight	sv_135222_Chr03_5889610	Chromosome 3	5889610	Chromosome 3	5889906	DEL	3.51688e-11	1.08855e-05	2.16889	SNP+SV	Sobic.003G069000	5898809	5900660	-	hydroxycinnamoyltransferase 4-like
2015_Days_to_harvest	sv_140041_Chr03_8585196	Chromosome 3	8585196	Chromosome 3	8585313	DEL	4.5531e-11	2.23701e-06	-3.98058	SV	Sobic.003G096750	8562424	8564918	-	LEAF RUST 10 DISEASE-RESISTANCE LOCUS RECEPTOR-LIKE PROTEIN KINASE-like 2.7
Days_to_harvest	sv_140041_Chr03_8585196	Chromosome 3	8585196	Chromosome 3	8585313	DEL	1.81864e-14	2.68058e-09	-5.29944	SV
2014_NDF	sv_141474_Chr03_9395525	Chromosome 3	9395525	Chromosome 3	9460373	DEL	9.69939e-14	2.85928e-08	2.28764	SV
2014_NFC	sv_141474_Chr03_9395525	Chromosome 3	9395525	Chromosome 3	9460373	DEL	6.33463e-10	9.3369e-05	-2.08839	SV
Anthesis_data	sv_142529_Chr03_10078798	Chromosome 3	10078798	Chromosome 3	10079129	DEL	6.61893e-08	0.00975595	6.42699	SV	Sobic.003G112200	10085747	10088662	-	germin-like protein 5-1
2014_NDF	sv_144056_Chr03_10999904	Chromosome 3	10999904	Chromosome 2	1251907	TRA	3.64092e-08	0.00306659	-6.50782	SV	Sobic.003G120900	10990146	10992269	-	peroxidase 9
											Sobic.003G121000	11015233	11017556	-	peroxidase 72
2015_NDF	sv_144059_Chr03_11004692	Chromosome 3	11004692	Chromosome 3	11008613	DEL	6.29403e-08	0.00618471	2.02484	SV
2015_Lignin	sv_144060_Chr03_11010582	Chromosome 3	11010582	Chromosome 2	63993905	TRA	6.56579e-08	0.0077421	1.06221	SV	Sobic.003G121000	11015233	11017556	-	peroxidase 72
Brix_maturity	sv_145890_Chr03_12266360	Chromosome 3	12266360	Chromosome 3	12266433	DEL	6.34255e-09	0.000747887	-0.476965	SV	Sobic.003G130900	12254255	12260463	-	glucosidase 2 subunit beta
2015_Dry_Weight	sv_148768_Chr03_15057634	Chromosome 3	15057634	Chromosome 1	19013981	TRA	6.56406e-08	0.00967508	0.100878	SV	Sobic.001G207800	19036746	19040290	-	WAT1-related protein At3g02690, chloroplastic
Total_fresh_weight	sv_150416_Chr03_17100718	Chromosome 3	17100718	Chromosome 2	72139188	TRA	5.8247e-10	0.000112641	2.80075	SNP+SV	Sobic.003G155800	17113462	17118555	-	dnaJ protein ERDJ3B
											Sobic.002G359200	72142948	72144625	-	transcription factor bHLH54
Total_fresh_weight	sv_150516_Chr03_17355474	Chromosome 3	17355474	Chromosome 3	17355552	DEL	3.51688e-11	1.08855e-05	2.16889	SNP+SV
2015_Days_to_harvest	sv_155471_Chr03_31442014	Chromosome 3	31442014	Chromosome 6	52699287	TRA	4.5291e-09	0.00583907	-16.4284	SNP+SV	Sobic.006G170100	52688488	52689180	-	ethylene-responsive transcription factor ERF039
											Sobic.006G170300	52713305	52716037	NAB1	carotenoid cleavage dioxygenase 7, chloroplastic
2014_Dry_Weight	sv_163761_Chr03_52556921	Chromosome 3	52556921	Chromosome 10	12826759	TRA	1.3806e-09	0.00177992	0.236891	SNP+SV	Sobic.003G199101	52574271	52595240	-	indole-2-monooxygenase
Dry_Weight	sv_163761_Chr03_52556921	Chromosome 3	52556921	Chromosome 10	12826759	TRA	2.39769e-09	0.00231838	0.182271	SNP+SV
Photoperiod_sensitivity	sv_163852_Chr03_52705982	Chromosome 3	52705982	Chromosome 3	52706061	DEL	3.1283e-22	9.2219e-17	0.162733	SV
2015_NDF	sv_164203_Chr03_53150631	Chromosome 3	53150631	Chromosome 3	53153089	DEL	7.72104e-08	0.00650309	1.05548	SV
2014_NDF	sv_166440_Chr03_54924633	Chromosome 3	54924633	Chromosome 1	18350735	TRA	4.71967e-09	0.000556524	8.98577	SV	Sobic.001G201900	18351235	18358459	-	folylpolyglutamate synthase
Total_fresh_weight	sv_169755_Chr03_57456273	Chromosome 3	57456273	Chromosome 3	57456557	DEL	4.64387e-11	1.08855e-05	1.88817	SNP+SV	Sobic.003G235800	57437629	57442175	-	auxin efflux carrier component 3a
											Sobic.003G235900	57452999	57457769	-	homeobox-leucine zipper protein HOX3
											Sobic.003G236000	57471900	57478927	-	mitogen-activated protein kinase 16
Total_fresh_weight	sv_169794_Chr03_57467660	Chromosome 3	57467660	Chromosome 3	57467906	DEL	4.64387e-11	1.08855e-05	1.88817	SNP+SV	Sobic.003G235900	57452999	57457769	-	homeobox-leucine zipper protein HOX3
											Sobic.003G236000	57471900	57478927	-	mitogen-activated protein kinase 16
Total_fresh_weight	sv_170044_Chr03_57700522	Chromosome 3	57700522	Chromosome 1|Chromosome 1|Chromosome 1|Chromosome 2|Chromosome 4|Chromosome 4|Chromosome 6|Chromosome 6|Chromosome 9|Chromosome 10|Chromosome 10|Chromosome 10	67520112|69922619|78200400|3859607|2684273|55871080|29368323|35943399|46322261|2915308|12673718|56642251	TRA	4.3232e-09	0.000367491	3.70975	SNP+SV	Sobic.003G237500	57692008	57692271	-	protein RESPONSE TO LOW SULFUR 3
											Sobic.003G237900	57719603	57725845	-	potassium channel AKT1
											Sobic.001G388100	67521480	67523056	-	late embryogenesis abundant protein 1
											Sobic.001G388300	67536978	67540503	-	ABSCISIC ACID-INSENSITIVE 5-like protein 2
											Sobic.001G418100	69901718	69905944	-	UDP-glucuronic acid decarboxylase 6
											Sobic.001G514900	78200309	78206133	-	probable acyl-activating enzyme 1, peroxisomal
											Sobic.002G039400	3839232	3847962	-	protein YABBY 1
											Sobic.004G033300	2673887	2681593	-	myb-binding protein 1A-like protein
											Sobic.009G117800	46298990	46302547	-	scarecrow-like protein 3
											Sobic.009G118300	46337787	46343799	-	protein BONZAI 3
											Sobic.010G224400	56622387	56631581	-	probable potassium transporter 13
											Sobic.010G224501	56635200	56636603	-	auxin-responsive protein SAUR71
Total_fresh_weight	sv_170072_Chr03_57702095	Chromosome 3	57702095	Chromosome 10	12673729	TRA	4.64387e-11	1.08855e-05	3.77634	SNP+SV	Sobic.003G237500	57692008	57692271	-	protein RESPONSE TO LOW SULFUR 3
Total_fresh_weight	sv_172663_Chr03_59403556	Chromosome 3	59403556	Chromosome 1	79768823|79768756	TRA	4.64387e-11	1.08855e-05	3.77634	SNP+SV	Sobic.001G534300	79751327	79756004	-	trihelix transcription factor GTL1
Total_fresh_weight	sv_174625_Chr03_60530098	Chromosome 3	60530098	Chromosome 3	60530637	DEL	1.72597e-09	0.000241221	1.52232	SNP+SV	Sobic.003G268700	60531879	60533602	-	mitogen-activated protein kinase kinase kinase A-like
Total_fresh_weight	sv_174710_Chr03_60579639	Chromosome 3	60579639	Chromosome 3	60579933	DEL	2.06082e-09	0.000241221	4.54376	SNP+SV	Sobic.003G268800	60567216	60569238	-	mitogen-activated protein kinase kinase kinase YODA
											Sobic.003G268900	60572698	60575521	-	mitogen-activated protein kinase kinase kinase 2
											Sobic.003G269000	60581378	60582962	-	mitogen-activated protein kinase kinase kinase 3
2014_NFC	sv_175310_Chr03_60930263	Chromosome 3	60930263	Chromosome 3	60930843	DEL	1.7133e-08	0.00126266	4.73101	SV	Sobic.003G273200	60921993	60925068	-	transcription factor bHLH84
2015_Lignin	sv_177363_Chr03_62516873	Chromosome 3	62516873	Chromosome 3	62523868	INV	1.70821e-08	0.00335707	1.66211	SV	Sobic.003G292500	62493175	62501387	-	protein cereblon homolog
2015_NDF	sv_177363_Chr03_62516873	Chromosome 3	62516873	Chromosome 3	62523868	INV	9.2173e-09	0.00181144	11.6755	SV	Sobic.003G292932	62537633	62538423	-	casein kinase 1-like protein HD16
Brix_maturity	sv_179220_Chr03_64765162	Chromosome 3	64765162	Chromosome 3	64768413	INV	8.85909e-12	2.61157e-06	-5.09267	SV	Sobic.003G319800	64752392	64755562	-	transcription factor bHLH112-like
2015_Days_to_harvest	sv_180842_Chr03_66313225	Chromosome 3	66313225	Chromosome 3	66313342	DEL	2.76098e-09	0.00583907	-10.1819	SNP+SV	Sobic.003G340300	66324795	66327389	-	protein NUCLEAR FUSION DEFECTIVE 4
Days_to_harvest	sv_180842_Chr03_66313225	Chromosome 3	66313225	Chromosome 3	66313342	DEL	2.70321e-09	0.00275488	-9.27658	SNP+SV
Photoperiod_sensitivity	sv_181289_Chr03_66763788	Chromosome 3	66763788	Chromosome 3	66768616	INV	2.43274e-10	1.0245e-05	0.705021	SV
Total_fresh_weight	sv_183802_Chr03_69016958	Chromosome 3	69016958	Chromosome 3	69017775	DEL	4.64387e-11	1.08855e-05	3.77634	SNP+SV	Sobic.003G375500	69015375	69018970	-	PHD finger protein At1g33420
Dry_tons_per_acre	snp_3_70671172	Chromosome 3	70671172	Chromosome 3	70671173	SNP	1.16616e-09	0.00416657	6.42115	SNP	Sobic.003G396600	70659296	70662320	-	histone deacetylase HDT3
2014_NDF	sv_188941_Chr03_72914662	Chromosome 3	72914662	Chromosome 3	72914908	DEL	6.53369e-08	0.00428014	-1.22095	SV
2014_NDF	sv_190116_Chr03_73750244	Chromosome 3	73750244	Chromosome 3	73750359	DEL	3.66607e-10	5.40359e-05	-2.53823	SV	Sobic.003G436800	73751376	73759914	-	cationic peroxidase SPC4-like
NDF	sv_190116_Chr03_73750244	Chromosome 3	73750244	Chromosome 3	73750359	DEL	9.02991e-09	0.00106477	-2.11723	SV
NFC	sv_190116_Chr03_73750244	Chromosome 3	73750244	Chromosome 3	73750359	DEL	2.05648e-10	3.03115e-05	2.91733	SV
ADF	sv_198874_Chr04_5487262	Chromosome 4	5487262	Chromosome 4	5492621	INV	1.09942e-09	0.000216065	4.74687	SV
Total_fresh_weight	sv_200023_Chr04_6173360	Chromosome 4	6173360	Chromosome 3	8512195	TRA	1.44049e-14	2.83094e-09	2.15073	SV	Sobic.004G075700	6149879	6170021	-	methyl-CpG-binding domain-containing protein 9
											Sobic.004G075900	6181585	6188705	-	glucomannan 4-beta-mannosyltransferase 1
											Sobic.003G096100	8499492	8501691	-	protein WALLS ARE THIN 1
Total_fresh_weight	sv_203967_Chr04_8663241	Chromosome 4	8663241	Chromosome 4	8663378	DUP	3.51688e-11	1.08855e-05	4.33778	SNP+SV	Sobic.004G010300	866843	869960	-	glycerol-3-phosphate 2-O-acyltransferase 6
Total_fresh_weight	sv_207087_Chr04_11004554	Chromosome 4	11004554	Chromosome 5	61181957	TRA	4.3232e-09	0.000367491	3.70975	SNP+SV	Sobic.004G111500	11010986	11012982	-	late embryogenesis abundant protein At3g53040
											Sobic.006G281900	61175531	61179561	-	NAC transcription factor 32
Total_fresh_weight	sv_208202_Chr04_12106151	Chromosome 4	12106151	Chromosome 1|Chromosome 5|Chromosome 5	69351093|53311251|67265931	TRA	4.64387e-11	1.08855e-05	1.88817	SNP+SV	Sobic.004G116100	12101470	12105836	-	50S ribosomal protein L21, chloroplastic
											Sobic.005G188000	67269303	67271135	-	NAC domain-containing protein 48
NDF	sv_210326_Chr04_14229368	Chromosome 4	14229368	Chromosome 4	14230774	DEL	1.92453e-10	2.83666e-05	1.4177	SV	Sobic.004G124800	14235238	14239251	-	galactoside 2-alpha-L-fucosyltransferase
2015_Dry_Weight	sv_210664_Chr04_15000278	Chromosome 4	15000278	Chromosome 4	15002374	DEL	1.5092e-13	8.89793e-08	0.173449	SV
2014_Days_to_harvest	sv_211127_Chr04_16061317	Chromosome 4	16061317	super_99	41302|49127	TRA	1.22587e-12	1.03249e-07	-7.71888	SV	Sobic.004G128100	16068918	16075291	-	ABC transporter E family member 2
2015_ADF	sv_211200_Chr04_16163699	Chromosome 4	16163699	Chromosome 4	16164168	DEL	7.6655e-10	0.000225971	-2.242	SV
2015_NFC	sv_213671_Chr04_23783935	Chromosome 4	23783935	Chromosome 4	23790737	DEL	8.13654e-08	0.00799522	-3.71912	SV
Stalk_height	sv_215053_Chr04_33490246	Chromosome 4	33490246	Chromosome 2	14708200	TRA	1.24069e-08	0.00182871	-30.8171	SV	Sobic.002G118200	14724112	14740548	-	protein TSS
Total_fresh_weight	sv_216137_Chr04_37307432	Chromosome 4	37307432	Chromosome 4	37307494	DEL	8.02499e-08	0.00675909	0.393857	SV
Dry_Weight	sv_217644_Chr04_42134472	Chromosome 4	42134472	Chromosome 4	42134597	DEL	6.06643e-12	1.19221e-06	-0.0408716	SV	Sobic.004G142400	42125144	42147835	-	protein MICRORCHIDIA 7
2014_Days_to_harvest	sv_218311_Chr04_43691353	Chromosome 4	43691353	Chromosome 4	43691452	DEL	6.13071e-12	4.01615e-07	-3.94941	SV
WSC	sv_220057_Chr04_47073349	Chromosome 4	47073349	Chromosome 7	8023557	TRA	1.07016e-12	3.15473e-07	19.0168	SV	Sobic.004G149800	47076333	47092304	DME	protein ROS1
											Sobic.007G071900	8015505	8021213	-	obg-like ATPase 1
Photoperiod_sensitivity	sv_221731_Chr04_49816546	Chromosome 4	49816546	Chromosome 4	49817111	DEL	2.1966e-17	3.23767e-12	-0.119898	SV	Sobic.004G157100	49817844	49821068	-	bidirectional sugar transporter SWEET15
2015_NFC	sv_222038_Chr04_50233443	Chromosome 4	50233443	Chromosome 4	50234640	DEL	2.99874e-10	5.89332e-05	-1.65315	SV
Dry_tons_per_acre	sv_227031_Chr04_53710049	Chromosome 4	53710049	Chromosome 2	3841635	TRA	2.60071e-09	0.000383331	-8.79193	SV	Sobic.002G039400	3839232	3847962	-	protein YABBY 1
ADF	sv_232098_Chr04_56538107	Chromosome 4	56538107	Chromosome 4	56538319	DEL	2.77595e-09	0.00709391	-3.57375	SNP+SV	Sobic.004G215400	56536262	56537411	-	protein STRICTOSIDINE SYNTHASE-LIKE 10
NDF	sv_232098_Chr04_56538107	Chromosome 4	56538107	Chromosome 4	56538319	DEL	9.78449e-11	0.000332127	-5.23399	SNP+SV	Sobic.004G215500	56540847	56542844	-	GDSL esterase/lipase LTL1-like
NFC	sv_232098_Chr04_56538107	Chromosome 4	56538107	Chromosome 4	56538319	DEL	5.9196e-10	0.00065415	5.71433	SNP+SV
Total_fresh_weight	sv_241686_Chr04_63394359	Chromosome 4	63394359	Chromosome 4	63394423	DEL	7.72364e-08	0.00675909	0.330769	SV	Sobic.004G294000	63395314	63397314	-	acyl-acyl carrier protein thioesterase ATL4, chloroplastic
											Sobic.004G294100	63406167	63407341	-	zinc finger protein ZAT1
WSC	sv_241813_Chr04_63488948	Chromosome 4	63488948	Chromosome 4	63489373	DEL	4.86434e-09	0.00342069	5.98179	SNP+SV	Sobic.004G295100	63501044	63502618	-	aquaporin TIP2-1
ADF	sv_242079_Chr04_63675270	Chromosome 4	63675270	Chromosome 4	64018634	DUP	2.99409e-10	0.00160923	-7.10928	SNP+SV	Sobic.004G297900	63728789	63730293	-	uclacyanin-3
NDF	sv_242079_Chr04_63675270	Chromosome 4	63675270	Chromosome 4	64018634	DUP	1.55045e-09	0.00109031	-9.09203	SNP+SV	Sobic.004G297950	63738202	63739250	-	vegetative cell wall protein gp1
NFC	sv_242079_Chr04_63675270	Chromosome 4	63675270	Chromosome 4	64018634	DUP	3.44569e-09	0.00166586	10.1656	SNP+SV	Sobic.004G298700	63796124	63798436	-	glycine-rich cell wall structural protein 2
NFC	sv_243168_Chr04_64568436	Chromosome 4	64568436	Chromosome 6	47045887	TRA	4.67095e-09	0.000550778	6.45634	SV	Sobic.004G308100	64570470	64571988	-	cell number regulator 1
WSC	sv_243168_Chr04_64568436	Chromosome 4	64568436	Chromosome 6	47045887						Sobic.004G308200	64580292	64584876	-	galactoside 2-alpha-L-fucosyltransferase
NDF	sv_243168_Chr04_64568436	Chromosome 4	64568436	Chromosome 6	47045887	TRA	1.28808e-10	0.000332127	-10.5618	SNP+SV	Sobic.004G308300	64585450	64588440	-	galactoside 2-alpha-L-fucosyltransferase
											Sobic.006G099700	47044379	47047015	-	esterase AGAP003155
NDF	sv_244267_Chr04_65427971	Chromosome 4	65427971	Chromosome 4	65435299	DEL	1.87944e-11	3.69359e-06	1.66436	SV
2015_Days_to_harvest	sv_246385_Chr04_67056721	Chromosome 4	67056721	Chromosome 4|Chromosome 3|Chromosome 1|Chromosome 3|Chromosome 10|Chromosome 3|Chromosome 6|Chromosome 5	67058444|73561884|64081035|7349633|55715023|67718856|57786935|3992107	INV|TRA|TRA|TRA|TRA|TRA|TRA|TRA	1.50313e-09	5.90811e-05	-3.74147	SV	Sobic.001G351100	64072396	64074303	-	metacaspase-1
											Sobic.001G351200	64076006	64078731	-	metacaspase-1
											Sobic.001G351400	64086170	64088052	-	metacaspase-1-like
											Sobic.003G359800	67707080	67709616	-	transcription factor DIVARICATA
											Sobic.003G433500	73542183	73547527	SR45	serine/arginine-rich splicing factor SR45
											Sobic.006G236600	57805969	57807417	-	transcription factor ILI1
											Sobic.010G214200	55719173	55720354	-	F-box protein AFR
Sorghum_type	sv_255148_Chr05_3738532	Chromosome 5	3738532	Chromosome 3	516433	TRA	7.66255e-08	0.00501964	1.26744	SV	Sobic.005G041000	3752910	3754928	-	NAC domain-containing protein 2
											Sobic.003G005800	515147	518877	-	salt stress root protein RS1-like
											Sobic.003G005900	523944	531680	-	glycosyltransferase-like At2g41451
ADF	sv_256473_Chr05_4481744	Chromosome 5	4481744	Chromosome 1|Chromosome 4	72596488|60930855	TRA	4.22517e-08	0.00498215	1.82278	SV	Sobic.005G047100	4469547	4472327	-	actin-7
											Sobic.001G449000	72616460	72619320	-	heptahelical transmembrane protein ADIPOR3
											Sobic.004G264200	60911939	60913593	-	transcription factor bHLH83
NFC	snp_5_5046050	Chromosome 5	5046050	Chromosome 5	5046051	SNP	1.25509e-09	0.00448433	4.81727	SNP
WSC	snp_5_5046050	Chromosome 5	5046050	Chromosome 5	5046051	SNP	3.09246e-09	0.0110491	4.74403	SNP
2014_ADF	sv_258782_Chr05_5543572	Chromosome 5	5543572	Chromosome 5	5543680|5543645	DEL|INV	2.80315e-08	0.00550893	-1.47363	SV	Sobic.005G054800	5554693	5556369	-	aldehyde oxidase GLOX
2014_NDF	sv_263437_Chr05_8291957	Chromosome 5	8291957	Chromosome 5	8292137	DEL	3.32247e-09	0.00642517	10.6665	SNP+SV	Sobic.005G070500	8284386	8287550	-	disease resistance protein RPM1
NDF	sv_263437_Chr05_8291957	Chromosome 5	8291957	Chromosome 5	8292137	DEL	5.61502e-10	0.000620492	9.42201	SNP+SV
NFC	sv_263437_Chr05_8291957	Chromosome 5	8291957	Chromosome 5	8292137	DEL	1.44378e-09	0.000819504	-10.503	SNP+SV
2014_Days_to_harvest	sv_266448_Chr05_10275518	Chromosome 5	10275518	Chromosome 3	11873596	TRA	1.12492e-17	1.65808e-12	-38.0018	SV	Sobic.003G128700	11868354	11871577	-	probable indole-3-pyruvate monooxygenase YUCCA10
Photoperiod_sensitivity	sv_266448_Chr05_10275518	Chromosome 5	10275518	Chromosome 3	11873596	TRA	2.42149e-10	1.0245e-05	-0.817613	SV
Dry_tons_per_acre	sv_266666_Chr05_10536029	Chromosome 5	10536029	Chromosome 5	10538378	DUP	1.40128e-09	0.000759524	9.54587	SNP+SV
Total_fresh_weight	sv_266666_Chr05_10536029	Chromosome 5	10536029	Chromosome 5	10538378	DUP	2.12954e-12	1.08855e-05	1.93443	SNP+SV
2014_Dry_Weight	sv_266668_Chr05_10536175	Chromosome 5	10536175	Chromosome 4	40965961	TRA	7.0822e-11	0.000182612	0.359504	SNP+SV
Dry_tons_per_acre	sv_266668_Chr05_10536175	Chromosome 5	10536175	Chromosome 4	40965961	TRA	1.23959e-11	4.79437e-05	11.5391	SNP+SV
Dry_Weight	sv_266668_Chr05_10536175	Chromosome 5	10536175	Chromosome 4	40965961	TRA	1.5563e-09	0.0017198	0.256789	SNP+SV
Total_fresh_weight	sv_266668_Chr05_10536175	Chromosome 5	10536175	Chromosome 4	40965961	TRA	1.01225e-09	0.000166598	1.74807	SNP+SV
2014_Dry_Weight	sv_266669_Chr05_10536324	Chromosome 5	10536324	Chromosome 7	4737807	TRA	1.06446e-15	3.13791e-10	0.256424	SV	Sobic.007G047300	4721073	4724503	COMT	caffeic acid 3-O-methyltransferase
Dry_tons_per_acre	sv_266669_Chr05_10536324	Chromosome 5	10536324	Chromosome 7	4737807	TRA	8.87678e-10	0.000174452	6.57654	SV	Sobic.007G047400	4745530	4757815	lhy	protein CCA1
Dry_Weight	sv_266669_Chr05_10536324	Chromosome 5	10536324	Chromosome 7	4737807	TRA	9.21528e-12	4.55988e-05	0.293558	SNP+SV
Total_fresh_weight	sv_266669_Chr05_10536324	Chromosome 5	10536324	Chromosome 7	4737807	TRA	9.11223e-12	1.08855e-05	1.97946	SNP+SV
Dry_tons_per_acre	snp_5_10544108	Chromosome 5	10544108	Chromosome 5	10544109	SNP	5.26635e-09	0.0090439	5.17955	SNP
Dry_tons_per_acre	snp_5_10548399	Chromosome 5	10548399	Chromosome 5	10548400	SNP	2.35169e-09	0.00560159	7.1998	SNP
Photoperiod_sensitivity	snp_5_26959393	Chromosome 5	26959393	Chromosome 5	26959394	SNP	7.906e-09	0.0196109	-0.381325	SNP
Total_fresh_weight	sv_281548_Chr05_50886906	Chromosome 5	50886906	Chromosome 5	50886962	DEL	4.64387e-11	1.08855e-05	1.88817	SNP+SV
2014_Dry_Weight	sv_282758_Chr05_52609207	Chromosome 5	52609207	Chromosome 5	52646839	DEL	5.25389e-09	0.00342166	0.159337	SNP+SV	Sobic.005G120600	52599529	52608690	-	putative squamosa promoter-binding-like protein 19
Dry_tons_per_acre	sv_282758_Chr05_52609207	Chromosome 5	52609207	Chromosome 5	52646839	DEL	1.91242e-10	0.000246556	5.54574	SNP+SV
Total_fresh_weight	sv_282758_Chr05_52609207	Chromosome 5	52609207	Chromosome 5	52646839	DEL	4.16002e-09	0.000367491	0.863093	SNP+SV
Dry_tons_per_acre	sv_283098_Chr05_53026154	Chromosome 5	53026154	Chromosome 5	53029137	DEL	4.87023e-09	0.00163796	4.73683	SNP+SV
Dry_tons_per_acre	sv_283146_Chr05_53116117	Chromosome 5	53116117	Chromosome 5	53121645	DEL	4.15758e-09	0.00153145	5.88773	SNP+SV
NFC	sv_283792_Chr05_54055818	Chromosome 5	54055818	Chromosome 5|Chromosome 1	54055934|33741148	DEL|TRA	4.04639e-08	0.00340809	4.3331	SV
Dry_tons_per_acre	sv_291278_Chr05_61867290	Chromosome 5	61867290	Chromosome 1|Chromosome 1|Chromosome 2|Chromosome 2|Chromosome 2|Chromosome 2|Chromosome 2|Chromosome 2|Chromosome 2|Chromosome 2|Chromosome 2|Chromosome 3|Chromosome 3|Chromosome 4|Chromosome 4|Chromosome 4|Chromosome 6|Chromosome 7|Chromosome 7|Chromosome 7|Chromosome 8|Chromosome 8|Chromosome 9|Chromosome 10	25902893|62983360|1518344|1688501|2157198|2169598|2177716|4542103|21624294|68197148|72822437|13888863|71471397|3768819|8257237|39313385|697740|1369174|2039686|2286465|883042|9020288|57528674|3774532	TRA	6.74095e-10	0.000579377	13.4036	SNP+SV	Sobic.001G246500	25879503	25888106	-	short integuments 2, mitochondrial
											Sobic.001G342400	62968268	62969946	-	SPX domain-containing protein 5
											Sobic.002G023300	2144771	2145509	-	pathogenesis-related protein PRB1-3
											Sobic.002G138700	21613286	21614284	-	protein SRC2 homolog
											Sobic.002G307600	68192316	68194479	-	GTPase activating protein 1
											Sobic.002G368600	72814868	72818387	-	UDP-arabinopyranose mutase 3
											Sobic.002G368700	72821925	72827165	-	MADS-box transcription factor 18
											Sobic.003G407200	71482355	71489364	-	calmodulin-binding transcription activator 4
											Sobic.007G015500	1360032	1363137	-	NAC domain-containing protein 35
											Sobic.007G015600	1369473	1370042	-	protein AUXIN-REGULATED GENE INVOLVED IN ORGAN SIZE
											Sobic.007G022000	2029763	2033207	-	importin subunit beta-1
											Sobic.008G010500	867350	869075	-	peroxidase 4
											Sobic.008G010800	892268	901825	-	long chain acyl-CoA synthetase 6, peroxisomal
											Sobic.009G237000	57534371	57539168	-	protease Do-like 1, chloroplastic
											Sobic.009G237100	57540825	57547713	-	probable sodium/metabolite cotransporter BASS4, chloroplastic
Total_fresh_weight	sv_291437_Chr05_61898805	Chromosome 5	61898805	Chromosome 7	6426207	TRA	4.3232e-09	0.000367491	3.70975	SNP+SV	Sobic.005G150100	61901274	61902468	-	extensin-2-like
2014_Days_to_harvest	sv_291562_Chr05_61994517	Chromosome 5	61994517	Chromosome 5	61995165	DEL	6.35572e-11	3.40655e-06	-9.1492	SV	Sobic.005G150900	61984980	61988110	-	growth-regulating factor 8-like
Days_to_harvest	sv_291562_Chr05_61994517	Chromosome 5	61994517	Chromosome 5	61995165	DEL	3.43905e-16	1.0138e-10	-15.3963	SV
Total_fresh_weight	sv_295544_Chr05_64140351	Chromosome 5	64140351	Chromosome 1	24484800	TRA	2.06082e-09	0.000241221	4.54376	SNP+SV	Sobic.005G165500	64134373	64139920	-	subtilisin-like protease SBT3.9
											Sobic.001G238400	24481079	24482375	-	expansin-A31
Total_fresh_weight	sv_295651_Chr05_64205008	Chromosome 5	64205008	Chromosome 10	18563515	TRA	2.06082e-09	0.000241221	4.54376	SNP+SV	Sobic.005G165566	64206132	64206488	-	non-specific lipid transfer protein GPI-anchored 2
											Sobic.005G165800	64217562	64225842	-	protein ROOT HAIR DEFECTIVE 3 homolog 2
											Sobic.010G133000	18563207	18564509	-	protein LE25
Total_fresh_weight	sv_298438_Chr05_65527114	Chromosome 5	65527114	Chromosome 5	65527427	DEL	6.32459e-15	1.86442e-09	1.70018	SV	Sobic.005G175100	65515595	65520352	-	DEAD-box ATP-dependent RNA helicase 52C
Total_fresh_weight	sv_298483_Chr05_65544066	Chromosome 5	65544066	Chromosome 5	65545403	DUP	9.71833e-10	0.000163424	3.07227	SNP+SV
Total_fresh_weight	sv_298540_Chr05_65605173	Chromosome 5	65605173	Chromosome 5	65632728	DUP	9.71833e-10	0.000163424	1.53613	SNP+SV
Total_fresh_weight	sv_298569_Chr05_65626579	Chromosome 5	65626579	Chromosome 1	35722026	TRA	9.71833e-10	0.000163424	3.07227	SNP+SV
Total_fresh_weight	sv_298640_Chr05_65685726	Chromosome 5	65685726	Chromosome 5	65685777	DEL	4.64387e-11	1.08855e-05	1.88817	SNP+SV
2014_NFC	sv_299709_Chr05_66385860	Chromosome 5	66385860	Chromosome 5	66386362	DEL	3.82277e-10	7.51275e-05	-2.41868	SV	Sobic.005G180800	66366701	66369587	-	thioredoxin domain-containing protein PLP3B-like
WSC	sv_299709_Chr05_66385860	Chromosome 5	66385860	Chromosome 5	66386362	DEL	4.924e-09	0.000414726	-2.01819	SV	Sobic.005G181200	66403107	66405542	-	L-type lectin-domain containing receptor kinase IX.1
Sorghum_type	sv_301442_Chr05_67199417	Chromosome 5	67199417	Chromosome 5	67202358	DEL	5.28961e-11	3.11864e-05	-0.467777	SV	Sobic.005G187000	67191159	67193132	-	cyclin-dependent kinase inhibitor 3-like
											Sobic.005G187300	67221203	67228850	-	phosphatidate phosphatase PAH2
Total_fresh_weight	sv_301494_Chr05_67255974	Chromosome 5	67255974	Chromosome 5	67256126	DUP	4.64387e-11	1.08855e-05	1.88817	SNP+SV	Sobic.005G187500	67236800	67240653	-	GRF1-interacting factor 2
											Sobic.005G188000	67269303	67271135	-	NAC domain-containing protein 48
Total_fresh_weight	sv_301525_Chr05_67265927	Chromosome 5	67265927	Chromosome 4	12106155	TRA	4.64387e-11	1.08855e-05	1.88817	SNP+SV	Sobic.005G188000	67269303	67271135	-	NAC domain-containing protein 48
2014_Days_to_harvest	sv_304154_Chr05_68603724	Chromosome 5	68603724	Chromosome 5	68603803|68604062	DEL	4.11421e-10	2.02138e-05	10.1763	SV	Sobic.005G200300	68592688	68597013	-	probable aminotransferase TAT2
											Sobic.005G200600	68618915	68619813	-	dirigent protein 21
2014_Days_to_harvest	sv_307141_Chr05_69977120	Chromosome 5	69977120	Chromosome 4	51681648	TRA	6.10454e-10	2.76855e-05	-12.1671	SV	Sobic.005G213500	69978777	69981181	-	protein SRG1
Sorghum_type	sv_307415_Chr05_70134529	Chromosome 5	70134529	Chromosome 5	70134893	DEL	6.44074e-08	0.00474666	0.246602	SV	Sobic.005G215300	70130797	70134868	-	laccase-15
2015_Days_to_harvest	sv_308360_Chr05_70602910	Chromosome 5	70602910	Chromosome 4	58024985	TRA	6.03261e-19	1.77835e-13	-8.99105	SV	Sobic.005G219300	70590297	70603175	-	disease resistance protein RPP13
											Sobic.004G230650	58016630	58018585	-	protein FAR1-RELATED SEQUENCE 5
2014_ADF	sv_312289_Chr06_846495	Chromosome 6	846495	Chromosome 6	846671	DEL	1.14683e-10	3.38074e-05	-3.42417	SV
NDF	sv_312289_Chr06_846495	Chromosome 6	846495	Chromosome 6	846671	DEL	7.62611e-08	0.00562024	-2.31709	SV
ADF	sv_312289_Chr06_846495	Chromosome 6	846495	Chromosome 6	846671	DEL	4.16069e-10	0.00160923	-4.1207	SNP+SV
Photoperiod_sensitivity	sv_313524_Chr06_1411951	Chromosome 6	1411951	Chromosome 6	1412136	DEL	3.52111e-23	2.07597e-17	-0.193793	SV
Total_fresh_weight	snp_6_2746384	Chromosome 6	2746384	Chromosome 6	2746385	SNP	5.03858e-09	0.0120016	0.708916	SNP
Photoperiod_sensitivity	snp_6_3971505	Chromosome 6	3971505	Chromosome 6	3971506	SNP	3.45574e-09	0.0196109	0.390481	SNP	Sobic.006G022800	3973663	3974940	-	senescence-specific cysteine protease SAG39
											Sobic.006G022900	3979834	3982221	-	indole-2-monooxygenase
2014_NFC	sv_319415_Chr06_5634979	Chromosome 6	5634979	Chromosome 6	5635689	DEL	1.4831e-08	0.00124915	12.9568	SV
Days_to_harvest	sv_320459_Chr06_6387131	Chromosome 6	6387131	Chromosome 6	6387374	DEL	4.61298e-15	9.06572e-10	5.85778	SV	Sobic.006G030200	6400999	6404761	-	transcription factor RAX2
Brix_maturity	sv_321100_Chr06_6774006	Chromosome 6	6774006	Chromosome 6	6774134	DEL	6.42914e-13	3.79049e-07	1.24393	SV
2014_Days_to_harvest	sv_321829_Chr06_8374759	Chromosome 6	8374759	Chromosome 6	8388681	DEL	1.99292e-31	1.17498e-25	7.61579	SV
Stalk_height	sv_324691_Chr06_15373857	Chromosome 6	15373857	Chromosome 6	15374108	DEL	9.26285e-20	5.46118e-14	-88.1835	SV
2014_Days_to_harvest	snp_6_21356911	Chromosome 6	21356911	Chromosome 6	21356912	SNP	1.68351e-09	0.00214674	15.0876	SNP
2014_Days_to_harvest	snp_6_22470078	Chromosome 6	22470078	Chromosome 6	22470079	SNP	5.48786e-09	0.00247171	-14.8837	SNP
2014_Days_to_harvest	snp_6_22772727	Chromosome 6	22772727	Chromosome 6	22772728	SNP	3.17821e-09	0.00214674	-19.1151	SNP
2014_Days_to_harvest	snp_6_23316296	Chromosome 6	23316296	Chromosome 6	23316297	SNP	3.20364e-09	0.00214674	-16.908	SNP
2014_Days_to_harvest	snp_6_23334870	Chromosome 6	23334870	Chromosome 6	23334871	SNP	1.64296e-09	0.00214674	-14.3643	SNP
2014_Days_to_harvest	snp_6_23334872	Chromosome 6	23334872	Chromosome 6	23334873	SNP	5.88023e-09	0.00247171	-11.2685	SNP
2014_Days_to_harvest	snp_6_23335984	Chromosome 6	23335984	Chromosome 6	23335985	SNP	3.78653e-09	0.00225482	-17.0383	SNP
2014_Days_to_harvest	snp_6_23360317	Chromosome 6	23360317	Chromosome 6	23360318	SNP	3.3046e-09	0.00214674	-17.1157	SNP
2014_Days_to_harvest	snp_6_23601690	Chromosome 6	23601690	Chromosome 6	23601691	SNP	2.73501e-09	0.00214674	-15.8957	SNP
Days_to_harvest	snp_6_23601690	Chromosome 6	23601690	Chromosome 6	23601691	SNP	6.42981e-09	0.00574329	-15.0125	SNP
2014_Days_to_harvest	snp_6_23604346	Chromosome 6	23604346	Chromosome 6	23604347	SNP	1.87175e-09	0.00214674	-16.0567	SNP
Days_to_harvest	snp_6_23604346	Chromosome 6	23604346	Chromosome 6	23604347	SNP	2.91961e-09	0.0041726	-15.3645	SNP
2014_Days_to_harvest	snp_6_29588864	Chromosome 6	29588864	Chromosome 6	29588865	SNP	5.7203e-09	0.00247171	-15.6742	SNP
2014_Days_to_harvest	snp_6_29591895	Chromosome 6	29591895	Chromosome 6	29591896	SNP	5.21891e-09	0.00247171	-15.8331	SNP	Sobic.006G042900	29565542	29569247	-	protein FAR1-RELATED SEQUENCE 1
2014_Days_to_harvest	snp_6_30370679	Chromosome 6	30370679	Chromosome 6	30370680	SNP	6.22864e-09	0.00247271	16.0911	SNP
2015_Days_to_harvest	snp_6_30370679	Chromosome 6	30370679	Chromosome 6	30370680	SNP	5.28626e-09	0.0160835	17.063	SNP
Days_to_harvest	snp_6_30370679	Chromosome 6	30370679	Chromosome 6	30370680	SNP	1.13339e-09	0.00404949	16.3187	SNP
2014_Days_to_harvest	snp_6_30372209	Chromosome 6	30372209	Chromosome 6	30372210	SNP	1.10928e-09	0.00214674	18.3105	SNP
Days_to_harvest	snp_6_30372209	Chromosome 6	30372209	Chromosome 6	30372210	SNP	8.63609e-10	0.00404949	17.7807	SNP
2014_Days_to_harvest	snp_6_30373675	Chromosome 6	30373675	Chromosome 6	30373676	SNP	2.52856e-09	0.00214674	17.7533	SNP
Days_to_harvest	snp_6_30373675	Chromosome 6	30373675	Chromosome 6	30373676	SNP	2.23514e-09	0.0041726	17.1792	SNP
2014_Days_to_harvest	snp_6_30374491	Chromosome 6	30374491	Chromosome 6	30374492	SNP	2.07171e-09	0.00214674	16.2987	SNP
Days_to_harvest	snp_6_30374491	Chromosome 6	30374491	Chromosome 6	30374492	SNP	2.52851e-09	0.0041726	15.6777	SNP
Stalk_height	sv_329237_Chr06_31564751	Chromosome 6	31564751	Chromosome 6	31564851|31565251	INV|DEL	2.28332e-09	0.00353248	-106.742	SNP+SV
2014_Days_to_harvest	sv_329857_Chr06_32166494	Chromosome 6	32166494	Chromosome 10	53022838	TRA	3.5823e-08	0.00117336	-5.21448	SV	Sobic.006G045901	32164441	32165711	-	auxin response factor 4
Brix_maturity	sv_331436_Chr06_35964015	Chromosome 6	35964015	Chromosome 1|Chromosome 4|Chromosome 1|Chromosome 9|Chromosome 9	76724684|56778278|5147090|58061026|58181014	TRA	1.06368e-08	0.0010452	-2.46654	SV	Sobic.001G067800	5130324	5135683	-	zinc transporter ZTP29
											Sobic.001G497300	76733239	76741594	-	serine/threonine-protein kinase EDR1
											Sobic.009G245000	58073718	58079719	-	glucose-1-phosphate adenylyltransferase large subunit, chloroplastic/amyloplastic
											Sobic.009G246100	58167573	58169699	-	PLASMODESMATA CALLOSE-BINDING PROTEIN 2
Photoperiod_sensitivity	sv_333502_Chr06_39796168	Chromosome 6	39796168	Chromosome 4|Chromosome 5	6179965|10603531	TRA	3.41751e-09	0.000125931	0.342894	SV	Sobic.006G055501	39811161	39817450	MIR169d	uncharacterized LOC110436250
											Sobic.004G075700	6149879	6170021	-	methyl-CpG-binding domain-containing protein 9
Stalk_height	sv_333933_Chr06_40201405	Chromosome 6	40201405	Chromosome 5	13379318	TRA	8.11049e-08	0.00796962	-49.2697	SV	Sobic.005G091000	13385819	13393117	-	leucine-rich repeat receptor-like serine/threonine-protein kinase BAM1
2015_NDF	sv_334129_Chr06_40383500	Chromosome 6	40383500	Chromosome 6	40389545	DEL	1.31618e-08	0.00193998	2.72638	SV
Days_to_harvest	sv_334336_Chr06_40527826	Chromosome 6	40527826	Chromosome 6	40528025	DEL	5.68369e-09	0.0036638	-6.49991	SNP+SV	Sobic.006G058600	40516329	40524482	-	protein MEI2-like 4
Dry_Weight	sv_334546_Chr06_40722938	Chromosome 6	40722938	Chromosome 6	40722995	DEL	2.09113e-12	6.16444e-07	0.0395744	SV	Sobic.006G058732	40717771	40721654	-	ethylene-responsive transcription factor ERF115
2014_Lignin	sv_335012_Chr06_41271672	Chromosome 6	41271672	Chromosome 6	41271825	DEL	2.06965e-08	0.00305056	0.731309	SV	Sobic.006G060900	41270669	41272262	-	protein PYRICULARIA ORYZAE RESISTANCE 21
Lignin	sv_335012_Chr06_41271672	Chromosome 6	41271672	Chromosome 6	41271825	DEL	2.212e-09	0.000652075	0.526449	SV
Sorghum_type	sv_336942_Chr06_42706231	Chromosome 6	42706231	Chromosome 6	42706364	DEL	4.89037e-08	0.00467276	0.231711	SV	Sobic.006G066700	42702584	42706502	-	F-box/FBD/LRR-repeat protein At1g13570
											Sobic.006G066800	42707963	42717710	-	1,4-alpha-glucan-branching enzyme 2, chloroplastic/amyloplastic
Dry_Weight	sv_338855_Chr06_44087613	Chromosome 6	44087613	Chromosome 6	44090269	DEL	8.13479e-08	0.00799351	-0.174597	SV	Sobic.006G076500	44100254	44102754	-	transcription factor TCP20
2015_Days_to_harvest	sv_342276_Chr06_46062181	Chromosome 6	46062181	Chromosome 4	56429210	TRA	1.77622e-12	9.52018e-08	-19.9298	SV	Sobic.006G090700	46076764	46079358	-	protein FAR1-RELATED SEQUENCE 11
											Sobic.004G214400	56412617	56415293	-	protein TIC 20-I, chloroplastic
ADF	sv_343852_Chr06_47054989	Chromosome 6	47054989	Chromosome 6	47055639	DEL	7.73788e-08	0.00760349	3.26874	SV
WSC	sv_347908_Chr06_49431534	Chromosome 6	49431534	Chromosome 6	49431722	DEL	8.90939e-11	1.75093e-05	-3.81819	SV	Sobic.006G130100	49449343	49455135	-	CMP-sialic acid transporter 4
Total_fresh_weight	sv_348846_Chr06_50087729	Chromosome 6	50087729	Chromosome 6	50087789	DEL	4.58196e-09	0.000385253	2.10168	SNP+SV	Sobic.006G138500	50077343	50082330	-	calmodulin-binding receptor-like cytoplasmic kinase 3
2015_Days_to_harvest	sv_353136_Chr06_52509477	Chromosome 6	52509477	Chromosome 6	52509566	DEL	5.39877e-13	3.81016e-08	-9.7359	SV	Sobic.006G167900	52514924	52516754	-	ethylene-responsive transcription factor 6
2015_ADF	sv_353459_Chr06_52720119	Chromosome 6	52720119	Chromosome 6	52720196	DEL	2.40441e-08	0.00283518	3.53897	SV	Sobic.006G170300	52713305	52716037	NAB1	carotenoid cleavage dioxygenase 7, chloroplastic
Days_to_harvest	sv_356721_Chr06_54737004	Chromosome 6	54737004	Chromosome 6	54737248	DEL	1.7616e-08	0.000944183	-9.11819	SV
2014_Days_to_harvest	sv_357072_Chr06_54964664	Chromosome 6	54964664	Chromosome 3	1947044	TRA	6.45063e-17	7.60631e-12	11.5791	SV	Sobic.003G022700	1958561	1961449	-	gibberellin 2-beta-dioxygenase 1
Days_to_harvest	sv_357072_Chr06_54964664	Chromosome 6	54964664	Chromosome 3	1947044	TRA	3.79548e-11	4.47546e-06	10.5437	SV
2015_Days_to_harvest	sv_357555_Chr06_55282958	Chromosome 6	55282958	Chromosome 8	5661120	TRA	5.65078e-15	8.32896e-10	-31.9079	SV	Sobic.006G201600	55289735	55293320	FL	probable transcription factor FL
Total_fresh_weight	sv_358805_Chr06_56128241	Chromosome 6	56128241	Chromosome 3	59418691	TRA	1.72597e-09	0.000241221	3.04464	SNP+SV	Sobic.006G212200	56118591	56121280	-	zinc transporter 3
Total_fresh_weight	sv_360289_Chr06_57000425	Chromosome 6	57000425	Chromosome 10	5553761	TRA	4.74975e-09	0.000395067	1.23884	SNP+SV	Sobic.006G224100	57019991	57029293	-	protein ROS1
											Sobic.010G069300	5565262	5567477	-	cytochrome P450 709B3
Total_fresh_weight	sv_362336_Chr06_58517927	Chromosome 6	58517927	Chromosome 6	58517977	DEL	3.30894e-09	0.00035063	1.65605	SNP+SV	Sobic.006G245500	58511644	58516401	-	AP2-like ethylene-responsive transcription factor AIL5
2014_NDF	sv_364119_Chr06_59945664	Chromosome 6	59945664	Chromosome 6	60434710|60434929	INV	4.59124e-08	0.00338362	-3.17096	SV	Sobic.006G267900	60103962	60105483	dof21	dof zinc finger protein DOF5.8
Total_fresh_weight	sv_365469_Chr06_60802604	Chromosome 6	60802604	Chromosome 6	60802661	DEL	3.30894e-09	0.00035063	1.65605	SNP+SV	Sobic.006G277100	60797371	60800752	-	WAT1-related protein At1g68170
Total_fresh_weight	sv_365556_Chr06_60828855	Chromosome 6	60828855	Chromosome 6	60830236	DEL	3.30894e-09	0.00035063	1.65605	SNP+SV	Sobic.006G277200	60822255	60826353	-	tubby-like F-box protein 7
Total_fresh_weight	sv_365628_Chr06_60840890	Chromosome 6	60840890	Chromosome 2	65899755	TRA	2.06082e-09	0.000241221	4.54376	SNP+SV	Sobic.006G277500	60834877	60837191	-	peroxidase 12
											Sobic.006G277550	60839229	60840639	-	peroxidase 10
											Sobic.006G277600	60846473	60847987	-	cationic peroxidase SPC4-like
											Sobic.006G277700	60850342	60851907	-	peroxidase 2
Dry_Weight	sv_368195_Chr07_1031530	Chromosome 7	1031530	Chromosome 7	1033015	INV	4.89157e-09	0.000576794	-0.205131	SV
2014_Lignin	sv_371939_Chr07_2924332	Chromosome 7	2924332	Chromosome 7	2924528	DEL	1.48704e-08	0.00292243	-0.692081	SV	Sobic.007G032900	2901040	2905870	-	LEAF RUST 10 DISEASE-RESISTANCE LOCUS RECEPTOR-LIKE PROTEIN KINASE-like 2.4
Total_fresh_weight	sv_373257_Chr07_3634083	Chromosome 7	3634083	Chromosome 2	51989532	TRA	4.64387e-11	1.08855e-05	3.77634	SNP+SV	Sobic.002G166150	51969835	51994748	-	wall-associated receptor kinase 5
2014_Dry_Weight	sv_375458_Chr07_4737806	Chromosome 7	4737806	Chromosome 5	10536325	TRA	2.21297e-10	0.000408627	0.363151	SNP+SV	Sobic.007G047300	4721073	4724503	COMT	caffeic acid 3-O-methyltransferase
Dry_tons_per_acre	sv_375458_Chr07_4737806	Chromosome 7	4737806	Chromosome 5	10536325	TRA	8.08747e-11	0.000183568	11.4776	SNP+SV	Sobic.007G047400	4745530	4757815	lhy	protein CCA1
Dry_Weight	sv_375458_Chr07_4737806	Chromosome 7	4737806	Chromosome 5	10536325	TRA	6.22804e-10	0.00145897	0.274451	SNP+SV
Total_fresh_weight	sv_379121_Chr07_6419493	Chromosome 7	6419493	Chromosome 7	6419568	DEL	2.06082e-09	0.000241221	2.27188	SNP+SV	Sobic.007G061100	6413341	6427344	-	transcription factor TGA6
Total_fresh_weight	sv_379124_Chr07_6420929	Chromosome 7	6420929	Chromosome 2	38649162	TRA	2.06082e-09	0.000241221	4.54376	SNP+SV	Sobic.007G061100	6413341	6427344	-	transcription factor TGA6
Total_fresh_weight	sv_379144_Chr07_6424086	Chromosome 7	6424086	Chromosome 7	6424144	DEL	4.3232e-09	0.000367491	1.85487	SNP+SV	Sobic.007G061100	6413341	6427344	-	transcription factor TGA6
Total_fresh_weight	sv_379147_Chr07_6426208	Chromosome 7	6426208	Chromosome 5	61898810	TRA	4.3232e-09	0.000367491	3.70975	SNP+SV	Sobic.007G061100	6413341	6427344	-	transcription factor TGA6
											Sobic.005G150100	61901274	61902468	-	extensin-2-like
2014_Days_to_harvest	sv_379509_Chr07_6597908	Chromosome 7	6597908	Chromosome 7	6598376	INV	4.45378e-26	1.31293e-20	29.4641	SV	Sobic.007G062800	6604330	6616295	-	histone-lysine N-methyltransferase ATXR3
2015_Dry_Weight	sv_383128_Chr07_9105871	Chromosome 7	9105871	Chromosome 7	9105924	DEL	3.33909e-09	0.00065622	0.0737379	SV	Sobic.007G077900	9105176	9122228	-	protein FORGETTER 1
2014_Dry_Weight	sv_383128_Chr07_9105871	Chromosome 7	9105871	Chromosome 7	9105924	DEL	5.90968e-09	0.00351644	0.168768	SNP+SV
Dry_Weight	sv_383128_Chr07_9105871	Chromosome 7	9105871	Chromosome 7	9105924	DEL	1.55251e-09	0.0017198	0.136765	SNP+SV
Photoperiod_sensitivity	sv_386951_Chr07_13257957	Chromosome 7	13257957	Chromosome 7	13258008	DEL	5.08064e-17	4.9924e-12	-0.542652	SV
2014_Days_to_harvest	sv_389063_Chr07_17336433	Chromosome 7	17336433	Chromosome 7	17336666	INV|DUP	3.05858e-08	0.00106075	-17.2421	SV
2015_Days_to_harvest	sv_390108_Chr07_19628351	Chromosome 7	19628351	Chromosome 7	19629622	DEL	5.81626e-13	3.81016e-08	-5.99189	SV
2014_Days_to_harvest	sv_392702_Chr07_29853938	Chromosome 7	29853938	Chromosome 7	29855669	INV	5.57631e-12	4.01615e-07	-18.3495	SV
WSC	sv_397934_Chr07_50000937	Chromosome 7	50000937	Chromosome 1	49395831	TRA	1.35539e-09	0.000133185	10.5993	SV	Sobic.007G115300	50004932	50007195	-	fasciclin-like arabinogalactan protein 15
											Sobic.001G264500	49414202	49415809	-	3-ketoacyl-CoA synthase 1
2014_Days_to_harvest	sv_398862_Chr07_51975951	Chromosome 7	51975951	Chromosome 4	64016045	TRA	2.15869e-08	0.000848479	-14.7523	SV
Photoperiod_sensitivity	sv_398862_Chr07_51975951	Chromosome 7	51975951	Chromosome 4	64016045	TRA	6.32529e-11	3.72926e-06	-0.724569	SV
Total_fresh_weight	sv_400054_Chr07_53516493	Chromosome 7	53516493	Chromosome 5|Chromosome 4	70394542|66421468	TRA	4.3232e-09	0.000367491	3.70975	SNP+SV	Sobic.004G330700	66404801	66407552	-	probable CCR4-associated factor 1 homolog 7
											Sobic.004G330900	66411112	66415897	-	two-component response regulator ORR23
Dry_tons_per_acre	sv_400344_Chr07_53906647	Chromosome 7	53906647	Chromosome 2	60434460	TRA	2.3892e-09	0.00108714	11.1668	SNP+SV	Sobic.002G211700	60423442	60424313	gkaf|k2g	glutelin-2
2015_Lignin	sv_402413_Chr07_55689511	Chromosome 7	55689511	Chromosome 7	55694131	DEL	2.87955e-08	0.0042443	0.190153	SV
Total_fresh_weight	sv_402819_Chr07_56044371	Chromosome 7	56044371	Chromosome 7	56045414	DEL	9.86721e-11	2.18077e-05	2.02334	SNP+SV	Sobic.007G135301	56046249	56061908	-	MADS-box transcription factor 23
Total_fresh_weight	sv_402844_Chr07_56045841	Chromosome 7	56045841	Chromosome 7	56045890	DEL	4.3232e-09	0.000367491	1.85487	SNP+SV	Sobic.007G135301	56046249	56061908	-	MADS-box transcription factor 23
Total_fresh_weight	sv_402848_Chr07_56051960	Chromosome 7	56051960	Chromosome 7	56053424	DEL	1.39964e-11	1.08855e-05	2.89973	SNP+SV	Sobic.007G135301	56046249	56061908	-	MADS-box transcription factor 23
Total_fresh_weight	sv_402936_Chr07_56149401	Chromosome 7	56149401	Chromosome 7	56207878	DUP	4.64387e-11	1.08855e-05	3.77634	SNP+SV	Sobic.007G135700	56156125	56157410	tb1	transcription factor TEOSINTE BRANCHED 1
2014_Dry_Weight	sv_403227_Chr07_56450068	Chromosome 7	56450068	Chromosome 8	2226197	TRA	5.64946e-08	0.00475829	-0.144341	SV	Sobic.007G137101	56463393	56469232	-	transcription factor MYB80
Sorghum_type	sv_403749_Chr07_56829149	Chromosome 7	56829149	Chromosome 7	56829207	DEL	6.53965e-09	0.00096391	-0.205217	SV	Sobic.007G139600	56795770	56818088	-	protein ENHANCED DISEASE RESISTANCE 2-like
Total_fresh_weight	sv_407116_Chr07_58710304	Chromosome 7	58710304	Chromosome 7	58711469	DEL	4.3232e-09	0.000367491	1.85487	SNP+SV	Sobic.007G153900	58690766	58695615	-	nitrate reductase [NADH]
											Sobic.007G154100	58712269	58713982	-	aspartic proteinase nepenthesin-1
NFC	sv_408037_Chr07_59230257	Chromosome 7	59230257	Chromosome 7	59243556	DEL	1.27094e-08	0.00124886	6.51627	SV
Lignin	sv_408642_Chr07_59530004	Chromosome 7	59530004	Chromosome 7	59531736	DEL	7.55851e-08	0.00891268	0.232915	SV	Sobic.007G160400	59510515	59514391	-	zinc-finger homeodomain protein 2
2015_Days_to_harvest	sv_408767_Chr07_59601790	Chromosome 7	59601790	Chromosome 7	59605742	INV	1.37998e-12	8.13609e-08	-12.8656	SV	Sobic.007G161500	59607468	59608684	-	protein PROTON GRADIENT REGULATION 5, chloroplastic
Brix_maturity	sv_410083_Chr07_60443256	Chromosome 7	60443256	Chromosome 7	60452423	DEL	3.02258e-10	0.00233809	1.28313	SNP+SV	Sobic.007G169900	60452611	60460708	-	fatty acyl-CoA reductase 1
2014_NDF	sv_410119_Chr07_60454594	Chromosome 7	60454594	Chromosome 7	60454670	DEL	7.98032e-09	0.000784172	-1.9545	SV	Sobic.007G169900	60452611	60460708	-	fatty acyl-CoA reductase 1
Sorghum_type	sv_410119_Chr07_60454594	Chromosome 7	60454594	Chromosome 7	60454670	DEL	6.30539e-10	0.00487747	0.376387	SNP+SV
Sorghum_type	sv_415311_Chr07_63094779	Chromosome 7	63094779	Chromosome 7	63095177	DEL	5.54791e-08	0.00467276	0.246942	SV
Total_fresh_weight	sv_415721_Chr07_63340148	Chromosome 7	63340148	Chromosome 7	63342648	DEL	1.05648e-09	0.000170257	1.74214	SNP+SV	Sobic.007G202700	63364872	63367258	-	exocyst complex component EXO70A1
2014_Dry_Weight	sv_416046_Chr07_63609123	Chromosome 7	63609123	Chromosome 7	63609370	DUP	3.65975e-09	0.00342166	0.321689	SNP+SV	Sobic.007G205600	63587290	63590582	-	putative L-ascorbate peroxidase 6
											Sobic.007G205700	63590940	63592836	-	chitinase-like protein 1
											Sobic.007G205800	63596530	63602687	-	chaperone protein dnaJ 10-like
Total_fresh_weight	snp_8_923199	Chromosome 8	923199	Chromosome 8	923200	SNP	1.74934e-09	0.00625025	0.878521	SNP	Sobic.008G011400	930210	932510	-	protein TRAUCO
2014_NFC	sv_423614_Chr08_1906721	Chromosome 8	1906721	Chromosome 1|Chromosome 8	74207472|1918400	TRA|INV	3.46286e-11	1.02082e-05	3.1402	SV	Sobic.008G021800	1907267	1909519	-	NAC transcription factor 25
											Sobic.001G469100	74191896	74200753	-	protein indeterminate-domain 2
Dry_tons_per_acre	sv_424025_Chr08_2002349	Chromosome 8	2002349	Chromosome 8	2002930|2002429|2002435|	DEL|INV|INV	5.46965e-09	0.00176291	13.1819	SNP+SV	Sobic.008G022500	1978464	1983728	-	probable galacturonosyltransferase 7
											Sobic.008G022600	1983975	1986149	-	calcium uniporter protein 6, mitochondrial
Dry_tons_per_acre	sv_425987_Chr08_2721608	Chromosome 8	2721608	Chromosome 8	2722632	DEL	1.00558e-08	0.00118573	3.84962	SV
2014_Dry_Weight	sv_428160_Chr08_3680946	Chromosome 8	3680946	Chromosome 8	3681068	DEL	3.77062e-17	2.22308e-11	0.0983947	SV
NDF	sv_429536_Chr08_4275210	Chromosome 8	4275210	Chromosome 3	71958839	TRA	5.944e-08	0.00562024	3.61036	SV	Sobic.008G043600	4269752	4276019	-	exocyst complex component EXO70A1
											Sobic.003G412200	71949155	71952033	-	transcription factor ICE1
											Sobic.003G412300	71957823	71965868	-	coiled-coil domain-containing protein SCD2
2015_NDF	sv_429993_Chr08_4598764	Chromosome 8	4598764	Chromosome 8	4599006	DEL	2.56253e-10	0.000495554	-4.61255	SNP+SV	Sobic.008G046700	4591222	4596201	-	nodulation-signaling pathway 2 protein
2015_NFC	sv_429993_Chr08_4598764	Chromosome 8	4598764	Chromosome 8	4599006	DEL	1.13055e-10	0.000185352	5.30126	SNP+SV
2015_WSC	sv_429993_Chr08_4598764	Chromosome 8	4598764	Chromosome 8	4599006	DEL	8.7141e-11	0.000134814	5.51081	SNP+SV
NDF	sv_429993_Chr08_4598764	Chromosome 8	4598764	Chromosome 8	4599006	DEL	1.75995e-09	0.0011345	-4.10195	SNP+SV
NFC	sv_429993_Chr08_4598764	Chromosome 8	4598764	Chromosome 8	4599006	DEL	5.8952e-10	0.00065415	4.83918	SNP+SV
WSC	sv_429993_Chr08_4598764	Chromosome 8	4598764	Chromosome 8	4599006	DEL	5.72529e-10	0.00110719	4.89583	SNP+SV
2015_NDF	sv_430005_Chr08_4606570	Chromosome 8	4606570	Chromosome 8	4606815	DEL	1.72422e-09	0.00266751	-4.30232	SNP+SV	Sobic.008G046700	4591222	4596201	-	nodulation-signaling pathway 2 protein
2015_NFC	sv_430005_Chr08_4606570	Chromosome 8	4606570	Chromosome 8	4606815	DEL	1.26035e-09	0.00139276	4.88508	SNP+SV
2015_WSC	sv_430005_Chr08_4606570	Chromosome 8	4606570	Chromosome 8	4606815	DEL	2.98641e-09	0.00231011	4.92144	SNP+SV
NDF	sv_430012_Chr08_4613184	Chromosome 8	4613184	Chromosome 8	4616973	DEL	4.67459e-13	1.37802e-07	-2.96661	SV	Sobic.008G046700	4591222	4596201	-	nodulation-signaling pathway 2 protein
2015_NDF	sv_430012_Chr08_4613184	Chromosome 8	4613184	Chromosome 8	4616973	DEL	4.24958e-09	0.00469603	-4.70034	SNP+SV
NFC	sv_430012_Chr08_4613184	Chromosome 8	4613184	Chromosome 8	4616973	DEL	2.62351e-09	0.00135293	5.11441	SNP+SV
2015_NFC	sv_430042_Chr08_4648140	Chromosome 8	4648140	Chromosome 8	4649111	DEL	5.18119e-08	0.00610945	2.30459	SV
2015_WSC	sv_430042_Chr08_4648140	Chromosome 8	4648140	Chromosome 8	4649111	DEL	1.12962e-13	2.22e-08	3.55409	SV
NFC	sv_430042_Chr08_4648140	Chromosome 8	4648140	Chromosome 8	4649111	DEL	1.36942e-11	2.69128e-06	2.93273	SV
2015_NDF	sv_430042_Chr08_4648140	Chromosome 8	4648140	Chromosome 8	4649111	DEL	2.47222e-10	0.000495554	-4.51543	SNP+SV
NDF	sv_430042_Chr08_4648140	Chromosome 8	4648140	Chromosome 8	4649111	DEL	3.20787e-09	0.00177244	-3.94245	SNP+SV
WSC	sv_430042_Chr08_4648140	Chromosome 8	4648140	Chromosome 8	4649111	DEL	2.05157e-09	0.00176331	4.62035	SNP+SV
2015_NDF	sv_430048_Chr08_4649322	Chromosome 8	4649322	Chromosome 8	4652363|4652428	DEL|INV	2.47222e-10	0.000495554	-4.51543	SNP+SV	Sobic.008G047000	4642363	4645287	-	actin-7-like
2015_NFC	sv_430048_Chr08_4649322	Chromosome 8	4649322	Chromosome 8	4652363|4652428	DEL|INV	5.82252e-11	0.000185352	5.27112	SNP+SV	Sobic.008G047400	4664024	4669091	-	tubby-like F-box protein 14
2015_WSC	sv_430048_Chr08_4649322	Chromosome 8	4649322	Chromosome 8	4652363|4652428	DEL|INV	6.8935e-11	0.000134814	5.42119	SNP+SV
NDF	sv_430048_Chr08_4649322	Chromosome 8	4649322	Chromosome 8	4652363|4652428	DEL|INV	3.20787e-09	0.00177244	-3.94245	SNP+SV
NFC	sv_430048_Chr08_4649322	Chromosome 8	4649322	Chromosome 8	4652363|4652428	DEL|INV	9.78402e-10	0.000819504	4.66738	SNP+SV
WSC	sv_430048_Chr08_4649322	Chromosome 8	4649322	Chromosome 8	4652363|4652428	DEL|INV	2.05157e-09	0.00176331	4.62035	SNP+SV
WSC	sv_430072_Chr08_4661968	Chromosome 8	4661968	Chromosome 8	4662329	DEL	9.24105e-10	0.000108967	2.7444	SV
2015_NDF	sv_430072_Chr08_4661968	Chromosome 8	4661968	Chromosome 8	4662329	DEL	2.25614e-09	0.00290869	-4.29039	SNP+SV
2015_NFC	sv_430072_Chr08_4661968	Chromosome 8	4661968	Chromosome 8	4662329	DEL	8.68228e-10	0.00111935	4.96071	SNP+SV
2015_WSC	sv_430072_Chr08_4661968	Chromosome 8	4661968	Chromosome 8	4662329	DEL	7.53912e-10	0.000971969	5.14319	SNP+SV
NDF	sv_430072_Chr08_4661968	Chromosome 8	4661968	Chromosome 8	4662329	DEL	4.97254e-09	0.00256431	-3.92905	SNP+SV
NFC	sv_430072_Chr08_4661968	Chromosome 8	4661968	Chromosome 8	4662329	DEL	1.37401e-09	0.000819504	4.66807	SNP+SV
2015_NDF	sv_430140_Chr08_4706968	Chromosome 8	4706968	Chromosome 8	4709380	DEL	5.26054e-09	0.00508655	-4.7613	SNP+SV	Sobic.008G047900	4715642	4717855	-	fibrous sheath CABYR-binding protein
2015_NFC	sv_430140_Chr08_4706968	Chromosome 8	4706968	Chromosome 8	4709380	DEL	2.71324e-09	0.0026235	5.46494	SNP+SV
2015_WSC	sv_430140_Chr08_4706968	Chromosome 8	4706968	Chromosome 8	4709380	DEL	2.9701e-09	0.00231011	5.62901	SNP+SV
Days_to_harvest	sv_431997_Chr08_5475455	Chromosome 8	5475455	Chromosome 4	67193653	TRA	4.16069e-09	0.000350437	-8.63691	SV
2014_Days_to_harvest	sv_431997_Chr08_5475455	Chromosome 8	5475455	Chromosome 4	67193653	TRA	7.47761e-10	0.00192578	-18.943	SNP+SV
2015_Days_to_harvest	sv_431997_Chr08_5475455	Chromosome 8	5475455	Chromosome 4	67193653	TRA	1.18077e-09	0.00493736	-19.8051	SNP+SV
ADF	sv_432063_Chr08_5495776	Chromosome 8	5495776	Chromosome 8	5495991|5496109	DEL	2.39311e-08	0.00352732	-1.23812	SV
NDF	sv_432078_Chr08_5497780	Chromosome 8	5497780	Chromosome 8	5498798	DEL	1.1748e-09	0.000924509	-4.75923	SNP+SV
NFC	sv_432078_Chr08_5497780	Chromosome 8	5497780	Chromosome 8	5498798	DEL	1.12056e-10	0.00065415	5.79717	SNP+SV
WSC	sv_432078_Chr08_5497780	Chromosome 8	5497780	Chromosome 8	5498798	DEL	6.58725e-11	0.00050955	5.93859	SNP+SV
Total_fresh_weight	sv_441621_Chr08_16537942	Chromosome 8	16537942	Chromosome 8	16538029	DEL	3.51688e-11	1.08855e-05	4.33778	SNP+SV
2015_Days_to_harvest	sv_444269_Chr08_26493157	Chromosome 8	26493157	Chromosome 8	26494270	DEL	4.14892e-08	0.00143889	-22.4674	SV
ADF	sv_452839_Chr08_50635540	Chromosome 8	50635540	Chromosome 4	56708883	TRA	1.45373e-10	4.49749e-05	-5.98493	SV	Sobic.004G217800	56726027	56727822	AMT1-2	ammonium transporter 1 member 2
Total_fresh_weight	sv_453371_Chr08_51022980	Chromosome 8	51022980	Chromosome 5	71236055	TRA	9.71833e-10	0.000163424	3.07227	SNP+SV	Sobic.005G225700	71215844	71217070	-	zinc finger protein ZAT5-like
Days_to_harvest	sv_461819_Chr08_56657252	Chromosome 8	56657252	Chromosome 7	3029422	TRA	1.39716e-08	0.000823738	-23.6534	SV
2014_Days_to_harvest	sv_470996_Chr08_61079051	Chromosome 8	61079051	Chromosome 8	61083117	DEL	1.00743e-09	4.24259e-05	-6.34762	SV
Days_to_harvest	sv_470996_Chr08_61079051	Chromosome 8	61079051	Chromosome 8	61083117	DEL	2.45572e-18	1.44784e-12	-12.362	SV
2015_Days_to_harvest	sv_470996_Chr08_61079051	Chromosome 8	61079051	Chromosome 8	61083117	DEL	1.27656e-09	0.00493736	-19.5726	SNP+SV
Brix_maturity	sv_472293_Chr08_61626335	Chromosome 8	61626335	Chromosome 10	23784533	TRA	2.72787e-08	0.00229756	-3.77935	SV
2014_NDF	sv_479329_Chr09_1956173	Chromosome 9	1956173	Chromosome 5	5759145	TRA	6.27206e-12	1.23263e-06	-11.7055	SV	Sobic.009G022100	1973814	1977730	RS2Z39	serine/arginine-rich splicing factor RS2Z32
2014_NFC	sv_479329_Chr09_1956173	Chromosome 9	1956173	Chromosome 5	5759145	TRA	1.67927e-09	0.000198012	11.2802	SV
WSC	sv_484136_Chr09_4253282	Chromosome 9	4253282	Chromosome 3|Chromosome 4	13620011|65976423	TRA	5.3628e-08	0.00395224	-4.48898	SV	Sobic.009G044600	4259850	4261465	ACO1	1-aminocyclopropane-1-carboxylate oxidase
											Sobic.003G140200	13631564	13633468	-	peroxidase 5
2015_Days_to_harvest	sv_496056_Chr09_14387354	Chromosome 9	14387354	Chromosome 4	8229517	TRA	2.23357e-13	2.19477e-08	-15.5186	SV
2015_Days_to_harvest	sv_507422_Chr09_46182855	Chromosome 9	46182855	Chromosome 2	4279083|4279099	TRA	5.89183e-09	0.0059007	-34.7486	SNP+SV
Total_fresh_weight	sv_507705_Chr09_46325958	Chromosome 9	46325958	Chromosome 1	62132068	TRA	4.3232e-09	0.000367491	3.70975	SNP+SV	Sobic.009G118300	46337787	46343799	-	protein BONZAI 3
											Sobic.001G332900	62138561	62141402	-	putative receptor protein kinase ZmPK1
Total_fresh_weight	sv_509168_Chr09_47598503	Chromosome 9	47598503	Chromosome 9	47598716	DEL	2.22203e-09	0.00025277	0.911627	SNP+SV
2014_Days_to_harvest	snp_9_47873743	Chromosome 9	47873743	Chromosome 9	47873744	SNP	1.20839e-09	0.00214674	-12.8062	SNP
Anthesis_data	sv_510513_Chr09_48220477	Chromosome 9	48220477	Chromosome 9	48220765	DEL	1.0215e-10	4.36301e-05	5.57091	SV
Total_fresh_weight	sv_512206_Chr09_49420201	Chromosome 9	49420201	Chromosome 4	17143660	TRA	1.74388e-10	3.64584e-05	2.41911	SNP+SV	Sobic.009G137500	49435800	49437253	-	glutathione transferase GST 23
Total_fresh_weight	sv_512462_Chr09_49503697	Chromosome 9	49503697	Chromosome 3	2184028	TRA	3.51688e-11	1.08855e-05	4.33778	SNP+SV	Sobic.009G138100	49503582	49506047	-	putative disease resistance protein RGA3
											Sobic.003G026000	2201553	2202447	-	proline-rich receptor-like protein kinase PERK9
Total_fresh_weight	sv_512467_Chr09_49505086	Chromosome 9	49505086	Chromosome 9	49506065	DEL	2.06082e-09	0.000241221	4.54376	SNP+SV	Sobic.009G138100	49503582	49506047	-	putative disease resistance protein RGA3
2015_Dry_Weight	sv_514480_Chr09_50721310	Chromosome 9	50721310	Chromosome 1	55323904	TRA	5.24209e-11	1.54531e-05	0.0708991	SV	Sobic.009G151000	50739404	50742489	-	subtilisin-like protease SBT1.9
											Sobic.001G282100	55305939	55309886	-	protein NRT1/ PTR FAMILY 8.3
2015_Days_to_harvest	sv_515017_Chr09_50964761	Chromosome 9	50964761	Chromosome 1|Chromosome 5	72329376|1560128	TRA	4.14892e-08	0.00143889	-22.4674	SV	Sobic.009G153400	50971939	50975263	Dof|dof25	uncharacterized LOC8072499
											Sobic.001G446500	72333702	72340413	-	transcription factor bHLH18
Photoperiod_sensitivity	sv_515203_Chr09_51063738	Chromosome 9	51063738	Chromosome 6	55575028	TRA	1.29519e-10	6.94197e-06	0.644984	SV	Sobic.009G154200	51073114	51074699	-	transcription factor DIVARICATA
											Sobic.006G206000	55572908	55574447	-	WRKY transcription factor WRKY51
Stalk_height	sv_516251_Chr09_51705517	Chromosome 9	51705517	Chromosome 7	64874469	TRA	2.0865e-08	0.00246032	-84.062	SV	Sobic.009G159400	51705709	51708737	-	universal stress protein PHOS32
											Sobic.007G220300	64852083	64857788	-	elongator complex protein 2
2015_WSC	sv_521136_Chr09_54541053	Chromosome 9	54541053	Chromosome 9	54541152	DEL	2.55655e-09	0.00231011	5.44057	SNP+SV	Sobic.009G194200	54555817	54559436	-	probable xyloglucan glycosyltransferase 7
Anthesis_data	sv_521158_Chr09_54552767	Chromosome 9	54552767	Chromosome 9	54553249	DEL	1.48004e-10	4.36301e-05	4.94788	SV	Sobic.009G194200	54555817	54559436	-	probable xyloglucan glycosyltransferase 7
2015_Days_to_harvest	sv_521275_Chr09_54624527	Chromosome 9	54624527	Chromosome 1	75325991	TRA	1.42792e-10	6.47595e-06	-26.8252	SV	Sobic.009G195200	54632996	54637422	-	pollen-specific leucine-rich repeat extensin-like protein 3
											Sobic.001G481300	75306024	75306893	-	ethylene-responsive transcription factor 1
											Sobic.001G481400	75312217	75313912	-	ethylene-responsive transcription factor 1-like
											Sobic.001G481600	75317379	75324592	-	ethylene-responsive transcription factor RAP2-12
2015_Lignin	sv_521281_Chr09_54631046	Chromosome 9	54631046	Chromosome 4	20361932|20361929|20363777	TRA	5.02362e-14	2.96182e-08	-0.517113	SV	Sobic.009G195200	54632996	54637422	-	pollen-specific leucine-rich repeat extensin-like protein 3
2015_NDF	sv_521281_Chr09_54631046	Chromosome 9	54631046	Chromosome 4	20361932|20361929|20363777	TRA	1.24835e-21	7.35999e-16	-4.44846	SV	Sobic.004G132700	20361277	20366578	-	protein ACCELERATED CELL DEATH 6
2015_NFC	sv_521281_Chr09_54631046	Chromosome 9	54631046	Chromosome 4	20361932|20361929|20363777	TRA	2.8189e-11	8.30983e-06	3.73905	SV
2015_WSC	sv_521281_Chr09_54631046	Chromosome 9	54631046	Chromosome 4	20361932|20361929|20363777	TRA	4.50967e-16	2.65881e-10	4.51467	SV
NDF	sv_521281_Chr09_54631046	Chromosome 9	54631046	Chromosome 4	20361932|20361929|20363777	TRA	2.24905e-13	1.326e-07	-3.49053	SV
NFC	sv_521281_Chr09_54631046	Chromosome 9	54631046	Chromosome 4	20361932|20361929|20363777	TRA	2.98269e-13	1.75853e-07	3.8842	SV
WSC	sv_521281_Chr09_54631046	Chromosome 9	54631046	Chromosome 4	20361932|20361929|20363777	TRA	2.24432e-10	3.30801e-05	3.31101	SV
ADF	sv_521281_Chr09_54631046	Chromosome 9	54631046	Chromosome 4	20361932|20361929|20363777	TRA	3.66828e-09	0.00709391	-3.48968	SNP+SV
2015_WSC	sv_521865_Chr09_55030184	Chromosome 9	55030184	Chromosome 9	55030384	INV	7.4017e-08	0.00872777	9.59936	SV	Sobic.009G200200	55004317	55013213	-	alpha,alpha-trehalose-phosphate synthase [UDP-forming] 1
2015_WSC	sv_522364_Chr09_55409366	Chromosome 9	55409366	Chromosome 9	55409564	DEL	1.52527e-09	0.00168551	3.38797	SNP+SV	Sobic.009G206000	55406829	55408789	-	anthocyanidin 5,3-O-glucosyltransferase
Stalk_height	sv_525375_Chr09_57230238	Chromosome 9	57230238	Chromosome 9	57231556|57231513	INV|DEL	3.01749e-09	0.00389024	59.4705	SNP+SV	Sobic.009G232100	57212884	57215102	-	fasciclin-like arabinogalactan protein 13
											Sobic.009G232200	57216583	57218020	-	fasciclin-like arabinogalactan protein 12
Stalk_height	sv_525603_Chr09_57453016	Chromosome 9	57453016	Chromosome 9	57454943	DEL	1.82097e-10	0.000469532	73.1166	SNP+SV	Sobic.009G235100	57431364	57435521	-	GTPase Era
Sorghum_type	sv_525832_Chr09_57585319	Chromosome 9	57585319	Chromosome 9	57585485	DEL	7.81972e-10	0.000153678	0.299067	SV	Sobic.009G237600	57581046	57585953	-	common plant regulatory factor 1
2015_NDF	sv_525832_Chr09_57585319	Chromosome 9	57585319	Chromosome 9	57585485	DEL	6.46371e-09	0.00555549	-4.48891	SNP+SV	Sobic.009G238000	57602900	57611460	-	protein SUPPRESSOR OF PHYA-105 1
2015_NFC	sv_525832_Chr09_57585319	Chromosome 9	57585319	Chromosome 9	57585485	DEL	1.19807e-10	0.000185352	5.64344	SNP+SV
2015_WSC	sv_525832_Chr09_57585319	Chromosome 9	57585319	Chromosome 9	57585485	DEL	7.01989e-11	0.000134814	5.90678	SNP+SV
NDF	sv_525832_Chr09_57585319	Chromosome 9	57585319	Chromosome 9	57585485	DEL	5.96692e-09	0.00288478	-4.21831	SNP+SV
NFC	sv_525832_Chr09_57585319	Chromosome 9	57585319	Chromosome 9	57585485	DEL	3.76681e-10	0.00065415	5.22161	SNP+SV
WSC	sv_525832_Chr09_57585319	Chromosome 9	57585319	Chromosome 9	57585485	DEL	2.92135e-10	0.00110719	5.31417	SNP+SV
2015_WSC	sv_525936_Chr09_57661120	Chromosome 9	57661120	Chromosome 1	15346281	TRA	4.89665e-09	0.00344341	8.52606	SNP+SV	Sobic.001G181100	15364070	15368745	-	scarecrow-like protein 9
Dry_tons_per_acre	sv_525952_Chr09_57671603	Chromosome 9	57671603	Chromosome 6	60803973	TRA	6.29419e-08	0.00530132	7.60119	SV	Sobic.006G277100	60797371	60800752	-	WAT1-related protein At1g68170
Stalk_height	sv_526263_Chr09_57818430	Chromosome 9	57818430	Chromosome 9	57824224	DEL	2.6442e-11	0.00012089	81.1497	SNP+SV
Days_to_harvest	sv_526444_Chr09_57886852	Chromosome 9	57886852	Chromosome 2|Chromosome 9	58224271|57887675	TRA|DEL	7.37848e-09	0.000543774	-11.5439	SV	Sobic.009G242200	57877842	57883218	-	mitogen-activated protein kinase 17
Days_to_harvest	sv_526692_Chr09_58072587	Chromosome 9	58072587	Chromosome 9	58073506	DUP	5.60477e-09	0.0036638	-34.8621	SNP+SV
2014_Days_to_harvest	snp_9_59240109	Chromosome 9	59240109	Chromosome 9	59240110	SNP	4.85813e-09	0.00247171	-14.2432	SNP	Sobic.009G258500	59225242	59231539	-	notchless protein homolog
Days_to_harvest	snp_9_59240109	Chromosome 9	59240109	Chromosome 9	59240110	SNP	5.60318e-09	0.00574329	-13.7891	SNP
Stalk_height	snp_9_59240109	Chromosome 9	59240109	Chromosome 9	59240110	SNP	4.04824e-09	0.014464	-83.4933	SNP
Days_to_harvest	snp_9_59240589	Chromosome 9	59240589	Chromosome 9	59240590	SNP	5.82537e-09	0.00574329	-10.2748	SNP	Sobic.009G258500	59225242	59231539	-	notchless protein homolog
Stalk_height	snp_9_59240589	Chromosome 9	59240589	Chromosome 9	59240590	SNP	3.67094e-09	0.014464	-62.0692	SNP
Stalk_height	snp_6496539_Chr09_59240589	Chromosome 9	59240589	Chromosome 9	59240590	SNP	4.13673e-09	0.0039999	-61.9558	SNP+SV
2014_Days_to_harvest	sv_529156_Chr09_59249767	Chromosome 9	59249767	Chromosome 9	59252667	DEL	3.65914e-22	7.19118e-17	4.9041	SV	Sobic.009G258500	59225242	59231539	-	notchless protein homolog
2014_Dry_Weight	sv_529156_Chr09_59249767	Chromosome 9	59249767	Chromosome 9	59252667	DEL	2.15116e-10	3.1707e-05	0.0527154	SV
2015_Days_to_harvest	sv_529156_Chr09_59249767	Chromosome 9	59249767	Chromosome 9	59252667	DEL	9.49514e-10	3.99867e-05	3.35306	SV
Days_to_harvest	sv_529156_Chr09_59249767	Chromosome 9	59249767	Chromosome 9	59252667	DEL	2.00095e-10	1.9662e-05	3.8527	SV
Dry_tons_per_acre	sv_529156_Chr09_59249767	Chromosome 9	59249767	Chromosome 9	59252667	DEL	5.34321e-14	3.15024e-08	2.25955	SV
Dry_Weight	sv_529156_Chr09_59249767	Chromosome 9	59249767	Chromosome 9	59252667	DEL	1.08429e-11	1.59819e-06	0.0525922	SV
Total_fresh_weight	sv_529156_Chr09_59249767	Chromosome 9	59249767	Chromosome 9	59252667	DEL	1.53331e-15	9.04005e-10	0.415361	SV
Stalk_height	sv_529156_Chr09_59249767	Chromosome 9	59249767	Chromosome 9	59252667	DEL	3.12562e-11	0.00012089	48.7136	SNP+SV
2014_Dry_Weight	sv_533114_Chr10_1834925	Chromosome 10	1834925	Chromosome 10	1835152	DEL	4.93881e-12	9.70606e-07	0.0414674	SV	Sobic.010G022400	1840690	1844258	131L1.6	NAC domain-containing protein 43
											Sobic.010G022500	1853938	1856327	131L1.7	glucan endo-1,3-beta-glucosidase 14
2014_ADF	sv_535738_Chr10_3316938	Chromosome 10	3316938	Chromosome 10	3317188	DEL	5.10694e-13	3.01094e-07	-4.16431	SV
2014_NDF	sv_535738_Chr10_3316938	Chromosome 10	3316938	Chromosome 10	3317188	DEL	1.28697e-17	7.5877e-12	-6.24301	SV
2014_NFC	sv_535738_Chr10_3316938	Chromosome 10	3316938	Chromosome 10	3317188	DEL	1.93036e-19	1.1381e-13	7.64036	SV
2014_WSC	sv_535738_Chr10_3316938	Chromosome 10	3316938	Chromosome 10	3317188	DEL	9.84701e-15	5.80559e-09	6.94268	SV
Total_fresh_weight	sv_541164_Chr10_6441162	Chromosome 10	6441162	Chromosome 3	3434619	TRA	4.3232e-09	0.000367491	3.70975	SNP+SV
Photoperiod_sensitivity	sv_541308_Chr10_6501586	Chromosome 10	6501586	Chromosome 4	22428219	TRA	6.13884e-09	0.000212902	-0.485725	SV
2015_Days_to_harvest	sv_543322_Chr10_7524208	Chromosome 10	7524208	Chromosome 3	12262718	TRA	5.21743e-14	6.15217e-09	22.5716	SV
Total_fresh_weight	sv_549989_Chr10_11855251	Chromosome 10	11855251	Chromosome 7	2502932	TRA	5.16661e-09	0.000425169	2.06347	SNP+SV	Sobic.010G113300	11869847	11870984	-	senescence-specific cysteine protease SAG39
Total_fresh_weight	sv_550153_Chr10_12100693	Chromosome 10	12100693	Chromosome 10	12103954	DEL	9.86721e-11	2.18077e-05	2.02334	SNP+SV	Sobic.010G114300	12108778	12109962	-	protein trichome birefringence-like 19
Total_fresh_weight	sv_550626_Chr10_12673718	Chromosome 10	12673718	Chromosome 3	57700522	TRA	4.3232e-09	0.000367491	3.70975	SNP+SV	Sobic.003G237500	57692008	57692271	-	protein RESPONSE TO LOW SULFUR 3
											Sobic.003G237900	57719603	57725845	-	potassium channel AKT1
Total_fresh_weight	sv_550627_Chr10_12673729	Chromosome 10	12673729	Chromosome 3	57702095	TRA	4.64387e-11	1.08855e-05	3.77634	SNP+SV	Sobic.003G237500	57692008	57692271	-	protein RESPONSE TO LOW SULFUR 3
											Sobic.003G237900	57719603	57725845	-	potassium channel AKT1
Total_fresh_weight	sv_550646_Chr10_12691423	Chromosome 10	12691423	Chromosome 1	34031708	TRA	1.39964e-11	1.08855e-05	2.89973	SNP+SV
Total_fresh_weight	sv_550648_Chr10_12691635	Chromosome 10	12691635	Chromosome 1	34031377	TRA	4.64387e-11	1.08855e-05	3.77634	SNP+SV
2014_NFC	sv_550743_Chr10_12716669	Chromosome 10	12716669	Chromosome 5|Chromosome 3|Chromosome 10	67474805|57604889|12720347	TRA|TRA|INV	3.83301e-09	0.000376644	8.22876	SV	Sobic.005G190800	67471498	67479566	-	probable tocopherol O-methyltransferase, chloroplastic
2014_Dry_Weight	sv_550969_Chr10_12826759	Chromosome 10	12826759	Chromosome 3	52556921	TRA	4.70213e-09	0.00342166	0.227433	SNP+SV	Sobic.003G199101	52574271	52595240	-	indole-2-monooxygenase
Dry_Weight	sv_550969_Chr10_12826759	Chromosome 10	12826759	Chromosome 3	52556921	TRA	1.08969e-09	0.00168584	0.182358	SNP+SV
Total_fresh_weight	sv_552175_Chr10_13915659	Chromosome 10	13915659	Chromosome 10	13915907	DEL	4.64387e-11	1.08855e-05	1.88817	SNP+SV	Sobic.010G120700	13909156	13918528	-	disease resistance protein RPM1
Dry_tons_per_acre	sv_557924_Chr10_21849196	Chromosome 10	21849196	Chromosome 10	21849244	DEL	1.40124e-09	0.000759524	6.0472	SNP+SV
Dry_Weight	sv_557924_Chr10_21849196	Chromosome 10	21849196	Chromosome 10	21849244	DEL	7.54436e-10	0.00145897	0.144455	SNP+SV
Dry_Weight	sv_558650_Chr10_23676038	Chromosome 10	23676038	Chromosome 10	23676241	DUP	2.00001e-14	1.17916e-08	0.238753	SV	Sobic.009G244900	58064779	58069498	-	cycloartenol-C-24-methyltransferase 1
2014_Dry_Weight	sv_558650_Chr10_23676038	Chromosome 10	23676038	Chromosome 10	23676241	DUP	2.64128e-10	0.000408627	0.380014	SNP+SV
Dry_tons_per_acre	sv_558650_Chr10_23676038	Chromosome 10	23676038	Chromosome 10	23676241	DUP	8.59617e-10	0.000664948	11.5842	SNP+SV
Sorghum_type	sv_561984_Chr10_37522380	Chromosome 10	37522380	Chromosome 10	37536976	DEL	5.93036e-10	0.000153678	-0.222975	SV
Dry_tons_per_acre	sv_563991_Chr10_42433479	Chromosome 10	42433479	Chromosome 10	42433751	DEL	2.97185e-09	0.00124734	5.59594	SNP+SV
Photoperiod_sensitivity	sv_565460_Chr10_44785154	Chromosome 10	44785154	Chromosome 1	16811237	TRA	1.38131e-15	1.01799e-10	-0.627389	SV	Sobic.001G190300	16818364	16819389	-	glycine-rich protein 23
2015_NDF	sv_566305_Chr10_45990159	Chromosome 10	45990159	Chromosome 10	46464667	DUP	2.09903e-08	0.00247509	1.34882	SV
2015_NFC	sv_566305_Chr10_45990159	Chromosome 10	45990159	Chromosome 10	46464667	DUP	3.38452e-14	1.99544e-08	-2.36147	SV
2015_WSC	sv_566305_Chr10_45990159	Chromosome 10	45990159	Chromosome 10	46464667	DUP	7.40307e-15	2.18235e-09	-2.61302	SV
NFC	sv_566305_Chr10_45990159	Chromosome 10	45990159	Chromosome 10	46464667	DUP	8.76901e-12	2.58501e-06	-1.78193	SV
Total_fresh_weight	sv_570461_Chr10_49536707	Chromosome 10	49536707	Chromosome 3	17252421	TRA	2.06082e-09	0.000241221	4.54376	SNP+SV	Sobic.010G167500	49525037	49529166	-	receptor-like protein kinase 5
Total_fresh_weight	sv_571611_Chr10_50232515	Chromosome 10	50232515	Chromosome 5	16057877	TRA	4.04068e-09	0.000367491	2.9843	SNP+SV	Sobic.010G170900	50234992	50237132	-	protein bfr2
											Sobic.005G098300	16070441	16072798	-	putative auxin-responsive protein IAA29
											Sobic.005G098400	16077543	16084540	-	auxin-responsive protein IAA27
Total_fresh_weight	sv_572963_Chr10_51357169	Chromosome 10	51357169	Chromosome 7	3632837	TRA	9.71833e-10	0.000163424	3.07227	SNP+SV	Sobic.007G037600	3645034	3647426	-	S-type anion channel SLAH2
WSC	sv_573300_Chr10_51560552	Chromosome 10	51560552	Chromosome 1	3008933	TRA	6.99951e-08	0.0045853	9.1544	SV	Sobic.001G040200	2987435	2989263	NAC1|SNAC1	NAC domain-containing protein 67
2014_Lignin	sv_574345_Chr10_52204991	Chromosome 10	52204991	Chromosome 10	52208686	DEL	1.81307e-09	0.000534475	0.384005	SV
2015_ADF	sv_577993_Chr10_54211394	Chromosome 10	54211394	Chromosome 10	54222969	DEL	6.48458e-08	0.00637196	1.46355	SV	Sobic.010G198900	54204520	54206418	-	phytosulfokines 1
ADF	sv_577993_Chr10_54211394	Chromosome 10	54211394	Chromosome 10	54222969	DEL	1.52566e-10	4.49749e-05	1.38314	SV	Sobic.010G199000	54227450	54228046	-	transcription factor RF2b
Total_fresh_weight	sv_579515_Chr10_55138350	Chromosome 10	55138350	Chromosome 10	55149622	DEL	1.74388e-10	3.64584e-05	2.41911	SNP+SV	Sobic.010G208100	55121187	55130513	-	two-component response regulator ORR24
2015_Days_to_harvest	snp_10_55877619	Chromosome 10	55877619	Chromosome 10	55877620	SNP	6.75225e-09	0.0160835	-15.3881	SNP
2015_Days_to_harvest	snp_10_55877824	Chromosome 10	55877824	Chromosome 10	55877825	SNP	3.44378e-09	0.0160835	-15.6214	SNP
Total_fresh_weight	sv_585230_Chr10_58422871	Chromosome 10	58422871	Chromosome 10	58424915	DEL	1.87322e-09	0.000241221	1.48415	SNP+SV	Sobic.010G242900	58396493	58403156	-	putative disease resistance protein RGA3
											Sobic.010G243300	58421249	58424607	-	cytoplasmic 60S subunit biogenesis factor REI1 homolog 1
Total_fresh_weight	sv_585269_Chr10_58461647	Chromosome 10	58461647	Chromosome 10	58461703	DEL	1.87322e-09	0.000241221	1.48415	SNP+SV	Sobic.010G243900	58474320	58480965	-	adagio-like protein 1
Total_fresh_weight	sv_585274_Chr10_58462691	Chromosome 10	58462691	Chromosome 10	58468420	DEL	1.87322e-09	0.000241221	1.48415	SNP+SV	Sobic.010G243900	58474320	58480965	-	adagio-like protein 1
Total_fresh_weight	sv_585545_Chr10_58630357	Chromosome 10	58630357	Chromosome 7	6220514	TRA	1.10285e-08	0.00162554	1.67516	SV	Sobic.010G246500	58620021	58622697	-	xyloglucan endotransglucosylase/hydrolase protein 22
											Sobic.010G246600	58623190	58624755	-	xyloglucan endotransglucosylase/hydrolase protein 24
											Sobic.007G059600	6233483	6239958	-	LRR receptor kinase BAK1
											Sobic.005G190900	67480145	67482251	-	BTB/POZ and MATH domain-containing protein 2
