# Supplementary material for: Major impacts of widespread structural variation on sorghum
Source: HighWire-hosted journal article supplement (doi:10.1101/gr.278396.123), 2024-02-01
Supplement: Supplemental_Table_S12.xlsx [file Supplemental_Table_S12.xlsx]

## Sheet: Sheet1
Supplemental Table S12 Candidate genes underlying the correlated domestication of photoperiod sensitivity and sorghum type
locusTag	Chromosome	Detected Variations	Start	Stop	Synonyms	Description
Sobic.006G266600	Chromosome 1	sv_31470_Chr01_49690109	60010836	60014819	-	transcription factor SRM1
Sobic.003G022700	Chromosome 3	sv_128977_Chr03_1941778|sv_357072_Chr06_54964664	1958561	1961449	-	gibberellin 2-beta-dioxygenase 1
Sobic.003G292932	Chromosome 3	sv_177363_Chr03_62516873	62537633	62538423	-	casein kinase 1-like protein HD16
Sobic.004G075700	Chromosome 4	sv_200023_Chr04_6173360|sv_333502_Chr06_39796168	6149879	6170021	-	methyl-CpG-binding domain-containing protein 9
Sobic.004G157100	Chromosome 4	sv_221731_Chr04_49816546	49817844	49821068	-	bidirectional sugar transporter SWEET15
Sobic.007G047400	Chromosome 5	sv_266669_Chr05_10536324|sv_375458_Chr07_4737806	4745530	4757815	lhy	protein CCA1
Sobic.006G066700	Chromosome 6	sv_336942_Chr06_42706231	42702584	42706502	-	F-box/FBD/LRR-repeat protein At1g13570
Sobic.006G170300	Chromosome 6	sv_353459_Chr06_52720119|sv_155471_Chr03_31442014	52713305	52716037	NAB1	carotenoid cleavage dioxygenase 7, chloroplastic
Sobic.009G194200	Chromosome 9	sv_521136_Chr09_54541053|sv_521158_Chr09_54552767	54555817	54559436	-	probable xyloglucan glycosyltransferase 7
Sobic.009G195200	Chromosome 9	sv_521281_Chr09_54631046|sv_521275_Chr09_54624527	54632996	54637422	-	pollen-specific leucine-rich repeat extensin-like protein 3
Sobic.009G237600	Chromosome 9	sv_525832_Chr09_57585319	57581046	57585953	-	common plant regulatory factor 1
Sobic.009G238000	Chromosome 9	sv_525832_Chr09_57585319	57602900	57611460	-	protein SUPPRESSOR OF PHYA-105 1
Sobic.010G243900	Chromosome 10	sv_585274_Chr10_58462691|sv_585269_Chr10_58461647	58474320	58480965	-	adagio-like protein 1
