# Supplementary material for: Major impacts of widespread structural variation on sorghum
Source: HighWire-hosted journal article supplement (doi:10.1101/gr.278396.123), 2024-02-01
Supplement: Supplemental_Table_S13.xlsx [file Supplemental_Table_S13.xlsx]

## Sheet: Sheet1
Supplemental Table S13 DEGs as percentage of all genes in SV-associated gene and non-SV-associated gene categories in each annotation/effect fields
Annotation/Effects	SV association	Significance of gene expression difference	Ramada (PI 651493) vs BTx623 (PI 654163)																		RTx430 (PI 655996) vs BTx623 (PI 654163)															Tracy (PI 586541) vs BTx623 (PI 654163)
			Leaf									Stem									Leaf									Stem						Leaf									Stem
			Pre-flowering			Flowering			Milk			Pre-flowering			Flowering			Milk			Pre-flowering			Flowering			Milk			Pre-flowering			Milk			Pre-flowering			Flowering			Milk			Pre-flowering			Flowering
			Gene Number	Percentage of DEGs	p-value	Gene Number	Percentage of DEGs	p-value	Gene Number	Percentage of DEGs	p-value	Gene Number	Percentage of DEGs	p-value	Gene Number	Percentage of DEGs	p-value	Gene Number	Percentage of DEGs	p-value	Gene Number	Percentage of DEGs	p-value	Gene Number	Percentage of DEGs	p-value	Gene Number	Percentage of DEGs	p-value	Gene Number	Percentage of DEGs	p-value	Gene Number	Percentage of DEGs	p-value	Gene Number	Percentage of DEGs	p-value	Gene Number	Percentage of DEGs	p-value	Gene Number	Percentage of DEGs	p-value	Gene Number	Percentage of DEGs	p-value	Gene Number	Percentage of DEGs
Association	SV-associated	Significant	380	5.11647	2.6275e-33	461	6.15898	1.31204e-11	532	7.23219	7.53334e-20	141	1.91915	2.70261e-08	1114	15.2144	0.0291068	771	11.0206	1.04938e-08	495	5.92601	8.71755e-69	485	5.6606	2.11055e-50	416	5.24458	1.81617e-56	333	3.90158	8.40552e-29	586	7.41209	3.6307e-32	457	5.64128	2.00072e-61	403	4.97224	2.60576e-27	423	5.4023	1.23362e-53	226	2.82006	2.98846e-26	325	4.43262
		Non-significant	7047			7024			6824			7206			6208			6225			7858			8083			7516			8202			7320			7644			7702			7407			7788			7007
	Non-sv-associated	Significant	365	2.00329		702	3.80715		738	4.08118		150	0.828089		2342	12.9414		1401	8.07121		289	1.63591		354	1.94977		247	1.46614		268	1.47342		606	3.60822		279	1.60483		378	2.1652		270	1.60628		148	0.857077		334	2.10169
		Non-significant	17855			17737			17345			17964			15755			15957			17377			17802			16600			17921			16189			17106			17080			16539			17120			15558
impact_HIGH	SV-associated	Significant	136	13.9202	5.20738e-50	110	11.236	1.31097e-14	144	14.5749	2.36954e-27	67	6.92865	5.26753e-29	170	17.9894	1	148	16.5179	2.43285e-09	192	16.0535	4.62586e-82	157	12.4111	5.43926e-47	151	13.304	6.5173e-59	123	9.95951	4.01401e-41	168	15.1351	7.35405e-37	197	16.4854	1.70201e-90	155	13.1356	1.88884e-51	179	15.5247	4.58702e-79	123	10.5852	1.08913e-66	96	9.40255
		Non-significant	841			869			844			900			775			748			1004			1108			984			1112			942			998			1025			974			1039			925
	Non-sv-associated	Significant	609	2.46859		1053	4.22129		1126	4.60513		224	0.91451		3286	13.4265		2024	8.62819		592	2.38488		682	2.67882		512	2.16545		478	1.87532		1024	4.34064		539	2.21893		626	2.56736		514	2.18854		251	1.04063		563	2.53569
		Non-significant	24061			23892			23325			24270			21188			21434			24231			24777			23132			25011			22567			23752			23757			22972			23869			21640
impact_LOW	SV-associated	Significant	20	7.27273	1	26	9.38628	1	35	12.9151	0.00687997	10	3.7594	1	51	19.6154	1	42	16.4062	1	40	12.7796	3.63842e-10	34	10.4615	2.69166e-05	34	11.3712	3.42537e-08	12	3.84615	1	37	12.4161	0.00360915	26	8.28025	0.0441399	21	6.84039	1	17	5.55556	1	9	2.99003	1	22	7.94224
		Non-significant	255			251			236			256			209			214			273			291			265			300			261			288			286			289			292			255
	Non-sv-associated	Significant	725	2.85748		1137	4.43327		1235	4.90702		281	1.1153		3405	13.5339		2130	8.83891		744	2.89427		805	3.04936		629	2.56944		589	2.23005		1155	4.73302		710	2.82059		760	3.00919		676	2.77812		365	1.46111		637	2.77596
		Non-significant	24647			24510			23933			24914			21754			21968			24962			25594			23851			25823			23248			24462			24496			23657			24616			22310
impact_MODERATE	SV-associated	Significant	39	5.29172	1	46	6.21622	1	63	8.59482	0.52031	13	1.77596	1	91	12.5	1	78	11.3208	1	70	8.22562	8.19005e-10	69	7.59076	3.85919e-07	56	6.95652	2.03055e-06	42	4.8	0.105485	82	10.3929	1.27508e-06	86	7.31915	5.41576e-11	64	5.35565	0.26109	74	6.41248	8.49841e-07	34	2.85474	1	57	5.44413
		Non-significant	698			694			670			719			637			611			781			840			749			833			707			1089			1131			1080			1157			990
	Non-sv-associated	Significant	706	2.8342		1117	4.43536		1207	4.88545		278	1.12419		3365	13.6284		2094	8.84851		714	2.83694		770	2.98276		607	2.53191		559	2.16256		1110	4.64202		650	2.67369		717	2.94238		619	2.63572		340	1.41132		602	2.71452
		Non-significant	24204			24067			23499			24451			21326			21571			24454			25045			23367			25290			22802			23661			23651			22866			23751			21575
impact_MODIFIER	SV-associated	Significant	371	5.28716	2.3092e-35	449	6.34988	1.52102e-13	514	7.40421	3.38441e-21	140	2.02108	4.71407e-10	1064	15.4181	0.00433887	738	11.1954	1.49171e-09	485	6.02859	5.07024e-69	471	5.70494	5.85907e-49	406	5.30927	1.20146e-55	325	3.94897	1.16899e-28	572	7.50755	1.3627e-32	442	5.70028	2.35118e-59	393	5.06639	5.17848e-28	408	5.44654	2.39198e-51	225	2.93772	6.59501e-29	315	4.49422
		Non-significant	6646			6622			6428			6787			5837			5854			7560			7785			7241			7905			7047			7312			7364			7083			7434			6694
	Non-sv-associated	Significant	374	2.00751		714	3.7872		756	4.08715		151	0.814719		2392	12.9172		1434	8.07342		299	1.66351		368	1.99264		257	1.50012		276	1.49238		620	3.62955		294	1.65802		388	2.17904		285	1.662		149	0.845486		344	2.12149
		Non-significant	18256			18139			17741			18383			16126			16328			17675			18100			16875			18218			16462			17438			17418			16863			17474			15871
3_prime_UTR_truncation	SV-associated	Significant	4	11.1111	1	3	8.33333	1	2	5.12821	1	3	7.89474	1	6	17.6471	1	4	14.8148	1	8	15.6863	1	9	16.6667	1	7	14.2857	1	4	7.40741	1	7	13.4615	1	9	18	0.294234	5	10.8696	1	6	12.5	1	4	7.27273	1	4	9.09091
		Non-significant	32			33			37			35			28			23			43			45			42			50			45			41			41			42			51			40
	Non-sv-associated	Significant	741	2.89329		1160	4.48084		1268	4.99213		288	1.13283		3450	13.5907		2168	8.91191		776	2.98829		830	3.11211		656	2.65265		597	2.23847		1185	4.8075		727	2.85815		776	3.04111		687	2.79371		370	1.46668		655	2.82571
		Non-significant	24870			24728			24132			25135			21935			22159			25192			25840			24074			26073			23464			24709			24741			23904			24857			22525
3_prime_UTR_variant	SV-associated	Significant	28	6.82927	0.765947	31	7.36342	1	43	10.5911	0.0776309	10	2.51256	1	74	18.9744	1	43	11.2861	1	44	9.60699	3.97677e-07	44	9.42184	2.9474e-06	39	8.86364	1.81514e-06	21	4.53564	1	44	10.0686	0.0906554	29	6.56109	1	26	6.01852	1	25	5.80046	1	13	3.06604	1	26	6.70103
		Non-significant	382			390			363			388			316			338			414			423			401			442			393			413			406			406			411			362
	Non-sv-associated	Significant	717	2.84107		1132	4.43869		1227	4.90153		281	1.12117		3382	13.5123		2129	8.88082		740	2.89504		795	3.02776		624	2.56379		580	2.2086		1148	4.73129		707	2.82303		755	3.00426		668	2.75942		361	1.45225		633	2.77194
		Non-significant	24520			24371			23806			24782			21647			21844			24821			25462			23715			25681			23116			24337			24376			23540			24497			22203
5_prime_UTR_truncation	SV-associated	Significant	8	17.7778	1	7	16.2791	1	9	20.4545	1	4	10.5263	1	6	16.6667	1	8	20.5128	1	14	31.1111	8.28117e-07	13	27.0833	4.90062e-05	9	21.9512	0.0268729	6	12.766	1	11	26.8293	0.0646874	16	31.3725	1.42097e-08	14	29.7872	1.88679e-06	18	37.5	7.99526e-12	12	25.5319	7.64086e-08	10	27.7778
		Non-significant	37			36			35			34			30			31			31			35			32			41			30			35			33			30			35			26
	Non-sv-associated	Significant	737	2.87868		1156	4.4666		1261	4.96554		287	1.1289		3450	13.5918		2164	8.89986		770	2.9645		826	3.09642		654	2.64371		595	2.23039		1181	4.78913		720	2.83075		767	3.00596		675	2.74491		362	1.43452		649	2.79886
		Non-significant	24865			24725			24134			25136			21933			22151			25204			25850			24084			26082			23479			24715			24749			23916			24873			22539
5_prime_UTR_variant	SV-associated	Significant	25	10.3734	0.00111832	19	7.94979	1	30	12.1951	0.155464	7	2.95359	1	34	14.4068	1	28	12.7854	1	44	13.5802	1.73276e-12	39	11.5727	7.14056e-08	39	12.7036	1.85783e-11	25	7.71605	0.00281897	46	15.3333	9.00107e-08	34	11.6838	1.3615e-07	27	9.31034	0.00834894	33	11.7438	1.14509e-07	17	5.82192	0.0487418	26	9.84848
		Non-significant	216			220			216			230			202			191			280			298			268			299			254			257			263			248			275			238
	Non-sv-associated	Significant	720	2.83398		1144	4.45396		1240	4.922		284	1.12591		3422	13.5885		2144	8.88336		740	2.87994		800	3.0318		624	2.54985		576	2.18182		1146	4.69653		702	2.78627		754	2.98342		660	2.70958		357	1.42857		633	2.75697
		Non-significant	24686			24541			23953			24940			21761			21991			24955			25587			23848			25824			23255			24493			24519			23698			24633			22327
conservative_inframe_deletion	SV-associated	Significant	24	28.2353	3.91098e-13	19	23.1707	7.29746e-05	22	24.1758	1.26273e-05	13	14.2857	9.56896e-07	21	24.1379	1	22	27.5	0.0295089	27	25.9615	1.04602e-13	21	18.9189	9.17148e-07	17	18.0851	1.1575e-05	11	9.90991	1	22	25.2874	2.50995e-06	29	25.6637	2.60503e-15	18	16.5138	0.000139832	26	24.0741	5.83136e-13	14	13.2075	1.47281e-05	14	15.9091
		Non-significant	61			63			69			78			66			58			77			90			77			100			65			84			91			82			92			74
	Non-sv-associated	Significant	721	2.82059		1144	4.4269		1248	4.92347		278	1.09578		3435	13.5599		2150	8.85721		757	2.92109		818	3.07369		646	2.61697		590	2.21696		1170	4.75339		707	2.78643		763	2.99756		667	2.71901		360	1.42993		645	2.78786
		Non-significant	24841			24698			24100			25092			21897			22124			25158			25795			24039			26023			23444			24666			24691			23864			24816			22491
disruptive_inframe_deletion	SV-associated	Significant	1	7.14286	1	1	7.69231	1	2	15.3846	1	1	7.69231	1	2	15.3846	1	2	18.1818	1	2	11.1111	1	3	17.6471	1	2	14.2857	1	1	5.88235	1	4	26.6667	1	3	20	1	3	20	1	4	26.6667	1	0	0	1	0	0
		Non-significant	13			12			11			12			11			9			16			14			12			16			11			12			12			11			15			15
	Non-sv-associated	Significant	744	2.90251		1162	4.48458		1268	4.98702		290	1.13958		3454	13.5952		2170	8.91427		782	3.00758		836	3.13027		661	2.66909		600	2.2466		1188	4.81244		733	2.87778		778	3.04525		689	2.79808		374	1.48019		659	2.83942
		Non-significant	24889			24749			24158			25158			21952			22173			25219			25871			24104			26107			23498			24738			24770			23935			24893			22550
downstream_gene_variant	SV-associated	Significant	234	6.01852	1.87566e-25	275	6.98324	1.62214e-10	317	8.26382	6.98289e-17	95	2.48756	6.88577e-10	594	15.6192	1	422	11.6382	2.4412e-05	325	7.04836	7.26735e-52	305	6.39011	5.2348e-34	266	6.05785	1.2044e-38	218	4.62845	6.25009e-24	367	8.4426	6.79223e-26	299	6.50566	1.34546e-43	272	5.94016	3.36723e-26	281	6.33025	1.10137e-40	170	3.7803	3.88368e-31	202	4.92683
		Non-significant	3654			3663			3519			3724			3209			3204			4286			4468			4125			4492			3980			4297			4307			4158			4327			3898
	Non-sv-associated	Significant	511	2.34845		888	4.03893		953	4.41142		196	0.905646		2862	13.2402		1750	8.44269		459	2.14406		534	2.43269		397	1.94722		383	1.7398		825	4.05326		437	2.09191		509	2.42566		412	2.0396		204	0.981477		457	2.38967
		Non-significant	21248			21098			20650			21446			18754			18978			20949			21417			19991			21631			19529			20453			20475			19788			20581			18667
duplication	SV-associated	Significant	48	6.06827	0.0376308	52	6.61578	1	74	9.48718	0.00240175	19	2.45161	1	103	13.342	1	89	12.1253	1	76	8.3151	3.35038e-11	73	7.43381	2.55528e-07	62	7.20093	4.26195e-08	48	5.14469	0.00284538	84	9.90566	8.10303e-06	95	7.67987	6.6506e-14	70	5.53797	0.0307775	77	6.33745	5.74887e-07	36	2.8777	1	57	5.11211
		Non-significant	743			734			706			756			669			645			838			909			799			885			764			1142			1194			1138			1215			1058
	Non-sv-associated	Significant	697	2.80415		1111	4.4196		1196	4.85016		272	1.10184		3353	13.6041		2083	8.8188		708	2.82016		766	2.97568		601	2.51275		553	2.14416		1108	4.64512		641	2.64341		711	2.92605		616	2.62978		338	1.40652		602	2.72287
		Non-significant	24159			24027			23463			24414			21294			21537			24397			24976			23317			25238			22745			23608			23588			22808			23693			21507
exon_loss_variant	SV-associated	Significant	43	21.5	9.83988e-21	35	17.6768	8.55355e-08	43	20.3791	5.87757e-11	22	11.0553	3.55337e-11	35	18.4211	1	38	20.765	0.0164125	57	24.359	7.81455e-31	51	20.3187	2.37296e-22	44	19.8198	3.12067e-21	27	10.9312	3.98803e-07	44	19.5556	3.84787e-11	65	25.6917	2.10858e-38	53	21.8107	1.40471e-25	60	24.7934	6.71759e-35	36	14.8148	5.2943e-21	31	14.9038
		Non-significant	157			163			168			177			155			145			177			200			178			220			181			188			190			182			207			177
	Non-sv-associated	Significant	702	2.75867		1128	4.38467		1227	4.86364		269	1.06484		3421	13.5598		2134	8.82876		727	2.81947		788	2.97662		619	2.52067		574	2.16792		1148	4.69031		671	2.65922		728	2.8752		633	2.59458		338	1.34989		628	2.72854
		Non-significant	24745			24598			24001			24993			21808			22037			25058			25685			23938			25903			23328			24562			24592			23764			24701			22388
exon_region	SV-associated	Significant	0	0	1	0	0	1	0	0	1	0	0	1	2	66.6667	1	0	0	1	0	0	1	0	0	1	0	0	1	0	0	1	0	0	1	0	0	1	0	0	1	0	0	1	0	0	1	0	0
		Non-significant	3			3			3			3			1			3			3			3			2			3			2			3			3			3			3			2
	Non-sv-associated	Significant	745	2.90516		1163	4.48671		1270	4.99292		291	1.14306		3454	13.5899		2172	8.91955		784	3.01353		839	3.13985		663	2.67587		601	2.24917		1192	4.82611		736	2.8882		781	3.05556		693	2.81296		374	1.47949		659	2.83783
		Non-significant	24899			24758			24166			25167			21962			22179			25232			25882			24114			26120			23507			24747			24779			23943			24905			22563
frameshift_variant	SV-associated	Significant	26	16.9935	9.35871e-09	21	12.963	0.324911	20	12.4224	1	11	6.91824	0.0592808	22	14.3791	1	20	14.7059	1	42	20.2899	1.63732e-18	37	16.5919	2.78005e-12	35	17.6768	1.50441e-14	29	13.3641	3.90935e-10	38	19.6891	2.60932e-09	37	20	2.41789e-16	31	17.3184	1.14356e-10	38	21.5909	1.51999e-18	24	13.7143	4.02437e-12	19	12.8378
		Non-significant	127			141			141			148			131			116			165			186			163			188			155			148			148			138			151			129
	Non-sv-associated	Significant	719	2.82027		1142	4.43289		1250	4.94501		280	1.10663		3434	13.5914		2152	8.88595		742	2.87463		802	3.0263		628	2.55482		572	2.15792		1154	4.70867		699	2.76274		750	2.95462		655	2.67751		350	1.39403		640	2.77344
		Non-significant	24775			24620			24028			25022			21832			22066			25070			25699			23953			25935			23354			24602			24634			23808			24757			22436
intron_variant	SV-associated	Significant	37	5.42522	1	55	7.9023	0.97271	51	7.38061	1	14	2.04978	1	118	17.4041	1	76	11.6208	1	56	6.81265	0.000357589	55	6.60264	0.00550865	56	7.2445	4.28179e-07	38	4.6285	0.679597	63	8.24607	0.631907	66	8.53816	1.02337e-10	58	7.5817	6.00943e-06	54	7.20961	7.49084e-06	28	3.66013	0.296427	41	5.87393
		Non-significant	645			641			640			669			560			578			766			778			717			783			701			707			707			695			737			657
	Non-sv-associated	Significant	708	2.83597		1108	4.39195		1219	4.92565		277	1.11793		3338	13.4918		2096	8.84388		728	2.88923		784	3.02808		607	2.52853		563	2.17349		1129	4.71655		670	2.71112		723	2.91556		639	2.67476		346	1.41127		618	2.7435
		Non-significant	24257			24120			23529			24501			21403			21604			24469			25107			23399			25340			22808			24043			24075			23251			24171			21908
missense_variant	SV-associated	Significant	0	0	1	0	0	1	0	0	1	0	0	1	1	20	1	0	0	1	1	12.5	1	0	0	1	1	14.2857	1	0	0	1	3	37.5	1	0	0	1	0	0	1	0	0	1	0	0	1	0	0
		Non-significant	6			4			6			5			4			4			7			11			6			9			5			8			8			8			5			6
	Non-sv-associated	Significant	745	2.9055		1163	4.48688		1270	4.99351		291	1.14315		3455	13.5949		2172	8.91992		783	3.01026		839	3.14079		662	2.67237		601	2.24967		1189	4.81513		736	2.88877		781	3.05615		693	2.81353		374	1.47961		659	2.83832
		Non-significant	24896			24757			24163			25165			21959			22178			25228			25874			24110			26114			23504			24742			24774			23938			24903			22559
non_coding_transcript_variant	SV-associated	Significant	19	6.50685	1	24	8.10811	1	31	10.5802	1	4	1.37931	1	46	16.1972	1	38	13.7681	1	33	9.16667	0.000449377	27	7.23861	1	32	9.2219	3.54005e-05	13	3.59116	1	37	10.9467	0.078986	23	6.44258	1	22	6.34006	1	24	7.05882	0.961335	9	2.64706	1	23	7.27848
		Non-significant	273			272			262			286			238			238			327			346			315			349			301			334			325			316			331			293
	Non-sv-associated	Significant	726	2.86334		1139	4.44436		1239	4.92723		287	1.1402		3410	13.5667		2134	8.86286		751	2.92685		812	3.08148		631	2.58268		588	2.23048		1155	4.7408		713	2.83736		759	3.00999		669	2.7532		365	1.4634		636	2.77632
		Non-significant	24629			24489			23907			24884			21725			21944			24908			25539			23801			25774			23208			24416			24457			23630			24577			22272
splice_acceptor_variant	SV-associated	Significant	6	13.0435	1	5	10.4167	1	5	10.2041	1	4	8.69565	1	9	20	1	6	13.3333	1	8	13.3333	1	8	12.5	1	11	20.3704	0.003862	8	13.3333	1	10	18.5185	1	8	15.0943	1	7	12.963	1	7	13.2075	1	2	3.77358	1	4	8.88889
		Non-significant	40			43			44			42			36			39			52			56			43			52			44			45			47			46			51			41
	Non-sv-associated	Significant	739	2.88661		1158	4.47519		1265	4.98228		287	1.12925		3447	13.5848		2166	8.91028		776	2.98933		831	3.11703		652	2.63701		593	2.22397		1182	4.79572		728	2.86242		774	3.03422		686	2.79021		372	1.47449		655	2.82583
		Non-significant	24862			24718			24125			25128			21927			22143			25183			25829			24073			26071			23465			24705			24735			23900			24857			22524
splice_donor_variant	SV-associated	Significant	11	15.493	0.155176	6	8.10811	1	13	16.6667	1	5	7.57576	1	10	14.7059	1	13	19.697	1	15	21.4286	5.39585e-05	12	15.7895	0.111107	15	23.0769	3.28378e-06	10	14.2857	0.0968386	11	18.0328	1	17	20.9877	3.28416e-06	13	16.25	0.0223361	12	15.3846	0.0436867	9	11.1111	0.0795642	6	8.4507
		Non-significant	60			68			65			61			58			53			55			64			50			60			50			64			67			66			72			65
	Non-sv-associated	Significant	734	2.86988		1157	4.47582		1257	4.95643		286	1.12621		3446	13.5932		2159	8.88916		769	2.96351		827	3.10342		648	2.622		591	2.2173		1181	4.79302		719	2.83015		768	3.01377		681	2.77269		365	1.44836		653	2.82037
		Non-significant	24842			24693			24104			25109			21905			22129			25180			25821			24066			26063			23459			24686			24715			23880			24836			22500
splice_region_variant	SV-associated	Significant	30	8.28729	0.00802738	33	8.87097	1	42	11.2299	0.0222208	13	3.66197	1	58	16.5242	1	50	14.9701	1	51	12.7182	9.65988e-14	44	10.4513	9.54239e-08	49	12.6615	3.721e-15	24	5.85366	0.606809	48	12.6984	2.48325e-05	45	10.7399	1.03913e-09	35	8.62069	0.00108287	34	8.35381	0.000471591	21	5.14706	0.0228203	30	8.19672
		Non-significant	332			339			332			342			293			284			350			377			338			386			330			374			371			373			387			336
	Non-sv-associated	Significant	715	2.82776		1130	4.42235		1228	4.89926		278	1.10731		3398	13.5551		2122	8.8343		733	2.86127		795	3.02247		614	2.51722		577	2.19275		1144	4.70337		691	2.75661		746	2.96538		659	2.71954		353	1.41915		629	2.75177
		Non-significant	24570			24422			23837			24828			21670			21898			24885			25508			23778			25737			23179			24376			24411			23573			24521			22229
start_lost	SV-associated	Significant	31	25.2033	3.01482e-16	22	18.4874	0.000376658	26	20.6349	1.45106e-05	15	12	3.87068e-07	25	21.7391	1	23	20.1754	1	39	29.1045	3.1412e-23	26	17.2185	4.18143e-08	25	20	8.13692e-11	17	11.8056	0.00075756	28	22.7642	1.16212e-07	46	31.9444	7.40628e-31	34	23.6111	1.93482e-16	44	31.2057	2.14538e-29	29	20.8633	1.14091e-20	22	18.8034
		Non-significant	92			97			100			110			90			91			95			125			100			127			95			98			110			97			110			95
	Non-sv-associated	Significant	714	2.79737		1141	4.42162		1244	4.91447		276	1.08936		3431	13.5591		2149	8.86551		745	2.87811		813	3.0595		638	2.58782		584	2.19714		1164	4.73594		690	2.72275		747	2.93875		649	2.6492		345	1.37215		637	2.75674
		Non-significant	24810			24664			24069			25060			21873			22091			25140			25760			24016			25996			23414			24652			24672			23849			24798			22470
start_retained_variant	SV-associated	Significant
		Non-significant
	Non-sv-associated	Significant																			784	3.0133		839	3.13962		663	2.67576		601	2.249		1192	4.82591
		Non-significant																			25234			25884			24115			26122			23508
stop_gained	SV-associated	Significant	2	10.5263	1	1	6.25	1	0	0	1	1	6.66667	1	1	6.66667	1	0	0	1	3	12.5	1	3	12	1	2	9.52381	1	0	0	1	1	4.34783	1	4	18.1818	1	5	22.7273	1	5	25	1	1	4.54545	1	1	5.88235
		Non-significant	17			15			16			14			14			13			21			22			19			25			22			18			17			15			21			16
	Non-sv-associated	Significant	743	2.89917		1162	4.4851		1270	4.99548		290	1.13967		3455	13.6002		2172	8.92322		781	3.00442		836	3.1312		661	2.66984		601	2.25102		1191	4.82616		732	2.87465		776	3.03825		688	2.79459		373	1.47664		658	2.83535
		Non-significant	24885			24746			24153			25156			21949			22169			25214			25863			24097			26098			23487			24732			24765			23931			24887			22549
stop_lost	SV-associated	Significant	13	21.6667	0.000355862	11	18.0328	1	9	14.2857	1	7	12.7273	0.0765977	11	19.2982	1	10	22.7273	1	15	16.6667	0.00195819	16	17.5824	0.00059704	11	12.7907	0.454958	12	13.1868	0.0251102	16	19.5122	0.0397916	16	20.7792	1.34599e-05	12	17.3913	0.0277319	13	17.8082	0.00277593	6	8.4507	1	6	9.83607
		Non-significant	47			50			54			48			46			34			75			75			75			79			66			61			57			60			65			55
	Non-sv-associated	Significant	732	2.86083		1152	4.45424		1261	4.96926		284	1.11785		3445	13.5833		2162	8.89346		769	2.96579		823	3.09015		652	2.64042		589	2.21154		1176	4.7768		720	2.83364		769	3.0164		680	2.76805		368	1.45968		653	2.81915
		Non-significant	24855			24711			24115			25122			21917			22148			25160			25810			24041			26044			23443			24689			24725			23886			24843			22510
synonymous_variant	SV-associated	Significant	0	0	1	0	0	1	0	0	1	0	0	1	0	0	1	0	0	1	2	25	1	0	0	1	1	12.5	1	1	16.6667	1	3	42.8571	1	0	0	1	0	0	1	0	0	1	0	0	1	0	0
		Non-significant	4			4			4			5			5			5			6			7			7			5			4			7			7			5			6			2
	Non-sv-associated	Significant	745	2.90528		1163	4.48688		1270	4.99312		291	1.14315		3456	13.5988		2172	8.92028		782	3.00642		839	3.14032		662	2.67248		600	2.24568		1189	4.81493		736	2.88865		781	3.05603		693	2.81319		374	1.47966		659	2.83783
		Non-significant	24898			24757			24165			25165			21958			22177			25229			25878			24109			26118			23505			24743			24775			23941			24902			22563
transcript_ablation	SV-associated	Significant	83	12.2239	1.75083e-24	68	10.0443	1.31562e-05	94	13.9259	3.80361e-15	41	6.16541	3.4447e-14	121	18.6728	1	100	16.1551	9.0099e-05	128	14.7806	8.85911e-48	107	11.7196	4.78331e-28	99	12.0292	1.37164e-32	87	9.70982	1.13481e-26	115	14.3213	1.15125e-21	128	15.13	3.1948e-51	99	11.6608	1.67922e-26	116	14.1119	5.32993e-44	82	9.86763	2.33985e-39	62	8.44687
		Non-significant	596			609			581			624			527			519			738			806			724			809			688			718			750			706			749			672
	Non-sv-associated	Significant	662	2.65139		1095	4.33715		1176	4.74883		250	1.00823		3335	13.4633		2072	8.72972		656	2.60804		732	2.836		564	2.35432		514	1.99009		1077	4.50665		608	2.46753		682	2.75957		577	2.42264		292	1.19423		597	2.65451
		Non-significant	24306			24152			23588			24546			21436			21663			24497			25079			23392			25314			22821			24032			24032			23240			24159			21893
upstream_gene_variant	SV-associated	Significant	266	6.49097	2.75945e-36	293	7.17083	3.74704e-13	359	8.89936	2.47319e-26	102	2.53227	1.32955e-11	641	16.0813	0.0142477	472	12.3722	7.6407e-11	362	7.32794	4.55824e-65	337	6.64301	5.12675e-43	287	6.12855	4.09744e-44	227	4.48085	2.57838e-23	390	8.37989	1.70878e-27	346	7.13402	3.0948e-64	292	6.00452	7.11527e-30	316	6.74349	1.3515e-54	174	3.64169	4.39118e-30	219	5.03796
		Non-significant	3832			3793			3675			3926			3345			3343			4578			4736			4396			4839			4264			4504			4571			4370			4604			4128
	Non-sv-associated	Significant	479	2.22284		870	3.98388		911	4.25601		189	0.881818		2815	13.134		1700	8.27694		422	2.00199		502	2.3186		376	1.87102		374	1.72684		802	4.0006		390	1.8899		489	2.36232		377	1.88944		200	0.975419		440	2.33088
		Non-significant	21070			20968			20494			21244			18618			18839			20657			21149			19720			21284			19245			20246			20211			19576			20304			18437
[truncated: 1 more columns]
