# Supplementary material for: Major impacts of widespread structural variation on sorghum
Source: HighWire-hosted journal article supplement (doi:10.1101/gr.278396.123), 2024-02-01
Supplement: Supplemental_Table_S14.xlsx [file Supplemental_Table_S14.xlsx]

## Sheet: Sheet1
Supplemental Table S14 331 sorghum oil orthologs
Sorghum ortholog IDs	Gene IDs in NCBI	Description	Arabidopsis oil gene IDs	Entry	Gene names	Entry name
Sobic.001G003300	SORBI_3001G003300	ABC transporter G family member 3	At2g28070	Q9ZUU9	ABCG3 WBC3 At2g28070 F24D13.14	AB3G_ARATH
Sobic.001G005700	SORBI_3001G005700	acyl carrier protein 3, chloroplastic	At5g27200	O04652	ACP5 At5g27200 TM21B4.6	ACP5_ARATH
Sobic.001G008600	SORBI_3001G008600	non-specific phospholipase C4	At3g03540	Q9S816	NPC5 At3g03540 T12J13.18 T21P5.4	NPC5_ARATH
			At3g03520	Q9SRQ6	NPC3 At3g03520 T21P5.6	NPC3_ARATH
			At3g03530	Q9SRQ7	NPC4 At3g03530 T21P5.5	NPC4_ARATH
Sobic.001G023100	SORBI_3001G023100	acyl-CoA-binding domain-containing protein 4	At5g27630	Q8RWD9	ACBP5 At5g27630 F15A18.90	ACBP5_ARATH
			At3g05420	Q9MA55	ACBP4 At3g05420 F22F7.13	ACBP4_ARATH
Sobic.001G029200	SORBI_3001G029200	non-specific phospholipase C1	At1g07230	Q8L7Y9	NPC1 At1g07230 F10K1.6	NPC1_ARATH
Sobic.001G050300	SORBI_3001G050300	protein YLS3	At2g44290	O64864	YLS3 XYLP9 At2g44290	YLS3_ARATH
			At2g44300	O64865	AtXYP10 At2g44300 F4I1.11	O64865_ARATH
Sobic.001G059500	SORBI_3001G059500	non-specific lipid transfer protein GPI-anchored 2	At2g48130	Q7EB72	AtXYP7 At2g48130 F11L15.3	Q7EB72_ARATH
Sobic.001G066700	SORBI_3001G066700	accelerated cell death 11	At2g34690	O64587	ACD11 At2g34690 T29F13.10	ACD11_ARATH
Sobic.001G069700	SORBI_3001G069700	dihydroceramide fatty acyl 2-hydroxylase FAH1	At2g34770	O48916	FAH1 At2g34770 T29F13.2	FAH1_ARATH
Sobic.001G077400	SORBI_3001G077400	allene oxide synthase 1, chloroplastic	At5g42650	Q96242	CYP74A AOS At5g42650 MJB21.2	CP74A_ARATH
Sobic.001G086500	SORBI_3001G086500	MADS-box transcription factor 14	At1g69120	P35631	AP1 AGL7 At1g69120 F4N2.9	AP1_ARATH
Sobic.001G111700	SORBI_3001G111700	monoacylglycerol lipase	At1g18360	Q8VYJ0	At1g18360 F15H18.13 F15H18_13	Q8VYJ0_ARATH
			At1g73480	Q94AM5	At1g73480 T9L24.33 T9L24_33	Q94AM5_ARATH
Sobic.001G118300	SORBI_3001G118300	ACD11 homolog protein	At4g39670	Q8L7U7	At4g39670 T19P19.60	ACDH_ARATH
Sobic.001G120400	SORBI_3001G120400	phospholipase A2 homolog 3	At2g06925	Q8S8N6	PLA2-ALPHA At2g06925 T4E14.19	PLA2A_ARATH
Sobic.001G121900	SORBI_3001G121900	phosphatidylinositol 4-phosphate 5-kinase 1	At1g77740	Q8L796	PIP5K2 At1g77740 T32E8.7	PI5K2_ARATH
			At1g21980	Q56YP2	PIP5K1 P5K1 At1g21980 F2E2.1	PI5K1_ARATH
Sobic.001G125800	SORBI_3001G125800	probable linoleate 9S-lipoxygenase 4	At3g22400	Q9LUW0	LOX5 At3g22400 MCB17.13	LOX5_ARATH
			At1g55020	Q06327	LOX1 At1g55020 F14C21.3 F14C21.54 T24C10.13	LOX1_ARATH
Sobic.001G125900	SORBI_3001G125900	putative linoleate 9S-lipoxygenase 3	At3g22400	Q9LUW0	LOX5 At3g22400 MCB17.13	LOX5_ARATH
			At1g55020	Q06327	LOX1 At1g55020 F14C21.3 F14C21.54 T24C10.13	LOX1_ARATH
Sobic.001G128500	SORBI_3001G128500	non-specific lipid-transfer protein-like protein At2g13820	At4g14815	Q2PE59	AtXYP14 At4g14815	Q2PE59_ARATH
			At3g22600	Q9LJ86	LTPG5 AtXYP8 At3g22600	Q9LJ86_ARATH
Sobic.001G155500	SORBI_3001G155500	pyruvate dehydrogenase E1 component subunit beta-4, chloroplastic	At2g34590	O64688	E1-BETA-2 At2g34590 T31E10.7	ODPB3_ARATH
			At1g30120	Q9C6Z3	PDH-E1 BETA E1-BETA-1 At1g30120 T2H7.8	ODPB2_ARATH
Sobic.001G175600	SORBI_3001G175600	acyl carrier protein 3, mitochondrial	At5g47630	Q9FGJ4	MTACP2 At5g47630 MNJ7.22	ACPM3_ARATH
Sobic.001G200800	SORBI_3001G200800	non-specific lipid-transfer protein 2P	At1g66850	Q9C9N7	At1g66850 At1g66850/F4N21_4 C24_LOCUS5584 F4N21.4 F4N21_4	Q9C9N7_ARATH
			At5g38170	Q9FF39	MXA21.17 MXA21_17 At5g38170 C24_LOCUS23807	Q9FF39_ARATH
			At5g38160	Q9FF40	MXA21.18 MXA21_18 At5g38160 At5g38160/MXA21_50	Q9FF40_ARATH
Sobic.001G200900	SORBI_3001G200900	non-specific lipid-transfer protein 2P	At3g57311	Q9M2L7	F28O9.160 At3g57311	Q9M2L6_ARATH
Sobic.001G215000	SORBI_3001G215000	type III polyketide synthase A	At5g23190	Q9FMY1	CYP86B1 At5g23190 MKD15.5	C86B1_ARATH
Sobic.001G222700	SORBI_3001G222700	protein ECERIFERUM 1	At1g02205	F4HVY0	CER1 At1g02205 T7I23.10	CER1_ARATH
Sobic.001G230100	SORBI_3001G230100	3-ketoacyl-CoA thiolase 2, peroxisomal	At2g33150	Q56WD9	PED1 KAT2 At2g33150 F25I18.11	THIK2_ARATH
Sobic.001G270400	SORBI_3001G270400	caffeoylshikimate esterase	At5g16120	B3H7N1	At5g16120 T21H19.40 T21H19_40	B3H7N1_ARATH
Sobic.001G282900	SORBI_3001G282900	choline-phosphate cytidylyltransferase 2	At4g15130	F4JJE0	CCT2 At4g15130 dl3610w FCAALL.209	CCT2_ARATH
Sobic.001G286600	SORBI_3001G286600	probable plastid-lipid-associated protein 3, chloroplastic	At2g35490	O82291	PAP3 FBN2 FIB2 PGL40 At2g35490 T32F12.13	PAP3_ARATH
Sobic.001G290000	SORBI_3001G290000	3-hydroxyisobutyryl-CoA hydrolase 1	At2g30650	Q1PEY5	At2g30650 T11J7.4	HIBC2_ARATH
			At2g30660	Q6NMB0	At2g30660 T11J7.5	HIBC3_ARATH
			At5g65940	Q9LKJ1	CHY1 At5g65940 K14B20.11	HIBC1_ARATH
Sobic.001G295700	SORBI_3001G295700	phospholipase A1-Ibeta2, chloroplastic	At4g16820	O23522	At4g16820 dl4435w FCAALL.42	PLA14_ARATH
Sobic.001G302300	SORBI_3001G302300	QWRF motif-containing protein 7	At3g56960	Q9M1K2	PIP5K4 At3g56960 F24I3.40	PI5K4_ARATH
			At3g07960	Q9SFB8	PIP5K6 At3g07960 F17A17.30	PI5K6_ARATH
			At2g41210	Q9SLG9	PIP5K5 At2g41210 T3K9.2	PI5K5_ARATH
Sobic.001G320200	SORBI_3001G320200	phospholipase D gamma 1	At4g00240	O23078	PLDBETA2 At4g00240 A_IG005I10.13 F5I10.13	PLDB2_ARATH
			At2g42010	P93733	PLDBETA1 At2g42010 T6D20.10	PLDB1_ARATH
Sobic.001G329800	SORBI_3001G329800	allene oxide cyclase, chloroplastic	At3g25780	Q9LS01	AOC3 At3g25780 K13N2.12 K13N2_10	AOC3_ARATH
			At3g25770	Q9LS02	AOC2 At3g25770 K13N2.11 K13N2_9	AOC2_ARATH
			At3g25760	Q9LS03	AOC1 ERD12 At3g25760 K13N2.10 K13N2_8	AOC1_ARATH
			At1g13280	Q93ZC5	AOC4 At1g13280 T6J4.4 T6J4_23	AOC4_ARATH
Sobic.001G333900	SORBI_3001G333900	diacylglycerol kinase 1	At5g07920	Q39017	DGK1 At5g07920 F13G24.120 MXM12.16	DGK1_ARATH
Sobic.001G345100	SORBI_3001G345100	1-phosphatidylinositol-3-phosphate 5-kinase FAB1B	At3g14270	Q9LUM0	FAB1B At3g14270 MLN21.6	FAB1B_ARATH
Sobic.001G360900	SORBI_3001G360900	peptidyl-prolyl cis-trans isomerase PASTICCINO1	At3g54010	Q7DMA9	PAS1 DEI1 FKBP70 FKBP72 At3g54010 F5K20.310	PAS1_ARATH
Sobic.001G403400	SORBI_3001G403400	malonyl CoA-acyl carrier protein transacylase	At2g30200	Q8RU07	EMB3147 EMBRYO DEFECTIVE 3147 At2g30200 T27E13.6 T27E13_6	Q8RU07_ARATH
Sobic.001G409000	SORBI_3001G409000		At3g55940	Q9LY51	PLC7 PLC10 At3g55940 F27K19.120	PLCD7_ARATH
			At3g08510	Q39033	PLC2 At3g08510 T8G24.4	PLCD2_ARATH
Sobic.001G412100	SORBI_3001G412100	cardiolipin synthase (CMP-forming), mitochondrial	At2g39290	O80952	PGPS1 PGP1 PGS1 At2g39290 T16B24.7	PGPS1_ARATH
			At3g55030	Q9M2W3	PGPS2 PGP2 At3g55030 T15C9.30	PGPS2_ARATH
Sobic.001G413700	SORBI_3001G413700		At2g39350	O80946	ABCG1 WBC1 At2g39350 T16B24.1	AB1G_ARATH
			At5g13580	Q9FNB5	ABCG6 WBC6 At5g13580 MSH12.4	AB6G_ARATH
			At3g55090	Q9M2V7	ABCG16 WBC16 At3g55090 T15C9.80	AB16G_ARATH
Sobic.001G424600	SORBI_3001G424600	digalactosyldiacylglycerol synthase 2, chloroplastic	At4g00550	Q8W1S1	DGD2 At4g00550 F6N23.24	DGDG2_ARATH
Sobic.001G427900	SORBI_3001G427900	ASC1-like protein 3	At3g19260	Q9LJK3	LAG2 At3g19260 MVI11.18	LAG12_ARATH
Sobic.001G433900	SORBI_3001G433900	patatin-like protein 7	At2g39220	O80959	PLP6 At2g39220 T16B24.14	PLP6_ARATH
			At3g54950	Q9SV43	PLP7 At3g54950 F28P10.70	PLP7_ARATH
Sobic.001G434900	SORBI_3001G434900	long chain base biosynthesis protein 1a	At4g36480	Q94IB8	LCB1 EMB2779 FBR11 At4g36480 AP22 C7A10.880	LCB1_ARATH
Sobic.001G453200	SORBI_3001G453200	3-ketoacyl-CoA synthase 6	At1g25450	Q9C6L5	KCS5 CER60 At1g25450 F2J7.9	KCS5_ARATH
			At1g68530	Q9XF43	CUT1 CER6 EL6 KCS6 At1g68530 T26J14.10	KCS6_ARATH
Sobic.001G473200	SORBI_3001G473200	non-specific lipid-transfer protein-like protein At2g13820	At5g64080	Q8VYI9	At5g64080 MHJ24.6	NLTL5_ARATH
			At2g13820	Q9ZQI8	At2g13820 F17L24.13	NLTL2_ARATH
Sobic.001G481900	SORBI_3001G481900	phosphoinositide phosphatase SAC2	At3g14205	Q94A27	SAC2 At3g14205 MAG2.20	SAC2_ARATH
Sobic.001G482300	SORBI_3001G482300	3-ketoacyl-CoA synthase 10	At2g26250	Q570B4	FDH EL4 KCS10 At2g26250 T1D16.11	KCS10_ARATH
Sobic.001G483400	SORBI_3001G483400	probable lipoxygenase 6	At1g72520	Q9FNX8	LOX4 LOX3 At1g72520 F28P22.29 T10D10.1	LOX4_ARATH
			At1g17420	Q9LNR3	LOX3 At1g17420 F28G4.10	LOX3_ARATH
Sobic.001G499100	SORBI_3001G499100	ABC transporter G family member 22	At5g06530	Q93YS4	ABCG22 WBC23 At5g06530 F15M7.6	AB22G_ARATH
Sobic.001G510000	SORBI_3001G510000	noroxomaritidine synthase	At4g39490	F4JW26	CYP96A10 ''cytochrome P450 cytochrome P450 family 96 polypeptide 10 polypeptide 10'' subfamily A At4g39490 C24_LOCUS20707 F23K16.120 F23K16_120	F4JW26_ARATH
			At2g23180	O22189	CYP96A1 ''cytochrome P450 cytochrome P450 family 96 polypeptide 1 polypeptide 1'' subfamily A At2g23180 At2g23180/T20D16.19 T20D16.19 T20D16_19	O22189_ARATH
			At4g32170	O49373	''cytochrome P450 CYP96A2 cytochrome P450 F10N7.20 family 96 polypeptide 2 polypeptide 2'' subfamily A At4g32170 C24_LOCUS19923 F10M6.190	O49373_ARATH
			At1g65340	O80806	''cytochrome P450 CYP96A3 cytochrome P450 family 96 polypeptide 3 polypeptide 3'' subfamily A At1g65340 T8F5.12 T8F5_12	O80806_ARATH
			At5g52320	Q9FHC8	CYP96A4 ''cytochrome P450 cytochrome P450 family 96 polypeptide 4 polypeptide 4'' subfamily A At5g52320 C24_LOCUS25312 K24M7.5 K24M7_5	Q9FHC8_ARATH
			At1g57750	Q9FVS9	CYP96A15 MAH1 At1g57750 T8L23.21	C96AF_ARATH
			At5g02900	Q9LYZ5	''cytochrome P450 CYP96A13 cytochrome P450 family 96 polypeptide 13 polypeptide 13'' subfamily A At5g02900 F9G14.210 F9G14_210	Q9LYZ5_ARATH
			At2g21910	Q9SJ08	CYP96A5 ''cytochrome P450 cytochrome P450 family 96 polypeptide 5 polypeptide 5'' subfamily A At2g21910 F7D8.23 F7D8_23	Q9SJ08_ARATH
			At4g39510	Q9SVA7	CYP96A12 ''cytochrome P450 cytochrome P450 family 96 polypeptide 12 polypeptide 12'' subfamily A At4g39510 F23K16.140 F23K16_140	Q9SVA7_ARATH
			At4g39500	Q9SVA8	CYP96A11 ''cytochrome P450 cytochrome P450 family 96 polypeptide 11 polypeptide 11'' subfamily A At4g39500 F23K16.130 F23K16_130	Q9SVA8_ARATH
			At4g39480	Q9SVB0	CYP96A9 ''cytochrome P450 cytochrome P450 family 96 polypeptide 9 polypeptide 9'' subfamily A At4g39480 At4g39490 F23K16.110 F23K16_110	Q9SVB0_ARATH
			At1g47620	Q9SX95	''cytochrome P450 CYP96A8 cytochrome P450 family 96 polypeptide 8 polypeptide 8'' subfamily A At1g47620 F16N3.8 F16N3_8	Q9SX95_ARATH
Sobic.001G510300	SORBI_3001G510300	alkane hydroxylase MAH1	At4g39490	F4JW26	CYP96A10 ''cytochrome P450 cytochrome P450 family 96 polypeptide 10 polypeptide 10'' subfamily A At4g39490 C24_LOCUS20707 F23K16.120 F23K16_120	F4JW26_ARATH
			At2g23180	O22189	CYP96A1 ''cytochrome P450 cytochrome P450 family 96 polypeptide 1 polypeptide 1'' subfamily A At2g23180 At2g23180/T20D16.19 T20D16.19 T20D16_19	O22189_ARATH
			At4g32170	O49373	''cytochrome P450 CYP96A2 cytochrome P450 F10N7.20 family 96 polypeptide 2 polypeptide 2'' subfamily A At4g32170 C24_LOCUS19923 F10M6.190	O49373_ARATH
			At1g65340	O80806	''cytochrome P450 CYP96A3 cytochrome P450 family 96 polypeptide 3 polypeptide 3'' subfamily A At1g65340 T8F5.12 T8F5_12	O80806_ARATH
			At5g52320	Q9FHC8	CYP96A4 ''cytochrome P450 cytochrome P450 family 96 polypeptide 4 polypeptide 4'' subfamily A At5g52320 C24_LOCUS25312 K24M7.5 K24M7_5	Q9FHC8_ARATH
			At1g57750	Q9FVS9	CYP96A15 MAH1 At1g57750 T8L23.21	C96AF_ARATH
			At5g02900	Q9LYZ5	''cytochrome P450 CYP96A13 cytochrome P450 family 96 polypeptide 13 polypeptide 13'' subfamily A At5g02900 F9G14.210 F9G14_210	Q9LYZ5_ARATH
			At2g21910	Q9SJ08	CYP96A5 ''cytochrome P450 cytochrome P450 family 96 polypeptide 5 polypeptide 5'' subfamily A At2g21910 F7D8.23 F7D8_23	Q9SJ08_ARATH
			At4g39510	Q9SVA7	CYP96A12 ''cytochrome P450 cytochrome P450 family 96 polypeptide 12 polypeptide 12'' subfamily A At4g39510 F23K16.140 F23K16_140	Q9SVA7_ARATH
			At4g39500	Q9SVA8	CYP96A11 ''cytochrome P450 cytochrome P450 family 96 polypeptide 11 polypeptide 11'' subfamily A At4g39500 F23K16.130 F23K16_130	Q9SVA8_ARATH
			At4g39480	Q9SVB0	CYP96A9 ''cytochrome P450 cytochrome P450 family 96 polypeptide 9 polypeptide 9'' subfamily A At4g39480 At4g39490 F23K16.110 F23K16_110	Q9SVB0_ARATH
			At1g47620	Q9SX95	''cytochrome P450 CYP96A8 cytochrome P450 family 96 polypeptide 8 polypeptide 8'' subfamily A At1g47620 F16N3.8 F16N3_8	Q9SX95_ARATH
Sobic.001G510400	SORBI_3001G510400	noroxomaritidine synthase	At4g39490	F4JW26	CYP96A10 ''cytochrome P450 cytochrome P450 family 96 polypeptide 10 polypeptide 10'' subfamily A At4g39490 C24_LOCUS20707 F23K16.120 F23K16_120	F4JW26_ARATH
			At2g23180	O22189	CYP96A1 ''cytochrome P450 cytochrome P450 family 96 polypeptide 1 polypeptide 1'' subfamily A At2g23180 At2g23180/T20D16.19 T20D16.19 T20D16_19	O22189_ARATH
			At4g32170	O49373	''cytochrome P450 CYP96A2 cytochrome P450 F10N7.20 family 96 polypeptide 2 polypeptide 2'' subfamily A At4g32170 C24_LOCUS19923 F10M6.190	O49373_ARATH
			At1g65340	O80806	''cytochrome P450 CYP96A3 cytochrome P450 family 96 polypeptide 3 polypeptide 3'' subfamily A At1g65340 T8F5.12 T8F5_12	O80806_ARATH
			At5g52320	Q9FHC8	CYP96A4 ''cytochrome P450 cytochrome P450 family 96 polypeptide 4 polypeptide 4'' subfamily A At5g52320 C24_LOCUS25312 K24M7.5 K24M7_5	Q9FHC8_ARATH
			At1g57750	Q9FVS9	CYP96A15 MAH1 At1g57750 T8L23.21	C96AF_ARATH
			At5g02900	Q9LYZ5	''cytochrome P450 CYP96A13 cytochrome P450 family 96 polypeptide 13 polypeptide 13'' subfamily A At5g02900 F9G14.210 F9G14_210	Q9LYZ5_ARATH
			At2g21910	Q9SJ08	CYP96A5 ''cytochrome P450 cytochrome P450 family 96 polypeptide 5 polypeptide 5'' subfamily A At2g21910 F7D8.23 F7D8_23	Q9SJ08_ARATH
			At4g39510	Q9SVA7	CYP96A12 ''cytochrome P450 cytochrome P450 family 96 polypeptide 12 polypeptide 12'' subfamily A At4g39510 F23K16.140 F23K16_140	Q9SVA7_ARATH
			At4g39500	Q9SVA8	CYP96A11 ''cytochrome P450 cytochrome P450 family 96 polypeptide 11 polypeptide 11'' subfamily A At4g39500 F23K16.130 F23K16_130	Q9SVA8_ARATH
			At4g39480	Q9SVB0	CYP96A9 ''cytochrome P450 cytochrome P450 family 96 polypeptide 9 polypeptide 9'' subfamily A At4g39480 At4g39490 F23K16.110 F23K16_110	Q9SVB0_ARATH
			At1g47620	Q9SX95	''cytochrome P450 CYP96A8 cytochrome P450 family 96 polypeptide 8 polypeptide 8'' subfamily A At1g47620 F16N3.8 F16N3_8	Q9SX95_ARATH
Sobic.001G524300	SORBI_3001G524300	sphingoid long-chain bases kinase 2, mitochondrial	At2g46090	O82359	LCKB2 At2g46090 T3F17.26	LCKB2_ARATH
Sobic.001G527200	SORBI_3001G527200	probable long-chain-alcohol O-fatty-acyltransferase 4	At1g34500	Q4PT07	At1g34500 F12K21.19	WAXS9_ARATH
			At5g51420	Q9FGN1	At5g51420 MFG13.13	WAXSB_ARATH
			At5g55380	Q9FJ72	AT1 At5g55380 MTE17.9	WAXS1_ARATH
			At5g55370	Q9FJ73	AT2 At5g55370 MTE17.8	WAXS2_ARATH
			At5g55360	Q9FJ74	AT3 At5g55360 MTE17.7	WAXS3_ARATH
			At5g55350	Q9FJ75	AT4 At5g55350 MTE17.6	WAXS4_ARATH
			At5g55340	Q9FJ76	AT5 At5g55340 MTE17.5	WAXS5_ARATH
			At5g55330	Q9FJ77	AT6 At5g55330 MTE17.4	WAXS6_ARATH
			At5g55320	Q9FJ78	AT7 At5g55320 MTE17.3	WAXS7_ARATH
			At1g34520	Q9LNL1	At1g34520 F12K21.17	WAXS8_ARATH
Sobic.001G543700	SORBI_3001G543700	palmitoyl-protein thioesterase 1	At3g60340	Q9LY31	F27H5_130 At3g60340 C24_LOCUS16296 T8B10.2	Q9LY31_ARATH
Sobic.002G000600	SORBI_3002G000600	sulfoquinovosyl transferase SQD2	At5g01220	Q8S4F6	SQD2 At5g01220 F7J8.200	SQD2_ARATH
Sobic.002G010100	SORBI_3002G010100	MADS-box transcription factor 15	At1g69120	P35631	AP1 AGL7 At1g69120 F4N2.9	AP1_ARATH
Sobic.002G050400	SORBI_3002G050400	non-specific lipid-transfer protein 4.3	At4g14815	Q2PE59	AtXYP14 At4g14815	Q2PE59_ARATH
			At3g22600	Q9LJ86	LTPG5 AtXYP8 At3g22600	Q9LJ86_ARATH
Sobic.002G070200	SORBI_3002G070200	protein YLS3	At2g44290	O64864	YLS3 XYLP9 At2g44290	YLS3_ARATH
			At2g44300	O64865	AtXYP10 At2g44300 F4I1.11	O64865_ARATH
Sobic.002G078300	SORBI_3002G078300	acyl carrier protein 1, mitochondrial	At2g44620	P53665	MTACP1 At2g44620 F16B22.11	ACPM1_ARATH
Sobic.002G081500	SORBI_3002G081500	glycerol-3-phosphate dehydrogenase [NAD(+)], chloroplastic	At2g40690	Q949Q0	GLY1 SFD1 At2g40690	GPDA2_ARATH
Sobic.002G109100	SORBI_3002G109100	putative lipid-transfer protein DIR1	At5g48485	Q8W453	DIR1 At5g48485 MJE7	DIRL1_ARATH
			At5g48490	Q9LV65	MJE7.13 MJE7_13 At5g48490 C24_LOCUS24917	Q9LV65_ARATH
Sobic.002G122700	SORBI_3002G122700	uncharacterized LOC8057953	At1g06515	A8MSB8	At1g06515	A8MSB8_ARATH
			At2g30942	F4IPU5	At2g30942	F4IPU5_ARATH
Sobic.002G131300	SORBI_3002G131300	probable UDP-3-O-acylglucosamine N-acyltransferase 2, mitochondrial	At4g05210	F4JGP6	LPXD1 At4g05210 C17L7.130	LPXD1_ARATH
			At4g21220	F4JIP6	LPXD2 At4g21220 F7J7.160	LPXD2_ARATH
Sobic.002G131500	SORBI_3002G131500	protein TRIGALACTOSYLDIACYLGLYCEROL 3, chloroplastic	At1g65410	Q9AT00	TGD3 ABCI13 NAP11 At1g65410 T8F5.19	TGD3_ARATH
Sobic.002G134100	SORBI_3002G134100	fatty acyl-CoA reductase 1	At3g44550	Q0WRB0	FAR5 At3g44550 F14L2.100	FACR5_ARATH
			At3g44560	Q1PEI6	FAR8 At3g44560 F14L2.110	FACR8_ARATH
			At3g44540	Q9LXN3	FAR4 At3g44540 F14L2.90	FACR4_ARATH
			At4g33790	Q93ZB9	FAR3 CER4 At4g33790 T16L1.280	FACR3_ARATH
Sobic.002G167100	SORBI_3002G167100	phosphatidate cytidylyltransferase 1	At4g26770	Q1PE48	CDS3 At4g26770 F10M23.110	CDS3_ARATH
Sobic.002G175400	SORBI_3002G175400	delta(8)-fatty-acid desaturase 2	At2g46210	Q3EBF7	SLD2 At2g46210 T3F17.14	SLD2_ARATH
			At3g61580	Q9ZRP7	SLD1 At3g61580 F2A19.180	SLD1_ARATH
Sobic.002G181800	SORBI_3002G181800	protein HOTHEAD	At1g72970	Q9S746	HTH ACE At1g72970 F3N23.17	HTH_ARATH
Sobic.002G201300	SORBI_3002G201300		At3g28910	Q9SCU7	MYB30 hsr1 At3g28910 MLD15.8	MYB30_ARATH
Sobic.002G206200	SORBI_3002G206200	probable monogalactosyldiacylglycerol synthase 1, chloroplastic	At4g31780	O81770	MGD1 MGDA At4g31780 F28M20.30	MGDG1_ARATH
Sobic.002G214400	SORBI_3002G214400	probable ethanolamine kinase	At2g26830	O81024	EMB1187 At2g26830 F12C20.13	EKI_ARATH
Sobic.002G215700	SORBI_3002G215700	aldehyde dehydrogenase family 7 member A1	At1g54100	Q9SYG7	ALDH7B4 At1g54100 F15I1.19	AL7B4_ARATH
Sobic.002G218500	SORBI_3002G218500	phospholipid:diacylglycerol acyltransferase 1	At5g13640	Q9FNA9	PDAT1 PDAT At5g13640 MSH12.10 T6I14.2	PDAT1_ARATH
Sobic.002G235900	SORBI_3002G235900	phosphatidylinositol 4-kinase gamma 5	At1g13640	Q8W4R8	PI4KG6 PI4KGAMMA6 At1g13640 F21F23.8	P4KG6_ARATH
			At1g26270	Q9C671	PI4KG5 PI4KGAMMA5 At1g26270 F28B23.7	P4KG5_ARATH
			At2g03890	Q9SI52	PI4KG7 PI4KGAMMA7 UBDKGAMMA7 At2g03890 T18C20.9	P4KG7_ARATH
Sobic.002G256900	SORBI_3002G256900	oleoyl-acyl carrier protein thioesterase 1, chloroplastic	At4g13050	Q9SV64	FATA2 At4g13050 F25G13.140	FATA2_ARATH
Sobic.002G261300	SORBI_3002G261300	uncharacterized LOC8058987	At3g26840	Q9LW26	At3g26840 MDJ14.16	Y3684_ARATH
Sobic.002G265300	SORBI_3002G265300	acyl-coenzyme A thioesterase 9, mitochondrial	At5g48370	Q9LK77	At5g48370 K23F3.9 K23F3_9	Q9LK77_ARATH
Sobic.002G267500	SORBI_3002G267500	probable 1-acylglycerol-3-phosphate O-acyltransferase	At4g24160	O22975	At4g24160 T19F6.4	LPAAT_ARATH
Sobic.002G270900	SORBI_3002G270900	homeobox-leucine zipper protein ROC6	At3g61150	Q9M2E8	HDG1 HDGL2-1 At3g61150 T20K12.50	HDG1_ARATH
Sobic.002G271900	SORBI_3002G271900	vacuolar protein sorting-associated protein 22 homolog 1-like	At5g62080	Q8GT78	MTG10.3 MTG10_3 At5g62080 At5g62080/mtg10_100	Q8GT78_ARATH
			At5g52160	Q9LTK4	At5g52160 C24_LOCUS25296 F17P19.6 F17P19_6	Q9LTK4_ARATH
Sobic.002G277900	SORBI_3002G277900	uncharacterized LOC8070905	At4g38690	Q9SZP6	F20M13.250 At4g38690 C24_LOCUS20627 T9A14.2	Q9SZP6_ARATH
Sobic.002G280400	SORBI_3002G280400	acyl carrier protein 2, chloroplastic	At5g27200	O04652	ACP5 At5g27200 TM21B4.6	ACP5_ARATH
			At3g05020	P11829	ACP1 At3g05020 T9J14.3	ACP1_ARATH
			At1g54580	P25701	ACP2 A1 ACL1.2 At1g54580 T22H22.3	ACP2_ARATH
			At1g54630	P25702	ACP3 A2 ACL1.3 At1g54630 T22H22.7	ACP3_ARATH
Sobic.002G283600	SORBI_3002G283600	protein SCAI homolog	At1g76150	Q8VYI3	ECH2 At1g76150 T23E18.38 T23E18.9	ECH2_ARATH
Sobic.002G302900	SORBI_3002G302900	uncharacterized LOC8080682	At3g49050	Q9SMU2	T2J13.110 At3g49050	Q9SMU2_ARATH
Sobic.002G339500	SORBI_3002G339500	sphingosine kinase 1	At4g21540	Q8L7L1	SPHK1 At4g21540 F18E5.160	SPHK1_ARATH
Sobic.002G341600	SORBI_3002G341600	caffeoylshikimate esterase	At1g11090	O04083	At1g11090 At1g11090/T19D16_3 C24_LOCUS1113 T19D16.3 T19D16_3	O04083_ARATH
Sobic.002G374600	SORBI_3002G374600	3-oxoacyl-[acyl-carrier-protein] synthase II, chloroplastic	At1g74960	Q9C9P4	KAS2 FAB1 At1g74960 F25A4.7 F9E10.19	KASC2_ARATH
Sobic.002G378000	SORBI_3002G378000	amidase 1	At1g08980	Q9FR37	AMI1 TOC64-I At1g08980 F7G19.15	AMI1_ARATH
Sobic.002G403100	SORBI_3002G403100	phosphatidylinositol 4-phosphate 5-kinase 6	At3g56960	Q9M1K2	PIP5K4 At3g56960 F24I3.40	PI5K4_ARATH
			At3g07960	Q9SFB8	PIP5K6 At3g07960 F17A17.30	PI5K6_ARATH
			At2g41210	Q9SLG9	PIP5K5 At2g41210 T3K9.2	PI5K5_ARATH
Sobic.002G418200	SORBI_3002G418200	B3 domain-containing protein Os07g0679700	At4g32010	Q5CCK4	VAL2 HSL1 At4g32010 F10N7.180	VAL2_ARATH
Sobic.002G430100	SORBI_3002G430100	temperature-sensitive sn-2 acyl-lipid omega-3 desaturase (ferredoxin), chloroplastic	At3g11170	P46310	FAD7 FADD At3g11170 F11B9.10 F9F8.4	FAD3C_ARATH
			At5g05580	P48622	FAD8 At5g05580 MOP10.12	FAD3D_ARATH
Sobic.002G430500	SORBI_3002G430500	phosphoinositide phospholipase C 2	At3g55940	Q9LY51	PLC7 PLC10 At3g55940 F27K19.120	PLCD7_ARATH
			At3g08510	Q39033	PLC2 At3g08510 T8G24.4	PLCD2_ARATH
Sobic.003G028900	SORBI_3003G028900	monoacylglycerol lipase	At5g11650	Q9LYG5	At5g11650 T22P22.40 T22P22_40	Q9LYG5_ARATH
Sobic.003G038000	SORBI_3003G038000	phospholipase A1-Igamma1, chloroplastic	At2g30550	Q3EBR6	At2g30550 T6B20.10	PLA16_ARATH
			At1g51440	Q9C8J6	At1g51440 F5D21.19	PLA17_ARATH
			At1g06800	Q941F1	At1g06800 F4H5.11 F4H5_10	PLA15_ARATH
Sobic.003G045700	SORBI_3003G045700	ABC transporter G family member 31	At2g26910	O81016	ABCG32 PDR4 PEC1 At2g26910 F12C20.5	AB32G_ARATH
Sobic.003G064800	SORBI_3003G064800	dirigent protein 10	At2g28670	Q9SIA8	DIR10 ESB1 At2g28670 T8O18.4	DIR10_ARATH
Sobic.003G092800	SORBI_3003G092800	ABC transporter G family member 7	At2g01320	Q9ZU35	ABCG7 WBC7 At2g01320 F10A8.20	AB7G_ARATH
Sobic.003G095800	SORBI_3003G095800	CDP-diacylglycerol--serine O-phosphatidyltransferase 1	At1g15110	F4HXY6	PSS1 AtPSS1 phosphatidylserine synthase 1 At1g15110 C24_LOCUS1557 F9L1.4 F9L1_4	F4HXY6_ARATH
Sobic.003G109100	SORBI_3003G109100	sphingosine-1-phosphate lyase	At1g27980	Q9C509	DPL1 At1g27980 F13K9.8	SGPL_ARATH
Sobic.003G109200	SORBI_3003G109200	gametogenetin	At3g48610	Q8H965	NPC6 At3g48610	NPC6_ARATH
Sobic.003G127200	SORBI_3003G127200	phosphatidylinositol 4-kinase gamma 1	At2g40850	O22199	PI4KG1 PI4KGAMMA1 At2g40850 T20B5.5	P4KG1_ARATH
			At3g56600	Q0WMZ6	PI4KG8 PI4KGAMMA8 At3g56600 T5P19_250	P4KG8_ARATH
Sobic.003G131200	SORBI_3003G131200	phospholipid-transporting ATPase 1	At5g04930	P98204	ALA1 At5g04930 MUG13.22	ALA1_ARATH
Sobic.003G145900	SORBI_3003G145900	lysophospholipid acyltransferase LPEAT1	At1g80950	Q8L7R3	LPEAT1 At1g80950 F23A5.31	LPCT1_ARATH
Sobic.003G146900	SORBI_3003G146900	uncharacterized LOC8079620	At4g16070	F4JL01	At4g16070 C24_LOCUS18173 Dl4075c FCAALL.271	F4JL01_ARATH
Sobic.003G149400	SORBI_3003G149400	caffeoylshikimate esterase	At3g62860	F4IZK0	At3g62860	F4IZK0_ARATH
			At2g47630	O22248	At2g47630 C24_LOCUS11130 F17A22.2	O22248_ARATH
Sobic.003G150200	SORBI_3003G150200	caffeoylshikimate esterase	At5g19290	Q8VZV6	At5g19290 C24_LOCUS22606 F7K24.40 F7K24_40	Q8VZV6_ARATH
			At5g14980	Q9LFQ7	At5g14980 C24_LOCUS22155 F2G14.100 F2G14_100	Q9LFQ7_ARATH
Sobic.003G153700	SORBI_3003G153700	Golgi apparatus membrane protein-like protein ECHIDNA	At1g09330	Q8LEK2	ECH At1g09330 T31J12.5	TVP23_ARATH
Sobic.003G162400	SORBI_3003G162400	acyltransferase-like protein At1g54570, chloroplastic	At1g54570	Q9ZVN2	At1g54570 T22H22.2	Y1457_ARATH
Sobic.003G187800	SORBI_3003G187800	delta(8)-fatty-acid desaturase 2	At2g46210	Q3EBF7	SLD2 At2g46210 T3F17.14	SLD2_ARATH
			At3g61580	Q9ZRP7	SLD1 At3g61580 F2A19.180	SLD1_ARATH
Sobic.003G220000	SORBI_3003G220000	ABC transporter G family member 10	At1g53270	Q9MAH4	ABCG10 WBC10 At1g53270 F12M16.17	AB10G_ARATH
Sobic.003G229700	SORBI_3003G229700	glycerol-3-phosphate acyltransferase 1	At1g06520	Q9SHJ5	GPAT1 At1g06520 F12K11.15	GPAT1_ARATH
Sobic.003G242000	SORBI_3003G242000	long chain acyl-CoA synthetase 4	At4g23850	Q9T0A0	LACS4 At4g23850 T32A16_20	LACS4_ARATH
			At4g11030	Q9T009	LACS5 At4g11030 F8M12.15 T22B4.10	LACS5_ARATH
Sobic.003G266500	SORBI_3003G266500	phosphoethanolamine N-methyltransferase 1	At1g73600	Q9C6B9	NMT3 At1g73600 F25P22.1 F6D5.1	PEAM3_ARATH
			At3g18000	Q9FR44	NMT1 PEAMT XPL1 At3g18000 MEB5.22	PEAM1_ARATH
			At1g48600	Q944H0	NMT2 PMEAMT At1g48600 T1N15.22/T1N15.23 T1N15_20	PEAM2_ARATH
Sobic.003G266600	SORBI_3003G266600	phosphomethylethanolamine N-methyltransferase	At1g73600	Q9C6B9	NMT3 At1g73600 F25P22.1 F6D5.1	PEAM3_ARATH
			At3g18000	Q9FR44	NMT1 PEAMT XPL1 At3g18000 MEB5.22	PEAM1_ARATH
			At1g48600	Q944H0	NMT2 PMEAMT At1g48600 T1N15.22/T1N15.23 T1N15_20	PEAM2_ARATH
Sobic.003G277700	SORBI_3003G277700	probable choline kinase 2	At1g74320	Q8L518	At1g74320 F1O17.1	CK2_ARATH
Sobic.003G278800	SORBI_3003G278800	GDSL esterase/lipase At4g10955	At2g05260	Q9SJ35	At2g05260 C24_LOCUS7427 F5G3.16 F5G3_16	Q9SJ35_ARATH
Sobic.003G301900	SORBI_3003G301900	phosphatidate cytidylyltransferase 1	At4g22340	F4JL60	CDS2 At4g22340 T10I14.170 T10I14_170	F4JL60_ARATH
			At1g62430	O04928	CDS1 At1g62430 F24O1.17	CDS1_ARATH
Sobic.003G304200	SORBI_3003G304200	triacylglycerol lipase SDP1	At5g04040	Q9LZA6	SDP1 At5g04040 F8F6.10 F8F6.250	SDP1_ARATH
			At3g57140	Q9M1I6	SDP1L At3g57140 F24I3.220	SDP1L_ARATH
Sobic.003G305200	SORBI_3003G305200	glycerophosphodiester phosphodiesterase GDPD6	At1g74210	Q9C907	GDPD5 At1g74210 F1O17.12	GDPD5_ARATH
			At5g08030	Q9SD81	GDPD6 At5g08030 F13G24.230	GDPD6_ARATH
Sobic.003G309300	SORBI_3003G309300	lipoyl synthase, chloroplastic	At5g08415	Q8LEE8	LISC_ARATH	LIP1P At5g08415 F8L15.140
Sobic.003G309600	SORBI_3003G309600	O-acyltransferase WSD1	At2g38995	F4IU13	At2g38995	F4IU13_ARATH
			At5g53390	Q5KS41	FOP FOLDED PETAL 1 FOP1 NTHASE WSD11 At5g53390 C24_LOCUS25428 K19E1.19 K19E1_19	Q5KS41_ARATH
			At1g72110	Q9C7H4	At1g72110 F28P5.3 F28P5_3	Q9C7H4_ARATH
			At5g22490	Q9FK89	MQJ16.3 MQJ16_3 At5g22490	Q9FK89_ARATH
			At3g49210	Q9M3B1	F2K15.70 At3g49210 C24_LOCUS15149	Q9M3B1_ARATH
			At3g49200	Q9M3B2	F2K15.60 At3g49200	Q9M3B2_ARATH
			At3g49190	Q9M3B3	F2K15.50 At3g49190 At3g49190/F2K15_50	Q9M3B3_ARATH
			At5g37300	Q93ZR6	WSD1 At5g37300 MNJ8.9	WSD1_ARATH
Sobic.003G317500	SORBI_3003G317500	probable 1-acyl-sn-glycerol-3-phosphate acyltransferase 5	At3g18850	Q9LHN4	LPAT5 LPAAT5 At3g18850 MCB22.2	LPAT5_ARATH
Sobic.003G321900	SORBI_3003G321900	CDP-diacylglycerol--glycerol-3-phosphate 3-phosphatidyltransferase 1, chloroplastic	At4g04870	Q93YW7	CLS PGP3 At4g04870 T4B21.19	CLS_ARATH
Sobic.003G326200	SORBI_3003G326200	non-specific lipid transfer protein-like 1	At4g30880	F4JR37	At4g30880 F6I18.210 F6I18_210	F4JR37_ARATH
Sobic.003G326300	SORBI_3003G326300	uncharacterized LOC8055252	At4g30880	F4JR37	At4g30880 F6I18.210 F6I18_210	F4JR37_ARATH
Sobic.003G327800	SORBI_3003G327800	cytochrome P450 98A1-like	At2g40890	O22203	CYP98A3 C3'H REF8 At2g40890 T20B5.9	C98A3_ARATH
Sobic.003G333000	SORBI_3003G333000	non-specific lipid transfer protein GPI-anchored 2	At3g43720	Q9LZH5	LTPG2 XYP5 At3g43720 T28A8.10	LTPG2_ARATH
Sobic.003G337400	SORBI_3003G337400	trans-cinnamate 4-monooxygenase	At2g30490	P92994	CYP73A5 CYP73 At2g30490 T6B20.16	TCMO_ARATH
Sobic.003G346100	SORBI_3003G346100	uncharacterized LOC8057756	At1g06515	A8MSB8	At1g06515	A8MSB8_ARATH
			At2g30942	F4IPU5	At2g30942	F4IPU5_ARATH
Sobic.003G354400	SORBI_3003G354400	acyl-coenzyme A oxidase 3, peroxisomal	At1g06290	P0CZ23	ACX3 At1g06290 F9P14.15 F9P14_11 T2D23.1	ACOX3_ARATH
			At1g06310	Q9LMI7	ACX3.2 At1g06310 T2D23.2	ACO32_ARATH
Sobic.003G356500	SORBI_3003G356500	non-specific lipid-transfer protein	At5g05960	Q8LBY9	At5g05960 C24_LOCUS21304 K18J17.13 K18J17_13	Q8LBY9_ARATH
			At3g53980	Q9M329	F5K20_280 At3g53980 C24_LOCUS15653	Q9M329_ARATH
Sobic.003G357100	SORBI_3003G357100	phosphatidylinositol:ceramide inositolphosphotransferase	At3g54020	Q9M325	IPCS1 ERHL2 At3g54020 F5K20.320	IPCS1_ARATH
			At2g37940	Q9SH93	IPCS2 ERH1 At2g37940 T8P21.15	IPCS2_ARATH
Sobic.003G360700	SORBI_3003G360700	glycerol-3-phosphate 2-O-acyltransferase 6	At2g38110	O80437	GPAT6 At2g38110 F16M14.4	GPAT6_ARATH
Sobic.003G362000	SORBI_3003G362000	probable 3-deoxy-D-manno-octulosonic acid transferase, mitochondrial	At5g03770	Q8VZA5	KDTA At5g03770 F17C15.190 MED24.5	KDTA_ARATH
Sobic.003G377100	SORBI_3003G377100	stearoyl-[acyl-carrier-protein] 9-desaturase 1, chloroplastic	At1g43800	Q84VY3	S-ACP-DES6 AAD6 SAD6 At1g43800 F28H19.7	STAD6_ARATH
Sobic.003G385500	SORBI_3003G385500	linoleate 9S-lipoxygenase 2	At3g22400	Q9LUW0	LOX5 At3g22400 MCB17.13	LOX5_ARATH
			At1g55020	Q06327	LOX1 At1g55020 F14C21.3 F14C21.54 T24C10.13	LOX1_ARATH
Sobic.003G385900	SORBI_3003G385900	linoleate 9S-lipoxygenase 2	At3g22400	Q9LUW0	LOX5 At3g22400 MCB17.13	LOX5_ARATH
			At1g55020	Q06327	LOX1 At1g55020 F14C21.3 F14C21.54 T24C10.13	LOX1_ARATH
Sobic.003G387100	SORBI_3003G387100	probable membrane-associated 30 kDa protein, chloroplastic	At1g65260	O80796	VIPP1 At1g65260 T8F5.2	VIPP1_ARATH
Sobic.003G387300	SORBI_3003G387300	ABC transporter G family member 5	At2g13610	Q9SIT6	ABCG5 WBC5 At2g13610 T10F5.15	AB5G_ARATH
Sobic.003G394100	SORBI_3003G394100	uncharacterized LOC8056135	At2g19880	F4ITI0	At2g19880 C24_LOCUS8197 F6F22.9 F6F22_9	F4ITI0_ARATH
Sobic.003G398200	SORBI_3003G398200	regulatory protein viviparous-1	At3g24650	Q01593	ABI3 At3g24650 MSD24.2	ABI3_ARATH
Sobic.003G412700	SORBI_3003G412700	long chain base biosynthesis protein 2d	At5g23670	Q9LSZ9	LCB2a LCB2 At5g23670 MQM1.6	LCB2A_ARATH
			At3g48780	Q9M304	LCB2b LCB2.2 SPT1 At3g48780 T21J18_50	LCB2B_ARATH
Sobic.003G418700	SORBI_3003G418700	probable feruloyl esterase A	At5g18640	F4JY30	At5g18640 T1A4.20 T1A4_20	F4JY30_ARATH
			At5g18630	Q6DBI3	At5g18630 T1A4.10 T1A4_10	Q6DBI3_ARATH
Sobic.003G430100	SORBI_3003G430100	non-specific phospholipase C2	At2g26870	O81020	NPC2 At2g26870 F12C20.9	NPC2_ARATH
Sobic.003G443400	SORBI_3003G443400	glycerol-3-phosphate dehydrogenase [NAD(+)]	At5g40610	Q9SCX9	DHAPRD At5g40610 MNF13.16	GPDA1_ARATH
Sobic.003G444600	SORBI_3003G444600	protein TRIGALACTOSYLDIACYLGLYCEROL 2, chloroplastic	At3g20320	Q9LTR2	TGD2 ABCI15 At3g20320 MQC12.6	TGD2_ARATH
Sobic.004G016400	SORBI_3004G016400	choline/ethanolaminephosphotransferase 1	At1g13560	O82567	AAPT1 At1g13560 F13B4.5	AAPT1_ARATH
			At3g25585	O82568	AAPT2 At3g25585 MWL2 T5M7	AAPT2_ARATH
Sobic.004G024200	SORBI_3004G024200	bax inhibitor 1	At5g47120	Q9LD45	BI-1 At5g47120 K14A3.7	BI1_ARATH
Sobic.004G037900	SORBI_3004G037900	L-arabinokinase	At5g20730	P93022	ARF7 BIP IAA21 IAA23 IAA25 NPH4 TIR5 At5g20730 T1M15.130	ARFG_ARATH
			At1g19220	Q8RYC8	ARF19 IAA22 At1g19220 T29M8.9	ARFS_ARATH
Sobic.004G058200	SORBI_3004G058200	choline-phosphate cytidylyltransferase 1	At2g32260	Q9ZV56	CCT1 CCT At2g32260 T32F6.22	CCT1_ARATH
Sobic.004G062500	SORBI_3004G062500	probable 4-coumarate--CoA ligase 3	At1g51680	Q42524	4CL1 At1g51680 F19C24.11	4CL1_ARATH
Sobic.004G063600	SORBI_3004G063600	protein CYPRO4	At3g19240	Q9LJK5	At3g19240	Q9LJK5_ARATH
Sobic.004G064000	SORBI_3004G064000	protein ECERIFERUM 3	At5g57800	Q8H1Z0	CER3 FLP1 WAX2 YRE At5g57800 MTI20.3	CER3_ARATH
Sobic.004G083000	SORBI_3004G083000	phosphatidylinositol/phosphatidylcholine transfer protein SFH2	At1g55840	Q8W580	At1g55840 C24_LOCUS4603 F14J16.8 F14J16_8	Q8W580_ARATH
Sobic.004G084800	SORBI_3004G084800		At5g25390	Q3E958	SHN3 ERF005 At5g25390 F18G18.130	SHN3_ARATH
			At5g11190	Q9LFN7	SHN2 ERF004 At5g11190 F2I11.80	SHN2_ARATH
Sobic.004G086800	SORBI_3004G086800	3-ketoacyl-CoA synthase 11	At2g26640	O48780	KCS11 At2g26640 F18A8.1	KCS11_ARATH
Sobic.004G088100	SORBI_3004G088100	palmitoyl-acyl carrier protein thioesterase, chloroplastic	At1g08510	Q9SJE2	FATB FATB1 At1g08510 T27G7.19	FATB_ARATH
Sobic.004G124200	SORBI_3004G124200	peroxisomal fatty acid beta-oxidation multifunctional protein	At4g29010	Q9ZPI6	AIM1 At4g29010 F19B15.40	AIM1_ARATH
Sobic.004G130500	SORBI_3004G130500	GDSL esterase/lipase 7	At4g10950	F4JN67	At4g10950 F25I24.160 F25I24_160	F4JN67_ARATH
Sobic.004G152800	SORBI_3004G152800	3-oxoacyl-[acyl-carrier-protein] reductase 4	At1g24360	P33207	At1g24360 F21J9.2 F3I6.30	FABG_ARATH
Sobic.004G157300	SORBI_3004G157300	glycerophosphodiester phosphodiesterase GDPD1, chloroplastic	At3g02040	Q9SGA2	GDPD1 SRG3 At3g02040 F1C9.18	GDPD1_ARATH
Sobic.004G158000	SORBI_3004G158000	uncharacterized protein DDB_G0271670	At2g33510	F4IFU5	At2g33510 F4P9.28 F4P9_28	F4IFU5_ARATH
Sobic.004G169000	SORBI_3004G169000	digalactosyldiacylglycerol synthase 1, chloroplastic	At3g11670	Q9S7D1	DGD1 At3g11670 T19F11.7	DGDG1_ARATH
Sobic.004G176200	SORBI_3004G176200	phosphoinositide phosphatase SAC7	At5g66020	Q7X911	SAC6 IBS2 SAC1B At5g66020 K2A18.9	SAC6_ARATH
			At3g51460	Q9C5G5	SAC7 RHD4 SAC1C At3g51460 F26O13.100	SAC7_ARATH
Sobic.004G178100	SORBI_3004G178100	NADPH-dependent pterin aldehyde reductase	At1g10310	Q9SY73	At1g10310 F14N23.19	PTALR_ARATH
Sobic.004G193700	SORBI_3004G193700	ASC1-like protein 1	At1g13580	Q6NQI8	At1g13580 F13B4.7 F21F23.1	LAG13_ARATH
			At3g25540	Q9LDF2	LAG1 At3g25540 MWL2.19	LAG11_ARATH
Sobic.004G203900	SORBI_3004G203900	very-long-chain 3-oxoacyl-CoA reductase 1	At1g67730	Q8L9C4	KCR1 At-YBR159 GL8 At1g67730 F12A21.31	KCR1_ARATH
Sobic.004G212500	SORBI_3004G212500	phosphatidyl-N-methylethanolamine N-methyltransferase	At1g80860	Q9SAH5	PLMT At1g80860 F23A5.21	PLMT_ARATH
Sobic.004G218100	SORBI_3004G218100	protein ECERIFERUM 1	At1g02205	F4HVY0	CER1 At1g02205 T7I23.10	CER1_ARATH
Sobic.004G237600	SORBI_3004G237600	sphinganine C4-monooxygenase 1	At1g69640	Q8VYI1	SBH1 At1g69640 F24J1.22 T6C23.16	SBH1_ARATH
Sobic.004G252400	SORBI_3004G252400	ASC1-like protein 2	At1g13580	Q6NQI8	At1g13580 F13B4.7 F21F23.1	LAG13_ARATH
			At3g25540	Q9LDF2	LAG1 At3g25540 MWL2.19	LAG11_ARATH
Sobic.004G260600	SORBI_3004G260600	fatty acid desaturase DES2	At3g12120	P46313	FAD2 At3g12120 T21B14.6 T21B14_107 T23B7.6	FAD6E_ARATH
Sobic.004G261900	SORBI_3004G261900	diacylglycerol O-acyltransferase 2D	At3g51520	Q9ASU1	DGAT2 At3g51520 F26O13.160	DGAT2_ARATH
Sobic.004G268300	SORBI_3004G268300	lipid phosphate phosphatase epsilon 1, chloroplastic	At3g50920	F4J220	LPPE1 At3g50920 F18B3.200	LPPE1_ARATH
			At5g66450	Q6NQL6	LPPE2 At5g66450 K1F13.10	LPPE2_ARATH
Sobic.004G269700	SORBI_3004G269700	3-dehydrosphinganine reductase TSC10A	At5g19200	F4JZN6	TSC10B At5g19200 T24G5	TC10B_ARATH
			At3g06060	Q0WRJ2	TSC10A At3g06060 F24F17.4	TC10A_ARATH
Sobic.004G272700	SORBI_3004G272700	probable 4-coumarate--CoA ligase 2	At1g65060	Q9S777	4CL3 At1g65060 F16G16.6	4CL3_ARATH
Sobic.004G283600	SORBI_3004G283600	lysophospholipid acyltransferase 1	At1g12640	F4IDU4	LPLAT1 LPCAT1 At1g12640 T12C24.17	MBOA1_ARATH
			At1g63050	Q9CAN8	LPLAT2 LPCAT2 At1g63050 F16M19.14	MBOA2_ARATH
Sobic.004G293100	SORBI_3004G293100	probable lipid phosphate phosphatase beta	At4g22550	Q9SUW4	LPPB At4g22550 F7K2.130	LPPB_ARATH
Sobic.004G297600	SORBI_3004G297600	phospholipase A1-Ibeta2, chloroplastic	At4g16820	O23522	At4g16820 dl4435w FCAALL.42	PLA14_ARATH
Sobic.004G310000	SORBI_3004G310000	uncharacterized LOC8075202	At1g56630	F4I568	At1g56630 F25P12.93 F25P12_93	F4I568_ARATH
			At5g42930	F4K4J2	MBD2.13 MBD2_13 At5g42930	F4K4J2_ARATH
Sobic.004G319300	SORBI_3004G319300	uncharacterized LOC8082688	At3g14075	Q94AB1	At3g14075	Q94AB1_ARATH
Sobic.004G324100	SORBI_3004G324100	diacylglycerol kinase 7	At4g30340	F4JQ95	DGK7 At4g30340 F17I23.320	DGK7_ARATH
			At5g57690	Q1PDI2	DGK4 At5g57690 MRI1.5	DGK4_ARATH
			At2g18730	Q8VZG1	DGK3 At2g18730 MSF3.11	DGK3_ARATH
Sobic.004G325700	SORBI_3004G325700	protein CYPRO4	At3g19240	Q9LJK5	At3g19240	Q9LJK5_ARATH
Sobic.004G334000	SORBI_3004G334000	probable monogalactosyldiacylglycerol synthase 3, chloroplastic	At5g20410	O82730	MGD2 MGDB At5g20410 F5O24.300 F7C8	MGDG2_ARATH
Sobic.004G342200	SORBI_3004G342200	protein PHOSPHATE STARVATION RESPONSE 2	At1g07720	Q9LQP8	KCS3 At1g07720 F24B9.18	KCS3_ARATH
			At2g28630	Q9SIB2	KCS12 At2g28630 T8O18.8	KCS12_ARATH
Sobic.005G000100	SORBI_3005G000100	caffeoylshikimate esterase	At2g39410	O80628	At2g39410 C24_LOCUS10249 F12L6.7 F12L6_7	O80628_ARATH
			At3g55190	Q9M3D0	T26I12.70 At3g55190	Q9M3D0_ARATH
Sobic.005G017200	SORBI_3005G017200	ethanolamine-phosphate cytidylyltransferase	At2g38670	Q9ZVI9	PECT1 At2g38670 T6A23.13	PECT1_ARATH
Sobic.005G021000	SORBI_3005G021000	AP2-like ethylene-responsive transcription factor At1g79700	At3g54320	Q6X5Y6	WRI1 ASML1 At3g54320 T12E18.10 T12E18.20	WRI1_ARATH
Sobic.005G056000	SORBI_3005G056000	CBS domain-containing protein CBSCBSPB3	At1g77590	Q9CAP8	LACS9 At1g77590 T5M16.18	LACS9_ARATH
			At2g04350	Q9SJD4	LACS8 At2g04350 T1O3 T23O15.3	LACS8_ARATH
Sobic.005G063300	SORBI_3005G063300	fatty acyl-CoA reductase 1	At3g44550	Q0WRB0	FAR5 At3g44550 F14L2.100	FACR5_ARATH
			At3g44560	Q1PEI6	FAR8 At3g44560 F14L2.110	FACR8_ARATH
			At3g44540	Q9LXN3	FAR4 At3g44540 F14L2.90	FACR4_ARATH
			At4g33790	Q93ZB9	FAR3 CER4 At4g33790 T16L1.280	FACR3_ARATH
Sobic.005G063400	SORBI_3005G063400	fatty acyl-CoA reductase 1	At3g44550	Q0WRB0	FAR5 At3g44550 F14L2.100	FACR5_ARATH
			At3g44560	Q1PEI6	FAR8 At3g44560 F14L2.110	FACR8_ARATH
			At3g44540	Q9LXN3	FAR4 At3g44540 F14L2.90	FACR4_ARATH
			At4g33790	Q93ZB9	FAR3 CER4 At4g33790 T16L1.280	FACR3_ARATH
Sobic.005G072200	SORBI_3005G072200	lipase-like PAD4	At3g52430	Q9S745	PAD4 EDS9 At3g52430 F22O6.190	PAD4_ARATH
Sobic.005G104500	SORBI_3005G104500	phosphatidylinositol 4-kinase beta 1	At5g09350	Q0WPX9	PI4KB2 PI4KBETA2 At5g09350 T5E8.150	P4KB2_ARATH
			At5g64070	Q9FMJ0	PI4KB1 PI4K PI4KBETA1 At5g64070 MHJ24.5	P4KB1_ARATH
Sobic.005G110000	SORBI_3005G110000		At3g57312	Q9M2L8	F28O9.160 At3g57312	Q9M2L6_ARATH
Sobic.005G110040	SORBI_3005G110040		At3g57312	Q9M2L8	F28O9.160 At3g57312	Q9M2L6_ARATH
Sobic.005G110080	SORBI_3005G110080		At3g57313	Q9M2L9	F28O9.160 At3g57313	Q9M2L6_ARATH
Sobic.005G111400	SORBI_3005G111400	phospholipase A1 EG1, chloroplastic/mitochondrial	At1g05800	Q9MA46	DGL DAL6 At1g05800 T20M3.6	PLA12_ARATH
			At2g31690	Q9SIN9	At2g31690 T9H9.21	PLA13_ARATH
Sobic.005G126800	SORBI_3005G126800	long chain base biosynthesis protein 2a	At5g23670	Q9LSZ9	LCB2a LCB2 At5g23670 MQM1.6	LCB2A_ARATH
			At3g48780	Q9M304	LCB2b LCB2.2 SPT1 At3g48780 T21J18_50	LCB2B_ARATH
Sobic.005G144300	SORBI_3005G144300	patatin-like phospholipase domain-containing protein 4	At1g33270	Q6NPP7	At1g33270 C24_LOCUS3274 T16O9.13 T16O9_13	Q6NPP7_ARATH
Sobic.005G170100	SORBI_3005G170100	non-specific phospholipase C4	At3g03540	Q9S816	NPC5 At3g03540 T12J13.18 T21P5.4	NPC5_ARATH
			At3g03520	Q9SRQ6	NPC3 At3g03520 T21P5.6	NPC3_ARATH
			At3g03530	Q9SRQ7	NPC4 At3g03530 T21P5.5	NPC4_ARATH
Sobic.005G186100	SORBI_3005G186100	patatin-like protein 1	At4g37060	F4JR91	PLP5 AP22.93 AP22_93 AtPLAIVB PATATIN-like protein 5 phospholipase A IVB PLA IVB At4g37060	F4JR91_ARATH
			At4g37070	O23179	PLP1 At4g37070 AP22.83 C7A10.290	PLP1_ARATH
			At4g37050	O23181	PLP3 At4g37050 AP22.16 C7A10.310	PLP3_ARATH
Sobic.005G186200	SORBI_3005G186200	patatin-like protein 1	At4g37060	F4JR91	PLP5 AP22.93 AP22_93 AtPLAIVB PATATIN-like protein 5 phospholipase A IVB PLA IVB At4g37060	F4JR91_ARATH
			At4g37070	O23179	PLP1 At4g37070 AP22.83 C7A10.290	PLP1_ARATH
			At4g37050	O23181	PLP3 At4g37050 AP22.16 C7A10.310	PLP3_ARATH
Sobic.005G186400	SORBI_3005G186400	patatin-like protein 2	At4g37060	F4JR91	PLP5 AP22.93 AP22_93 AtPLAIVB PATATIN-like protein 5 phospholipase A IVB PLA IVB At4g37060	F4JR91_ARATH
			At4g37070	O23179	PLP1 At4g37070 AP22.83 C7A10.290	PLP1_ARATH
			At4g37050	O23181	PLP3 At4g37050 AP22.16 C7A10.310	PLP3_ARATH
Sobic.005G197100	SORBI_3005G197100	1-acyl-sn-glycerol-3-phosphate acyltransferase PLS1	At3g57650	Q8LG50	LPAT2 LPAAT2 At3g57650 F15B8.160	LPAT2_ARATH
Sobic.005G218000	SORBI_3005G218000	uncharacterized LOC8070246	At3g23530	Q8VZH1	At3g23530	Q8VZH1_ARATH
Sobic.005G222200	SORBI_3005G222200	ATP-citrate synthase alpha chain protein 2	At1g09430	O80526	ACLA-3 At1g09430 F19J9.9	ACLA3_ARATH
Sobic.006G002400	SORBI_3006G002400	fatty acid amide hydrolase	At5g64440	Q7XJJ7	FAAH At5g64440 T12B11.3	FAAH_ARATH
Sobic.006G011200	SORBI_3006G011200	pyruvate dehydrogenase E1 component subunit alpha-3, chloroplastic	At1g01090	O24457	PDH-E1 ALPHA At1g01090 T25K16.8	ODPA3_ARATH
Sobic.006G033700	SORBI_3006G033700	probable long-chain-alcohol O-fatty-acyltransferase 5	At3g51970	Q9SV07	ASAT1 At3g51970 F4F15.80	ASAT1_ARATH
Sobic.006G043700	SORBI_3006G043700	3-oxoacyl-[acyl-carrier-protein] reductase 4	At1g24360	P33207	At1g24360 F21J9.2 F3I6.30	FABG_ARATH
Sobic.006G054800	SORBI_3006G054800	glycerophosphodiester phosphodiesterase GDPD1, chloroplastic	At3g02040	Q9SGA2	GDPD1 SRG3 At3g02040 F1C9.18	GDPD1_ARATH
Sobic.006G060000	SORBI_3006G060000	probable CDP-diacylglycerol--inositol 3-phosphatidyltransferase 2	At4g38570	Q8GUK6	PIS2 At4g38570 F20M13.130	PIS2_ARATH
			At1g68000	Q8LBA6	PIS1 At1g68000 T23K23.15	PIS1_ARATH
Sobic.006G066400	SORBI_3006G066400	cytochrome P450 77A4	At3g10570	Q9SQY7	F13M14.15 ''cytochrome P450 CYP77A6 cytochrome P450 F18K10.15 family 77 polypeptide 6 polypeptide 6'' subfamily A At3g10570	Q9SQY7_ARATH
Sobic.006G075100	SORBI_3006G075100	digalactosyldiacylglycerol synthase 1, chloroplastic	At3g11670	Q9S7D1	DGD1 At3g11670 T19F11.7	DGDG1_ARATH
Sobic.006G094500	SORBI_3006G094500	trihelix transcription factor ASIL2	At1g54060	Q9SYG2	ASIL1 At1g54060 F15I1.14	ASIL1_ARATH
Sobic.006G123200	SORBI_3006G123200	probable long-chain-alcohol O-fatty-acyltransferase 5	At3g51970	Q9SV07	ASAT1 At3g51970 F4F15.80	ASAT1_ARATH
Sobic.006G125600	SORBI_3006G125600	very-long-chain 3-oxoacyl-CoA reductase 1	At1g67730	Q8L9C4	KCR1 At-YBR159 GL8 At1g67730 F12A21.31	KCR1_ARATH
Sobic.006G125800	SORBI_3006G125800	very-long-chain 3-oxoacyl-CoA reductase 1	At1g67730	Q8L9C4	KCR1 At-YBR159 GL8 At1g67730 F12A21.31	KCR1_ARATH
Sobic.006G143600	SORBI_3006G143600	peroxygenase	At4g26740	O81270	PXG1 ATS1 CLO1 At4g26740 F10M23.80	PXG1_ARATH
			At5g55240	Q9FLN9	PXG2 ATS2 CLO2 At5g55240 MCO15.19	PXG2_ARATH
Sobic.006G144500	SORBI_3006G144500	protein ECERIFERUM 1	At1g02205	F4HVY0	CER1 At1g02205 T7I23.10	CER1_ARATH
Sobic.006G157100	SORBI_3006G157100	sphingolipid delta(4)-desaturase DES1-like	At4g04930	Q9ZPH4	At4g04930 T1J1.1	DES1L_ARATH
Sobic.006G167700	SORBI_3006G167700	oleosin Zm-I	At4g25140	P29525	At4g25140 F13M23.280	OLEO1_ARATH
			At5g51210	Q43284	OL3 At5g51210 MWD22.16	OLEO3_ARATH
Sobic.006G171700	SORBI_3006G171700	protein TRIGALACTOSYLDIACYLGLYCEROL 1, chloroplastic	At1g19800	Q8L4R0	TGD1 ABCI14 At1g19800 F14P1.27	TGD1_ARATH
Sobic.006G177000	SORBI_3006G177000	cytochrome P450 86A2	At4g00360	O23066	CYP86A2 ATT1 At4g00360 A_IG005I10.21 F5I10.21	C86A2_ARATH
			At2g45970	O80823	CYP86A8 LCR At2g45970 F4I18.5	C86A8_ARATH
			At1g63710	Q9CAD6	CYP86A7 At1g63710 F24D7.10	C86A7_ARATH
			At1g01600	Q9LMM1	CYP86A4 At1g01600 F22L4.14	C86A4_ARATH
Sobic.006G211000	SORBI_3006G211000	protein ECERIFERUM 26-like	At3g23840	Q9LIS1	CER26L At3g23840 F14O13.3	CR26L_ARATH
			At4g13840	Q9SVM9	CER26 At4g13840 F18A5.230	CER26_ARATH
Sobic.006G213700	SORBI_3006G213700	peroxisomal 2,4-dienoyl-CoA reductase	At3g12800	Q9LTV6	At3g12800 MBK21.23	DECR2_ARATH
Sobic.006G213800	SORBI_3006G213800	peroxisomal 2,4-dienoyl-CoA reductase	At3g12800	Q9LTV6	At3g12800 MBK21.23	DECR2_ARATH
Sobic.006G214500	SORBI_3006G214500	lecithin-cholesterol acyltransferase-like 4	At4g19860	Q71N54	LCAT4 At4g19860 T16H5.220	LCAT4_ARATH
Sobic.006G237000	SORBI_3006G237000	3-oxoacyl-[acyl-carrier-protein] synthase III, chloroplastic	At1g62640	P49243	At1g62640 F23N19.2 T3P18.20	FABH_ARATH
Sobic.006G239800	SORBI_3006G239800	glycerol kinase	At1g80460	Q9M8L4	GLPK GLI1 NHO1 At1g80460 T21F11.21	GLPK_ARATH
Sobic.006G270900	SORBI_3006G270900	acyl-CoA-binding domain-containing protein 1	At5g53470	Q9SM23	ACBP1 ACBP At5g53470 MYN8.8	ACBP1_ARATH
			At4g27780	Q9STP8	ACBP2 At4g27780 T27E11.20	ACBP2_ARATH
Sobic.007G001600	SORBI_3007G001600	non-specific lipid-transfer protein 2P	At3g57314	Q9M2L10	F28O9.160 At3g57314	Q9M2L6_ARATH
Sobic.007G008900	SORBI_3007G008900	phosphoinositide phosphatase SAC1	At1g22620	Q7XZU3	SAC1 FIG4 FRA7 At1g22620 F12K8.3 T22J18.20	SAC1_ARATH
Sobic.007G011300	SORBI_3007G011300	phospholipase SGR2	At1g31480	Q8W5R2	SGR2 At1g31480 F27M3.29 T8E3.1	SHGR2_ARATH
Sobic.007G026200	SORBI_3007G026200	uncharacterized LOC8074057	At1g08640	Q93WG3	CJD1 Chloroplast J-like domain 1 At1g08640 F22O13.12 F22O13_12	Q93WG3_ARATH
Sobic.007G052700	SORBI_3007G052700	acyl-CoA-binding protein	At1g31812	P57752	ACBP6 At1g31812 F5M6.27	ACBP6_ARATH
Sobic.007G054500	SORBI_3007G054500	ABC transporter G family member 14	At1g31770	Q9C6W5	ABCG14 WBC14 At1g31770 F27M3.2 F5M6.22	AB14G_ARATH
Sobic.007G062000	SORBI_3007G062000	diacylglycerol kinase 5	At4g28130	F4JKI3	DGK6 At4g28130 F26K10.10 T13J8.230	DGK6_ARATH
			At2g20900	Q9C5E5	DGK5 At2g20900 F5H14.13	DGK5_ARATH
Sobic.007G065600	SORBI_3007G065600	fatty acid desaturase 4, chloroplastic	At1g62190	O04584	FAD4L1 At1g62190 F19K23.12	FD4L1_ARATH
			At2g22890	O81006	FAD4L2 At2g22890 T20K9.10	FD4L2_ARATH
			At4g27030	Q9SZ42	FAD4 FADA At4g27030 F10M23.370	FAD4_ARATH
Sobic.007G077400	SORBI_3007G077400	enoyl-[acyl-carrier-protein] reductase, mitochondrial	At3g45770	Q8LCU7	At3g45770 T6D9.100	MECR_ARATH
Sobic.007G079600	SORBI_3007G079600	3-hydroxyacyl-[acyl-carrier-protein] dehydratase FabZ	At5g10160	Q9LX13	At5g10160 C24_LOCUS21701 T31P16.150 T31P16_150	Q9LX13_ARATH
			At2g22230	Q9SIE3	At2g22230 T26C19.11 T26C19_11	Q9SIE3_ARATH
Sobic.007G091200	SORBI_3007G091200	probable long-chain-alcohol O-fatty-acyltransferase 1	At3g51970	Q9SV07	ASAT1 At3g51970 F4F15.80	ASAT1_ARATH
Sobic.007G122400	SORBI_3007G122400	protein HOTHEAD	At1g72970	Q9S746	HTH ACE At1g72970 F3N23.17	HTH_ARATH
Sobic.007G133000	SORBI_3007G133000	putative 1-phosphatidylinositol-3-phosphate 5-kinase FAB1C	At1g71010	Q9SSJ8	FAB1C At1g71010 F15H11.20	FAB1C_ARATH
Sobic.007G134800	SORBI_3007G134800	dihydrolipoyllysine-residue acetyltransferase component 4 of pyruvate dehydrogenase complex, chloroplastic	At3g25860	Q9SQI8	LTA2 At3g25860 MPE11.1	ODP24_ARATH
Sobic.007G138800	SORBI_3007G138800	myb-related protein 306	At3g28910	Q9SCU7	MYB30 hsr1 At3g28910 MLD15.8	MYB30_ARATH
Sobic.007G138900	SORBI_3007G138900	myb-related protein 306	At3g28910	Q9SCU7	MYB30 hsr1 At3g28910 MLD15.8	MYB30_ARATH
Sobic.007G140800	SORBI_3007G140800	omega-6 fatty acid desaturase, chloroplastic	At4g30950	P46312	FAD6 FADC At4g30950 F6I18.140	FAD6C_ARATH
Sobic.007G151100	SORBI_3007G151100	12-oxophytodienoate reductase 7	At2g06050	Q9FUP0	OPR3 DDE1 At2g06050 F5K7.19	OPR3_ARATH
Sobic.007G162400	SORBI_3007G162400	ABC transporter G family member 4	At5g52860	Q9FLX5	ABCG8 WBC8 At5g52860 MXC20.8	AB8G_ARATH
			At4g25750	Q9SW08	ABCG4 WBC4 At4g25750 F14M19.30	AB4G_ARATH
Sobic.007G163100	SORBI_3007G163100	mediator of RNA polymerase II transcription subunit 15a	At2g40220	A0MES8	ABI4 ERF052 GIN6 ISI3 SAN5 SIS5 SUN6 At2g40220 T7M7.16	ABI4_ARATH
Sobic.007G165800	SORBI_3007G165800	BAHD acyltransferase DCR	At5g23940	Q9FF86	DCR PEL3 At5g23940 MRO11.2	DCR_ARATH
Sobic.007G170800	SORBI_3007G170800	fatty acyl-CoA reductase 1	At3g44550	Q0WRB0	FAR5 At3g44550 F14L2.100	FACR5_ARATH
			At3g44560	Q1PEI6	FAR8 At3g44560 F14L2.110	FACR8_ARATH
			At3g44540	Q9LXN3	FAR4 At3g44540 F14L2.90	FACR4_ARATH
			At4g33790	Q93ZB9	FAR3 CER4 At4g33790 T16L1.280	FACR3_ARATH
Sobic.007G173100	SORBI_3007G173100		At3g10550	F4J3T8	MTM1 At3g10550 F13M14.17 F18K10.13	MYTM1_ARATH
			At5g04540	F4JWB3	MTM2 At5g04540 T32M21.150	MYTM2_ARATH
Sobic.007G176800	SORBI_3007G176800	acyl carrier protein 3, chloroplastic	At5g27200	O04652	ACP5 At5g27200 TM21B4.6	ACP5_ARATH
			At3g05020	P11829	ACP1 At3g05020 T9J14.3	ACP1_ARATH
			At1g54580	P25701	ACP2 A1 ACL1.2 At1g54580 T22H22.3	ACP2_ARATH
			At1g54630	P25702	ACP3 A2 ACL1.3 At1g54630 T22H22.7	ACP3_ARATH
Sobic.007G180700	SORBI_3007G180700	non-specific lipid-transfer protein C4	At5g62080	Q8GT78	MTG10.3 MTG10_3 At5g62080 At5g62080/mtg10_100	Q8GT78_ARATH
			At5g52160	Q9LTK4	At5g52160 C24_LOCUS25296 F17P19.6 F17P19_6	Q9LTK4_ARATH
Sobic.007G192200	SORBI_3007G192200	non-specific lipid transfer protein GPI-anchored 1	At1g27950	Q9C7F7	LTPG1 At1g27950 F13K9.6	LTPG1_ARATH
Sobic.007G198300	SORBI_3007G198300	type II inositol polyphosphate 5-phosphatase 15	At1g05630	Q9SYK4	IP5P13 5PTASE13 IPP6 At1g05630 F3F20.8	IP5PD_ARATH
Sobic.007G203500	SORBI_3007G203500	auxin response factor 21	At5g20730	P93022	ARF7 BIP IAA21 IAA23 IAA25 NPH4 TIR5 At5g20730 T1M15.130	ARFG_ARATH
			At1g19220	Q8RYC8	ARF19 IAA22 At1g19220 T29M8.9	ARFS_ARATH
Sobic.007G209800	SORBI_3007G209800	3-oxoacyl-[acyl-carrier-protein] reductase	At1g62610	F4HYU6	At1g62610 T3P18.17 T3P18_17	F4HYU6_ARATH
			At1g63380	F4I227	At1g63380 F2K11.24 F2K11_24	F4I227_ARATH
			At3g46170	Q9LX78	F12M12_140 At3g46170	Q9LX78_ARATH
			At3g55310	Q67Z59	At3g55310 C24_LOCUS15787	Q67Z59_ARATH
			At3g55290	Q94AL3	SDRd REDUCTASE ISOFORM d SHORT-CHAIN DEHYDROGENASE At3g55290	Q94AL3_ARATH
Sobic.007G210700	SORBI_3007G210700	ETHYLENE INSENSITIVE 3-like 3 protein	At3g45140	P38418	LOX2 At3g45140 T14D3.80	LOX2_ARATH
Sobic.008G000100	SORBI_3008G000100	caffeoylshikimate esterase	At2g39410	O80628	At2g39410 C24_LOCUS10249 F12L6.7 F12L6_7	O80628_ARATH
			At3g55190	Q9M3D0	T26I12.70 At3g55190	Q9M3D0_ARATH
Sobic.008G010800	SORBI_3008G010800	long chain acyl-CoA synthetase 6, peroxisomal	At3g05970	Q8LPS1	LACS6 At3g05970 F2O10.7	LACS6_ARATH
Sobic.008G030700	SORBI_3008G030700	non-specific lipid-transfer protein	At5g59310	Q9LLR6	LTP4 At5g59310 MNC17.22	NLTP4_ARATH
			At2g38530	Q9S7I3	LTP2 CDF3 At2g38530 T6A23.27	NLTP2_ARATH
			At3g51600	Q9XFS7	LTP5 At3g51600 F26O13.240	NLTP5_ARATH
			At2g15050	Q9ZUK6	LTP7 At2g15050 T15J14.9	NLTP7_ARATH
			At2g38540	Q42589	LTP1 At2g38540 T6A23.26	NLTP1_ARATH
Sobic.008G030900	SORBI_3008G030900	non-specific lipid-transfer protein 1	At5g59310	Q9LLR6	LTP4 At5g59310 MNC17.22	NLTP4_ARATH
			At2g38530	Q9S7I3	LTP2 CDF3 At2g38530 T6A23.27	NLTP2_ARATH
			At3g51600	Q9XFS7	LTP5 At3g51600 F26O13.240	NLTP5_ARATH
			At2g15050	Q9ZUK6	LTP7 At2g15050 T15J14.9	NLTP7_ARATH
			At2g38540	Q42589	LTP1 At2g38540 T6A23.26	NLTP1_ARATH
Sobic.008G031200	SORBI_3008G031200	pentatricopeptide repeat-containing protein At4g18840	At5g59310	Q9LLR6	LTP4 At5g59310 MNC17.22	NLTP4_ARATH
			At2g38530	Q9S7I3	LTP2 CDF3 At2g38530 T6A23.27	NLTP2_ARATH
			At3g51600	Q9XFS7	LTP5 At3g51600 F26O13.240	NLTP5_ARATH
			At2g15050	Q9ZUK6	LTP7 At2g15050 T15J14.9	NLTP7_ARATH
			At2g38540	Q42589	LTP1 At2g38540 T6A23.26	NLTP1_ARATH
Sobic.008G038900	SORBI_3008G038900		At5g66020	Q7X911	SAC6 IBS2 SAC1B At5g66020 K2A18.9	SAC6_ARATH
			At3g51460	Q9C5G5	SAC7 RHD4 SAC1C At3g51460 F26O13.100	SAC7_ARATH
Sobic.008G112100	SORBI_3008G112100	1-acyl-sn-glycerol-3-phosphate acyltransferase PLS1	At3g57650	Q8LG50	LPAT2 LPAAT2 At3g57650 F15B8.160	LPAT2_ARATH
Sobic.008G116400	SORBI_3008G116400	acyl carrier protein 1, chloroplastic	At5g27200	O04652	ACP5 At5g27200 TM21B4.6	ACP5_ARATH
			At3g05020	P11829	ACP1 At3g05020 T9J14.3	ACP1_ARATH
			At1g54580	P25701	ACP2 A1 ACL1.2 At1g54580 T22H22.3	ACP2_ARATH
			At1g54630	P25702	ACP3 A2 ACL1.3 At1g54630 T22H22.7	ACP3_ARATH
Sobic.008G132700	SORBI_3008G132700	ATP-citrate synthase alpha chain protein 3	At1g09430	O80526	ACLA-3 At1g09430 F19J9.9	ACLA3_ARATH
Sobic.008G173000	SORBI_3008G173000	pyruvate dehydrogenase E1 component subunit beta-3, chloroplastic	At2g34590	O64688	E1-BETA-2 At2g34590 T31E10.7	ODPB3_ARATH
			At1g30120	Q9C6Z3	PDH-E1 BETA E1-BETA-1 At1g30120 T2H7.8	ODPB2_ARATH
Sobic.008G181400	SORBI_3008G181400	dihydroceramide fatty acyl 2-hydroxylase FAH1	At2g34770	O48916	FAH1 At2g34770 T29F13.2	FAH1_ARATH
Sobic.008G183400	SORBI_3008G183400	phospholipase D alpha 1	At1g52570	Q9SSQ9	PLDALPHA2 PLD2 At1g52570 F6D8.21	PLDA2_ARATH
			At3g15730	Q38882	PLDALPHA1 PLD1 At3g15730 MSJ11.13	PLDA1_ARATH
Sobic.009G014600	SORBI_3009G014600	phospholipase A1-II 7	At4g18550	O49523	DSEL At4g18550 F28J12.210	DSEL_ARATH
Sobic.009G032100	SORBI_3009G032100	nitrogen regulatory protein P-II homolog	At4g01900	Q9ZST4	GLB1 GLNB1 At4g01900 T7B11.16	GLNB_ARATH
Sobic.009G034600	SORBI_3009G034600	diacylglycerol O-acyltransferase 3, cytosolic	At1g48300	Q9C5W0	DGAT3 At1g48300 F11A17.15	DGAT3_ARATH
Sobic.009G052200	SORBI_3009G052200	dihydrolipoyl dehydrogenase 1, chloroplastic	At4g16155	F4JLP5	LPD2 At4g16155 FCAALL.61	PLPD2_ARATH
Sobic.009G054000	SORBI_3009G054000	Golgi apparatus membrane protein-like protein ECHIDNA	At1g09330	Q8LEK2	ECH At1g09330 T31J12.5	TVP23_ARATH
Sobic.009G083300	SORBI_3009G083300	ABC transporter G family member 12	At3g21090	Q8RWI9	ABCG15 WBC15 WBC22 At3g21090 MSA6.13	AB15G_ARATH
			At1g51500	Q9C8K2	ABCG12 CER5 D3 WBC12 At1g51500 F5D21.6	AB12G_ARATH
Sobic.009G111400	SORBI_3009G111400	glyoxysomal fatty acid beta-oxidation multifunctional protein MFP-a	At3g06860	Q9ZPI5	MFP2 At3g06860 F17A9.1	MFP2_ARATH
Sobic.009G112500	SORBI_3009G112500	caffeoylshikimate esterase	At3g62860	F4IZK0	At3g62860	F4IZK0_ARATH
			At2g47630	O22248	At2g47630 C24_LOCUS11130 F17A22.2	O22248_ARATH
Sobic.009G117500	SORBI_3009G117500	lipase	At5g18640	F4JY30	At5g18640 T1A4.20 T1A4_20	F4JY30_ARATH
			At5g18630	Q6DBI3	At5g18630 T1A4.10 T1A4_10	Q6DBI3_ARATH
Sobic.009G123300	SORBI_3009G123300	UDP-sulfoquinovose synthase, chloroplastic	At4g33030	O48917	SQD1 At4g33030 F26P21.150	SQD1_ARATH
Sobic.009G135100	SORBI_3009G135100	lipase	At1g23330	Q9LR26	At1g23330 C24_LOCUS2393 F26F24.20 F26F24_20	Q9LR26_ARATH
			At1g10740	Q9SAC8	At1g10740 T16B5.12 T16B5_12	Q9SAC8_ARATH
Sobic.009G152600	SORBI_3009G152600	soluble inorganic pyrophosphatase	At1g01050	Q93V56	PPA1 At1g01050 T25K16.5	IPYR1_ARATH
Sobic.009G152800	SORBI_3009G152800		At5g10160	Q9LX13	At5g10160 C24_LOCUS21701 T31P16.150 T31P16_150	Q9LX13_ARATH
			At2g22230	Q9SIE3	At2g22230 T26C19.11 T26C19_11	Q9SIE3_ARATH
Sobic.009G159000	SORBI_3009G159000	phosphatidylinositol:ceramide inositolphosphotransferase	At3g54020	Q9M325	IPCS1 ERHL2 At3g54020 F5K20.320	IPCS1_ARATH
			At2g37940	Q9SH93	IPCS2 ERH1 At2g37940 T8P21.15	IPCS2_ARATH
Sobic.009G162000	SORBI_3009G162000	glycerol-3-phosphate acyltransferase 5	At3g11430	Q9CAY3	GPAT5 At3g11430 F24K9.10	GPAT5_ARATH
			At5g06090	Q9LHS7	GPAT7 At5g06090 K16F4.5	GPAT7_ARATH
Sobic.009G165400	SORBI_3009G165400	phosphatidate phosphatase PAH1	At3g09560	Q9SF47	PAH1 At3g09560 F11F8.14	PAH1_ARATH
Sobic.009G178500	SORBI_3009G178500	non-specific lipid transfer protein GPI-anchored 2	At3g43720	Q9LZH5	LTPG2 XYP5 At3g43720 T28A8.10	LTPG2_ARATH
Sobic.009G181800	SORBI_3009G181800	cytochrome P450 98A1	At2g40890	O22203	CYP98A3 C3'H REF8 At2g40890 T20B5.9	C98A3_ARATH
Sobic.009G188900	SORBI_3009G188900	probable 1-acyl-sn-glycerol-3-phosphate acyltransferase 5	At3g18850	Q9LHN4	LPAT5 LPAAT5 At3g18850 MCB22.2	LPAT5_ARATH
Sobic.009G211000	SORBI_3009G211000	probable choline kinase 2	At1g74320	Q8L518	At1g74320 F1O17.1	CK2_ARATH
Sobic.009G218900	SORBI_3009G218900	phosphomethylethanolamine N-methyltransferase	At1g73600	Q9C6B9	NMT3 At1g73600 F25P22.1 F6D5.1	PEAM3_ARATH
			At3g18000	Q9FR44	NMT1 PEAMT XPL1 At3g18000 MEB5.22	PEAM1_ARATH
			At1g48600	Q944H0	NMT2 PMEAMT At1g48600 T1N15.22/T1N15.23 T1N15_20	PEAM2_ARATH
Sobic.009G221500	SORBI_3009G221500	lipid phosphate phosphatase 2	At3g02600	Q8LFD1	LPP3 At3g02600 F16B3.23	LPP3_ARATH
			At1g15080	Q9XI60	LPP2 PAP2 At1g15080 F9L1.2	LPP2_ARATH
Sobic.009G221900	SORBI_3009G221900	non-specific lipid-transfer protein 2	At3g18280	Q9LJQ3	At3g18280 C24_LOCUS13066	Q9LJQ3_ARATH
			At1g48750	Q94AQ3	At1g48750 C24_LOCUS3875 F11I4.8 F11I4_8	Q94AQ3_ARATH
Sobic.009G222000	SORBI_3009G222000	probable non-specific lipid-transfer protein 2	At3g18280	Q9LJQ3	At3g18280 C24_LOCUS13066	Q9LJQ3_ARATH
			At1g48750	Q94AQ3	At1g48750 C24_LOCUS3875 F11I4.8 F11I4_8	Q94AQ3_ARATH
Sobic.009G225100	SORBI_3009G225100	CDP-diacylglycerol--serine O-phosphatidyltransferase 2	At1g15110	F4HXY6	PSS1 AtPSS1 phosphatidylserine synthase 1 At1g15110 C24_LOCUS1557 F9L1.4 F9L1_4	F4HXY6_ARATH
Sobic.009G226600	SORBI_3009G226600	O-acyltransferase WSD1	At2g38995	F4IU13	At2g38995	F4IU13_ARATH
			At5g53390	Q5KS41	FOP FOLDED PETAL 1 FOP1 NTHASE WSD11 At5g53390 C24_LOCUS25428 K19E1.19 K19E1_19	Q5KS41_ARATH
			At1g72110	Q9C7H4	At1g72110 F28P5.3 F28P5_3	Q9C7H4_ARATH
			At5g22490	Q9FK89	MQJ16.3 MQJ16_3 At5g22490	Q9FK89_ARATH
			At3g49210	Q9M3B1	F2K15.70 At3g49210 C24_LOCUS15149	Q9M3B1_ARATH
			At3g49200	Q9M3B2	F2K15.60 At3g49200	Q9M3B2_ARATH
			At3g49190	Q9M3B3	F2K15.50 At3g49190 At3g49190/F2K15_50	Q9M3B3_ARATH
			At5g37300	Q93ZR6	WSD1 At5g37300 MNJ8.9	WSD1_ARATH
Sobic.009G236100	SORBI_3009G236100	3-ketoacyl-CoA synthase 4	At1g19440	Q9LN49	KCS4 At1g19440 F18O14.21	KCS4_ARATH
Sobic.009G241900	SORBI_3009G241900	oleosin 1	At3g18570	Q9LII2	At3g18570 C24_LOCUS13100	Q9LII2_ARATH
			At1g48990	Q9M9A1	At1g48990 At1g48990/F27J15_22 F27J15.22 F27J15_22	Q9M9A1_ARATH
Sobic.010G012800	SORBI_3010G012800	acyl-CoA-binding protein	At1g31812	P57752	ACBP6 At1g31812 F5M6.27	ACBP6_ARATH
Sobic.010G033300	SORBI_3010G033300	palmitoyl-acyl carrier protein thioesterase, chloroplastic	At1g08510	Q9SJE2	FATB FATB1 At1g08510 T27G7.19	FATB_ARATH
Sobic.010G043200	SORBI_3010G043200	mitogen-activated protein kinase 1	At2g43790	Q39026	MPK6 At2g43790 F18O19.10	MPK6_ARATH
Sobic.010G047300	SORBI_3010G047300	GDSL esterase/lipase At4g01130	At2g30550	Q3EBR6	At2g30550 T6B20.10	PLA16_ARATH
			At1g51440	Q9C8J6	At1g51440 F5D21.19	PLA17_ARATH
			At1g06800	Q941F1	At1g06800 F4H5.11 F4H5_10	PLA15_ARATH
Sobic.010G049100	SORBI_3010G049100	peroxisomal acyl-coenzyme A oxidase 1	At4g16760	O65202	ACX1 At4g16760 dl4405c FCAALL.119	ACOX1_ARATH
			At2g35690	Q9ZQP2	ACX1.2 At2g35690 T20F21.12	ACO12_ARATH
Sobic.010G052200	SORBI_3010G052200	caffeoyl-CoA O-methyltransferase 1	At4g34050	O49499	CCOAOMT1 At4g34050 F28A23.190	CAMT4_ARATH
Sobic.010G081100	SORBI_3010G081100	uncharacterized LOC8077349	At1g56630	F4I568	At1g56630 F25P12.93 F25P12_93	F4I568_ARATH
			At5g42930	F4K4J2	MBD2.13 MBD2_13 At5g42930	F4K4J2_ARATH
Sobic.010G084300	SORBI_3010G084300	putative 12-oxophytodienoate reductase 5	At1g76690	Q8GYB8	OPR2 At1g76690 F28O16.6	OPR2_ARATH
Sobic.010G084400	SORBI_3010G084400	12-oxophytodienoate reductase 1	At1g76690	Q8GYB8	OPR2 At1g76690 F28O16.6	OPR2_ARATH
Sobic.010G084600	SORBI_3010G084600	12-oxophytodienoate reductase 1	At1g76690	Q8GYB8	OPR2 At1g76690 F28O16.6	OPR2_ARATH
Sobic.010G092200	SORBI_3010G092200	sphinganine C4-monooxygenase 1	At1g69641	Q8VYI2	SBH1 At1g69640 F24J1.22 T6C23.17	SBH1_ARATH
Sobic.010G105000	SORBI_3010G105000	probable peroxygenase 5	At1g70670	Q9CAB7	PXG4 CLO4 At1g70670 F5A18.15	PXG4_ARATH
			At1g70680	Q9CAB8	PXG5 CLO4 CLO5 At1g70680 F5A18.14	PXG5_ARATH
Sobic.010G105800	SORBI_3010G105800	uncharacterized LOC8065747	At5g37710	F4K8L2	At5g37710 K12B20.160 K12B20_160	F4K8L2_ARATH
Sobic.010G118200	SORBI_3010G118200	phosphatidylinositol 4-kinase gamma 5	At1g13640	Q8W4R8	PI4KG6 PI4KGAMMA6 At1g13640 F21F23.8	P4KG6_ARATH
			At1g26270	Q9C671	PI4KG5 PI4KGAMMA5 At1g26270 F28B23.7	P4KG5_ARATH
			At2g03890	Q9SI52	PI4KG7 PI4KGAMMA7 UBDKGAMMA7 At2g03890 T18C20.9	P4KG7_ARATH
Sobic.010G139500	SORBI_3010G139500	putative phospholipid-transporting ATPase 9	At3g25610	Q9LI83	ALA10 At3g25610 T5M7.5	ALA10_ARATH
			At1g13210	Q9SAF5	ALA11 At1g13210 F3F19.24	ALA11_ARATH
			At1g68710	Q9SX33	ALA9 At1g68710 F24J5.6	ALA9_ARATH
Sobic.010G171000	SORBI_3010G171000	probable phospholipid-transporting ATPase 4	At1g17500	Q9LNQ4	ALA4 At1g17500 F1L3.21	ALA4_ARATH
			At3g13900	Q9LVK9	ALA7 At3g13900 MDC16.2	ALA7_ARATH
			At1g72700	Q9SGG3	ALA5 At1g72700 F28P22.11	ALA5_ARATH
			At1g54280	Q9SLK6	ALA6 At1g54280 F20D21.10	ALA6_ARATH
Sobic.010G180400	SORBI_3010G180400	palmitoyl-acyl carrier protein thioesterase, chloroplastic	At1g08510	Q9SJE2	FATB FATB1 At1g08510 T27G7.19	FATB_ARATH
Sobic.010G181500	SORBI_3010G181500	3-ketoacyl-CoA synthase 11	At2g26640	O48780	KCS11 At2g26640 F18A8.1	KCS11_ARATH
Sobic.010G185300	SORBI_3010G185300	ethylene-responsive transcription factor WIN1	At5g25390	Q3E958	SHN3 ERF005 At5g25390 F18G18.130	SHN3_ARATH
			At5g11190	Q9LFN7	SHN2 ERF004 At5g11190 F2I11.80	SHN2_ARATH
Sobic.010G187500	SORBI_3010G187500	phosphatidylinositol/phosphatidylcholine transfer protein SFH9	At1g55840	Q8W580	At1g55840 C24_LOCUS4603 F14J16.8 F14J16_8	Q8W580_ARATH
Sobic.010G190300	SORBI_3010G190300	lipid phosphate phosphatase 2	At3g02600	Q8LFD1	LPP3 At3g02600 F16B3.23	LPP3_ARATH
			At1g15080	Q9XI60	LPP2 PAP2 At1g15080 F9L1.2	LPP2_ARATH
Sobic.010G193300	SORBI_3010G193300	lipid phosphate phosphatase 2	At3g02600	Q8LFD1	LPP3 At3g02600 F16B3.23	LPP3_ARATH
			At1g15080	Q9XI60	LPP2 PAP2 At1g15080 F9L1.2	LPP2_ARATH
Sobic.010G210900	SORBI_3010G210900	probable long-chain-alcohol O-fatty-acyltransferase 5	At3g51970	Q9SV07	ASAT1 At3g51970 F4F15.80	ASAT1_ARATH
Sobic.010G212600	SORBI_3010G212600	protein ECERIFERUM 3	At5g57800	Q8H1Z0	CER3 FLP1 WAX2 YRE At5g57800 MTI20.3	CER3_ARATH
Sobic.010G214900	SORBI_3010G214900	probable 4-coumarate--CoA ligase 4	At1g51680	Q42524	4CL1 At1g51680 F19C24.11	4CL1_ARATH
Sobic.010G223300	SORBI_3010G223300	probable CDP-diacylglycerol--inositol 3-phosphatidyltransferase 2	At4g38570	Q8GUK6	PIS2 At4g38570 F20M13.130	PIS2_ARATH
			At1g68000	Q8LBA6	PIS1 At1g68000 T23K23.15	PIS1_ARATH
Sobic.010G261200	SORBI_3010G261200	lipid transfer-like protein VAS	At1g62790	Q6NLF7	At1g62790 F23N19.16 F23N19_16	Q6NLF7_ARATH
Sobic.010G261500	SORBI_3010G261500	lysophospholipid acyltransferase LPEAT2	At2g45670	Q8S8S2	LPEAT2 At2g45670 F17K2.20	LPCT2_ARATH
