# Supplementary material for: Major impacts of widespread structural variation on sorghum
Source: HighWire-hosted journal article supplement (doi:10.1101/gr.278396.123), 2024-02-01
Supplement: Supplemental_Table_S15.xlsx [file Supplemental_Table_S15.xlsx]

## Sheet: Sheet1
Supplemental Table S15 Sorghum oil orthologs associated with CNV type SVs
Sorghum ortholog IDs	Sorghum ortholog IDs in NCBI	impact_HIGH	impact_LOW	impact_MODERATE	impact_MODIFIER	3_prime_UTR_truncation	3_prime_UTR_variant	5_prime_UTR_truncation	5_prime_UTR_variant	conservative_inframe_deletion	conservative_inframe_insertion	disruptive_inframe_deletion	disruptive_inframe_insertion	downstream_gene_variant	duplication	exon_loss_variant	exon_region	frameshift_variant	initiator_codon_variant	intron_variant	missense_variant	non_coding_transcript_exon_variant	non_coding_transcript_variant	splice_acceptor_variant	splice_donor_variant	splice_region_variant	start_lost	start_retained_variant	stop_gained	stop_lost	stop_retained_variant	synonymous_variant	transcript_ablation	upstream_gene_variant
Sobic.001G003300	SORBI_3001G003300		1		5		1							1						1			1			1								1
Sobic.001G005700	SORBI_3001G005700
Sobic.001G008600	SORBI_3001G008600				3									1																				2
Sobic.001G023100	SORBI_3001G023100				2									1						1
Sobic.001G029200	SORBI_3001G029200				5									5
Sobic.001G050300	SORBI_3001G050300			2	12									3	2					1														8
Sobic.001G059500	SORBI_3001G059500				6									3																				3
Sobic.001G066700	SORBI_3001G066700		1		5		1							2									1			1								1
Sobic.001G069700	SORBI_3001G069700				5				1					2																				2
Sobic.001G077400	SORBI_3001G077400			1	5									3	1																			2
Sobic.001G086500	SORBI_3001G086500				2		1													1
Sobic.001G111700	SORBI_3001G111700	1		3	3									1	3																		1	2
Sobic.001G118300	SORBI_3001G118300				1																													1
Sobic.001G120400	SORBI_3001G120400
Sobic.001G121900	SORBI_3001G121900				4									2																				2
Sobic.001G125800	SORBI_3001G125800		1		9									2						4						1								4
Sobic.001G125900	SORBI_3001G125900				7									3						1														3
Sobic.001G128500	SORBI_3001G128500	1		1	7		3							2	1																		1	2
Sobic.001G155500	SORBI_3001G155500				3									1																				2
Sobic.001G175600	SORBI_3001G175600				3				1														1											1
Sobic.001G200800	SORBI_3001G200800			3	7									1	3																			6
Sobic.001G200900	SORBI_3001G200900			3	5									2	3																			3
Sobic.001G215000	SORBI_3001G215000	2		1	12				2					4	1								1										2	5
Sobic.001G222700	SORBI_3001G222700		2		5									3	2																			2
Sobic.001G230100	SORBI_3001G230100				2																													2
Sobic.001G270400	SORBI_3001G270400	3			9									5						1													3	3
Sobic.001G282900	SORBI_3001G282900	1		1	11									5	1			1		4				1		1								3
Sobic.001G286600	SORBI_3001G286600			1	2									1	1																			1
Sobic.001G290000	SORBI_3001G290000				4																													4
Sobic.001G295700	SORBI_3001G295700	1			4									2																			1	2
Sobic.001G302300	SORBI_3001G302300		1		6		1							4									1			1
Sobic.001G320200	SORBI_3001G320200	3		4	11									1	4					1													3	9
Sobic.001G329800	SORBI_3001G329800	2		3	20		3							6	3																		2	11
Sobic.001G333900	SORBI_3001G333900	1			5									3																			1	2
Sobic.001G345100	SORBI_3001G345100	6			8				1					3									1										6	3
Sobic.001G360900	SORBI_3001G360900	3		3	5									3	3					2													3
Sobic.001G403400	SORBI_3001G403400				6									1																				5
Sobic.001G409000	SORBI_3001G409000				4									1																				3
Sobic.001G412100	SORBI_3001G412100	3	1		4				1					1	1			1		3					1	3								2
Sobic.001G413700	SORBI_3001G413700				3									1																				2
Sobic.001G424600	SORBI_3001G424600	3		3											3																		3
Sobic.001G427900	SORBI_3001G427900	3		3	2									2	3																		3
Sobic.001G433900	SORBI_3001G433900	1		2	9									5	2																		1	4
Sobic.001G434900	SORBI_3001G434900	1		2	12									7	2																		1	5
Sobic.001G453200	SORBI_3001G453200				6									4																				2
Sobic.001G473200	SORBI_3001G473200	13		4	45									17	4																		13	28
Sobic.001G481900	SORBI_3001G481900				1									1
Sobic.001G482300	SORBI_3001G482300				8		1							2						1														4
Sobic.001G483400	SORBI_3001G483400				6									1																				5
Sobic.001G499100	SORBI_3001G499100				3									1																				2
Sobic.001G510000	SORBI_3001G510000	2		1	9		1					1		5	1			1								1	2							3
Sobic.001G510300	SORBI_3001G510300			1	8									4	1																			4
Sobic.001G510400	SORBI_3001G510400			1	8									5	1																			3
Sobic.001G524300	SORBI_3001G524300			2	6									4	2																			2
Sobic.001G527200	SORBI_3001G527200	2		4	16									9	4																		2	7
Sobic.001G543700	SORBI_3001G543700	1			3									2	1														1					1
Sobic.002G000600	SORBI_3002G000600		2		7									2	2																			5
Sobic.002G010100	SORBI_3002G010100	1			7									4						1													1	2
Sobic.002G050400	SORBI_3002G050400	1			4									3																			1	1
Sobic.002G070200	SORBI_3002G070200	7			16									8				1		4					1	1							6	5
Sobic.002G078300	SORBI_3002G078300	1			15				1					8									1										1	5
Sobic.002G081500	SORBI_3002G081500				3									1																				2
Sobic.002G109100	SORBI_3002G109100			1	12		1							3	1																			8
Sobic.002G122700	SORBI_3002G122700				6									1																				5
Sobic.002G131300	SORBI_3002G131300				2									1																				1
Sobic.002G131500	SORBI_3002G131500				6									5																				1
Sobic.002G134100	SORBI_3002G134100	1		2	11									3	2					3													1	5
Sobic.002G167100	SORBI_3002G167100			1	10									6	1					2														2
Sobic.002G175400	SORBI_3002G175400				10									6																				4
Sobic.002G181800	SORBI_3002G181800				6									1						1														4
Sobic.002G201300	SORBI_3002G201300	5		2	3		1	1	1	2		1				1											2						3	1
Sobic.002G206200	SORBI_3002G206200		1		12		3							5						3						1								2
Sobic.002G214400	SORBI_3002G214400				2																													2
Sobic.002G215700	SORBI_3002G215700				9									4																				5
Sobic.002G218500	SORBI_3002G218500				6									1																				5
Sobic.002G235900	SORBI_3002G235900
Sobic.002G256900	SORBI_3002G256900	3		6	3		1							1	6					1													3
Sobic.002G261300	SORBI_3002G261300	3		6	6									1	6																		3	5
Sobic.002G265300	SORBI_3002G265300				4									3																				1
Sobic.002G267500	SORBI_3002G267500
Sobic.002G270900	SORBI_3002G270900				5									3																				2
Sobic.002G271900	SORBI_3002G271900				1																													1
Sobic.002G277900	SORBI_3002G277900				1									1
Sobic.002G280400	SORBI_3002G280400				3									2																				1
Sobic.002G283600	SORBI_3002G283600			1	9									7	1																			2
Sobic.002G302900	SORBI_3002G302900				4				1					1									1											1
Sobic.002G339500	SORBI_3002G339500				10									7																				3
Sobic.002G341600	SORBI_3002G341600				3				1					1																				1
Sobic.002G374600	SORBI_3002G374600				3									2																				1
Sobic.002G378000	SORBI_3002G378000				7		1		2					1																				3
Sobic.002G403100	SORBI_3002G403100	3		3	5									3	3					1													3	1
Sobic.002G418200	SORBI_3002G418200	3		4	9									5	4																		3	4
Sobic.002G430100	SORBI_3002G430100				3		1							1																				1
Sobic.002G430500	SORBI_3002G430500				4									2						2
Sobic.003G028900	SORBI_3003G028900				4									1						1														2
Sobic.003G038000	SORBI_3003G038000	1			4		1							2				1												1				1
Sobic.003G045700	SORBI_3003G045700	3		5	24									12	5																		3	12
Sobic.003G064800	SORBI_3003G064800	4		2	15									7	2																		4	8
Sobic.003G092800	SORBI_3003G092800				7															1														6
Sobic.003G095800	SORBI_3003G095800				11									6																				5
Sobic.003G109100	SORBI_3003G109100	6		3	3									1	3																		6	2
Sobic.003G109200	SORBI_3003G109200	6	2	3	13		3							6	3								2			2							6	2
Sobic.003G127200	SORBI_3003G127200				2									1																				1
Sobic.003G131200	SORBI_3003G131200	1		1	7									3	1																		1	4
Sobic.003G145900	SORBI_3003G145900				2									1																				1
Sobic.003G146900	SORBI_3003G146900	3			2															1													3	1
Sobic.003G149400	SORBI_3003G149400	3		6	4										6					1													3	3
Sobic.003G150200	SORBI_3003G150200	3		6	8		1							2	6																		3	5
Sobic.003G153700	SORBI_3003G153700				5									2						1														2
Sobic.003G162400	SORBI_3003G162400			3	3									2	3																			1
Sobic.003G187800	SORBI_3003G187800	1			4									2																			1	2
Sobic.003G220000	SORBI_3003G220000				4									1																				3
Sobic.003G229700	SORBI_3003G229700	4		4	23			1						8	4	2				4					1	2							2	12
Sobic.003G242000	SORBI_3003G242000	1		6	8									4	6																		1	4
Sobic.003G266500	SORBI_3003G266500				5									2																				3
Sobic.003G266600	SORBI_3003G266600		1		7		1							2						1			1			1								2
Sobic.003G277700	SORBI_3003G277700				2																													2
Sobic.003G278800	SORBI_3003G278800				12									2																				10
Sobic.003G301900	SORBI_3003G301900				1																													1
Sobic.003G304200	SORBI_3003G304200			1	6							1		5																				1
Sobic.003G305200	SORBI_3003G305200
Sobic.003G309300	SORBI_3003G309300			1	2									1	1																			1
Sobic.003G309600	SORBI_3003G309600				2									1																				1
Sobic.003G317500	SORBI_3003G317500				5				1					3																				1
Sobic.003G321900	SORBI_3003G321900	1		1	6									2	1																		1	4
Sobic.003G326200	SORBI_3003G326200	1		7	9									5	7																		1	4
Sobic.003G326300	SORBI_3003G326300	1		7	7									3	7																		1	4
Sobic.003G327800	SORBI_3003G327800	1		7	7									3	7					1													1	3
Sobic.003G333000	SORBI_3003G333000	1		7	6									2	7																		1	4
Sobic.003G337400	SORBI_3003G337400	4		1	5									3	1																		4	2
Sobic.003G346100	SORBI_3003G346100	3			2															1													3	1
Sobic.003G354400	SORBI_3003G354400	1			5									1																			1	4
Sobic.003G356500	SORBI_3003G356500	1		1	4									2	1																		1	2
Sobic.003G357100	SORBI_3003G357100	1		1	10									3	1																		1	7
Sobic.003G360700	SORBI_3003G360700	2		1	12									4	1					2													2	6
Sobic.003G362000	SORBI_3003G362000				8									4																				4
Sobic.003G377100	SORBI_3003G377100	2		1	11									7	1																		2	4
Sobic.003G385500	SORBI_3003G385500				7									4																				3
Sobic.003G385900	SORBI_3003G385900				7									6																				1
Sobic.003G387100	SORBI_3003G387100	3		3	6									3	3					1													3	2
Sobic.003G387300	SORBI_3003G387300	3		3	7				3					3	3																		3	1
Sobic.003G394100	SORBI_3003G394100	3		7	10									5	7																		3	5
Sobic.003G398200	SORBI_3003G398200	3		6	12									7	6					1													3	4
Sobic.003G412700	SORBI_3003G412700	1	3		23		3							9									3			3							1	8
Sobic.003G418700	SORBI_3003G418700		1		9		1							3									1			1								4
Sobic.003G430100	SORBI_3003G430100	1	1	1	17				1					7	2					2					1	2								9
Sobic.003G443400	SORBI_3003G443400	1		1	3					1				1		1				1														1
Sobic.003G444600	SORBI_3003G444600		1		9		1		1					3									2			1								2
Sobic.004G016400	SORBI_3004G016400	6		4	10									6	4																		6	4
Sobic.004G024200	SORBI_3004G024200				10									6						1														3
Sobic.004G037900	SORBI_3004G037900			3	11									5	3																			6
Sobic.004G058200	SORBI_3004G058200			1	6									3	1					1														2
Sobic.004G062500	SORBI_3004G062500				5									2																				3
Sobic.004G063600	SORBI_3004G063600				5									5
Sobic.004G064000	SORBI_3004G064000				7									2						4														1
Sobic.004G083000	SORBI_3004G083000	3			1									1																			3
Sobic.004G084800	SORBI_3004G084800	3			11				1					1																			3	9
Sobic.004G086800	SORBI_3004G086800	3			8		1							1																			3	6
Sobic.004G088100	SORBI_3004G088100	4			9									4																			4	5
Sobic.004G124200	SORBI_3004G124200	3			7									2						2													3	3
Sobic.004G130500	SORBI_3004G130500			1	5									1	1					1														3
Sobic.004G152800	SORBI_3004G152800		1		16		1							11						1			1			1								2
Sobic.004G157300	SORBI_3004G157300				5									1						1														3
Sobic.004G158000	SORBI_3004G158000				4																													4
Sobic.004G169000	SORBI_3004G169000	10		4	15				3					5	4	6							2										4	5
Sobic.004G176200	SORBI_3004G176200	4	1	1	22		1							13	1					1			1			1							4	6
Sobic.004G178100	SORBI_3004G178100	4		1	12									7	1																		4	5
Sobic.004G193700	SORBI_3004G193700			3	5									1	3																			4
Sobic.004G203900	SORBI_3004G203900			3	7									1	3																			6
Sobic.004G212500	SORBI_3004G212500			3	4									3	3																			1
Sobic.004G218100	SORBI_3004G218100	5			3										3			2																3
Sobic.004G237600	SORBI_3004G237600				6									1						4														1
Sobic.004G252400	SORBI_3004G252400			3	1										3																			1
Sobic.004G260600	SORBI_3004G260600		2		6		2							4	1								1			2
Sobic.004G261900	SORBI_3004G261900				6									1																				5
Sobic.004G268300	SORBI_3004G268300	4	1	1	9		1							4	1					1			1			1							4	3
Sobic.004G269700	SORBI_3004G269700	3			5				1														1										3	3
Sobic.004G272700	SORBI_3004G272700	3																															3
Sobic.004G283600	SORBI_3004G283600				7									4						1														2
Sobic.004G293100	SORBI_3004G293100			2	10				1					2	2								1											6
Sobic.004G297600	SORBI_3004G297600	1		1	8									4	1																		1	4
Sobic.004G310000	SORBI_3004G310000				3									1						1														1
Sobic.004G319300	SORBI_3004G319300	4			5									1																			4	4
Sobic.004G324100	SORBI_3004G324100	1			11									4						1													1	6
Sobic.004G325700	SORBI_3004G325700				6									5																				1
Sobic.004G334000	SORBI_3004G334000	3			5									3																			3	2
Sobic.004G342200	SORBI_3004G342200	3			7									6																			3	1
Sobic.005G000100	SORBI_3005G000100				1																													1
Sobic.005G017200	SORBI_3005G017200				3									2																				1
Sobic.005G021000	SORBI_3005G021000				3																													3
Sobic.005G056000	SORBI_3005G056000			4	9									4	4																			5
Sobic.005G063300	SORBI_3005G063300	18	5		31	1	3							16	3	14		2		6			2	1	1	5				2			3	5
Sobic.005G063400	SORBI_3005G063400	46	2		19					1		1		3	5	34		5		1							6		3				2	15
Sobic.005G072200	SORBI_3005G072200	2			3									3	1			1		1				1		1
Sobic.005G104500	SORBI_3005G104500				6				1					1									1											3
Sobic.005G110000	SORBI_3005G110000	3		4	15									7	4																		3	8
Sobic.005G110040	SORBI_3005G110040	3		4	14									7	4																		3	7
Sobic.005G110080	SORBI_3005G110080	3		4	16									9	4																		3	7
Sobic.005G111400	SORBI_3005G111400	1		1	7									4	1																		1	3
Sobic.005G126800	SORBI_3005G126800				5									4																				1
Sobic.005G144300	SORBI_3005G144300	1		1	11				1					3	1								1										1	6
Sobic.005G170100	SORBI_3005G170100	7		6	12		1							1	6					1													7	9
Sobic.005G186100	SORBI_3005G186100				9									4																				5
Sobic.005G186200	SORBI_3005G186200				8									5																				3
Sobic.005G186400	SORBI_3005G186400			3	11									3	3																			8
Sobic.005G197100	SORBI_3005G197100	1			9									6																			1	3
Sobic.005G218000	SORBI_3005G218000	2			12									6																			2	6
Sobic.005G222200	SORBI_3005G222200	6	1	4	22		1		8					5	4								2			1							6	6
Sobic.006G002400	SORBI_3006G002400				11				1											5			1											4
Sobic.006G011200	SORBI_3006G011200	9		2	12									7	2																		9	5
Sobic.006G033700	SORBI_3006G033700		2		14		2							7									2			2								3
Sobic.006G043700	SORBI_3006G043700				2									1																				1
Sobic.006G054800	SORBI_3006G054800	1	4		22		9							5				1		1			4			4				1				3
Sobic.006G060000	SORBI_3006G060000				4									2																				2
Sobic.006G066400	SORBI_3006G066400	3			5									1																			3	4
Sobic.006G075100	SORBI_3006G075100				8									7																				1
Sobic.006G094500	SORBI_3006G094500	24		9	10									5	9																		24	5
Sobic.006G123200	SORBI_3006G123200	9			3									1																			9	2
Sobic.006G125600	SORBI_3006G125600	12		6	4									2	6					1													12	1
Sobic.006G125800	SORBI_3006G125800	12		6	15									5	6					6													12	4
Sobic.006G143600	SORBI_3006G143600		1	1	14		2							6	1					1			1			1								5
Sobic.006G144500	SORBI_3006G144500				2									1																				1
Sobic.006G157100	SORBI_3006G157100	3		3	2									1	3					1													3
Sobic.006G167700	SORBI_3006G167700
Sobic.006G171700	SORBI_3006G171700		1		7		1							5									1			1
Sobic.006G177000	SORBI_3006G177000				4				1					1																				2
Sobic.006G211000	SORBI_3006G211000	3		2	12									6	2					1													3	5
Sobic.006G213700	SORBI_3006G213700	11		2	30									14	2																		11	16
Sobic.006G213800	SORBI_3006G213800	11		2	27									13	2																		11	14
Sobic.006G214500	SORBI_3006G214500	11		2	29									15	2					1													11	13
Sobic.006G237000	SORBI_3006G237000				1															1
Sobic.006G239800	SORBI_3006G239800				4																													4
Sobic.006G270900	SORBI_3006G270900	1		1	8									3	1																		1	5
Sobic.007G001600	SORBI_3007G001600			2	6									3	2																			3
Sobic.007G008900	SORBI_3007G008900	9		3	2									1	3																		9	1
Sobic.007G011300	SORBI_3007G011300	15		4	19									7	4																		15	12
Sobic.007G026200	SORBI_3007G026200				7									7
Sobic.007G052700	SORBI_3007G052700			1	3									2	1																			1
Sobic.007G054500	SORBI_3007G054500				4									4
Sobic.007G062000	SORBI_3007G062000	4		1	19	1			1					8	1	1		1					1			1				1			3	9
Sobic.007G065600	SORBI_3007G065600				3									1																				2
Sobic.007G077400	SORBI_3007G077400	13			32									14		2				1													11	17
Sobic.007G079600	SORBI_3007G079600				3																													3
Sobic.007G091200	SORBI_3007G091200	2			5				1					1	1												1						1	3
Sobic.007G122400	SORBI_3007G122400
Sobic.007G133000	SORBI_3007G133000		2		35		10							6									2			2								17
Sobic.007G134800	SORBI_3007G134800	1			11									4																			1	7
Sobic.007G138800	SORBI_3007G138800	3			4									1																			3	3
Sobic.007G138900	SORBI_3007G138900	3																															3
Sobic.007G140800	SORBI_3007G140800	1		1	8									2	1																		1	6
Sobic.007G151100	SORBI_3007G151100	3		3	22									2	3					1													3	19
Sobic.007G162400	SORBI_3007G162400				5																													5
Sobic.007G163100	SORBI_3007G163100	9	2		16				1					10	4	5	1	2									1							4
Sobic.007G165800	SORBI_3007G165800				8									2																				6
Sobic.007G170800	SORBI_3007G170800			3	5									2	3					1														2
Sobic.007G173100	SORBI_3007G173100	1		5	8									3	5																		1	5
Sobic.007G176800	SORBI_3007G176800			1	9									5	1																			4
Sobic.007G180700	SORBI_3007G180700		2	1	14		2							7	1								2			2								3
Sobic.007G192200	SORBI_3007G192200			1	7									5	1																			2
Sobic.007G198300	SORBI_3007G198300	5		3	16									3	3																		5	13
Sobic.007G203500	SORBI_3007G203500	5		3	7									2	3																		5	5
Sobic.007G209800	SORBI_3007G209800	3		3	2		1							1	3																		3
Sobic.007G210700	SORBI_3007G210700				2									1																				1
Sobic.008G000100	SORBI_3008G000100	2	1		10		2							5	1					3			1	1		3			1					1
Sobic.008G010800	SORBI_3008G010800	6		3	6										3	2		1		4													3	2
Sobic.008G030700	SORBI_3008G030700	2	2	1	10					1				3	3	1											1							7
Sobic.008G030900	SORBI_3008G030900	2	2	2	21		2							13	2								2			2							2	4
Sobic.008G031200	SORBI_3008G031200	1	2		17	1	5							8		1		1					2			3				1				2
Sobic.008G038900	SORBI_3008G038900	1		8	11									7	8																		1	4
Sobic.008G112100	SORBI_3008G112100	1		1	8									2	1	1				1					1	1								6
Sobic.008G116400	SORBI_3008G116400	3			2									2																			3
Sobic.008G132700	SORBI_3008G132700				8									3																				5
Sobic.008G173000	SORBI_3008G173000	9		3	4										3																		9	4
Sobic.008G181400	SORBI_3008G181400	3	4	2	30		2							20	4			1					2			2							2	6
Sobic.008G183400	SORBI_3008G183400	2		1	18				1					6	1	2				7														4
Sobic.009G014600	SORBI_3009G014600	7		1	10									6	1																		7	4
Sobic.009G032100	SORBI_3009G032100	3		3	5									5	3																		3
Sobic.009G034600	SORBI_3009G034600	3		3	8									7	3																		3	1
Sobic.009G052200	SORBI_3009G052200	1			5									3																			1	2
Sobic.009G054000	SORBI_3009G054000	1			6									2																			1	4
Sobic.009G083300	SORBI_3009G083300				8									6																				2
Sobic.009G111400	SORBI_3009G111400				9									2						1														6
Sobic.009G112500	SORBI_3009G112500				1																													1
Sobic.009G117500	SORBI_3009G117500				3									2																				1
Sobic.009G123300	SORBI_3009G123300	1			4									2																			1	2
Sobic.009G135100	SORBI_3009G135100				5									3																				2
Sobic.009G152600	SORBI_3009G152600				11									7																				4
Sobic.009G152800	SORBI_3009G152800				7									4						2														1
Sobic.009G159000	SORBI_3009G159000	3		3	4									3	3																		3	1
Sobic.009G162000	SORBI_3009G162000	3		4	9									4	4																		3	5
Sobic.009G165400	SORBI_3009G165400	1		1	8									4	1																		1	4
Sobic.009G178500	SORBI_3009G178500	6		6	15									7	6																		6	8
Sobic.009G181800	SORBI_3009G181800	6		3	5									2	3																		6	3
Sobic.009G188900	SORBI_3009G188900	4		1	9									4	1																		4	5
Sobic.009G211000	SORBI_3009G211000
Sobic.009G218900	SORBI_3009G218900	3		6	6									2	6																		3	4
Sobic.009G221500	SORBI_3009G221500	9	1	6	10		1							4	7	4		1		1			1			1			2				3	3
Sobic.009G221900	SORBI_3009G221900	3		6	9									5	6																		3	4
Sobic.009G222000	SORBI_3009G222000	3		6	10				1					6	6																		3	3
Sobic.009G225100	SORBI_3009G225100				5									1																				4
Sobic.009G226600	SORBI_3009G226600				15															12														3
Sobic.009G236100	SORBI_3009G236100		1		8		1							5									1			1								1
Sobic.009G241900	SORBI_3009G241900	6		6	4									1	6																		6	3
Sobic.010G012800	SORBI_3010G012800	6		3	3										3					1													6	2
Sobic.010G033300	SORBI_3010G033300			3	13									8	3																			5
Sobic.010G043200	SORBI_3010G043200	1			8				1					2						1			1										1	3
Sobic.010G047300	SORBI_3010G047300		1		10		1		1					5									2			1								1
Sobic.010G049100	SORBI_3010G049100	2		2	12									7	2																		2	5
Sobic.010G052200	SORBI_3010G052200	1		1	9									5	1																		1	4
Sobic.010G081100	SORBI_3010G081100		1	3	9		1							1	3					1			1			1								5
Sobic.010G084300	SORBI_3010G084300	2		6	16			1		1				6	5	1											1						1	10
Sobic.010G084400	SORBI_3010G084400	1		5	18									7	5																		1	11
Sobic.010G084600	SORBI_3010G084600	5	2	6	20		1			1				8	9	1		1								1	1		2				1	11
Sobic.010G092200	SORBI_3010G092200				1									1
Sobic.010G105000	SORBI_3010G105000			3	8									5	3																			3
Sobic.010G105800	SORBI_3010G105800			3	2									1	3																			1
Sobic.010G118200	SORBI_3010G118200				1																													1
Sobic.010G139500	SORBI_3010G139500				6									3																				3
Sobic.010G171000	SORBI_3010G171000				4									3						1
Sobic.010G180400	SORBI_3010G180400	1			5									2																			1	3
Sobic.010G181500	SORBI_3010G181500				5									4																				1
Sobic.010G185300	SORBI_3010G185300				3																													3
Sobic.010G187500	SORBI_3010G187500	7		4	6									2	4																		7	4
Sobic.010G190300	SORBI_3010G190300	6		3	4									2	3																		6	2
Sobic.010G193300	SORBI_3010G193300	7		4	12									2	4																		7	10
Sobic.010G210900	SORBI_3010G210900				4									2																				2
Sobic.010G212600	SORBI_3010G212600	1			9									1				1		3					1	1								6
Sobic.010G214900	SORBI_3010G214900				13		1		1					2						3			1											5
Sobic.010G223300	SORBI_3010G223300			1	5									2	1																			3
Sobic.010G261200	SORBI_3010G261200			1	8									1	1																			7
Sobic.010G261500	SORBI_3010G261500			1	6		1							2	1																			3
Numbers in different functional effect columns showed the number of associated CNV type SVs.
