# Supplementary material for: Major impacts of widespread structural variation on sorghum
Source: HighWire-hosted journal article supplement (doi:10.1101/gr.278396.123), 2024-02-01
Supplement: Supplemental_Table_S16.xlsx [file Supplemental_Table_S16.xlsx]

## Sheet: Sheet1
Supplemental Table S16 Sorghum oil orthologs associated with rearrangement type SVs
Sorghum ortholog IDs	Sorghum ortholog IDs in NCBI	variants_impact_HIGH	variants_impact_LOW	variants_impact_MODIFIER	variants_effect_3_prime_UTR_variant	variants_effect_5_prime_UTR_variant	variants_effect_downstream_gene_variant	variants_effect_frameshift_variant	variants_effect_intron_variant	variants_effect_non_coding_transcript_exon_variant	variants_effect_splice_acceptor_variant	variants_effect_splice_donor_variant	variants_effect_splice_region_variant	variants_effect_start_lost	variants_effect_start_retained_variant	variants_effect_stop_lost	variants_effect_stop_retained_variant	variants_effect_upstream_gene_variant
Sobic.001G003300	SORBI_3001G003300			27					27										54
Sobic.001G005700	SORBI_3001G005700																		0
Sobic.001G008600	SORBI_3001G008600			5			1											4	10
Sobic.001G023100	SORBI_3001G023100			4	2													2	8
Sobic.001G029200	SORBI_3001G029200			8	1		7												16
Sobic.001G050300	SORBI_3001G050300			20	2		1		1									16	40
Sobic.001G059500	SORBI_3001G059500			3			3												6
Sobic.001G066700	SORBI_3001G066700			3			1		2										6
Sobic.001G069700	SORBI_3001G069700			18			5											13	36
Sobic.001G077400	SORBI_3001G077400			4			2											2	8
Sobic.001G086500	SORBI_3001G086500			2			2												4
Sobic.001G111700	SORBI_3001G111700			72			5											67	144
Sobic.001G118300	SORBI_3001G118300			7		3												4	14
Sobic.001G120400	SORBI_3001G120400			16			13											3	32
Sobic.001G121900	SORBI_3001G121900			10			7											3	20
Sobic.001G125800	SORBI_3001G125800			22			7		4									11	44
Sobic.001G125900	SORBI_3001G125900			18			9											9	36
Sobic.001G128500	SORBI_3001G128500			7	4		1											2	14
Sobic.001G155500	SORBI_3001G155500			5														5	10
Sobic.001G175600	SORBI_3001G175600			14		2	2		3									7	28
Sobic.001G200800	SORBI_3001G200800			22			4											18	44
Sobic.001G200900	SORBI_3001G200900			20			10											10	40
Sobic.001G215000	SORBI_3001G215000			18		1	13											4	36
Sobic.001G222700	SORBI_3001G222700			5			1											4	10
Sobic.001G230100	SORBI_3001G230100	4		38		2	5	4	15									16	84
Sobic.001G270400	SORBI_3001G270400			6			1		4									1	12
Sobic.001G282900	SORBI_3001G282900			18			13											5	36
Sobic.001G286600	SORBI_3001G286600	2		34			28	2										6	72
Sobic.001G290000	SORBI_3001G290000			19														19	38
Sobic.001G295700	SORBI_3001G295700			20			18											2	40
Sobic.001G302300	SORBI_3001G302300			20			17											3	40
Sobic.001G320200	SORBI_3001G320200	25		39			8	25										31	128
Sobic.001G329800	SORBI_3001G329800	7		55	6	3	3	7	1									42	124
Sobic.001G333900	SORBI_3001G333900			38			4		6									28	76
Sobic.001G345100	SORBI_3001G345100			4			4												8
Sobic.001G360900	SORBI_3001G360900			3			2		1										6
Sobic.001G403400	SORBI_3001G403400			28			6		1									21	56
Sobic.001G409000	SORBI_3001G409000			11			1											10	22
Sobic.001G412100	SORBI_3001G412100			10		1	4											5	20
Sobic.001G413700	SORBI_3001G413700			1			1												2
Sobic.001G424600	SORBI_3001G424600			21			18											3	42
Sobic.001G427900	SORBI_3001G427900			7			3											4	14
Sobic.001G433900	SORBI_3001G433900		2	25	4		21						2						54
Sobic.001G434900	SORBI_3001G434900			6			1											5	12
Sobic.001G453200	SORBI_3001G453200			26			16											10	52
Sobic.001G473200	SORBI_3001G473200			5														5	10
Sobic.001G481900	SORBI_3001G481900			9			6											3	18
Sobic.001G482300	SORBI_3001G482300			30			9		1									20	60
Sobic.001G483400	SORBI_3001G483400			24			3											21	48
Sobic.001G499100	SORBI_3001G499100			11			10											1	22
Sobic.001G510000	SORBI_3001G510000			74	4		25											45	148
Sobic.001G510300	SORBI_3001G510300			11			5											6	22
Sobic.001G510400	SORBI_3001G510400			15			12											3	30
Sobic.001G524300	SORBI_3001G524300			6			6												12
Sobic.001G527200	SORBI_3001G527200			18			9											9	36
Sobic.001G543700	SORBI_3001G543700	1		6					1		1							6	15
Sobic.002G000600	SORBI_3002G000600			36			7											29	72
Sobic.002G010100	SORBI_3002G010100			17			11		3									3	34
Sobic.002G050400	SORBI_3002G050400			52	11		13											28	104
Sobic.002G070200	SORBI_3002G070200			64	1		11		26									26	128
Sobic.002G078300	SORBI_3002G078300	14		44		3	18	14										23	116
Sobic.002G081500	SORBI_3002G081500			7					1									6	14
Sobic.002G109100	SORBI_3002G109100			33			7											26	66
Sobic.002G122700	SORBI_3002G122700			17			1											16	34
Sobic.002G131300	SORBI_3002G131300			29			4											25	58
Sobic.002G131500	SORBI_3002G131500			9			5											4	18
Sobic.002G134100	SORBI_3002G134100	1	1	43	2		17	1	13				1					12	91
Sobic.002G167100	SORBI_3002G167100			25			13		2									10	50
Sobic.002G175400	SORBI_3002G175400			19			11											8	38
Sobic.002G181800	SORBI_3002G181800			17					4									13	34
Sobic.002G201300	SORBI_3002G201300			21	8		8											5	42
Sobic.002G206200	SORBI_3002G206200			53	23		16		3									11	106
Sobic.002G214400	SORBI_3002G214400			29			1											28	58
Sobic.002G215700	SORBI_3002G215700			44					20									24	88
Sobic.002G218500	SORBI_3002G218500			16			10		2									4	32
Sobic.002G235900	SORBI_3002G235900			6														6	12
Sobic.002G256900	SORBI_3002G256900			35			9		24									2	70
Sobic.002G261300	SORBI_3002G261300			45			28											17	90
Sobic.002G265300	SORBI_3002G265300			17			3											14	34
Sobic.002G267500	SORBI_3002G267500			20			3											17	40
Sobic.002G270900	SORBI_3002G270900			13			6		4									3	26
Sobic.002G271900	SORBI_3002G271900			10		8												2	20
Sobic.002G277900	SORBI_3002G277900			5	1	1	3												10
Sobic.002G280400	SORBI_3002G280400			34			12		2									20	68
Sobic.002G283600	SORBI_3002G283600			2			2												4
Sobic.002G302900	SORBI_3002G302900	1		16		4		1										12	34
Sobic.002G339500	SORBI_3002G339500			3	3														6
Sobic.002G341600	SORBI_3002G341600	1		30	1	4	6	1										19	62
Sobic.002G374600	SORBI_3002G374600			5			2											3	10
Sobic.002G378000	SORBI_3002G378000			12		7												5	24
Sobic.002G403100	SORBI_3002G403100			13			7											6	26
Sobic.002G418200	SORBI_3002G418200			25			9											16	50
Sobic.002G430100	SORBI_3002G430100			5														5	10
Sobic.002G430500	SORBI_3002G430500			22			17		4									1	44
Sobic.003G028900	SORBI_3003G028900	4		45		6	17	4	6									16	98
Sobic.003G038000	SORBI_3003G038000			10			7											3	20
Sobic.003G045700	SORBI_3003G045700			57			17		7									33	114
Sobic.003G064800	SORBI_3003G064800			11														11	22
Sobic.003G092800	SORBI_3003G092800			22			13											9	44
Sobic.003G095800	SORBI_3003G095800			46			24											22	92
Sobic.003G109100	SORBI_3003G109100			11			3		5									3	22
Sobic.003G109200	SORBI_3003G109200			4			4												8
Sobic.003G127200	SORBI_3003G127200			7			4											3	14
Sobic.003G131200	SORBI_3003G131200			6			3		1									2	12
Sobic.003G145900	SORBI_3003G145900			15			2		2									11	30
Sobic.003G146900	SORBI_3003G146900	2		17			15	2	2										38
Sobic.003G149400	SORBI_3003G149400		1	10			2		6				1					3	23
Sobic.003G150200	SORBI_3003G150200			21	6		7											8	42
Sobic.003G153700	SORBI_3003G153700			22			14		3									5	44
Sobic.003G162400	SORBI_3003G162400			22			7		4									11	44
Sobic.003G187800	SORBI_3003G187800			50			41											9	100
Sobic.003G220000	SORBI_3003G220000			12	1		1											10	24
Sobic.003G229700	SORBI_3003G229700			19			2		7									10	38
Sobic.003G242000	SORBI_3003G242000			5			5												10
Sobic.003G266500	SORBI_3003G266500			12			11											1	24
Sobic.003G266600	SORBI_3003G266600	3	1	16	9			3	8				1						41
Sobic.003G277700	SORBI_3003G277700			6					3									3	12
Sobic.003G278800	SORBI_3003G278800			23		2												21	46
Sobic.003G301900	SORBI_3003G301900			14			5											9	28
Sobic.003G304200	SORBI_3003G304200			20			17											3	40
Sobic.003G305200	SORBI_3003G305200			2			2												4
Sobic.003G309300	SORBI_3003G309300			6		1	5												12
Sobic.003G309600	SORBI_3003G309600			4														4	8
Sobic.003G317500	SORBI_3003G317500			31			19											12	62
Sobic.003G321900	SORBI_3003G321900			6		1												5	12
Sobic.003G326200	SORBI_3003G326200			4														4	8
Sobic.003G326300	SORBI_3003G326300			12			12												24
Sobic.003G327800	SORBI_3003G327800			19	3		3		4									9	38
Sobic.003G333000	SORBI_3003G333000			5			1											4	10
Sobic.003G337400	SORBI_3003G337400	2		4			2	2										2	12
Sobic.003G346100	SORBI_3003G346100			6														6	12
Sobic.003G354400	SORBI_3003G354400			7			1											6	14
Sobic.003G356500	SORBI_3003G356500			7			7												14
Sobic.003G357100	SORBI_3003G357100			27			14											13	54
Sobic.003G360700	SORBI_3003G360700			64			23		3									38	128
Sobic.003G362000	SORBI_3003G362000			29			4											25	58
Sobic.003G377100	SORBI_3003G377100			12			7											5	24
Sobic.003G385500	SORBI_3003G385500	3		52			36	3	5				1					11	111
Sobic.003G385900	SORBI_3003G385900	1		19			6	1										13	40
Sobic.003G387100	SORBI_3003G387100			31			9		2									20	62
Sobic.003G387300	SORBI_3003G387300			27	5	12	8											2	54
Sobic.003G394100	SORBI_3003G394100			10			5											5	20
Sobic.003G398200	SORBI_3003G398200			38			30		4									4	76
Sobic.003G412700	SORBI_3003G412700			31	1		21											9	62
Sobic.003G418700	SORBI_3003G418700			26		2	14											10	52
Sobic.003G430100	SORBI_3003G430100			21			3		5									13	42
Sobic.003G443400	SORBI_3003G443400			3														3	6
Sobic.003G444600	SORBI_3003G444600			13			9											4	26
Sobic.004G016400	SORBI_3004G016400			27		1	17											9	54
Sobic.004G024200	SORBI_3004G024200		1	61	1		21		4				1					35	124
Sobic.004G037900	SORBI_3004G037900			25			18											7	50
Sobic.004G058200	SORBI_3004G058200			45	16		4											25	90
Sobic.004G062500	SORBI_3004G062500			4														4	8
Sobic.004G063600	SORBI_3004G063600			29	1		28												58
Sobic.004G064000	SORBI_3004G064000	1		22	2		3	1	8							1		9	47
Sobic.004G083000	SORBI_3004G083000			35					2									33	70
Sobic.004G084800	SORBI_3004G084800	2		62			6	2										56	128
Sobic.004G086800	SORBI_3004G086800			28			1											27	56
Sobic.004G088100	SORBI_3004G088100			103		2	16											85	206
Sobic.004G124200	SORBI_3004G124200			4														4	8
Sobic.004G130500	SORBI_3004G130500			3					2									1	6
Sobic.004G152800	SORBI_3004G152800	1		8			1	1	6				1					1	19
Sobic.004G157300	SORBI_3004G157300	1		33			18		11			1						5	69
Sobic.004G158000	SORBI_3004G158000			19			5											14	38
Sobic.004G169000	SORBI_3004G169000			20		6	1		5									8	40
Sobic.004G176200	SORBI_3004G176200			21			14											7	42
Sobic.004G178100	SORBI_3004G178100			17			6		4									7	34
Sobic.004G193700	SORBI_3004G193700	1		25			9		1			1						16	53
Sobic.004G203900	SORBI_3004G203900			4			2											2	8
Sobic.004G212500	SORBI_3004G212500			24		1	18											5	48
Sobic.004G218100	SORBI_3004G218100			21					4									17	42
Sobic.004G237600	SORBI_3004G237600			96			19		48									29	192
Sobic.004G252400	SORBI_3004G252400			4			1											3	8
Sobic.004G260600	SORBI_3004G260600			5			5												10
Sobic.004G261900	SORBI_3004G261900			32			9											23	64
Sobic.004G268300	SORBI_3004G268300			13	6		4											3	26
Sobic.004G269700	SORBI_3004G269700			13		2												11	26
Sobic.004G272700	SORBI_3004G272700			6														6	12
Sobic.004G283600	SORBI_3004G283600			36			30		4									2	72
Sobic.004G293100	SORBI_3004G293100			13		3												10	26
Sobic.004G297600	SORBI_3004G297600			8			4											4	16
Sobic.004G310000	SORBI_3004G310000			14					1									13	28
Sobic.004G319300	SORBI_3004G319300			28		1												27	56
Sobic.004G324100	SORBI_3004G324100			28			7		2									19	56
Sobic.004G325700	SORBI_3004G325700			26			19											7	52
Sobic.004G334000	SORBI_3004G334000			12			3											9	24
Sobic.004G342200	SORBI_3004G342200			35			15											20	70
Sobic.005G000100	SORBI_3005G000100			10			1		1									8	20
Sobic.005G017200	SORBI_3005G017200			10		2			3									5	20
Sobic.005G021000	SORBI_3005G021000	1		20			2	1	5									13	42
Sobic.005G056000	SORBI_3005G056000			14			4											10	28
Sobic.005G063300	SORBI_3005G063300	3	1	46			2	3	22				1					23	101
Sobic.005G063400	SORBI_3005G063400	6		31			7	6	8									16	74
Sobic.005G072200	SORBI_3005G072200			17	1		12		1									3	34
Sobic.005G104500	SORBI_3005G104500			1			1												2
Sobic.005G110000	SORBI_3005G110000			1														1	2
Sobic.005G110040	SORBI_3005G110040																		0
Sobic.005G110080	SORBI_3005G110080			2			2												4
Sobic.005G111400	SORBI_3005G111400			2														2	4
Sobic.005G126800	SORBI_3005G126800			21			19											2	42
Sobic.005G144300	SORBI_3005G144300			1			1												2
Sobic.005G170100	SORBI_3005G170100			22					3									19	44
Sobic.005G186100	SORBI_3005G186100	2		68			60	2	2									6	140
Sobic.005G186200	SORBI_3005G186200	2		34			29	2	2									3	72
Sobic.005G186400	SORBI_3005G186400			20			14											6	40
Sobic.005G197100	SORBI_3005G197100			6			3											3	12
Sobic.005G218000	SORBI_3005G218000			25					5									20	50
Sobic.005G222200	SORBI_3005G222200		1	95	1	50	3		28				1					14	193
Sobic.006G002400	SORBI_3006G002400	1		65				1	65										132
Sobic.006G011200	SORBI_3006G011200			10			5											5	20
Sobic.006G033700	SORBI_3006G033700	1		16	4		4	1										8	34
Sobic.006G043700	SORBI_3006G043700			19			8		10									1	38
Sobic.006G054800	SORBI_3006G054800			34	6		1											27	68
Sobic.006G060000	SORBI_3006G060000			13														13	26
Sobic.006G066400	SORBI_3006G066400			19			4											15	38
Sobic.006G075100	SORBI_3006G075100			10			4											6	20
Sobic.006G094500	SORBI_3006G094500	4		52			12	4										40	112
Sobic.006G123200	SORBI_3006G123200			26														26	52
Sobic.006G125600	SORBI_3006G125600			8														8	16
Sobic.006G125800	SORBI_3006G125800			9			3		4									2	18
Sobic.006G143600	SORBI_3006G143600			27			23											4	54
Sobic.006G144500	SORBI_3006G144500			7			3											4	14
Sobic.006G157100	SORBI_3006G157100			21			1											20	42
Sobic.006G167700	SORBI_3006G167700			20			11											9	40
Sobic.006G171700	SORBI_3006G171700			3			1											2	6
Sobic.006G177000	SORBI_3006G177000			6			4											2	12
Sobic.006G211000	SORBI_3006G211000	1		38		1	1	1	22									14	78
Sobic.006G213700	SORBI_3006G213700			7			3											4	14
Sobic.006G213800	SORBI_3006G213800			5			2		2									1	10
Sobic.006G214500	SORBI_3006G214500	1		8		2	2	1	4										18
Sobic.006G237000	SORBI_3006G237000			12			1		10									1	24
Sobic.006G239800	SORBI_3006G239800			42		1	13		3									25	84
Sobic.006G270900	SORBI_3006G270900			49			28											21	98
Sobic.007G001600	SORBI_3007G001600			6			6												12
Sobic.007G008900	SORBI_3007G008900			3			1											2	6
Sobic.007G011300	SORBI_3007G011300			17	2				3									12	34
Sobic.007G026200	SORBI_3007G026200			23			12		1									10	46
Sobic.007G052700	SORBI_3007G052700			4														4	8
Sobic.007G054500	SORBI_3007G054500			5			5												10
Sobic.007G062000	SORBI_3007G062000			19			15											4	38
Sobic.007G065600	SORBI_3007G065600	17		28			22	17										6	90
Sobic.007G077400	SORBI_3007G077400			31	1		8		5									17	62
Sobic.007G079600	SORBI_3007G079600			21			11											10	42
Sobic.007G091200	SORBI_3007G091200			5			2											3	10
Sobic.007G122400	SORBI_3007G122400			3														3	6
Sobic.007G133000	SORBI_3007G133000		1	42	17		13		2				1					11	87
Sobic.007G134800	SORBI_3007G134800			8														8	16
Sobic.007G138800	SORBI_3007G138800			5														5	10
Sobic.007G138900	SORBI_3007G138900			3														3	6
Sobic.007G140800	SORBI_3007G140800			33			1											32	66
Sobic.007G151100	SORBI_3007G151100			69			5											64	138
Sobic.007G162400	SORBI_3007G162400			15			7											8	30
Sobic.007G163100	SORBI_3007G163100			21		4	4		10									3	42
Sobic.007G165800	SORBI_3007G165800			20			15											5	40
Sobic.007G170800	SORBI_3007G170800			12			2											10	24
Sobic.007G173100	SORBI_3007G173100			5	1													4	10
Sobic.007G176800	SORBI_3007G176800			20	2		9											9	40
Sobic.007G180700	SORBI_3007G180700			19			7											12	38
Sobic.007G192200	SORBI_3007G192200			3			3												6
Sobic.007G198300	SORBI_3007G198300	1		17		2	10	1	4									1	36
Sobic.007G203500	SORBI_3007G203500			6			2											4	12
Sobic.007G209800	SORBI_3007G209800			3														3	6
Sobic.007G210700	SORBI_3007G210700			16			7											9	32
Sobic.008G000100	SORBI_3008G000100	1		6			3	1	3										14
Sobic.008G010800	SORBI_3008G010800			31			3		3									25	62
Sobic.008G030700	SORBI_3008G030700			18			5											13	36
Sobic.008G030900	SORBI_3008G030900			67	1		61											5	134
Sobic.008G031200	SORBI_3008G031200	2		53		1	42	2										10	110
Sobic.008G038900	SORBI_3008G038900			57			14											43	114
Sobic.008G112100	SORBI_3008G112100			15			1		8									6	30
Sobic.008G116400	SORBI_3008G116400			88		1	8											79	176
Sobic.008G132700	SORBI_3008G132700			11			2		2									7	22
Sobic.008G173000	SORBI_3008G173000			10														10	20
Sobic.008G181400	SORBI_3008G181400			18			6											12	36
Sobic.008G183400	SORBI_3008G183400	1		68	8		18	1	24									18	138
Sobic.009G014600	SORBI_3009G014600			15			4											11	30
Sobic.009G032100	SORBI_3009G032100			23			22											1	46
Sobic.009G034600	SORBI_3009G034600			17			13											4	34
Sobic.009G052200	SORBI_3009G052200			39			24											15	78
Sobic.009G054000	SORBI_3009G054000		1						1				1						3
Sobic.009G083300	SORBI_3009G083300			41			15		21									5	82
Sobic.009G111400	SORBI_3009G111400	1		9		1		1	2									6	20
Sobic.009G112500	SORBI_3009G112500																		0
Sobic.009G117500	SORBI_3009G117500			14			8											6	28
Sobic.009G123300	SORBI_3009G123300			1														1	2
Sobic.009G135100	SORBI_3009G135100			13	2		7											4	26
Sobic.009G152600	SORBI_3009G152600			40	2		30											8	80
Sobic.009G152800	SORBI_3009G152800			35			2		3									30	70
Sobic.009G159000	SORBI_3009G159000			11			3											8	22
Sobic.009G162000	SORBI_3009G162000			21			2											19	42
Sobic.009G165400	SORBI_3009G165400			7			3											4	14
Sobic.009G178500	SORBI_3009G178500		1	27			11		10				1					7	57
Sobic.009G181800	SORBI_3009G181800			24			12		2									10	48
Sobic.009G188900	SORBI_3009G188900			12			2											10	24
Sobic.009G211000	SORBI_3009G211000			2					2										4
Sobic.009G218900	SORBI_3009G218900			22			11		5									6	44
Sobic.009G221500	SORBI_3009G221500			49			15		3									31	98
Sobic.009G221900	SORBI_3009G221900			72	14	1	45											12	144
Sobic.009G222000	SORBI_3009G222000			69		1	43											25	138
Sobic.009G225100	SORBI_3009G225100			10														10	20
Sobic.009G226600	SORBI_3009G226600			75			4		56									15	150
Sobic.009G236100	SORBI_3009G236100			18	3		7											8	36
Sobic.009G241900	SORBI_3009G241900			14			8											6	28
Sobic.010G012800	SORBI_3010G012800			45			34		1									10	90
Sobic.010G033300	SORBI_3010G033300			20			5											15	40
Sobic.010G043200	SORBI_3010G043200			27			2											25	54
Sobic.010G047300	SORBI_3010G047300			20		1	18											1	40
Sobic.010G049100	SORBI_3010G049100			19			3											16	38
Sobic.010G052200	SORBI_3010G052200			13	1		6											6	26
Sobic.010G081100	SORBI_3010G081100			51			3		16									32	102
Sobic.010G084300	SORBI_3010G084300	9	2	61		1	22	8	4			1	3			1		37	149
Sobic.010G084400	SORBI_3010G084400			46	1		29											16	92
Sobic.010G084600	SORBI_3010G084600	12		36			9	12										27	96
Sobic.010G092200	SORBI_3010G092200	1		4				1										4	10
Sobic.010G105000	SORBI_3010G105000			27			12											15	54
Sobic.010G105800	SORBI_3010G105800	1		26			23	1										3	54
Sobic.010G118200	SORBI_3010G118200			1		1													2
Sobic.010G139500	SORBI_3010G139500			19		3	16												38
Sobic.010G171000	SORBI_3010G171000			26			2		6									18	52
Sobic.010G180400	SORBI_3010G180400			15			4											11	30
Sobic.010G181500	SORBI_3010G181500			15	4		8											3	30
Sobic.010G185300	SORBI_3010G185300			22			3											19	44
Sobic.010G187500	SORBI_3010G187500			32		2												30	64
Sobic.010G190300	SORBI_3010G190300			120			102		4									14	240
Sobic.010G193300	SORBI_3010G193300			30					7									23	60
Sobic.010G210900	SORBI_3010G210900	4		17		5	4	4										8	42
Sobic.010G212600	SORBI_3010G212600			74	25		3		36									10	148
Sobic.010G214900	SORBI_3010G214900	1		51		2	12	1	14									23	104
Sobic.010G223300	SORBI_3010G223300			6			1											5	12
Sobic.010G261200	SORBI_3010G261200			13														13	26
Sobic.010G261500	SORBI_3010G261500			1														1	2
Numbers in different functional effect columns showed the number of associated rearrangement type SVs.
