# Supplementary material for: Major impacts of widespread structural variation on sorghum
Source: HighWire-hosted journal article supplement (doi:10.1101/gr.278396.123), 2024-02-01
Supplement: Supplemental_Table_S17.xlsx [file Supplemental_Table_S17.xlsx]

## Sheet: Sheet1
Supplementary Table S17 Precision, recall, F1, and Accuracy scores of the prediction model
Tissue:Stage	Gene expression	precision	recall	F1 score	Accuracy
Leaf:Pre-flowering	Non-DEG	0.86486	0.8	0.83117	0.85057
	DEG	0.84	0.89362	0.86598
Leaf:Flowering	Non-DEG	0.87179	0.7907	0.82927	0.81818
	DEG	0.76316	0.85294	0.80556
Leaf:Milk	Non-DEG	0.8843	0.95536	0.91845	0.91703
	DEG	0.9537	0.88034	0.91556
Stem:Pre-flowering	Non-DEG	0.8	0.8	0.8	0.81395
	DEG	0.82609	0.82609	0.82609
Stem:Flowering	Non-DEG	0.94286	0.97778	0.96	0.95956
	DEG	0.97727	0.94161	0.95911
Stem:Milk	Non-DEG	0.83333	1	0.90909	0.90323
	DEG	1	0.8125	0.89655
